# Supplementary material
Source: PubMed Central journal article supplement (PMC3576146)
Supplement: NIHMS429464-supplement-1.pdf [file NIHMS429464-supplement-1.pdf]

# Simple Organic Molecules as Catalysts for Enantioselective Synthesis of Amines and Alcohols

Daniel L. Silverio, Sebastian Torker, Tatiana Pilyugina, Erika M. Vieira,  
Marc L. Snapper, Fredrik Haeffner & Amir H. Hoveyda\*

Department of Chemistry, Merkert Chemistry Center, Boston College, Chestnut Hill, Massachusetts 02467

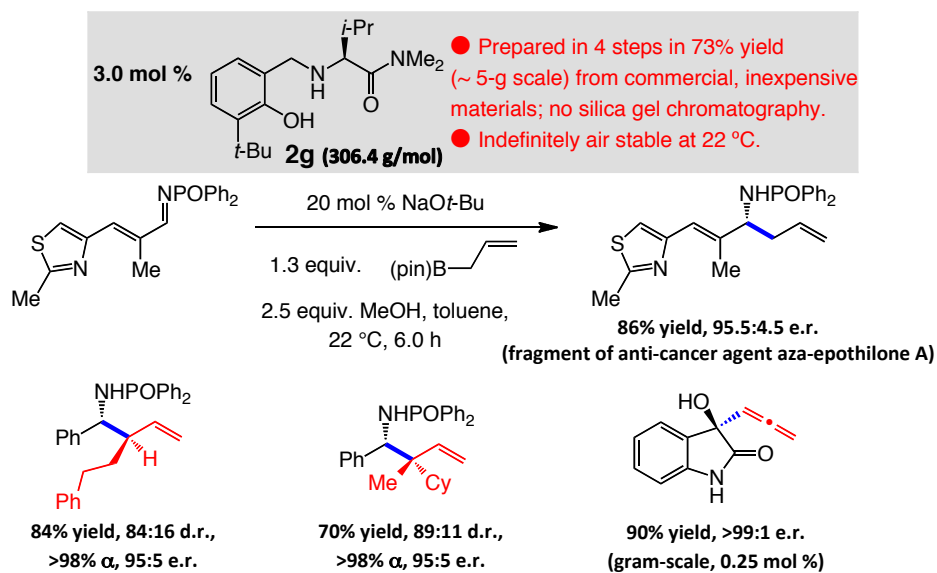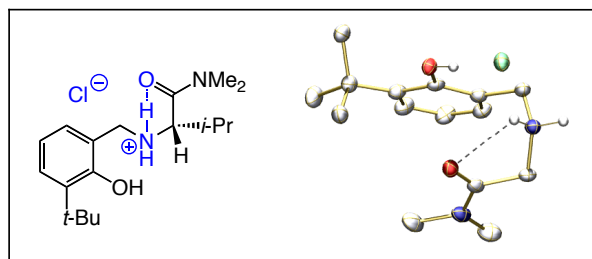

*Supplementary Information is in Four Parts:*

SUPPLEMENTARY INFORMATION; PART A

SUPPLEMENTARY INFORMATION; PART B

SUPPLEMENTARY INFORMATION; PART C

SUPPLEMENTARY INFORMATION; PART D

*Page*

S1

S60

S83

S143

## SUPPLEMENTARY INFORMATION; PART A

| <b>Table of Contents</b>                                                                                                                                                                              | <b>Page</b> |
|-------------------------------------------------------------------------------------------------------------------------------------------------------------------------------------------------------|-------------|
| <i>Bibliography of Diastereoselective Approaches to Synthesis of Homoallylic Amines &amp; Derivatives</i>                                                                                             | S3          |
| <i>General</i>                                                                                                                                                                                        | S5          |
| <i>Solvents</i>                                                                                                                                                                                       | S6          |
| <i>Reagents</i>                                                                                                                                                                                       | S6          |
| <i>Synthesis, Purification, and Analytical Data for Amino Acid-Based Aminophenols <b>2a–2h</b>:</i>                                                                                                   | S8          |
| <i>Preparation, Purification, and Analytical Data for Aldimine Substrates</i>                                                                                                                         | S13         |
| <i>Preparation, Purification, and Analytical Data for Isatin Substrates</i>                                                                                                                           | S16         |
| <i>Procedure for Gram-Scale Catalytic Enantioselective Allyl Addition to Aldimine <b>3a</b> to Afford Homoallylamide <b>4a</b> and Analytical Data for <b>4a</b></i>                                  | S17         |
| <i>Procedure for Small-Scale Catalytic Enantioselective Allyl Additions to Aldimines <b>3b–7</b> and Analytical Data for the Resultant Homoallylamides</i>                                            | S18         |
| <i>Procedure for Catalytic Enantioselective Allyl Additions to Alkyl-Substituted Aldimines <b>8a–8c</b> and Analytical Data for the Resultant Homoallylamides</i>                                     | S34         |
| <i>Preparation, Purification, and Analytical Data for Homoallylamide <b>4o</b> and Deuterated Homoallylamide <b>d<sub>2</sub>-4o</b></i>                                                              | S37         |
| <i>Procedure for Enantioselective Allyl Additions to Aldimine <b>3a</b> with Enantiomerically Enriched Allylboronates and Analytical Data for the Resultant Homoallylamides <b>10, 11, and 13</b></i> | S39         |
| <i>Procedure for Catalytic Enantioselective Allyl Additions to Isatins and Analytical Data for the Resultant Homoallylalcohols</i>                                                                    | S44         |
| <i>Procedure for Catalytic Enantioselective Allenyl Additions to Isatins and Analytical Data for the Resultant Allenylalcohols</i>                                                                    | S50         |
| <i>Preparation, Purification, and Analytical Data for <math>\alpha</math>-Hydroxy Alcohol <b>22</b></i>                                                                                               | S54         |
| <i>Aminophenol Catalyzed Enantioselective Allyl Addition to an N-Aryl Aldimine</i>                                                                                                                    | S55         |

*Representative Example of Utilization of DBU as the Base Instead of NaOt-Bu* S56  
*for the Enantioselective Allyl Addition to Aldimine 3a*  
*Proof of Absolute Stereochemistry of Products* S56

### **Diastereoselective Approaches to Synthesis of Homoallylic Amines & Derivatives**

Significant advances have been made towards synthesis of diastereomerically enriched homoallylic amine derivatives through the use of an enantiomerically pure substrate or reagent. Some of the key disclosures in this area are provided below.

**i.** For examples that involve the use of an enantiomerically pure allylboron, see:

(a) Ramachandran, P. V. & Burghardt, T. E. Recent developments in the chiral synthesis of homoallylic amines via organoboranes. *Pure Appl. Chem.* **78**, 1397–1406 (2006).

(b) Ramandhar, T. R. & Batey, R. A. Allylation of imines and their derivatives with organoboron reagents: Stereocontrolled synthesis of homoallylic amines. *Synthesis* **9**, 1321–1346 (2011).

**ii.** For examples that involve the use of an enantiomerically pure allylsilane, see:

(c) Panek, J. S. & Jain, N. F. Direct amino-crotylsilylation of achiral acetals and aldehydes: Asymmetric synthesis of homoallylic amines and functionalized pyrrolidines. *J. Org. Chem.* **59**, 2674–2675 (1994).

(d) Leighton, J. L. Powerful and versatile silicon Lewis acids for asymmetric chemical synthesis. *Aldrichimica Acta* **43**, 3–14 (2010).

**iii.** For examples that involve the use of an enantiomerically pure alcohol, see:

(e) Takahashi, M., McLaughlin, M. & Micalizio, G. C. Complex allylation by the direct cross-coupling of imines with unactivated allylic alcohols. *Angew. Chem. Int. Ed.* **48**, 3648–3652 (2009).

(f) Lysenko, I. L., Lee, H. G. & Cha, J. K. Stereoselective cross-coupling between allylic alcohols and aldimines. *Org. Lett.* **11**, 3132–3134 (2009).

(g) Chen, M. Z. et al. Preparation of stereodefined homoallylic amines from the reductive cross-coupling of allylic alcohols with imines. *J. Org. Chem.* **75**, 8048–8059 (2010).

(h) Yang, D. & Micalizio, G. C. Convergent and stereodivergent synthesis of complex 1-aza-7-oxabicyclo[2.2.1]heptenes. *J. Am. Chem. Soc.* **133**, 9216–9219 (2011).

**iv.** For examples of reactions mediated by a chiral Lewis base, see:

(i) Kobayashi, S., Sugiura, M. & Ogawa, C. Neutral coordinate-organocatalysts in organic synthesis: Allylation of acylhydrazones with allyltrichlorosilanes. *Adv. Synth. Catal.* **346**, 1023–1034 (2004).

v. For examples of diastereoselective additions of an allyl group to enantiomerically pure imines bearing an Ellman-type auxiliary, see:

(j) Cogan, D. A., Liu, G. & Ellman, J. Asymmetric synthesis of chiral amines by highly diastereoselective 1,2-additions of organometallic reagents to *N-tert*-butanesulfinyl imines *Tetrahedron* **55**, 8883–8904 (1999).

(k) Sun, X.-W., Xu, M.-H. & Lin, G.-Q. Room-temperature highly diastereoselective Zn-mediated allylation of chiral *N-tert*-butanesulfinyl imines: Remarkable reaction condition controlled stereoselectivity reversal. *Org. Lett.* **8**, 4979–4982 (2006).

(l) González-Gómez, J. C., Medjahdi, M.; Foubelo, F. & Yus, M. Stereoselective  $\alpha$ -aminoallylation of aldehydes with chiral *tert*-butanesulfamides and allyl bromides. *J. Org. Chem.* **75**, 6308–6311 (2010).

(m) Liu, M., Shen, A., Sun, X.-W., Deng, F.; Xu, M.-H. & Lin, G.-Q. Dramatic lithium chloride effect on the reaction stereocontrol in Zn-mediated asymmetric cinnamylation: Highly practical synthesis of  $\beta$ -aryl homoallylic amines. *Chem. Commun.* **46**, 8460–8462 (2010).

vi. For examples of diastereoselective addition of an allyl group to enantiomerically pure imines derived from various  $\alpha$ -amino acids, see:

(n) Yanada, R., Kaieda, A. & Takemoto, Y. Diastereoselective Barbier-type and palladium-mediated allylation of optically active aldimine with allylindium reagents. *J. Org. Chem.* **66**, 7516–7518 (2001).

(o) Sugimoto, Y., Imamura, H., Sakoh, H., Yamada, K. & Morishima, H. Diastereoselective allylation of a chiral imine with allylzinc reagents: Diastereoselective synthesis of a novel broad spectrum carbapenem. *Synlett* **11**, 1747–1750 (2001).

(p) Cook, G. R., Maity, B. C. & Kargbo, R. Highly diastereoselective indium-mediated allylation of chiral hydrazones. *Org. Lett.* **6**, 1741–1743 (2004).

(q) Friestad, G. K., Korapala, C. S. & Ding, H. Dual activation in asymmetric allylsilane addition to chiral *N*-acylhydrazones: Method development, mechanistic studies, and elaboration of homoallylic amine adducts. *J. Org. Chem.* **71**, 281–289 (2006).

(r) Vilaivan, T., Winotapan, C., Banphavichit, V., Shinada, T. & Ohfuné, Y. Indium-mediated asymmetric Barbier-type allylation of aldimines in alcoholic solvents: Synthesis of optically active homoallylic amines. *J. Org. Chem.* **70**, 3464–3471 (2005).



vii. For other categories of diastereoselective addition of an allyl group to enantiomerically pure imines, see:

(s) Laschat, S. & Kunz, H. Carbohydrates as chiral templates: Diastereoselective synthesis of *N*-glycosyl-*N*-homoallylamines and  $\beta$ -amino acids from imines. *J. Org. Chem.* **56**, 5883–5889 (1991).

(t) Kulkarni, N. A., Yao, C-f. & Chen, K. On the scope of diastereoselective allylation of various chiral glyoxylic oxime ethers with allyltributylstannane in the presence of a Lewis acid and triallylaluminum. *Tetrahedron* **63**, 7816–7822 (2007).

(u) Kattuboina, A., Kaur, P., Nguyen, T. & Li, G. Chiral *N*-phosphoyl imine chemistry: Asymmetric 1,2-additions of allylmagnesium bromides. *Tetrahedron Lett.* **49**, 3722–3724 (2008).

(v) Suh, Y-g. *et al.* Expedient synthesis of chiral homoallylamines via *N,O*-acetal TMS ethers and its application. *Org. Lett.* **13**, 5920–5923 (2011).

■ **General.** Infrared (IR) spectra were recorded on a Bruker alpha spectrophotometer,  $\lambda_{\max}$  in  $\text{cm}^{-1}$ . Bands are characterized as broad (br), strong (s), medium (m), and weak (w).  $^1\text{H}$  NMR spectra were recorded on a Varian Unity INOVA 400 (400 MHz) spectrometer. Chemical shifts are reported in ppm from tetramethylsilane with the solvent resonance as the internal standard ( $\text{CDCl}_3$ :  $\delta$  7.26 ppm,  $\text{CD}_3\text{OD}$ :  $\delta$  3.34 ppm). Data are reported as follows: chemical shift, integration, multiplicity (s = singlet, d = doublet, t = triplet, q = quartet, sept = septet, br = broad, m = multiplet), and coupling constants (Hz).  $^{13}\text{C}$  NMR spectra were recorded on a Varian Unity INOVA 400 (100 MHz) or a Varian Unity INOVA 500 (125 MHz) spectrometer with complete proton decoupling. Chemical shifts are reported in ppm from tetramethylsilane with the solvent resonance as the internal standard ( $\text{CDCl}_3$ :  $\delta$  77.16 ppm). Data are reported as follows: chemical shift, multiplicity (singlet unless otherwise noted), and coupling constants (Hz).  $^2\text{H}$  NMR spectra were recorded on a Varian Unity INOVA 500 (76 MHz) tuned to the lock channel. High-resolution mass spectrometry was performed on a JEOL AccuTOF-DART (positive mode) at the Mass Spectrometry Facility, Boston College. Enantiomer ratios (er) values were determined by HPLC analysis using either a Shimadzu LC-2010AHT or SCL-10AVP chromatograph (Chiral Technologies Chiralcel OD (4.6 x 250 mm), Chiral Technologies Chiralcel OD-H (4.6 x 250 mm), Chiral Technologies Chiralcel OJ-H (4.6 x 250 mm), Chiral Technologies Chiralpak AD-H (4.6 x 250 mm), Chiral Technologies Chiralcel AZ-H (4.6 x 250 mm) columns), or GLPC (gas-liquid partition chromatography) with an Agilent chromatograph (Alltech Associated Chiraldex CD-BDM column (30 m x 0.25 mm) or a Hewlett Packard 5890 Series II chromatograph (Alltech Associated Betadex 120 column (30 m x 0.25 m)). Specific rotations were measured on a Rudolph Research Analytical Autopol IV Polarimeter. Melting points were determined using a Thomas Hoover Uni-melt capillary melting point apparatus.

■ **Solvents:** Unless otherwise noted, solvents were purged with Ar and purified under a positive pressure of dry Ar by a modified Innovative Technologies purification system. Toluene (Fisher, ACS Grade) was passed successively through activated copper and alumina columns. Dichloromethane (Fisher, ACS Grade) and diethyl ether (Aldrich, Chromasolv®) were passed successively through two activated alumina columns. Tetrahydrofuran was purified by distillation from sodium benzophenone ketyl immediately prior to use. Dimethyl Sulfoxide (anhydrous, 99.9+%) was purchased from Alfa Aesar and used as received.  $\text{CDCl}_3$  was purchased from Cambridge Isotope Laboratories and stored over activated 4Å molecular sieves prior to use.  $\text{CD}_3\text{OD}$  was purchased from Cambridge Isotope Laboratories and used as received.  $\text{CD}_3\text{C}_6\text{D}_5$  ( $d_8$ -toluene) was purchased from Cambridge Isotope Laboratories and distilled from sodium metal onto activated 4Å molecular sieves prior to use. All work-up and purification procedures were carried out in air with reagent grade solvents (purchased from Fisher).

■ **Reagents:**

**Allenylboronic Acid Pinacol Ester (19)** was obtained from Frontier Scientific and used as received.

**Allylboronates:** Allylboronic acid pinacol ester (**1a**) was purchased from Aldrich or obtained as a gift from Frontier Scientific, Inc and distilled prior to use. 1,1-Di-deuterioallylboronic acid pinacol ester (***d*<sub>2</sub>-1a**) was synthesized and purified in accordance with a procedure in the literature.<sup>1</sup> (2-Methylallyl)boronic acid pinacol ester (**1b**) was synthesized and purified in accordance with a procedure in the literature.<sup>2</sup> (2-Phenylallyl)boronic acid pinacol ester (**1c**) was synthesized and purified in accordance with a procedure in the literature.<sup>3</sup> Enantiomerically enriched  $\alpha$ -substituted allylboronates **S-9**, **R-9**, and **12** were synthesized and purified in accordance with a procedure in with the literature.<sup>4</sup>

**Benzyl Chloride** was purchased from Aldrich and distilled from  $\text{CaCl}_2$  prior to use.

**Boc-Val-OH** was purchased from Advanced ChemTech and used as received.

***tert*-Butanol** was purchased from Aldrich and distilled from sodium metal before use.

***n*-Butylamine** was purchased from Aldrich and used as received.

***tert*-Butyldimethylsilyl Chloride** was purchased from Strem and used as received.

**3-*tert*-Butyl-2-hydroxybenzaldehyde** was purchased from Aldrich and used as received.

**1,8-Diazabicycloundec-7-ene (DBU)** was purchased from Aldrich and distilled from  $\text{CaH}_2$  prior to use.

---

(1) Sieber, J. D.; Morken, J. P. *J. Am. Chem. Soc.* **2008**, *130*, 4978–4983.

(2) Zhang, P.; Roundtree, I. A.; Morken, J. P. *Org. Lett.* **2012**, *14*, 1416–1419.

(3) Corberan, R.; Mszar, N. W.; Hoveyda, A. H. *Angew. Chem., Int. Ed.* **2011**, *50*, 7079–7082.

(4) Guzman-Martinez, A.; Hoveyda, A. H. *J. Am. Chem. Soc.* **2010**, *132*, 10634–10637.

**Diethylzinc** was purchased from Aldrich and used as received.

**Dimethylamine (40 wt % in H<sub>2</sub>O)** was purchased from Aldrich and used as received.

**1-Ethyl-3-(3-dimethylaminopropyl)carbodiimide Hydrochloride (EDC•HCl)** was purchased from Advanced ChemTech and used as received.

**Hydrochloric Acid (4.0 M in 1,4-dioxane)** was purchased from Aldrich and used as received.

**Hydrochloric Acid (12 M, 36.5-38.0 wt %)** was purchased from Alfa Aesar and used as received.

**1-Hydroxy-benzotriazole Hydrate (HOBt•H<sub>2</sub>O)** was purchased from Advanced ChemTech and used as received.

**Isatins.** Isatin and 5-methylisatin were purchased from Aldrich and used as received. 5-methoxyisatin was purchased from Oakwood and used as received. 4,6-Dibromoisatin was purchased from D-L Chiral Chemicals and was dissolved in methanol and copious purple solid impurities were removed by filtration.

**L-tert-Leucine** was purchased from Chem-Impex and Boc protected prior to use.

**Magnesium Sulfate** was purchased from Fisher and flame-dried under vacuum prior to use.

**Magnesium Bromide Diethyl Etherate (MgBr<sub>2</sub>•Et<sub>2</sub>O)** was purchased from Aldrich and used as received.

**Methanol** was purchased from Acros (99.8% anhydrous) and distilled at 1 atm from sodium metal prior to use or used as received.

**Potassium Carbonate** was purchased from Fisher and dried at 80 °C under vacuum for 12 h prior to use.

**Pyrrolidine** was purchased from Aldrich and used as received.

**Sodium Borohydride** was purchased from Aldrich and used as received.

**Sodium tert-Butoxide** was purchased from Strem and used as received.

**Sodium Hydride (60 wt% in oil)** was purchased from Strem and used as received.

**Sodium Periodate** was purchased from Acros and used as received.

**Titanium Tetrachloride (TiCl<sub>4</sub>)** was purchased from Aldrich and used as received.

**Triethylamine** was purchased from Aldrich and distilled from CaH<sub>2</sub> prior to use.

**2-(Trimethylsilyl)ethoxymethyl Chloride, technical grade (SEM-Cl)** was purchased from Aldrich and used as received.

**p-Toluenesulfonic Acid Monohydrate** was purchased from Aldrich and used as received.

**L-Valine Ethyl Ester Hydrochloride** was purchased from Aldrich and used as received.

**Zinc tert-Butoxide** was prepared by reaction of *tert*-butanol with diethylzinc. A flame-dried round bottom flask is purged with nitrogen, sealed with a septum and electrical tape,

and charged with toluene (100 mL) and *tert*-butanol (1.8 mL, 19 mmol) by syringe. The solution is cooled to  $-78\text{ }^{\circ}\text{C}$  and diethylzinc (**Caution Pyrophoric!** 1.5 mL, 15 mmol) is added dropwise by syringe over 10 minutes. The reaction is allowed to warm to  $22\text{ }^{\circ}\text{C}$  and to stir for 18 h. The toluene is removed by distillation under nitrogen at 1 atm. and the resulting solid is dried under vacuum for 12 h. The solid is removed from the flask in a nitrogen-filled glovebox to afford 1.5 g (7.1 mmol, 46% yield) of a white powder.

## ■ Synthesis, Purification, and Analytical Data for Amino Acid-Based Aminophenols 2a–2h

### Scheme S1: Representative Experimental Procedure for Synthesis of Aminophenol 2g (Figure 2a)

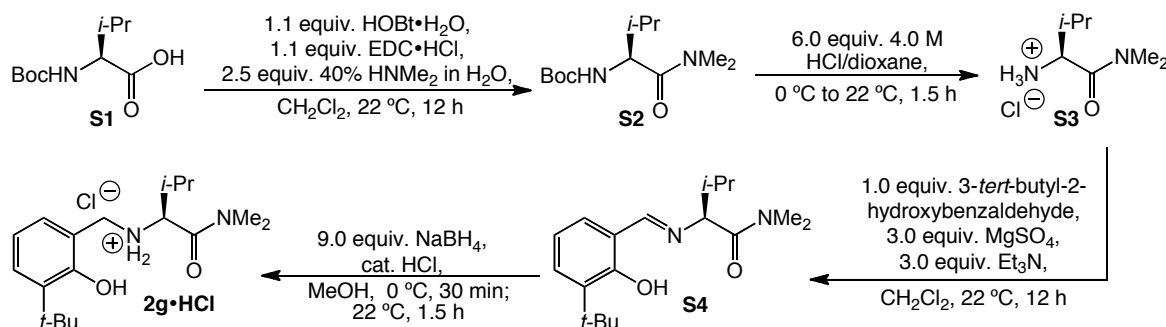

EDC·HCl (4.22 g, 22.0 mmol), reagent grade CH<sub>2</sub>Cl<sub>2</sub> (80 mL), HOBT·H<sub>2</sub>O (3.36 g, 22.0 mmol), and Boc-Val-OH (4.34 g, 20.0 mmol) are added successively at 22 °C under air to a 250 mL round bottom flask equipped with a stir bar. The light yellow solution is allowed to stir for five minutes and dimethylamine (40 wt % in H<sub>2</sub>O, 5.3 mL, 50 mmol) is added drop-wise over one minute. The flask with the resulting light yellow solution is sealed with a rubber septum and allowed to stir for 12 h at 22 °C. An aqueous solution of citric acid (10 wt %, 80 mL) is then added and the mixture is allowed to stir for 0.5 h during which time a white precipitate is formed. The precipitate is removed by filtration and the resulting two layers are separated. The organic layer is washed sequentially with an aqueous solution of citric acid (10 wt %, 80 mL), a saturated aqueous solution of NaHCO<sub>3</sub> (80 mL), and brine (80 mL) and is dried over Na<sub>2</sub>SO<sub>4</sub> to give (*S*)-*tert*-butyl (1-(dimethylamino)-3-methyl-1-oxobutan-2-yl)carbamate (**S2**) as pale yellow oil, which is employed without purification in the subsequent deprotection.

In a 100 mL round bottom flask, (*S*)-*tert*-butyl (1-(dimethylamino)-3-methyl-1-oxobutan-2-yl)carbamate **S2** (4.65 g, 19.3 mmol, 1.00 equiv.) is allowed to stir with a 4.0 M solution of hydrochloric acid in dioxane (28.9 mL, 116 mmol, 6.00 equiv.) for 1.5 h at 22 °C under air, after which the solution is purged with nitrogen for 30 min (removal of HCl gas) and the solvent is removed under reduced pressure to yield (*S*)-2-amino-*N,N*,3-trimethylbutanamide as HCl salt **S3**, which is used without purification in the subsequent condensation.

To the same flask (purged with nitrogen) is added 3-(*tert*-butyl)-2-hydroxybenzaldehyde

(3.43 g, 19.3 mmol, 1.00 equiv.) and  $\text{MgSO}_4$  (6.93 g, 57.8 mmol, 3.00 equiv.), followed by the addition of dichloromethane (70 mL) and triethylamine (8.11 mL, 57.8 mmol, 3.00 equiv.) through a syringe. The mixture is allowed to stir overnight at 22 °C under nitrogen during which time the solution becomes bright yellow. The mixture is filtered through a small plug of silica gel to remove both  $\text{MgSO}_4$  and triethylamine hydrochloride (which inhibits the following reduction) and silica plug is eluted with hexanes:ethyl acetate (2:1) until the solution becomes colorless. After evaporation of the volatiles, the remaining yellow oil is washed several times with hexanes (to remove residual triethylamine hydrochloride salt) and the combined filtrates are concentrated to afford (*S,E*)-2-((3-(*tert*-butyl)-2-hydroxybenzylidene)amino)-*N,N*,3-trimethyl-butanamide (**S4**) as yellow oil, which is utilized without purification in the follow-up reduction procedure.

To a 500 mL round bottom flask containing a solution of imine **S4** in 50 mL MeOH cooled to 0 °C,  $\text{NaBH}_4$  is added (5.83 g, 154 mmol, 8.00 equiv.) followed by a drop of 12 M aqueous hydrochloric acid. There is vigorous gas evolution upon addition of the acid and the yellow color of the solution disappears immediately. After the solution is allowed to stir for 30 min, the excess reducing agent is quenched through slow addition of a 2.0 M solution of aqueous HCl until the pH is less than one. The aqueous phase is then washed with dichloromethane (4 x 50 mL) and the combined organic layers are dried over anhydrous sodium sulfate, filtered and concentrated under reduced pressure. The white solid is purified by trituration from 10 mL dichloromethane and 80 mL hexanes to afford (*S*)-*N*-(3-(*tert*-butyl)-2-hydroxybenzyl)-1-(dimethylamino)-3-methyl-1-oxobutan-2-aminium chloride **2g•HCl** as a white solid (5.30 g, 15.5 mmol, 78% yield based on Boc-Val-NMe<sub>2</sub> **S1**). Crystals suitable for X-ray crystallography were grown by vapor diffusion from a dichloromethane/toluene solvent system. See Part D of the Supplementary Information for the X-ray crystal structure.

**(*S*)-*N*-(3-(*tert*-Butyl)-2-hydroxybenzyl)-1-(dimethylamino)-3-methyl-1-oxobutan-2-aminium (**2g•HCl**; see above):** M.p. = 182–183 °C. IR (neat): 2952 (br, s), 2821 (m), 2733 (m), 1664 (s), 1649 (s), 1548 (m), 1438 (s), 1396 (s), 1373 (m), 1360 (m), 1323 (m), 1285 (m), 1209 (s), 1176 (s), 1139 (m), 1097 (m), 874 (m), 792 (m), 756 (s), 484 (m)  $\text{cm}^{-1}$ ; <sup>1</sup>H NMR (400 MHz,  $\text{CDCl}_3$ ):  $\delta$  10.62 (1H, br s), 8.24 (1H, br s), 7.61 (1H, br s), 7.30 (1H, app dd,  $J = 7.6, 1.6$  Hz), 7.04 (1H, app dd,  $J = 7.6, 1.6$  Hz), 6.85 (1H, t,  $J = 7.6$  Hz), 4.44–4.38 (1H, m), 4.29–4.21 (2H, m), 2.95 (3H, s), 2.86 (3H, s), 2.50–2.44 (1H, m), 1.40 (9H, s), 1.13 (6H, app d,  $J = 7.2$  Hz); <sup>13</sup>C NMR (100 MHz,  $\text{CDCl}_3$ ):  $\delta$  166.9, 155.3, 141.3, 130.1, 129.1, 121.0, 119.9, 61.0, 47.9, 37.6, 36.2, 35.2, 30.3, 30.0, 18.7, 18.5.

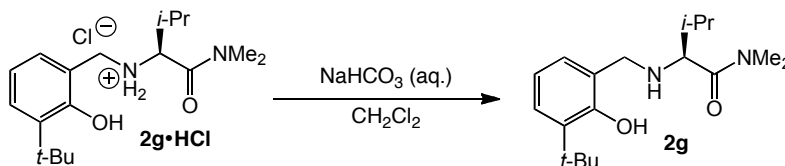

**(S)-2-((3-(*tert*-Butyl)-2-hydroxybenzyl)amino)-*N,N*,3-trimethylbutanamide (2g, Table 1):** The salt **2g**•HCl (5.30 g, 15.5 mmol) is dissolved in 100 mL dichloromethane and deprotonated with 200 mL of a saturated aqueous solution of NaHCO<sub>3</sub>. The layers are separated and the aqueous phase is washed twice with 50 mL dichloromethane. The combined organic phases are dried over anhydrous sodium sulfate, filtered and concentrated under reduced pressure to afford **2g** as white solid (4.45 g, 14.5 mmol, 73% yield based on Boc-Val-NMe<sub>2</sub> **S1**). Crystals suitable for X-ray crystallography were grown by slow evaporation of ethyl acetate. See Part D of the Supplementary Information for the X-ray crystal structure. M.p. = 97–99 °C. IR (neat): 3310 (w), 2943 (w, br), 2872 (w, br), 1638 (s), 1589 (w), 1485 (m), 1459 (m), 1241 (m), 1183 (m), 929 (m), 870 (w), 855 (w), 841(w), 753 (s), 648 (w) cm<sup>-1</sup>; <sup>1</sup>H NMR (400 MHz, CDCl<sub>3</sub>): δ 11.03 (1H, br s), 7.19 (1H, app dd, *J* = 7.0, 1.2 Hz), 6.80–6.75 (1H, m), 6.70 (1H, t, *J* = 7.6 Hz), 4.10 and 3.46 (2H, ABq, *J*<sub>AB</sub> = 13.6 Hz), 3.28 (1H, br s), 3.04 (3H, s), 2.89 (3H, s), 2.65 (1H, br s), 1.90–1.84 (1H, m), 1.42 (9H, s), 0.97 (3H, d, *J* = 6.8 Hz), 0.94 (3H, d, *J* = 6.9 Hz); <sup>13</sup>C NMR (100 MHz, CDCl<sub>3</sub>): δ 173.6, 157.1, 137.1, 126.9, 126.2, 122.9, 118.5, 61.2, 51.5, 37.1, 35.8, 34.8, 31.3, 29.6, 20.1, 18.0; HRMS Calcd for C<sub>18</sub>H<sub>31</sub>N<sub>2</sub>O<sub>2</sub> [M + H]<sup>+</sup>: 307.23855; Found: 307.23736. [α]<sub>D</sub><sup>20</sup> = -37 (*c* = 0.68, CHCl<sub>3</sub>).

**(S)-*N*-Butyl-2-((2-hydroxybenzyl)amino)-3-methylbutanamide (2a, Table 1):** The title compound is prepared according to the representative synthesis of aminophenol **2g** except for the following changes: 1) For the amide formation (step 1), 2.5 equiv. of neat *n*-butylamine is used instead of dimethylamine. 2) For the imine formation (step 3) salicylaldehyde is utilized. 3) The product from the reduction is quenched with a saturated solution of aqueous NaHCO<sub>3</sub> (formation of the HCl salt is omitted) and the aminophenol is then purified by silica gel chromatography (100% dichloromethane to 98:2 dichloromethane:methanol) to afford **2a** as an off-white solid. M.p. = 50–52 °C. IR (neat): 3318 (w), 3294 (w, br), 3255 (w), 2958 (w), 2930 (w, br), 2872 (w), 1628 (s), 1560 (m), 1469 (m), 1387 (w), 1253 (s), 1101 (w), 970 (w), 750 (s), 682 (w, br) cm<sup>-1</sup>; <sup>1</sup>H NMR (400 MHz, CDCl<sub>3</sub>): δ 10.58 (1H, br s), 7.18 (1H, app dt, *J* = 7.9, 1.4 Hz), 6.93 (1H, d, *J* = 7.6 Hz), 6.85 (1H, d, *J* = 8.1 Hz), 6.77 (1H, t, *J* = 7.1 Hz), 5.46 (1H, br s), 4.10 and 3.64 (2H, ABq, *J*<sub>AB</sub> = 13.9 Hz), 3.34 (2H, app. dd, *J* = 13.0, 7.1 Hz), 2.66 (1H, d, *J* = 7.0 Hz), 2.41 (1H, br s), 1.94–1.85 (1H, m), 1.56–1.49 (2H, m), 1.42–1.33 (2H, m), 1.01 (3H, d, *J* = 6.8 Hz), 0.97–0.93 (6H, m); <sup>13</sup>C NMR (100 MHz, CDCl<sub>3</sub>): δ 172.6, 158.1, 129.1, 128.8, 122.4, 119.3, 116.5, 67.5, 51.0, 39.4, 31.9, 31.7, 20.2, 19.8, 19.2, 13.9; HRMS Calcd for C<sub>16</sub>H<sub>27</sub>N<sub>2</sub>O<sub>2</sub> [M + H]<sup>+</sup>: 279.20725; Found: 279.20754. [α]<sub>D</sub><sup>20</sup> = -33 (*c* = 0.55, CHCl<sub>3</sub>).

**(S,*E*)-*N*-Butyl-2-((2-hydroxybenzylidene)amino)-3-methylbutanamide (2b, Table 1):**

This material is synthesized in a manner analogous to aminophenol **2a** except the final reduction step is not performed. The analytical data are fully consistent with those reported previously.<sup>5</sup>

(5) Wen, J.; Zhao, J.; Wang, X.; Dong, J.; You, T. *J. Mol. Cat. A: Chem.*, **2006**, *245*, 242–247.

**(S)-N-(1-(Butylamino)-3-methyl-1-oxobutan-2-yl)-2-hydroxybenzamide (2c, Table 1):**

The title compound is prepared according to the representative synthesis of aminophenol **2a** except after the second step; H<sub>2</sub>N-Val-NH*n*-Bu is treated with salicylic acid under the standard amide formation conditions outlined in the first step. The resulting off-white solid is purified by silica gel chromatography (5:1 hexanes:ethyl acetate) to afford **2c** as a white solid. M.p. = 123–125 °C. IR (neat): 3279 (w), 3090 (w, br), 2930 (m), 1620 (s), 1605 (s), 1547 (s), 1530 (s), 1454 (s), 1371 (m, br), 1229 (m), 756 (s), 643 (m) cm<sup>-1</sup>; <sup>1</sup>H NMR (400 MHz, CDCl<sub>3</sub>): δ 12.07 (1H, s), 7.51 (1H, d, *J* = 8.0 Hz), 7.40–7.36 (1H, m), 7.29 (1H, br s), 6.97 (1H, dd, *J* = 8.4, 0.9 Hz), 6.85–6.81 (1H, m), 6.00 (1H, br s), 4.36 (1H, t, *J* = 7.7 Hz), 3.39–3.30 (1H, m), 3.27–3.19 (1H, m), 2.25–2.17 (1H, m), 1.54–1.47 (2H, m), 1.39–1.30 (2H, m), 1.03 (3H, d, *J* = 3.3 Hz), 1.01 (3H, d, *J* = 3.2 Hz), 0.91 (3H, t, *J* = 7.3 Hz); <sup>13</sup>C NMR (100 MHz, CDCl<sub>3</sub>): δ 170.8, 169.8, 161.4, 134.5, 126.3, 119.0, 118.5, 114.4, 58.9, 39.6, 31.7, 31.6, 20.2, 19.3, 18.7, 13.8; HRMS Calcd for C<sub>16</sub>H<sub>25</sub>N<sub>2</sub>O<sub>3</sub> [M + H]<sup>+</sup>: 293.18652; Found: 293.18532. [α]<sub>D</sub><sup>20</sup> = -34 (*c* = 0.63, CHCl<sub>3</sub>).

**(S)-N-Butyl-2-((3-(tert-butyl)-2-hydroxybenzyl)amino)-3-methylbutanamide (2d, Table 1):**

The title compound is prepared according to the representative synthesis of aminophenol **2g** except for the following changes: 1) For the first amide formation, 2.5 equiv. of neat *n*-butylamine is used instead of dimethylamine. 2) The reduction is quenched with a saturated solution of aqueous NaHCO<sub>3</sub> (formation of the HCl salt is omitted) and the desired product is purified by silica gel chromatography (100% dichloromethane to 98:2 dichloromethane:methanol) to afford **2d** as a white solid. M.p. = 97–99 °C. IR (neat): 3268 (w, br), 3084 (w, br), 2957 (m), 2871 (w), 1644 (s), 1561 (m), 1435 (s), 1259 (s), 835 (m), 784 (m), 750 (s) cm<sup>-1</sup>; <sup>1</sup>H NMR (400 MHz, CDCl<sub>3</sub>): δ 10.83 (1H, br s), 7.21 (1H, app dd, *J* = 7.8, 1.6 Hz), 6.80 (1H, dd, *J* = 7.3, 1.6 Hz), 6.71 (1H, t, *J* = 7.6 Hz), 5.52 (1H, br s), 4.13 and 3.59 (2H, ABq, *J*<sub>AB</sub> = 13.8 Hz), 3.37–3.29 (2H, m), 2.59 (1H, d, *J* = 7.3 Hz), 1.90–1.81 (1H, m), 1.58–1.46 (2H, m), 1.43–1.33 (11H, m), 1.00 (3H, d, *J* = 6.8 Hz), 0.95 (3H, t, *J* = 7.3 Hz), 0.91 (3H, d, *J* = 6.8 Hz); <sup>13</sup>C NMR (100 MHz, CDCl<sub>3</sub>): δ 172.9, 157.1, 137.1, 127.0, 126.3, 122.6, 118.5, 67.0, 51.2, 39.3, 34.8, 31.9, 31.7, 29.6, 20.2, 20.0, 19.1, 13.8; HRMS Calcd for C<sub>20</sub>H<sub>35</sub>N<sub>2</sub>O<sub>2</sub> [M + H]<sup>+</sup>: 335.26985; Found: 335.27112. [α]<sub>D</sub><sup>20</sup> = -68 (*c* = 0.63, CHCl<sub>3</sub>).

**(S)-Ethyl 2-((3-(tert-butyl)-2-hydroxybenzyl)amino)-3-methylbutanoate (2e, Table 1):**

The title compound is prepared according to the representative synthesis of aminophenol **2g** except for the following changes: 1) Initial amide formation carried out with L-Valine methyl ester hydrochloride instead of Boc-Val-OH. 2) The reduction is quenched with a saturated solution of aqueous NaHCO<sub>3</sub> (formation of the HCl salt is omitted) and the desired product is purified by silica gel chromatography (100% hexanes to 30:1 hexanes:diethyl ether) to afford **2e** as a yellow oil. IR (neat): 2960 (m, br), 1728 (s), 1459 (s), 1237 (m), 1186 (s), 1140 (s), 1023 (m), 747 (s) cm<sup>-1</sup>; <sup>1</sup>H NMR (400 MHz, CDCl<sub>3</sub>): δ 10.57 (1H, br s), 7.21 (1H, app dd, *J* = 7.8, 1.7 Hz), 6.84–6.82 (1H, m), 6.72 (1H, t, *J* =

7.6 Hz), 4.28–4.21 (2H, m), 4.08 and 3.66 (2H, ABq,  $J_{AB} = 13.3$  Hz), 3.08 (1H, d,  $J = 4.9$  Hz), 2.27 (1H, br s), 2.04–1.96 (1H, m), 1.41 (9H, s), 1.31 (3H, t,  $J = 7.1$  Hz), 0.99 (6H, app dd,  $J = 10.5, 6.9$  Hz);  $^{13}\text{C}$  NMR (100 MHz,  $\text{CDCl}_3$ ):  $\delta$  174.0, 156.9, 137.1, 127.1, 126.4, 122.8, 118.6, 65.6, 61.0, 51.9, 34.8, 31.5, 29.7, 19.7, 18.3, 14.5; HRMS Calcd for  $\text{C}_{18}\text{H}_{30}\text{NO}_3$   $[\text{M} + \text{H}]^+$ : 308.22257; Found: 308.22291.  $[\alpha]_{\text{D}}^{20} = -42$  ( $c = 0.73$ ,  $\text{CHCl}_3$ ).

**(S)-2-((3-(tert-Butyl)-2-hydroxybenzyl)amino)-3-methyl-1-(pyrrolidin-1-yl)butan-1-one (2f, Table 1):** The title compound is prepared according to the representative synthesis of aminophenol **2g** except for the following changes: 1) For the first step, 2.5 equiv. of neat pyrrolidine is used instead of dimethylamine. 2) For the reduction of the imine in the last step of the synthesis, 20.0 equiv.  $\text{NaBH}_4$  is used. 3) The reduction is quenched with a saturated solution of aqueous  $\text{NaHCO}_3$  (formation of the HCl salt is omitted) and the desired product is purified by silica gel chromatography (hexanes to 5:1 hexanes:ethyl acetate to 3:1 hexanes:ethyl acetate) to afford **2f** as a clear, colorless oil. IR (neat): 3279 (w, br), 2956 (w, br), 2873 (w), 1632 (s), 1424 (s), 1356 (w), 1239 (m), 1184 (w), 1141 (w), 1085 (w), 880 (m), 748 (s), 529 (w);  $^1\text{H}$  NMR (400 MHz,  $\text{CDCl}_3$ ):  $\delta$  11.06 (1H, br s), 7.19 (1H, app dd,  $J = 7.0, 1.2$  Hz), 6.77 (1H, app dd,  $J = 7.3, 1.5$  Hz), 6.69 (1H, t,  $J = 7.5$  Hz), 4.13 (1H, app d,  $J = 13.6$  Hz), 3.66–3.60 (1H, m), 3.53–3.45 (2H, m), 3.28–3.14 (2H, m), 3.05 (1H, d,  $J = 6.7$  Hz), 2.60 (1H, br s), 1.91–1.81 (5H, m), 1.42 (9H, s), 1.00 (3H, d,  $J = 6.7$  Hz), 0.93 (3H, d,  $J = 6.8$  Hz);  $^{13}\text{C}$  NMR (100 MHz,  $\text{CDCl}_3$ ):  $\delta$  172.1, 157.2, 137.1, 126.8, 126.2, 122.9, 118.4, 63.4, 51.3, 46.5, 45.8, 34.8, 31.4, 29.6, 26.2, 24.3, 20.1, 18.5; HRMS Calcd for  $\text{C}_{20}\text{H}_{33}\text{N}_2\text{O}_2$   $[\text{M} + \text{H}]^+$ : 333.25420; Found: 333.25561.  $[\alpha]_{\text{D}}^{20} = -58$  ( $c = 0.58$ ,  $\text{CHCl}_3$ ).

**(S)-2-((3-(tert-Butyl)-2-hydroxybenzyl)amino)-N,N,3,3-tetramethylbutanamide (2h, Table 1):** The title compound is prepared according to the representative synthesis of aminophenol **2g** except for the following changes: 1) Initial amide formation carried out with Boc-Tle-OH instead of Boc-Val-OH. 2) The product from the reduction process is quenched with a saturated solution of aqueous  $\text{NaHCO}_3$  (formation of the HCl salt is omitted) and the desired product is purified by silica gel chromatography (9:1 hexanes:ethyl acetate to 6:1 hexanes:ethyl acetate to 4:1 hexanes:ethyl acetate) to afford **2h** as a white solid. M.p. = 96–98 °C. IR (neat): 2948 (w, br), 1639 (s), 1460 (m), 1433 (m), 1352 (m), 1240 (m), 1135 (m), 878 (m), 782 (m), 751 (s)  $\text{cm}^{-1}$ ;  $^1\text{H}$  NMR (400 MHz,  $\text{CDCl}_3$ ):  $\delta$  10.87 (1H, br s), 7.19 (1H, d,  $J = 7.3$  Hz), 6.77 (1H, d,  $J = 7.3$  Hz), 6.70 (1H, t,  $J = 7.5$ ), 4.09 and 3.40 (2H, ABq,  $J_{AB} = 13.6$  Hz), 3.31 (1H, d,  $J = 11.3$  Hz), 3.03 (3H, s), 2.89 (3H, s), 2.71 (1H, br s), 1.40 (9H, s), 0.96 (9H, s);  $^{13}\text{C}$  NMR (100 MHz,  $\text{CDCl}_3$ ):  $\delta$  173.3, 157.0, 137.2, 126.9, 126.3, 122.9, 118.5, 62.4, 51.3, 38.0, 35.8, 34.8, 34.7, 29.6, 27.0; HRMS Calcd for  $\text{C}_{19}\text{H}_{33}\text{N}_2\text{O}_2$   $[\text{M} + \text{H}]^+$ : 321.25420; Found: 321.25442.  $[\alpha]_{\text{D}}^{20} = -33$  ( $c = 0.93$ ,  $\text{CHCl}_3$ ).



**Chart S1: Supplementary Information Numbering for Aldimine Precursors, Isatins, Homoallylamides, 3-Allyl-3-hydroxy Oxindoles, 3-Allelyl-3-hydroxy Oxindoles, and Homoallylamines**

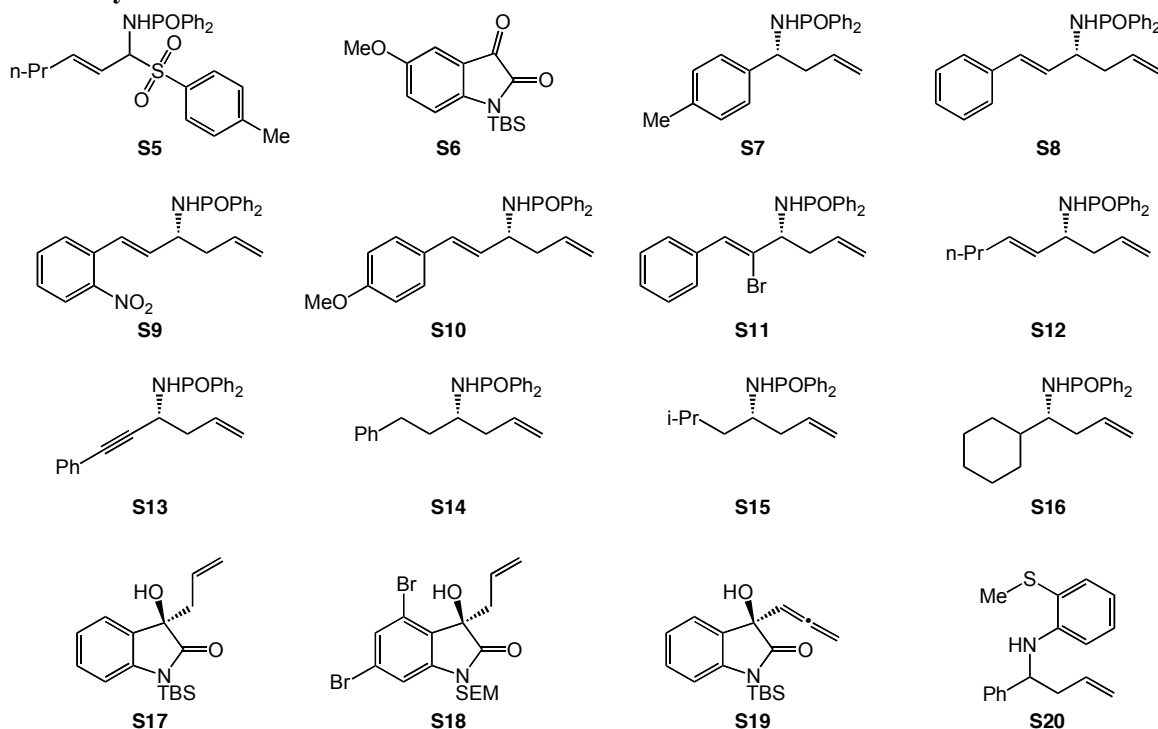

■ **Preparation, Purification, and Analytical Data for Aldimine Substrates:** Aryl-, heteroaryl-, alkenyl-, and alkynyl-substituted *N*-diphenylphosphinoyl imines were synthesized through a  $\text{TiCl}_4$ -promoted reaction between *P,P*-diphenylphosphinic amide<sup>6</sup> and the corresponding aldehyde.<sup>7</sup> Alkyl-substituted aldimines as well as aldimines **3e**, **3g**, **3h** and **6** were synthesized through the intermediacy of the corresponding sulfinyl adducts according to previously disclosed methods.<sup>7b,8</sup> Occasionally, for optimal results, aryl-, heteroaryl-, alkenyl-, and alkynyl-substituted aldimines should be purified by silica gel chromatography (5% triethylamine in the slurry packed bed of silica) shortly before to their use.

**General Procedure for Preparation of Aryl-, Heteroaryl-, Alkenyl-, and Alkynyl Aldimines (3j, Table 2):** Aldimine **3j** was prepared following a modified reported procedure.<sup>7a</sup> A flame-dried 100 mL round-bottom flask, purged with nitrogen, is charged

(6) *P,P*-Diphenylphosphinic amide was routinely synthesized on deca-gram scale according to a previously reported procedure. See: Desrosiers, J-N.; Côté, A.; Boezio, A. A.; Charette, A. B. *Org. Syn.* **2006**, *83*, 8–9.

(7) (a) Jennings, W. B.; Lovely, C. J. *Tetrahedron* **1991**, *47*, 5561–5568. (b) Yamada, K-i.; Harwood, S. J.; Gröger, H.; Shibasaki, M. *Angew. Chem., Int. Ed.* **1999**, *38*, 3504–3506.

(8) (a) Côté, A.; Boezio, A. A.; Charette, A. B. *Proc. Natl. Acad. Sci.* **2004**, *101*, 5405–5410. (b) Yamaguchi, A.; Matsunaga, S.; Shibasaki, M. *Tetrahedron Lett.* **2006**, *47*, 3985–3989.

with 4-(dibutylamino) benzaldehyde <sup>9</sup> (5.51 g, 23.6 mmol, 1.25 equiv.), *P,P*-diphenylphosphinic amide (4.10 g, 18.9 mmol, 1.00 equiv.), triethylamine (10.6 mL, 75.6 mmol, 4.00 equiv.), and dichloromethane (60 mL). The resulting mixture is allowed to cool to  $-78\text{ }^{\circ}\text{C}$ , followed by the drop-wise addition of neat  $\text{TiCl}_4$  (1.14 mL, 10.4 mmol, 0.55 equiv.). The solution is allowed to stir for 12 h at  $22\text{ }^{\circ}\text{C}$  and is then filtered through a plug of Celite. The resulting yellow solid is purified by silica gel column chromatography (ethyl acetate:hexanes 2:1 followed by 100% ethyl acetate as eluent) and recrystallized from dichloromethane/hexanes to afford **3j** as pale yellow solid (6.40 g, 14.8 mmol, 78% yield).

**(*E*)-*N*-(4-(dibutylamino)benzylidene)-*P,P*-diphenylphosphinic amide (**3j**, Table 2):** M.p. =  $113\text{--}115\text{ }^{\circ}\text{C}$ . IR (neat): 2951 (w), 2928 (w), 2869 (w), 1579 (m), 1525 (m), 1435 (m), 1364 (m), 1203 (m), 1173 (m), 1104 (m), 831 (s), 807 (m), 725 (m), 695 (s), 580 (m), 545 (s), 522 (s), 510 (s)  $\text{cm}^{-1}$ ;  $^1\text{H}$  NMR (400 MHz,  $\text{CDCl}_3$ ):  $\delta$  9.08 (1H, d,  $J = 32.0$  Hz), 7.95–7.89 (4H, m), 7.85 (2H, d,  $J = 8.8$  Hz), 7.48–7.38 (6H, m), 6.65 (2H, d,  $J = 9.2$  Hz), 3.34 (4H, dd,  $J = 7.6, 7.2$  Hz), 1.63–1.56 (4H, m), 1.37 (4H, app sextet,  $J = 7.6$  Hz), 0.97 (6H, t,  $J = 7.2$  Hz);  $^{13}\text{C}$  NMR (100 MHz,  $\text{CDCl}_3$ ):  $\delta$  172.1 (d,  $J = 6.9$  Hz), 152.3, 134.4 (d,  $J = 126.0$  Hz), 132.7 (br peak as the result of hindered rotation around the (Ar)–(C=NR) bond), 131.7 (d,  $J = 9.1$  Hz), 131.4 (d,  $J = 2.7$  Hz), 128.4 (d,  $J = 12.3$  Hz), 123.5 (d,  $J = 26.2$  Hz), 111.0, 51.0, 29.4, 20.4, 14.1; HRMS Calcd for  $\text{C}_{27}\text{H}_{34}\text{N}_2\text{OP}$   $[\text{M} + \text{H}]^+$ : 433.24087; Found: 433.23945.

**(*E*)-*N*-((*E*)-3-(2-Nitrophenyl)allylidene)-*P,P*-diphenylphosphinic amide (**5b**, Table 3):** White solid. M.p. =  $148\text{--}149\text{ }^{\circ}\text{C}$ . IR (neat): 3076 (w), 3041 (w), 2856 (w), 1625 (m), 1608 (m), 1591 (m), 1520 (m), 1437 (w), 1344 (m), 1205 (s), 1157 (w), 1124 (m), 1108 (m), 966 (w), 874 (m), 845 (m), 798 (s), 784 (m), 752 (w), 741 (w), 725 (s), 693 (s), 676 (m), 577 (w), 547 (s)  $\text{cm}^{-1}$ ;  $^1\text{H}$  NMR (400 MHz,  $\text{CDCl}_3$ ):  $\delta$  9.09 (1H, dd,  $J = 31.6, 8.8$  Hz), 8.06 (1H, d,  $J = 8.4$  Hz), 7.94–7.86 (5H, m), 7.70 (1H, t,  $J = 8.0$  Hz), 7.67 (1H, t,  $J = 7.6$  Hz), 7.58–7.42 (7H, m), 7.02 (1H, ddd,  $J = 15.6, 8.8, 1.6$  Hz);  $^{13}\text{C}$  NMR (100 MHz,  $\text{CDCl}_3$ ):  $\delta$  174.1 (d,  $J = 7.9$  Hz), 148.1, 145.0, 133.8, 133.0 (d,  $J = 28.6$  Hz), 132.5 (d,  $J = 126.0$  Hz), 132.1 (d,  $J = 2.8$  Hz), 131.7 (d,  $J = 9.3$  Hz), 130.8, 130.7 (d,  $J = 1.4$  Hz), 129.0, 128.7 (d,  $J = 12.6$  Hz), 125.3; HRMS Calcd for  $\text{C}_{21}\text{H}_{18}\text{N}_2\text{O}_3\text{P}$   $[\text{M} + \text{H}]^+$ : 377.10550; Found: 377.10545.

**(*E*)-*N*-((*E*)-3-(4-Methoxyphenyl)allylidene)-*P,P*-diphenylphosphinic amide (**5c**, Table 3):** Pale yellow solid. M.p. =  $150\text{--}151\text{ }^{\circ}\text{C}$ . IR (neat): 3064 (w), 3053 (w), 3014 (w), 2939 (w), 2844 (w), 1619 (m), 1586 (s), 1568 (s), 1513 (m), 1436 (m), 1311 (m), 1258 (s), 1203 (s), 1180 (m), 1160 (m), 1123 (m), 1106 (m), 1023 (m), 875 (m), 818 (s), 753 (m), 723 (m), 696 (s), 595 (m), 546 (s)  $\text{cm}^{-1}$ ;  $^1\text{H}$  NMR (400 MHz,  $\text{CDCl}_3$ ):  $\delta$  9.01 (1H, dd,  $J = 31.6, 8.8$  Hz), 7.91–7.86 (4H, m), 7.53–7.42 (8H, m), 7.33 (1H, d,  $J = 15.6$  Hz), 7.00 (1H, ddd,  $J$

(9) Tian, L.; Hu, Z.; Shi, P.; Zhou, H.; Wu, J.; Tian, Y.; Zhou, Y.; Tao, X.; Jiang, M. *J. Lumin.* **2007**, *127*, 423–430

= 15.6, 9.2, 2.0 Hz), 6.93 (2H, d,  $J = 8.4$  Hz), 3.85 (3H, s);  $^{13}\text{C}$  NMR (100 MHz,  $\text{CDCl}_3$ ):  $\delta$  175.1 (d,  $J = 7.7$  Hz), 162.0, 150.7, 133.3 (d,  $J = 126.0$  Hz), 131.8 (d,  $J = 2.8$  Hz), 131.7 (d,  $J = 9.1$  Hz), 130.2, 128.6 (d,  $J = 12.5$  Hz), 127.6 (d,  $J = 1.2$  Hz), 126.7 (d,  $J = 28.5$  Hz), 114.6, 55.6; HRMS Calcd for  $\text{C}_{22}\text{H}_{21}\text{NO}_2\text{P}$   $[\text{M} + \text{H}]^+$ : 362.13099; Found: 362.12964.

**(*E*)-*N*-((*Z*)-2-Bromo-3-phenylallylidene)-*P,P*-diphenylphosphinic amide (5d, Table 3):** White solid. M.p. = 144–145 °C. IR (neat): 3074 (w), 3061 (w), 3025 (w), 3012 (w), 2958 (w), 1620 (m), 1593 (s), 1569 (m), 1438 (m), 1199 (s), 1160 (w), 1134 (m), 1122 (s), 1106 (m), 1070 (w), 877 (s), 808 (m), 752 (m), 726 (s), 702 (s), 684 (s), 659 (m), 587 (m), 550 (s), 517 (m), 501 (s), 468 (m)  $\text{cm}^{-1}$ ;  $^1\text{H}$  NMR (400 MHz,  $\text{CDCl}_3$ ):  $\delta$  8.86 (1H, d,  $J = 29.2$  Hz), 7.99–7.93 (6H, m), 7.78 (1H, s), 7.53–7.43 (9H, m);  $^{13}\text{C}$  NMR (100 MHz,  $\text{CDCl}_3$ ):  $\delta$  171.3 (d,  $J = 5.2$  Hz), 148.2, 133.8, 132.9 (d,  $J = 127.0$  Hz), 132.0 (d,  $J = 2.8$  Hz), 131.7 (d,  $J = 9.3$  Hz), 131.1, 130.9, 128.7, 128.7 (d,  $J = 11.5$  Hz), 124.1 (d,  $J = 31.6$  Hz); HRMS Calcd for  $\text{C}_{21}\text{H}_{18}\text{BrNOP}$   $[\text{M} + \text{H}]^+$ : 410.03094; Found: 410.02999.

**(*E*)-*P,P*-Diphenyl-*N*-(1-tosylhex-2-en-1-yl)phosphinic amide (S5, not shown in manuscript, see Chart S1):** The title compound is synthesized following a previously reported procedure<sup>7</sup> from *P,P*-diphenylphosphinic amide (2.17 g, 10.0 mmol, 1.00 equiv.), (*E*)-hex-2-enal (2.31 mL, 20.0 mmol, 2.00 equiv.), and *p*-toluenesulfinic acid<sup>10</sup> (2.34 g, 15.0 mmol, 1.50 equiv.) to obtain **S5** as white solid (3.22 g, 7.10 mmol, 71% yield). M.p. = 138–139 °C. IR (neat): 3177 (w, br), 2959 (w), 2933 (w), 2870 (w), 1661 (m), 1596 (w), 1437 (m), 1300 (m), 1281 (m), 1214 (m), 1185 (s), 1170 (m), 1138 (m), 1125 (s), 1106 (m), 1083 (m), 955 (m), 894 (m), 752 (m), 726 (s), 693 (s), 662 (m), 583 (s), 568 (m), 536 (s)  $\text{cm}^{-1}$ ;  $^1\text{H}$  NMR (400 MHz,  $\text{CDCl}_3$ ):  $\delta$  7.79–7.71 (4H, m), 7.59 (2H, d,  $J = 8.4$  Hz), 7.59–7.54 (2H, m), 7.50–7.43 (4H, m), 7.23 (2H, d,  $J = 8.0$  Hz), 5.90 (1H, ddd,  $J = 13.6, 11.6, 9.6$  Hz), 5.31 (1H, t,  $J = 10.0$  Hz), 4.73 (1H, dd,  $J = 14.0, 10.4$  Hz), 3.28 (1H, app td,  $J = 10.8, 3.6$  Hz), 2.42 (3H, s), 1.97–1.88 (1H, m), 1.52–1.32 (2H, m), 1.20–1.10 (1H, m), 0.82 (3H, t,  $J = 7.2$  Hz);  $^{13}\text{C}$  NMR (100 MHz,  $\text{CDCl}_3$ ):  $\delta$  144.3, 134.7, 132.8, 132.6 (d,  $J = 2.9$  Hz), 132.5 (d,  $J = 2.9$  Hz), 132.2 (d,  $J = 10.1$  Hz), 131.9 (d,  $J = 10.1$  Hz), 131.4 (d,  $J = 128.0$  Hz), 131.1 (d,  $J = 128.0$  Hz), 129.6, 129.2, 128.9 (d,  $J = 12.9$  Hz), 128.9 (d,  $J = 13.0$  Hz), 101.9 (d,  $J = 9.9$  Hz), 67.6, 29.7, 21.8, 20.0, 13.7.

**(*E*)-*N*-((*E*)-Hex-2-en-1-ylidene)-*P,P*-diphenylphosphinic amide (6, Table 3):** Following a modification to a previously reported procedure,<sup>7b</sup> **6** is synthesized through vigorous stirring of a suspension of sulfinic adduct **S5** (see above, 150 mg, 0.330 mmol) in 5 mL of diethyl ether and 5 mL of an aqueous saturated solution of  $\text{Na}_2\text{CO}_3$  until the white solid dissolves completely (~8 h). The layers are separated and the aqueous phase is washed with diethyl ether. The combined organic phases are dried with anhydrous sodium sulfate and the filtrate is concentrated to dryness. The residue is dissolved again in dichloromethane, filtered, and the solvent is evaporated to afford **6** as colorless viscous oil (97.7 mg, 0.328 mmol, 99% yield). IR (neat): 3056 (w), 2959 (w), 2930 (w), 2871 (w), 1637 (m), 1596 (s),

(10) Sisko, J.; Mellinger, M.; Sheldrake, P. W.; Baine, N. H. *Org. Syn.* **2000**, 77, 198–205.

1203 (s), 1122 (m), 1106 (m), 826 (s), 724 (s), 693 (s), 571 (m), 544 (s)  $\text{cm}^{-1}$ ;  $^1\text{H}$  NMR (400 MHz,  $\text{CDCl}_3$ ):  $\delta$  8.86 (1H, dd,  $J = 32.4, 8.8$  Hz), 7.89–7.83 (4H, m), 7.50–7.41 (6H, m), 6.73 (1H, dt,  $J = 15.6, 6.8$  Hz), 6.50–6.42 (1H, m), 2.30 (2H, app quartet,  $J = 7.2$  Hz), 1.53 (2H, app sextet,  $J = 7.2$  Hz), 0.95 (3H, t,  $J = 7.2$  Hz);  $^{13}\text{C}$  NMR (100 MHz,  $\text{CDCl}_3$ ):  $\delta$  175.5 (d,  $J = 8.0$  Hz), 156.7, 133.1 (d,  $J = 126.0$  Hz), 132.3 (d,  $J = 26.8$  Hz), 131.8 (d,  $J = 2.8$  Hz), 131.6 (d,  $J = 9.1$  Hz), 128.5 (d,  $J = 12.4$  Hz), 35.2, 21.4, 13.8; HRMS Calcd for  $\text{C}_{18}\text{H}_{21}\text{NOP}$   $[\text{M} + \text{H}]^+$ : 298.13608; Found: 298.13599.

### ■ Preparation, Purification, and Analytical Data for Isatin Substrates

*General Procedure for Preparation of N-tert-Butyldimethylsilyl Isatins:* In a 250 mL flame dried round bottom flask equipped with a stir bar, *tert*-butyldimethylsilyl chloride (4.5 g, 30 mmol) is dissolved in 150 mL dichloromethane. To this solution, in a single portion, isatin (2.2 g, 15 mmol) and 4-dimethylaminopyridine (0.18 g, 1.5 mmol) are added. The flask is sealed with a rubber septum and purged with nitrogen. Triethylamine (6.3 mL, 45 mmol) is added in one portion through a syringe and mixture is allowed to stir for 24 h at 22 °C. The volatiles are removed *in vacuo* and the resultant dark orange solid is purified by silica gel chromatography (hexanes to 1:1 hexanes:dichloromethane to dichloromethane) to afford an orange solid, which is recrystallized from hot EtOH (details below) to afford **14a** (2.6 g, 9.9 mmol, 67% yield) as an orange crystalline solid. Please note that for long-term storage, *N-tert*-butyldimethylsilyl protected isatins should be kept under an inert atmosphere at –15 °C. **1-(tert-Butyldimethylsilyl)indoline-2,3-dione (14a, Figure 5):** M.p. = 123–124 °C. IR (neat): 2929 (w), 2853 (w), 1731 (s), 1603 (m), 1589 (m), 1463 (m), 1325 (m), 1252 (m), 1170 (m), 1139 (m), 927 (m), 835 (s), 796 (m), 752 (s), 686 (m), 466 (m), 424 (m)  $\text{cm}^{-1}$ ;  $^1\text{H}$  NMR (400 MHz,  $\text{CDCl}_3$ ):  $\delta$  7.63–7.61 (1H, m), 7.53–7.49 (1H, m), 7.10–7.03 (2H, m), 1.02 (9H, s), 0.56 (6H, s);  $^{13}\text{C}$  NMR (100 MHz,  $\text{CDCl}_3$ ):  $\delta$  184.2, 164.9, 155.4, 138.3, 125.6, 123.4, 120.0, 115.1, 26.4, 19.7, –3.3; HRMS Calcd for  $\text{C}_{14}\text{H}_{20}\text{NO}_2\text{Si}$   $[\text{M} + \text{H}]^+$ : 262.12633; Found: 262.12608.

**1-(tert-Butyldimethylsilyl)-5-methoxyindoline-2,3-dione (S6, not shown in the manuscript, see Chart S1):** Crimson crystalline solid. M.p. = 169–171 °C. IR (neat): 2929 (w, br), 2859 (w), 1731 (s), 1625 (w), 1589 (w), 1492 (m), 1310 (m), 1270 (m), 1142 (m), 942 (w), 847 (m)  $\text{cm}^{-1}$ ;  $^1\text{H}$  NMR (400 MHz,  $\text{CDCl}_3$ ):  $\delta$  7.12–7.07 (2H, m), 6.96 (1H, d,  $J = 9.0$  Hz), 3.79 (3H, s), 1.01 (9H, s), 0.54 (6H, s);  $^{13}\text{C}$  NMR (100 MHz,  $\text{CDCl}_3$ ):  $\delta$  184.7, 165.3, 156.0, 149.5, 125.6, 120.4, 116.0, 108.8, 56.0, 26.5, 19.8, –3.3; HRMS Calcd for  $\text{C}_{15}\text{H}_{22}\text{NO}_3\text{Si}$   $[\text{M} + \text{H}]^+$ : 292.13689; Found: 292.13766.

**4,6-Dibromo-1-((2-(trimethylsilyl)ethoxy)methyl)indoline-2,3-dione (14b, not shown in the manuscript, see Chart S1):** Amide protection performed in accordance to a previously disclosed procedure.<sup>11</sup> Yellow crystalline solid, M.p. = 142–143 °C. IR (neat): 3077 (w), 2896 (w), 1742 (m), 1595 (s), 1562 (m), 1419 (w), 1244 (m), 1073 (s), 1024 (m),

(11) Trost, B. M.; Frederiksen, M. U. *Angew. Chem., Int. Ed.* **2005**, *44*, 308–310.

839 (s), 733 (m), 456 (m)  $\text{cm}^{-1}$ ;  $^1\text{H}$  NMR (400 MHz,  $\text{CDCl}_3$ ):  $\delta$  7.51 (1H, d,  $J = 1.6$  Hz), 7.28 (1H, d,  $J = 1.2$  Hz), 5.16 (2H, s), 3.85 (2H, m), 0.94 (2H, m),  $-0.01$  (9H, s);  $^{13}\text{C}$  NMR (100 MHz,  $\text{CDCl}_3$ ):  $\delta$  179.5, 157.2, 152.2, 133.5, 131.5, 122.1, 115.3, 114.3, 70.0, 67.1, 17.9,  $-1.3$ ; HRMS Calcd for  $\text{C}_{14}\text{H}_{21}\text{Br}_2\text{N}_2\text{O}_3\text{Si}$   $[\text{M} + \text{NH}_4]^+$ : 450.96882; Found: 450.96873.

*Synthesis of N-Bn Isatins*: Synthesized in accordance to a published procedure<sup>12</sup> with the following modification: After isolation of the unpurified *N*-protected isatin, a small portion (~10 mg) of the solid is passed through a small plug of silica gel using dichloromethane as the elutant. If a dark (usually maroon) residue remains on the silica gel after the *N*-protected isatin is eluted, then the entire unpurified *N*-Bn isatin is dissolved in dichloromethane and passed through a short plug of silica gel using dichloromethane as an elutant. After concentration *in vacuo*, the isatin is purified as described below.

*Purification of N-Bn, N-SEM, and N-TBS isatins*: With hot EtOH as the solvent, ~95 % of the resulting solid is dissolved and filtered while hot through a fritted glass funnel (this initial filtration is critical to obtain *N*-protected isatins of sufficient purity). The filtered solids are discarded. The filtrate is allowed to cool to room temperature during which time the desired product crystallizes from solution. The desired product is collected by filtration through a fritted glass funnel. Concentrating the mother liquor *in vacuo* and recrystallization of the resultant solids from hot EtOH yields additional product. The products are then dried azeotropically with anhydrous benzene prior to use.

■ **Procedure for *Gram-Scale* Catalytic Enantioselective Allyl Addition to Aldimine **3a** to Afford Homoallylamide **4a** (Figure 4a):**

*Preparation of the catalyst suspension*: Aminophenol **2g** (15.0 mg, 0.0490 mmol) is weighed out in air into a 4 mL vial to which is added 263  $\mu\text{L}$  of a solution of sodium hydroxide (1.95 mg, 0.0490 mmol) in reagent-grade methanol [111 mg NaOH pellet (Fisher) is dissolved in 15 ml methanol]. After removal of the solvent *in vacuo*, the resultant white oil is azeotropically dried with reagent grade toluene. The obtained white solid is allowed to dry at 0.5 Torr for 30 min and the vial is sealed with a cap containing a teflon septum. Toluene (1.0 mL) is added to yield a suspension after sonication (2 min).

A round bottom flask (50 mL, equipped with a magnetic stirring bar) is charged with imine **3a** (1.00 g, 3.28 mmol) and dried at 0.5 Torr for 30 min, purged with nitrogen and sealed with a rubber septum. Toluene (30 mL) is added, followed by allylboronic acid pinacol ester **1a** (800  $\mu\text{L}$ , 4.26 mmol) from a septum-sealed bottle (Frontier Scientific, Inc., as received) and methanol (200  $\mu\text{L}$ , 4.92 mmol) from a septum-sealed bottle (Acros, grade: 99.9% ExtraDry, as received). A suspension of the catalyst containing aminophenol **2g** (10.1 mg, 33  $\mu\text{mol}$ , 0.0100 equiv.) and sodium hydroxide (1.31 mg, 33  $\mu\text{mol}$ , 0.0100 equiv.) in 0.67 mL toluene is added with a syringe to the mixture (see below). After two h,

(12) Karimi, A. R.; Sedaghatpour, F. *Synthesis* **2010**, *10*, 1731–1735.

the solvent is evaporated and the residue is taken up in 30 mL hexanes. The suspension is allowed to sonicate for two min, filtered and washed with hexanes (4 x 3 mL). The desired product, dried under vacuum, is obtained in 97.5:2.5 er (1.04 g, 3.01 mmol, 92% yield). Elemental analysis for C<sub>22</sub>H<sub>22</sub>NOP: Calcd: C, 76.06; H, 6.38; N, 4.03. Found: C, 75.77; H, 6.43; N 3.98.

**(R)-P,P-Diphenyl-N-(1-phenylbut-3-en-1-yl)phosphinic amide (4a, Table 2):** The analytical data are fully consistent with those reported previously.<sup>13</sup> <sup>1</sup>H NMR (400 MHz, CDCl<sub>3</sub>): δ 7.89–7.84 (2H, m), 7.79–7.74 (2H, m), 7.51–7.47 (1H, m), 7.45–7.41 (3H, m), 7.34–7.18 (7H, m), 5.61 (1H, dddd, *J* = 17.2, 10.0, 7.2, 7.2 Hz), 5.11–5.03 (2H, m), 4.47 (1H, dddd, *J* = 10.4, 10.4, 6.4, 6.4 Hz), 3.35 (1H, br dd, *J* = 9.6, 6.0 Hz), 2.74–2.60 (2H, m); HRMS Calcd for C<sub>22</sub>H<sub>23</sub>NOP [M + H]<sup>+</sup>: 348.15173; Found: 348.15251; [α]<sub>D</sub><sup>20</sup> = +52 (*c* = 0.40, CHCl<sub>3</sub>) for a 96:4 er sample. The enantiomeric purity was determined by HPLC analysis in comparison with authentic racemic material (Chiracel OD, 92:8 hexanes:*i*-PrOH, 0.5 mL/min, 220 nm): *t*<sub>R</sub> of **4a**: 16 min (major) and 21 min (minor).

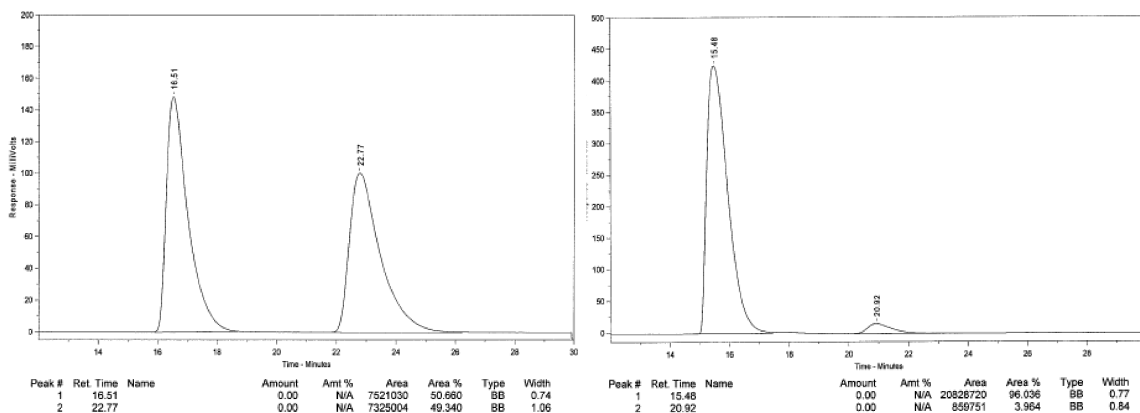

| Peak # | Ret. Time | Area % | Peak # | Ret. Time | Area % |
|--------|-----------|--------|--------|-----------|--------|
| 1      | 16.5 min  | 50.660 | 1      | 15.5 min  | 96.036 |
| 2      | 22.8 min  | 49.340 | 2      | 20.9 min  | 3.964  |

■ **Representative Procedure for *Small Scale* Catalytic Enantioselective Allyl Additions to Aryl-, Heteroaryl-, Alkenyl-, and Alkynyl *N*-Diphenylphosphinoyl Imines (Table 3):** In a nitrogen-filled glovebox (not needed for gram scale; only used when reactions are performed at mg scale to achieve highly reproducible data), aminophenol **2g** (6.9 mg, 0.023 mmol) is added to an oven-dried two dram vial equipped with a stir bar followed by 1.5 mL of a stock solution of NaO*t*-Bu in toluene (9.6 mg, 0.10 mmol/8.0 mL) and the solution is allowed to stir at 22 °C for ~10 minutes. A separate vial equipped with a stir bar is charged sequentially with aldimine **3b** (32.3 mg, 0.100 mmol), 800. μL of toluene, MeOH (10. μL, 0.25 mmol), and allylboronic acid pinacol ester **1a** (28 μL, 0.15 mmol) under nitrogen. To this mixture is added 200. μL of the **2g**/NaO*t*-Bu

solution and a cap is attached to the vial and sealed (electrical tape). The clear and colorless solution is allowed to stir at 22 °C for four hours during which time the solution becomes cloudy and white. The cap is removed and 3 mL of a solution of saturated aqueous NaIO<sub>4</sub> is added and the biphasic mixture is allowed to stir for 20 minutes. The aqueous layer is washed with ethyl acetate (4 x 4 mL), dried over Na<sub>2</sub>SO<sub>4</sub>, and concentrated *in vacuo* to yield a pale yellow solid. The homoallylamide product is purified by silica gel chromatography (10 mm diameter column slurry packed with 2.5 g of silica gel in 95:5 hexanes:triethylamine and eluted with 10 mL hexanes, 10 mL 3:1 hexanes:ethyl acetate, 10 mL 1:1 hexanes:ethyl acetate, 10 mL 1:3 hexanes:ethyl acetate, and 15 mL ethyl acetate) to afford **4b** (35.2 mg, 0.0960 mmol, 96% yield) as a white solid.

**(R)-N-(1-(2-Fluorophenyl)but-3-en-1-yl)-P,P-diphenylphosphinic amide (4b, Table 2):**

The analytical data are fully consistent with those reported previously.<sup>13</sup> <sup>1</sup>H NMR (400 MHz, CDCl<sub>3</sub>): δ 7.87–7.82 (2H, m), 7.78–7.72 (2H, m), 7.51–7.47 (1H, m), 7.44–7.39 (3H, m), 7.34–7.29 (2H, m), 7.23–7.18 (1H, m), 7.15 (1H, ddd, *J* = 7.6, 7.6, 1.6 Hz), 7.05 (1H, ddd, *J* = 7.6, 7.6, 1.2 Hz), 6.97 (1H, ddd, *J* = 10.8, 8.0, 0.8 Hz), 5.61 (1H, dddd, *J* = 17.2, 10.0, 7.2, 7.2 Hz), 5.09–5.01 (2H, m), 4.47 (1H, dddd, *J* = 10.4, 10.4, 6.4, 6.4 Hz), 3.56 (1H, br dd, *J* = 10.4, 6.8 Hz), 2.78–2.60 (2H, m); HRMS Calcd for C<sub>22</sub>H<sub>21</sub>FNOP [M + H]<sup>+</sup>: 366.14230; Found: 366.14250. [α]<sub>D</sub><sup>20</sup> = +34 (*c* = 0.39, CHCl<sub>3</sub>) for a 98.5:1.5 er sample. The enantiomeric purity was determined by HPLC analysis in comparison to authentic racemic material (Chiracel OD, 92:8 hexanes:*i*-PrOH, 0.5 mL/min, 220 nm) *t*<sub>R</sub> of **4b**: 17 min (major) and 21 min (minor).

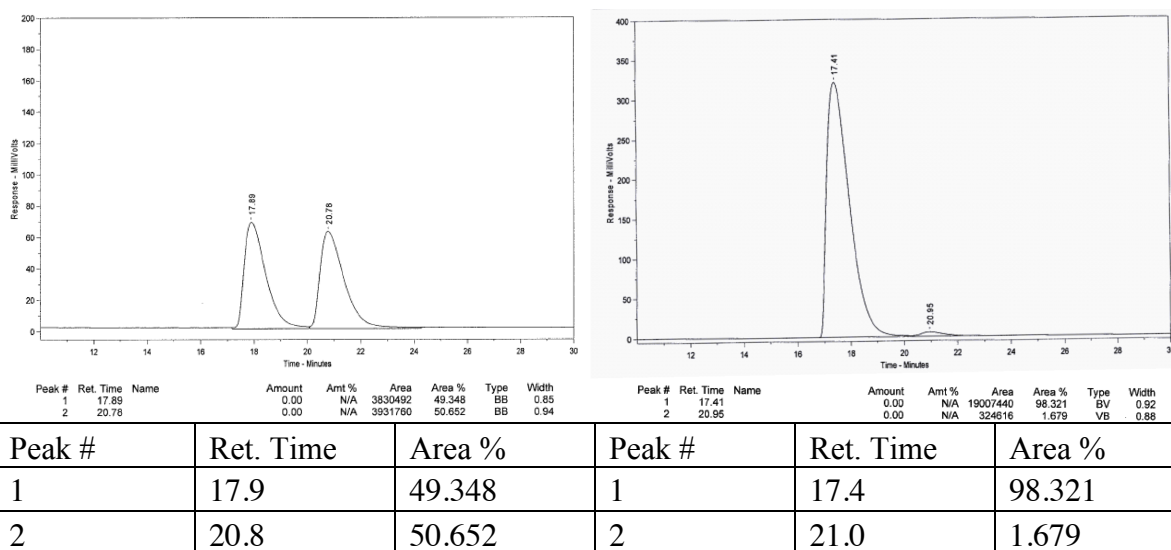

**(R)-N-(1-(2-Bromophenyl)but-3-en-1-yl)-P,P-diphenylphosphinic amide (4c, Table 2):**

The title compound is purified in a manner identical to **4b** affording **4c** (38.0 mg, 0.0891 mmol, 89% yield) as a white solid. The analytical data are fully consistent with those reported previously.<sup>13</sup> <sup>1</sup>H NMR (400 MHz, CDCl<sub>3</sub>): δ 7.87–7.82 (2H, m), 7.75–7.70 (2H, m), 7.51–7.47 (1H, m), 7.44–7.39 (4H, m), 7.35–7.27 (4H, m), 7.07 (1H, ddd, *J* = 8.8, 8.0, 2.0 Hz), 5.64 (1H, dddd, *J* = 17.4, 10.4, 7.2, 7.2 Hz), 5.14–5.10 (2H, m), 4.71 (1H, dddd, *J*

= 10.4, 10.4, 6.0, 6.0 Hz), 3.56 (1H, br dd,  $J = 9.6, 6.0$  Hz), 2.64 (2H, app t,  $J = 6.4$  Hz); HRMS Calcd for  $C_{22}H_{22}BrNOP$   $[M + H]^+$ : 426.06224; Found: 426.06229.  $[\alpha]^{20}_D = +2.30$  ( $c = 1.00, CHCl_3$ ) for a 98.0:2.0 er sample. The enantiomeric purity was determined by HPLC analysis in comparison to authentic racemic material (Chiracel AD-H, 87:13 hexanes:*i*-PrOH, 0.5 mL/min, 220 nm)  $t_R$  of **4c**: 26 min (minor) and 45 min (major).

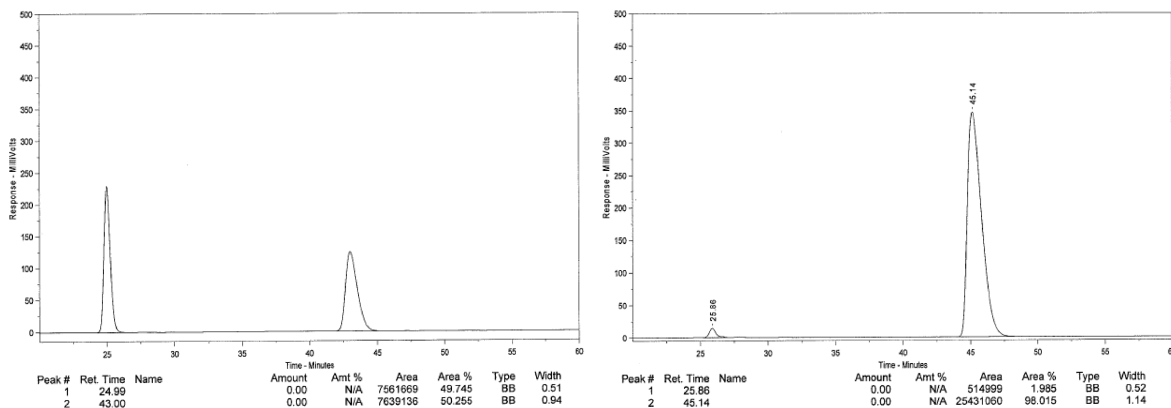

| Peak # | Ret. Time | Area % | Peak # | Ret. Time | Area % |
|--------|-----------|--------|--------|-----------|--------|
| 1      | 25.0      | 49.745 | 1      | 25.9      | 1.985  |
| 2      | 43.0      | 50.255 | 2      | 45.1      | 98.015 |

**(R)-P,P-Diphenyl-N-(1-(*o*-tolyl)but-3-en-1-yl)phosphinic amide (4d, Table 2):** The title compound is synthesized and purified analogously to **4b** (six h reaction time) affording **4d** (34.3 mg, 0.0949 mmol, 95% yield) as a white solid. The analytical data are fully consistent with those reported previously.<sup>13</sup>  $^1H$  NMR (400 MHz,  $CDCl_3$ ):  $\delta$  7.88–7.83 (2H, m), 7.72–7.67 (2H, m), 7.50–7.46 (1H, m), 7.44–7.38 (3H, m), 7.33 (1H, d,  $J = 7.7$  Hz), 7.29–7.21 (3H, m), 7.12 (1H, ddd,  $J = 8.4, 7.6, 1.6$  Hz), 7.00 (1H, d,  $J = 7.5$  Hz), 5.61 (1H, dddd,  $J = 17.2, 10.0, 7.2, 7.2$  Hz), 5.11–5.03 (2H, m), 4.54 (1H, dddd,  $J = 10.0, 10.0, 6.4, 6.4$  Hz), 3.43 (1H, br dd,  $J = 9.6, 6.4$  Hz), 2.65–2.52 (2H, m), 1.91 (3H, s); HRMS Calcd for  $C_{23}H_{25}NOP$   $[M + H]^+$ : 362.16738; Found: 362.16744.  $[\alpha]^{20}_D = +7.20$  ( $c = 1.00, CHCl_3$ ) for a 94:6 er sample. The enantiomeric purity was determined by HPLC analysis in comparison to authentic racemic material (Chiracel AD-H, 87:13 hexanes:*i*-PrOH, 0.5 mL/min, 220 nm)  $t_R$  of **4d**: 25 min (major) and 31 min (minor).



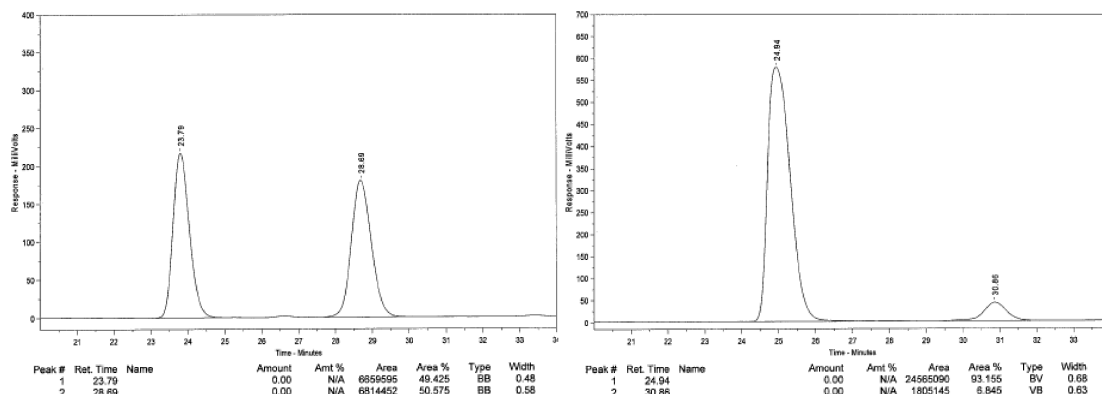

| Peak # | Ret. Time | Area % | Peak # | Ret. Time | Area % |
|--------|-----------|--------|--------|-----------|--------|
| 1      | 23.8      | 49.425 | 1      | 24.9      | 93.155 |
| 2      | 28.7      | 50.575 | 2      | 30.9      | 6.845  |

**(R)-N-(1-(3-Bromophenyl)but-3-en-1-yl)-P,P-diphenylphosphinic amide (4e, Table 2):** The title compound is purified identically to **4b** affording **4e** (39.5 mg, 0.0927 mmol, 93% yield) as a white solid. The analytical data are fully consistent with those reported previously.<sup>13</sup> <sup>1</sup>H NMR (400 MHz, CDCl<sub>3</sub>): δ 7.87–7.82 (2H, m), 7.77–7.71 (2H, m), 7.53–7.47 (1H, m), 7.45–7.40 (3H, m), 7.35–7.30 (4H, m), 7.13–7.11 (2H, m), 5.58 (1H, dddd, *J* = 17.2, 10.0, 7.2, 7.2 Hz), 5.13–5.07 (2H, m), 4.31 (1H, dddd, *J* = 10.0, 10.0, 6.4, 6.4 Hz), 3.42 (1H, br dd, *J* = 9.4, 6.0 Hz), 2.67–2.58 (2H, m); HRMS Calcd for C<sub>22</sub>H<sub>22</sub>BrNOP [M + H]<sup>+</sup>: 426.06224; Found: 426.06326. [α]<sub>D</sub><sup>20</sup> = +59 (*c* = 0.57, CHCl<sub>3</sub>) for a 97.5:2.5 er sample. The enantiomeric purity was determined by HPLC analysis in comparison with authentic racemic material (Chiracel OD, 92:8 hexanes:*i*-PrOH, 0.5 mL/min, 220 nm): *t*<sub>R</sub> of **4e**: 17 min (major) and 20 min (minor).

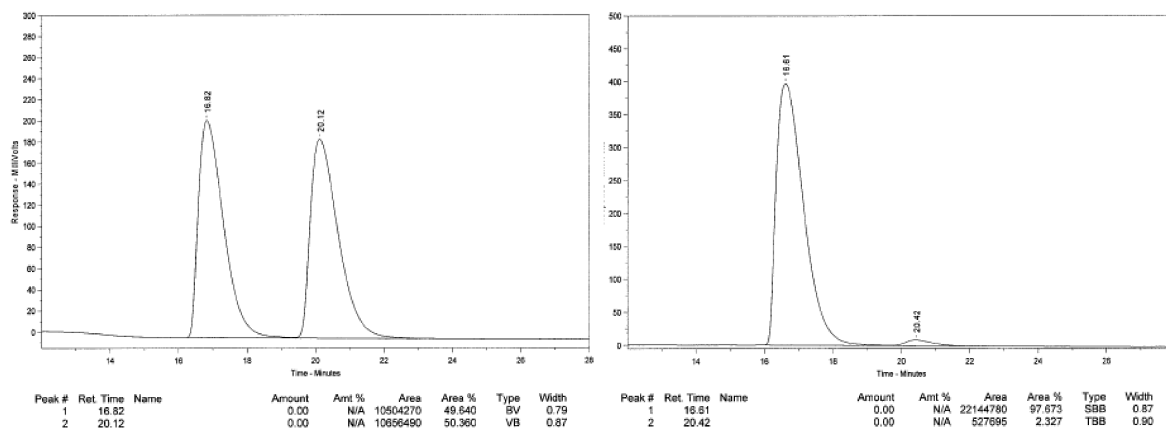

| Peak # | Ret. Time | Area % | Peak # | Ret. Time | Area % |
|--------|-----------|--------|--------|-----------|--------|
| 1      | 16.8      | 49.640 | 1      | 16.6      | 97.673 |
| 2      | 20.1      | 50.360 | 2      | 20.4      | 2.327  |

**(R)-N-(1-(4-Bromophenyl)but-3-en-1-yl)-P,P-diphenylphosphinic amide (4f, Table 2):** The title compound is purified identically to **4b** affording **4f** (39.2 mg, 0.0920 mmol, 92% yield) as a white solid. The analytical data are fully consistent with those reported

previously.<sup>13</sup> <sup>1</sup>H NMR (400 MHz, CDCl<sub>3</sub>): δ 7.87–7.82 (2H, m) 7.78–7.72 (2H, m), 7.51–7.47 (1H, m), 7.45–7.37 (5H, m), 7.35–7.30 (2H, m), 7.08–7.05 (2H, m), 5.57 (1H, dddd, *J* = 16.8, 10.0, 7.2, 7.2 Hz), 5.13–5.06 (2H, m), 4.31 (1H, dddd, *J* = 10.0, 10.0, 6.4, 6.4 Hz), 3.30 (1H, br dd, *J* = 9.6, 5.6 Hz), 2.69–2.55 (2H, m); HRMS Calcd for C<sub>22</sub>H<sub>22</sub>BrNOP [M + H]<sup>+</sup>: 426.0622; HRMS Calcd for C<sub>22</sub>H<sub>22</sub>BrNOP [M + H]<sup>+</sup>: 426.06224; Found: 426.06197. [α]<sub>D</sub><sup>20</sup> = +73 (*c* = 1.0, CHCl<sub>3</sub>) for a 97:3 er sample. The enantiomeric purity was determined by HPLC analysis in comparison with authentic racemic material (Chiracel AD-H, 97:3 hexanes:*i*-PrOH, 0.5 mL/min, 220 nm): *t*<sub>R</sub> of **4f**: 36 min (minor) and 44 min (major).

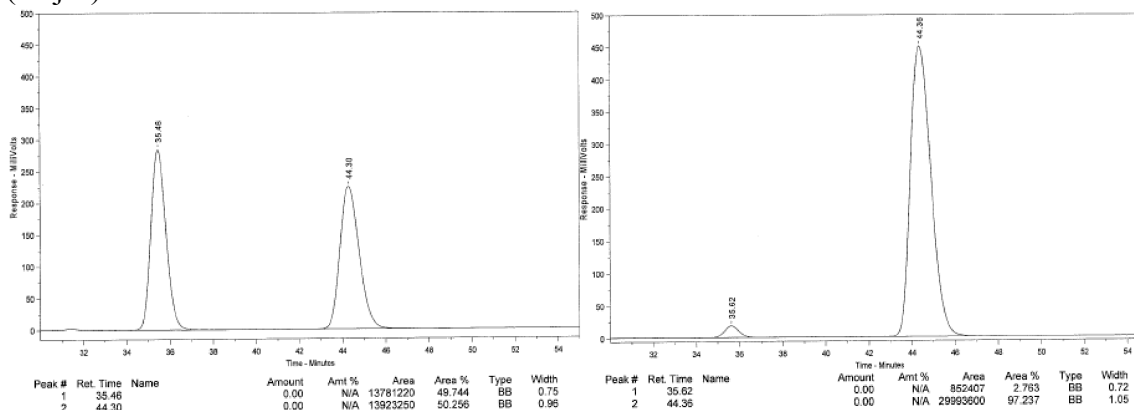

| Peak # | Ret. Time | Area % | Peak # | Ret. Time | Area % |
|--------|-----------|--------|--------|-----------|--------|
| 1      | 35.5      | 49.744 | 1      | 35.6      | 2.763  |
| 2      | 44.3      | 50.256 | 2      | 44.4      | 97.237 |

**(*R*)-*P,P*-Diphenyl-*N*-(1-(4-(trifluoromethyl)phenyl)but-3-en-1-yl)phosphinic amide (**4g**, Table 2):** The title compound is purified identically to **4b** affording **4g** (38.8 mg, 0.0934 mmol, 93% yield) as a white solid. The analytical data are fully consistent with those reported previously.<sup>13</sup> <sup>1</sup>H NMR (400 MHz, CDCl<sub>3</sub>): δ 7.88–7.83 (2H, m) 7.75–7.70 (2H, m), 7.52–7.48 (3H, m), 7.45–7.40 (3H, m), 7.32–7.28 (4H, m), 5.58 (1H, dddd, *J* = 17.2, 10.0, 7.2, 7.2 Hz), 5.14–5.08 (2H, m), 4.41 (1H, dddd, *J* = 9.6, 9.6, 6.4, 6.4 Hz), 3.49 (1H, br dd, *J* = 8.8, 6.2 Hz), 2.71–2.58 (2H, m); HRMS Calcd for C<sub>23</sub>H<sub>22</sub>F<sub>3</sub>NOP [M + H]<sup>+</sup>: 416.13911; Found: 416.13996. [α]<sub>D</sub><sup>20</sup> = +57 (*c* = 0.45, CHCl<sub>3</sub>) for a 98:2 er sample. The enantiomeric purity was determined by HPLC analysis in comparison with authentic racemic material (Chiracel OD, 92:8 hexanes:*i*-PrOH, 0.5 mL/min, 220 nm): *t*<sub>R</sub> of **4g**: 17 min (major) and 19 min (minor).

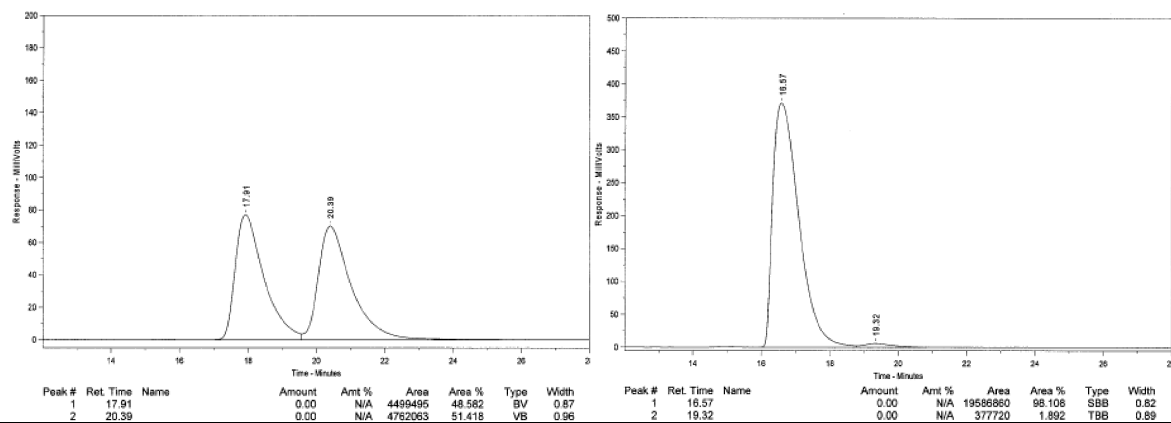

| Peak # | Ret. Time | Area % | Peak # | Ret. Time | Area % |
|--------|-----------|--------|--------|-----------|--------|
| 1      | 17.9      | 48.582 | 1      | 16.6      | 98.108 |
| 2      | 20.4      | 51.418 | 2      | 19.3      | 1.892  |

**(R)-Methyl-4-(1-((diphenylphosphoryl)amino)but-3-en-1-yl)benzoate (4h, Table 2):**

The title compound is synthesized and purified analogously to **4b** except for the following changes: 1) 2.5 mol % aminophenol **2g** (instead of 3 mol % **2g**) 2) 1.5 equiv. MeOH (instead of 2.5 equiv.). Homoallylamide **4h** (74.4 mg, 0.183 mmol, 92% yield) is obtained as a white solid. M.p. = 128 °C. IR (neat): 3144 (w, br), 3055 (w), 3006 (w), 2948 (w), 2872 (w), 1720 (s), 1610 (w), 1435 (m), 1277 (s), 1193 (s), 1181 (s), 1106 (s), 1067 (m), 926 (m), 907 (m), 721 (s), 694 (s), 561 (m), 527 (s)  $\text{cm}^{-1}$ ;  $^1\text{H}$  NMR (400 MHz,  $\text{CDCl}_3$ ):  $\delta$  7.93 (2H, d,  $J = 8.4$  Hz), 7.86–7.80 (2H, m), 7.74–7.68 (2H, m), 7.47–7.37 (4H, m), 7.30–7.25 (2H, m), 7.25 (2H, d,  $J = 8.0$  Hz), 5.55 (1H, dddd,  $J = 17.2, 10.0, 7.6, 6.8$  Hz), 5.09–5.03 (2H, m), 4.38 (1H, app tt,  $J = 10.1, 6.2$  Hz), 3.88 (3H, s), 3.52 (1H, br dd,  $J = 9.9, 5.9$  Hz), 2.70–2.56 (2H, m);  $^{13}\text{C}$  NMR (100 MHz,  $\text{CDCl}_3$ ):  $\delta$  166.9, 148.4 (d,  $J = 5.0$  Hz), 133.2, 132.9 (d,  $J = 127.0$  Hz), 132.5 (d,  $J = 9.7$  Hz), 132.0 (d,  $J = 2.7$  Hz), 131.9 (d,  $J = 130.0$  Hz), 131.9 (d,  $J = 3.9$  Hz, one peak is overlapping with the other d at 131.9), 131.9 (d,  $J = 9.5$  Hz), 129.8, 129.0, 128.6 (d,  $J = 12.5$  Hz), 128.4 (d,  $J = 12.6$  Hz), 126.6, 119.4, 54.3, 52.2, 43.6 (d,  $J = 4.2$  Hz); HRMS Calcd for  $\text{C}_{24}\text{H}_{25}\text{NO}_3\text{P}$   $[\text{M} + \text{H}]^+$ : 406.15720; Found: 406.15720.  $[\alpha]_{\text{D}}^{20} = +75.5$  ( $c = 2.40, \text{CHCl}_3$ ) for a 98:2 er sample. The enantiomeric purity of this compound was determined by HPLC analysis in comparison with authentic racemic material (Chiracel AD-H, 80:20 hexanes:*i*-PrOH, 0.8 mL/min, 220 nm):  $t_{\text{R}}$  of **4h**: 30 min (major) and 38 min (minor).

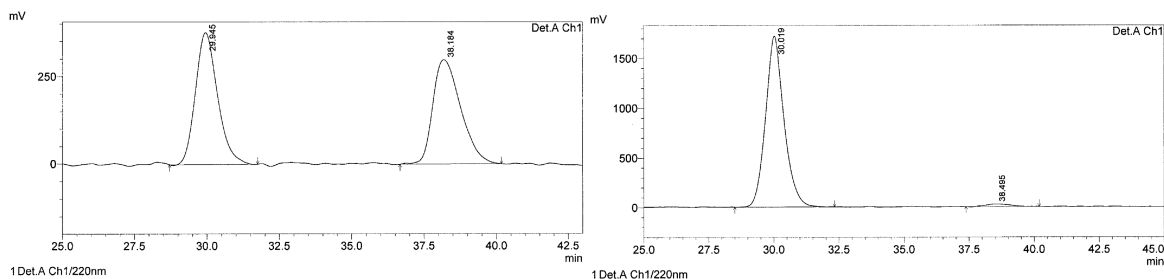

| PeakTable |           |          |        |         |          |
|-----------|-----------|----------|--------|---------|----------|
| Peak#     | Ret. Time | Area     | Height | Area %  | Height % |
| 1         | 29.945    | 20067493 | 376847 | 50.019  | 55.792   |
| 2         | 38.184    | 20052576 | 298603 | 49.981  | 44.208   |
| Total     |           | 40120069 | 675450 | 100.000 | 100.000  |

| PeakTable |           |          |         |         |          |
|-----------|-----------|----------|---------|---------|----------|
| Peak#     | Ret. Time | Area     | Height  | Area %  | Height % |
| 1         | 30.019    | 84765285 | 1719371 | 98.190  | 98.562   |
| 2         | 38.495    | 1562574  | 25084   | 1.810   | 1.438    |
| Total     |           | 86327859 | 1744455 | 100.000 | 100.000  |

| Peak # | Ret. Time | Area % | Peak # | Ret. Time | Area % |
|--------|-----------|--------|--------|-----------|--------|
| 1      | 29.9      | 50.019 | 1      | 30.0      | 98.190 |
| 2      | 38.2      | 49.981 | 2      | 38.5      | 1.810  |

**(R)-N-(1-(4-Methoxyphenyl)but-3-en-1-yl)-P,P-diphenylphosphinic amide (4i, Table 2):** The title compound is synthesized and purified analogously to **4b** except for the following changes: 1) 2.5 mol % aminophenol **2g** (instead of 3 mol % **2g**) 2) 1.5 equiv. MeOH (instead of 2.5 equiv.). Homoallylamide **4i** (74.1 mg, 0.196 mmol, 98% yield) is afforded as a white solid. The analytical data are fully consistent with those reported previously.<sup>13</sup> M.p. = 116–117 °C. <sup>1</sup>H NMR (400 MHz, CDCl<sub>3</sub>): δ 7.88–7.83 (2H, m), 7.80–7.75 (2H, m), 7.49–7.38 (3H, m), 7.35–7.30 (2H, m), 7.14–7.10 (2H, m), 6.83–6.79 (2H, m), 5.56 (1H, dddd, *J* = 17.2, 10.4, 6.8, 6.8 Hz), 5.10–5.02 (2H, m), 4.30 (1H, dddd, *J* = 9.6, 9.6, 6.4, 6.4 Hz), 3.79 (3H, s), 3.28 (1H, br dd, *J* = 9.6, 6.0 Hz), 2.72–2.57 (2H, m); HRMS Calcd for C<sub>23</sub>H<sub>25</sub>NO<sub>2</sub>P [M + H]<sup>+</sup>: 378.16229; Found: 378.16236. [α]<sub>D</sub><sup>20</sup> = +54.7 (*c* = 1.99, CHCl<sub>3</sub>) for a 96.5:3.5 er sample. The enantiomeric purity of this compound was determined by HPLC analysis in comparison with authentic racemic material (Chiracel OJ-H, 92:8 hexanes:*i*-PrOH, 0.8 mL/min, 220 nm): *t*<sub>R</sub> of **4i**: 12 min (minor) and 19 min (major).

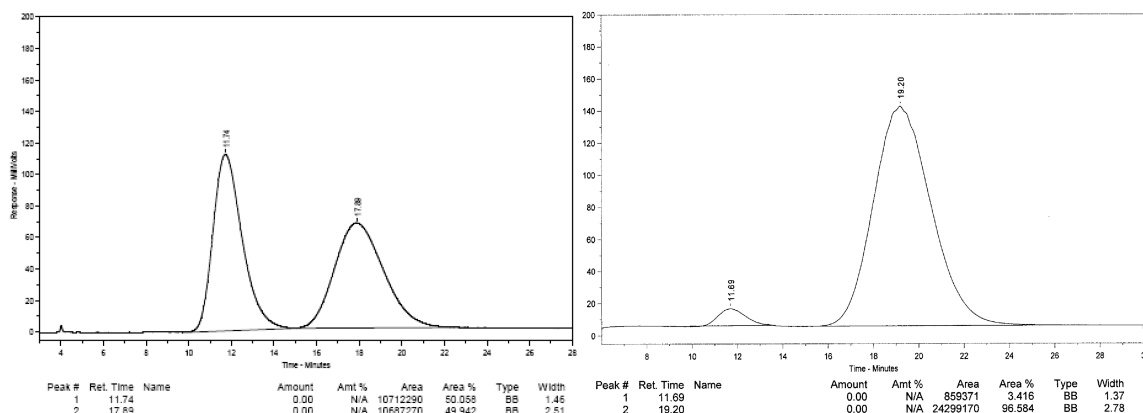

| Peak # | Ret. Time | Area | Area % | Type | Width | Peak # | Ret. Time | Area | Area % | Type | Width |
|--------|-----------|------|--------|------|-------|--------|-----------|------|--------|------|-------|
| 1      | 11.7      | 0.00 | N/A    | BB   | 1.46  | 1      | 11.69     | 0.00 | N/A    | BB   | 1.37  |
| 2      | 17.9      | 0.00 | N/A    | BB   | 2.51  | 2      | 19.20     | 0.00 | N/A    | BB   | 2.78  |

**(R)-N-(1-(4-(Dibutylamino)phenyl)but-3-en-1-yl)-P,P-diphenylphosphinic amide (4j, Table 2):** The title compound is synthesized analogously to **4b** except for the following changes: 1) 2.5 mol % aminophenol **2g** (instead of 3 mol % **2g**) 2) 1.5 equiv. MeOH (instead of 2.5 equiv.). 3) Reaction time is six h. 4) After NaIO<sub>4</sub> workup (see representative procedure above), the unpurified mixture is treated for 12 h while allowing it to stir with ~ 1 g basic aluminum oxide in 4 mL dichloromethane:diethyl ether (1:1) to hydrolyze unreacted **3j**, after which the aluminum oxide is filtered off and washed with dichloromethane and ethyl acetate (20 mL). The product is purified as described for **4b**, affording **4j** (44.2 mg, 0.0931 mmol, 93% yield) as a white solid. M.p. = 83–84 °C. IR (neat): 3154 (w, br), 3071 (w), 2955 (m), 2930 (m), 2870 (m), 1614 (m), 1519 (m), 1455 (m), 1436 (m), 1368 (w), 1283 (w), 1181 (s), 1107 (s), 1066 (m), 925 (m), 900 (m), 752 (w), 722 (s), 693 (s), 553 (s), 521 (s) cm<sup>-1</sup>; <sup>1</sup>H NMR (400 MHz, CDCl<sub>3</sub>): δ 7.89–7.79 (4H, m), 7.49–7.32 (6H, m), 7.03 (2H, d, *J* = 8.8 Hz), 6.54 (2H, d, *J* = 8.8 Hz), 5.63 (1H, app ddt, *J* = 17.2, 10.0, 7.2 Hz), 5.10–4.99 (2H, m), 4.26–4.19 (1H, m), 3.23 (4H, app dd, *J* = 7.8, 7.2 Hz), 3.26–3.21 (1H, m, overlapping with the dd at 3.23), 2.75–2.58 (2H, m), 1.59–1.52 (4H, m), 1.40–1.30 (4H, app sextet, *J* = 7.6 Hz), 0.96 (6H, t, *J* = 7.6 Hz); <sup>13</sup>C NMR (100 MHz, CDCl<sub>3</sub>): δ 147.3, 134.6, 133.6 (d, *J* = 127.0 Hz), 132.6 (d, *J* = 9.5 Hz), 132.4 (d, *J* = 130.0 Hz), 131.9 (d, *J* = 9.3 Hz), 131.7 (d, *J* = 2.7 Hz), 131.6 (d, *J* = 2.7 Hz), 129.2 (d, *J* = 6.3 Hz), 128.4 (d, *J* = 12.3 Hz), 128.3 (d, *J* = 12.4 Hz), 127.6, 118.1, 111.5, 54.3, 50.9, 43.5 (d, *J* = 3.7 Hz), 29.5, 20.4, 14.1; HRMS Calcd for C<sub>30</sub>H<sub>40</sub>N<sub>2</sub>OP [M + H]<sup>+</sup>: 475.28782; Found: 475.28783. [α]<sub>D</sub><sup>20</sup> = +61.6 (*c* = 1.33, CHCl<sub>3</sub>) for a 92:8 er sample. The enantiomeric purity of this compound was determined by HPLC analysis in comparison with authentic racemic material (Chiracel OD–H, 92:8 hexanes:*i*-PrOH, 0.5 mL/min, 220 nm): *t*<sub>R</sub> of **4j**: 12 min (major) and 14 min (minor).

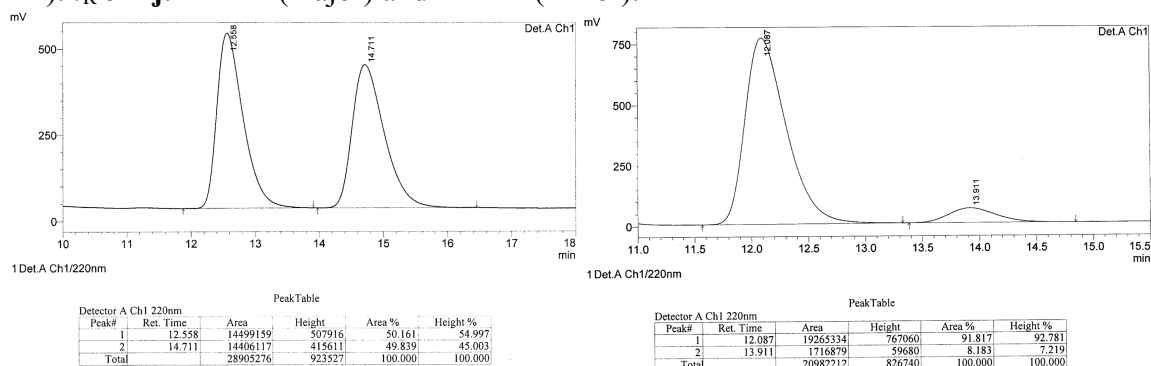

| Peak # | Ret. Time | Area % | Peak # | Ret. Time | Area % |
|--------|-----------|--------|--------|-----------|--------|
| 1      | 12.6      | 50.161 | 1      | 12.1      | 91.817 |
| 2      | 14.7      | 49.839 | 2      | 13.9      | 8.183  |

**(R)-N-(1-(Furan-2-yl)but-3-en-1-yl)-P,P-diphenylphosphinic amide (4k, Table 2):** The title compound is synthesized and purified analogously to **4b** (only with a six h reaction time) affording **4k** (32.2 mg, 0.0955 mmol, 96% yield) as a light tan solid. The analytical data are fully consistent with those reported previously.<sup>13</sup> <sup>1</sup>H NMR (400 MHz, CDCl<sub>3</sub>): δ

7.89–7.82 (4H, m), 7.50–7.37 (6H, m), 7.32–7.31 (1H, m), 6.25–6.24 (1H, m), 6.12–6.11 (1H, m), 5.63 (1H, dddd,  $J = 17.6, 10.0, 7.6, 7.6$  Hz), 5.14–5.05 (2H, m), 4.37 (1H, dddd,  $J = 10.0, 10.0, 6.4, 6.4$  Hz), 3.34 (1H, br dd,  $J = 10.4, 7.2$  Hz), 2.79–2.61 (2H, m); HRMS Calcd for  $C_{20}H_{21}NO_2P$   $[M + H]^+$ : 338.13099; Found: 338.13157.  $[\alpha]_D^{20} = +53.3$  ( $c = 1.00$ ,  $CHCl_3$ ) for a 98:2 er sample. The enantiomeric purity was determined by HPLC analysis in comparison with authentic racemic material (Chiracel OD-H, 92:8 hexanes:*i*-PrOH, 0.5 mL/min, 220 nm):  $t_R$  of **4k**: 16 min (major) and 19 min (minor).

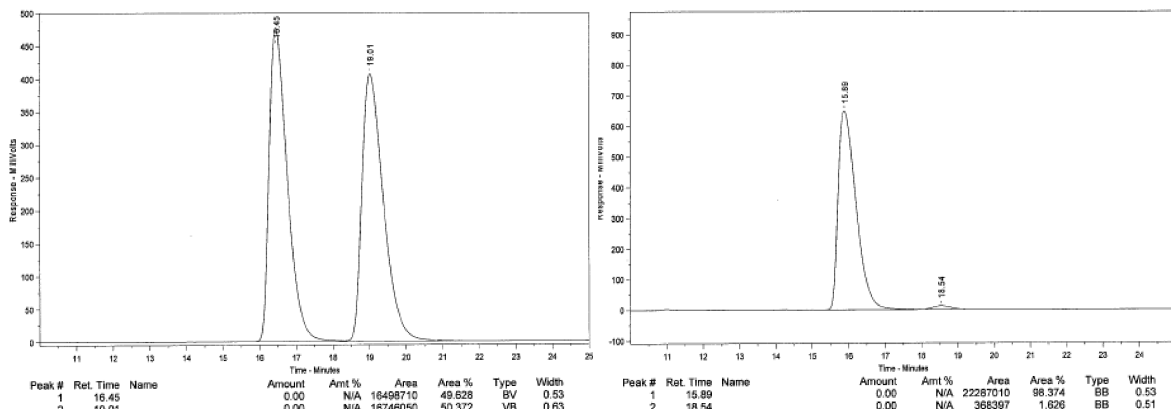

| Peak # | Ret. Time | Area % | Peak # | Ret. Time | Area % |
|--------|-----------|--------|--------|-----------|--------|
| 1      | 16.5      | 49.828 | 1      | 15.9      | 98.374 |
| 2      | 19.0      | 50.372 | 2      | 18.5      | 1.626  |

**(*R*)-*P,P*-diphenyl-*N*-(1-(pyridin-3-yl)but-3-en-1-yl)phosphinic amide (**4l**, Table 2):**

The title compound is synthesized analogously to **4b** and purified analogously to **4o** (see below). M.p. = 133–134 °C. IR (neat): 3169 (w, br), 1438 (m), 1184 (s), 1123 (m), 1109 (m), 1071 (m), 921 (w), 754 (w), 725 (m), 698 (m), 533 (m)  $cm^{-1}$ ;  $^1H$  NMR (400 MHz,  $CDCl_3$ ):  $\delta$  8.39 (2H, br dd,  $J = 4.8, 1.6$  Hz), 8.36 (1H, br d,  $J = 2.4$  Hz), 7.82–7.77 (2H, m), 7.70–7.65 (2H, m), 7.419–7.42 (2H, m), 7.40–7.34 (3H, m), 7.28–7.23 (2H, m), 7.15–7.11 (1H, m), 5.53 (1H, dddd,  $J = 16.8, 10.4, 7.2, 7.2$  Hz), 5.08–5.03 (2H, m), 4.35 (1H, dddd,  $J = 9.6, 9.6, 6.4, 6.4$  Hz), 3.33 (1H, br dd,  $J = 8.0, 5.6$  Hz), 2.65–2.55 (2H, m);  $^{13}C$  NMR (125 MHz,  $CDCl_3$ ):  $\delta$  148.6 (d,  $J = 15.6$  Hz), 138.5 (d,  $J = 4.5$  Hz), 134.4, 132.9, 132.7 (d,  $J = 127$  Hz, peak overlaps with doublet at 132.06), 132.5 (d,  $J = 9.7$  Hz), 132.2 (d,  $J = 2.2$  Hz), 132.1 (d,  $J = 2.9$  Hz), 131.9 (d,  $J = 8.9$  Hz), 131.8 (d,  $J = 127$  Hz, peak overlaps with doublet at 132.5), 128.7 (d,  $J = 12.6$  Hz), 128.5 (d,  $J = 12.7$  Hz), 123.4, 119.9, 52.5, 43.4 (d,  $J = 4.5$  Hz); HRMS Calcd for  $C_{21}H_{22}N_2OP$   $[M + H]^+$ : 349.14697; Found: 349.14651.  $[\alpha]_D^{25} = +45.2$  ( $c = 1.00$ ,  $CHCl_3$ ) for a 98:2 er sample. The enantiomeric purity of this compound was determined by HPLC analysis in comparison with authentic racemic material (Chiralpak AD-H, 86:14 hexanes:*i*-PrOH, 0.6 mL/min, 220 nm):  $t_R$  of **4l**: 38 min (major) and 43 min (minor).

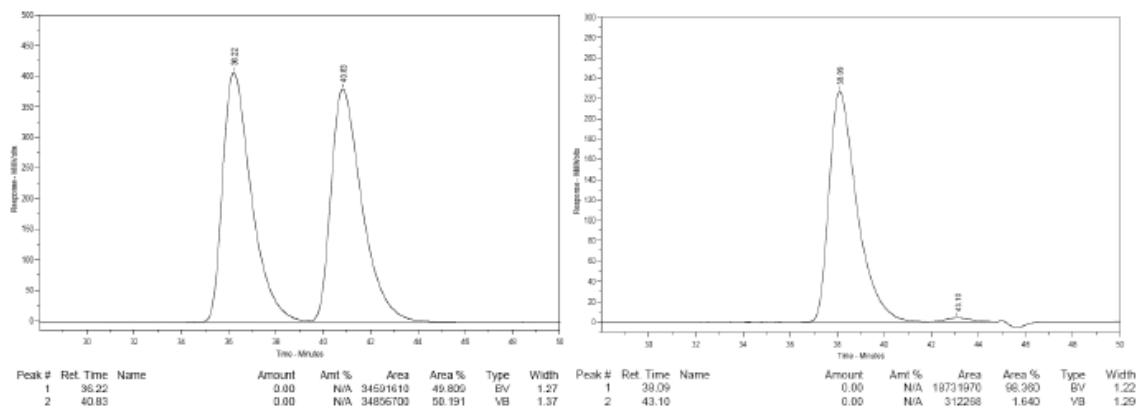

| Peak # | Ret. Time | Area % | Peak # | Ret. Time | Area % |
|--------|-----------|--------|--------|-----------|--------|
| 1      | 36.2 min  | 49.809 | 1      | 39.1 min  | 98.360 |
| 2      | 40.8 min  | 50.191 | 2      | 43.1 min  | 1.640  |

**(R)-P,P-Diphenyl-N-(1-(p-4-methylphenyl)but-3-en-1-yl)phosphinic amide (S7, not shown in manuscript, see Chart S1):** This compound is not listed in Table 2 of the publication, but has been used for determination of the absolute stereochemistry through X-ray analysis. It was synthesized and purified analogously to **4b** except for the following changes: 1) 2.5 mol % aminophenol **2g** (instead of 3 mol % **2g**) 2) 1.5 equiv. MeOH (instead of 2.5 equiv.). Homoallylamide **S7** (70.8 mg, 0.196 mmol, 98% yield) is obtained as a white solid. Crystals suitable for X-ray crystallography were obtained by slow evaporation of dichloromethane (See Part D of the Supplementary Information for the X-ray crystal structure). M.p. = 130–131 °C. IR (neat): 3178 (w, br), 3076 (w), 3052 (w), 3007 (w), 2977 (w), 2919 (w), 2882 (w), 1454 (m), 1435 (m), 1181 (s), 1123 (m), 1108 (m), 1078 (s), 917 (m), 899 (m), 748 (m), 723 (s), 694 (s), 561 (m), 535 (s), 497 (m) cm<sup>-1</sup>; <sup>1</sup>H NMR (400 MHz, CDCl<sub>3</sub>): δ 7.88–7.75 (4H, m), 7.49–7.29 (6H, m), 7.09 (4H, app s), 5.58 (1H, app ddt, *J* = 17.2 10.0, 7.2 Hz), 5.10–5.00 (2H, m), 4.33–4.26 (1H, m), 3.40 (1H, br dd, *J* = 10.0, 6.4 Hz), 2.74–2.58 (2H, m), 2.31 (3H, s); <sup>13</sup>C NMR (100 MHz, CDCl<sub>3</sub>): δ 140.1 (d, *J* = 5.7 Hz), 136.6, 133.9, 133.3 (d, *J* = 127.0 Hz, 1 peak hidden under 133.9), 132.6 (d, *J* = 9.6 Hz), 132.2 (d, *J* = 130.0 Hz), 131.9 (d, *J* = 9.6 Hz), 131.8 (d, *J* = 3 Hz, 1 peak hidden under 131.9), 131.7 (d, *J* = 2.7 Hz), 129.1, 128.5 (d, *J* = 12.5 Hz), 128.3 (d, *J* = 12.6 Hz), 126.4, 118.6, 54.5, 43.7 (d, *J* = 3.8 Hz), 21.1; HRMS Calcd for C<sub>23</sub>H<sub>25</sub>NOP [M + H]<sup>+</sup>: 362.16738; Found: 362.16709. [α]<sub>D</sub><sup>20</sup> = +50.8 (*c* = 2.11, CHCl<sub>3</sub>) for a 96.5:3.5 er sample. The enantiomeric purity of this compound was determined by HPLC analysis in comparison with authentic racemic material (Chiracel OD-H, 92:8 hexanes:*i*-PrOH, 0.5 mL/min, 220 nm): *t*<sub>R</sub> of **S7**: 16 min (major) and 18 min (minor).

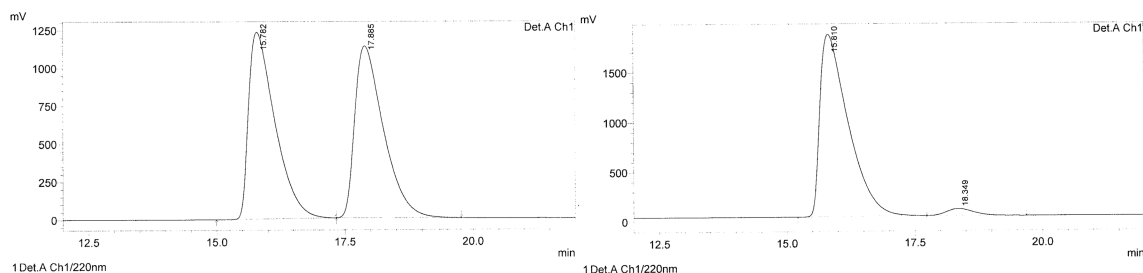

| PeakTable |           |          |         |         |          |
|-----------|-----------|----------|---------|---------|----------|
| Peak#     | Ret. Time | Area     | Height  | Area %  | Height % |
| 1         | 15.782    | 44246577 | 1233134 | 49.997  | 52.052   |
| 2         | 17.885    | 44232025 | 1135919 | 50.003  | 47.948   |
| Total     |           | 88498602 | 2369052 | 100.000 | 100.000  |

| PeakTable |           |          |         |         |          |
|-----------|-----------|----------|---------|---------|----------|
| Peak#     | Ret. Time | Area     | Height  | Area %  | Height % |
| 1         | 15.810    | 70757069 | 1835297 | 96.568  | 96.362   |
| 2         | 18.349    | 2514862  | 69280   | 3.432   | 3.638    |
| Total     |           | 73271931 | 1904578 | 100.000 | 100.000  |

| Peak # | Ret. Time | Area % | Peak # | Ret. Time | Area % |
|--------|-----------|--------|--------|-----------|--------|
| 1      | 15.8      | 49.997 | 1      | 15.8      | 96.568 |
| 2      | 17.9      | 50.003 | 2      | 18.3      | 3.432  |

**(R)-N-(3-Methyl-1-phenylbut-3-en-1-yl)-P,P-diphenylphosphinic amide (4m, Table 2):**

The title compound is synthesized and purified analogously to **4b** [except allylboronic acid pinacol ester **1b** (32  $\mu$ L, 0.15 mmol) is used as the nucleophile instead of **1a**], affording **4m** (34.4 mg, 0.0952 mmol, 95% yield) as a white solid. The analytical data are fully consistent with those reported previously.<sup>13</sup>  $^1\text{H}$  NMR (400 MHz,  $\text{CDCl}_3$ ):  $\delta$  7.86–7.80 (2H, m), 7.76–7.70 (2H, m), 7.50–7.46 (1H, m), 7.44–7.38 (3H, m), 7.29–7.17 (7H, m), 4.78 (1H, s), 4.69 (1H, s), 4.40 (1H, dddd,  $J = 16.4, 16.4, 8.4, 8.4$  Hz), 3.32 (1H, br dd,  $J = 8.0, 6.0$  Hz), 2.62 (1H, dd,  $J = 13.6, 7.2$  Hz), 2.53 (1H, dd,  $J = 14.0, 7.2$  Hz), 1.58 (3H, s); HRMS Calcd for  $\text{C}_{23}\text{H}_{25}\text{NOP} [\text{M} + \text{H}]^+$ : 362.16738; Found: 362.16649.  $[\alpha]_D^{20} = +39$  ( $c = 1.2$ ,  $\text{CHCl}_3$ ) for a 97.5:2.5 er sample. The enantiomeric purity was determined by HPLC analysis in comparison with authentic racemic material (Chiracel OD-H, 92:8 hexanes:*i*-PrOH, 0.8 mL/min, 220 nm):  $t_R$  of **4m**: 11 min (major) and 14 min (minor).

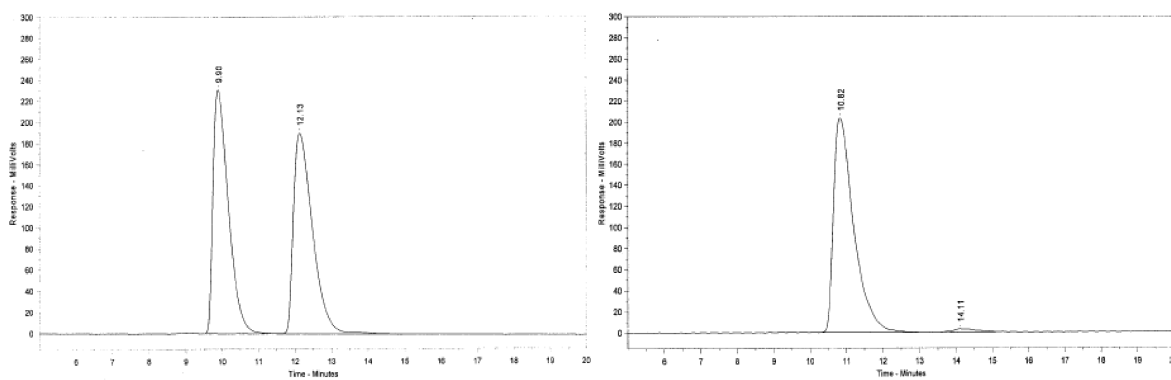

| Peak # | Ret. Time | Name | Amount | Am% % | Area    | Area % | Type | Width |
|--------|-----------|------|--------|-------|---------|--------|------|-------|
| 1      | 9.90      |      | 0.00   | N/A   | 6814804 | 49.583 | BV   | 0.45  |
| 2      | 12.13     |      | 0.00   | N/A   | 6929350 | 50.417 | VB   | 0.56  |

| Peak # | Ret. Time | Name | Amount | Am% % | Area    | Area % | Type | Width |
|--------|-----------|------|--------|-------|---------|--------|------|-------|
| 1      | 10.82     |      | 0.00   | N/A   | 7858126 | 98.208 | BB   | 0.56  |
| 2      | 14.11     |      | 0.00   | N/A   | 143353  | 1.792  | BB   | 0.65  |

| Peak # | Ret. Time | Area % | Peak # | Ret. Time | Area % |
|--------|-----------|--------|--------|-----------|--------|
| 1      | 9.90      | 49.583 | 1      | 10.8      | 98.206 |
| 2      | 12.1      | 50.417 | 2      | 14.1      | 1.792  |

**(R)-N-(1,3-Diphenylbut-3-en-1-yl)-P,P-diphenylphosphinic amide (4n, Table 2):**

The title compound is synthesized and purified analogously to **4b** [except allylboronic acid pinacol ester **1c** (37  $\mu$ L, 0.15 mmol) is used as the nucleophile instead of **1a** and the



reaction time is 6 h] affording **4n** (42.1 mg, 0.0994 mmol, >98% yield) as a white foam. The analytical data are fully consistent with those reported previously.<sup>13</sup> <sup>1</sup>H NMR (400 MHz, CDCl<sub>3</sub>): δ 7.76–7.70 (4H, m), 7.47–7.40 (2H, m), 7.37–7.30 (4H, m), 7.27–7.16 (8H, m), 7.07–7.00 (2H, m), 5.21 (1H, d, *J* = 1.2 Hz), 4.87 (1H, d, *J* = 1.2 Hz), 4.27 (1H, dddd, *J* = 8.4, 8.4, 6.4, 6.4 Hz), 3.29 (1H, br dd, *J* = 8.8, 5.6 Hz), 3.25 (1H, dd, *J* = 14.0, 6.0 Hz), 2.99 (1H, dd, *J* = 14.0, 8.0 Hz); HRMS Calcd for C<sub>28</sub>H<sub>27</sub>NOP [M + H]<sup>+</sup>: 424.18303; Found: 424.18255. [α]<sub>D</sub><sup>20</sup> = +26 (*c* = 1.7, CHCl<sub>3</sub>) for a 98:2 er sample. The enantiomeric purity was determined by HPLC analysis in comparison with authentic racemic material (Chiracel OD-H, 92:8 hexanes:*i*-PrOH, 0.8 mL/min, 220 nm): *t*<sub>R</sub> of **4n**: 15 min (minor) and 16 min (major).

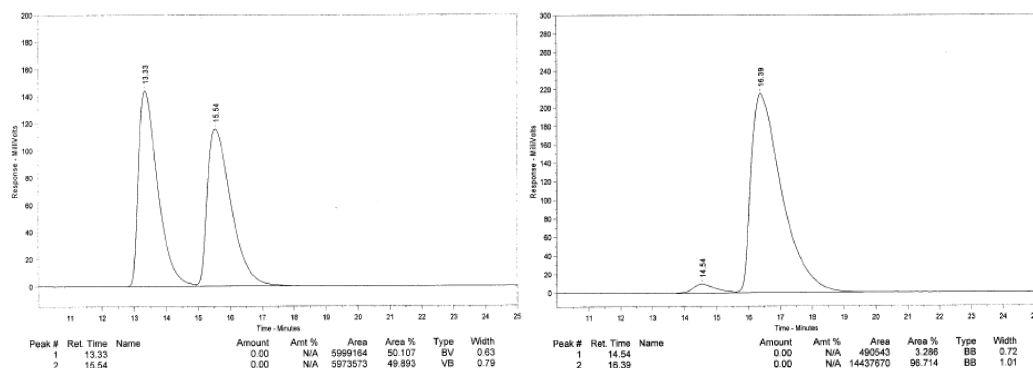

| Peak # | Ret. Time | Area % | Peak # | Ret. Time | Area % |
|--------|-----------|--------|--------|-----------|--------|
| 1      | 13.3      | 50.107 | 1      | 14.5      | 3.286  |
| 2      | 15.5      | 49.893 | 2      | 16.4      | 96.714 |

**(*R,E*)-*P,P*-Diphenyl-*N*-(1-phenylhexa-1,5-dien-3-yl)phosphinic amide (S8, not shown in manuscript, see Chart S1):** The title compound is purified in the manner identical to that used for **4b** to afford **S8** (31.3 mg, 0.0838 mmol, 84% yield) as a white solid. The analytical data are fully consistent with those reported previously.<sup>13</sup> <sup>1</sup>H NMR (400 MHz, CDCl<sub>3</sub>): δ 7.96–7.87 (4H, m), 7.51–7.39 (6H, m), 7.31–7.26 (4H, m), 7.24–7.21 (1H, m), 6.46–6.42 (1H, m), 6.15 (1H, ddd, *J* = 15.9, 6.3, 2.4 Hz), 5.78 (1H, dddd, *J* = 14.4, 7.6, 6.8, 6.8 Hz), 5.20–5.12 (2H, m), 4.01–3.92 (1H, m), 3.09 (1H, br dd, *J* = 9.6, 6.0 Hz), 2.59–2.45 (2H, m); HRMS Calcd for C<sub>24</sub>H<sub>25</sub>NOP [M + H]<sup>+</sup>: 374.16738; Found: 374.16756. [α]<sub>D</sub><sup>20</sup> = +89 (*c* = 0.65, CHCl<sub>3</sub>) for a 99:1 er sample. The enantiomeric purity was determined by HPLC analysis in comparison with authentic racemic material (Chiracel OD, 92:8 hexanes:*i*-PrOH, 0.6 mL/min, 220 nm): *t*<sub>R</sub> of **S8**: 17 min (major) and 21 min (minor).

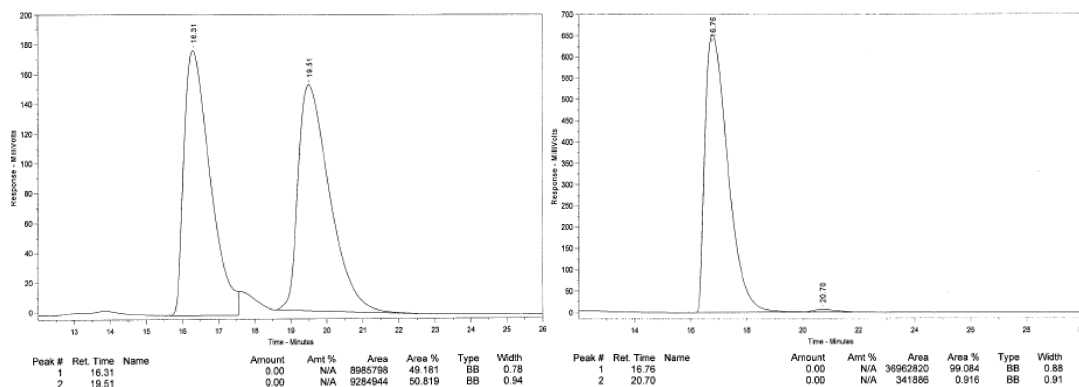

| Peak # | Ret. Time | Area % | Peak # | Ret. Time | Area % |
|--------|-----------|--------|--------|-----------|--------|
| 1      | 16.3      | 49.181 | 1      | 16.8      | 99.084 |
| 2      | 19.5      | 50.819 | 2      | 20.7      | 0.916  |

**(*R,E*)-*N*-(1-(2-Nitrophenyl)hexa-1,5-dien-3-yl)-*P,P*-diphenylphosphinic amide (**S9**, not shown in the manuscript, see Chart S1):** The title compound is purified identically to **4b** affording **S9** (39.6 mg, 0.095 mmol, 95% yield) as a white solid. M.p. = 135 °C. IR (neat): 3149 (m, br), 3067 (w), 2857 (w), 1641 (w), 1605 (w), 1571 (w), 1520 (s), 1436 (m), 1350 (m), 1178 (s), 1123 (m), 1106 (m), 1067 (m), 952 (m), 918 (m), 745 (m), 724 (s), 691 (s), 541 (s)  $\text{cm}^{-1}$ ;  $^1\text{H}$  NMR (400 MHz,  $\text{CDCl}_3$ ):  $\delta$  8.00–7.88 (5H, m), 7.55–7.35 (9H, m), 7.01 (1H, dd,  $J = 16.0, 1.6$  Hz), 6.17 (1H, dd,  $J = 15.6, 5.6$  Hz), 5.80 (1H, dddd,  $J = 16.8, 10.0, 7.6, 6.4$  Hz), 5.22–5.14 (2H, m), 4.02–3.96 (1H, m), 3.16 (1H, br dd,  $J = 9.6, 5.6$  Hz), 2.62–2.49 (2H, m);  $^{13}\text{C}$  NMR (100 MHz,  $\text{CDCl}_3$ ):  $\delta$  147.7, 137.0 (d,  $J = 6.0$  Hz), 133.3, 133.3, 132.9, 132.9 (d,  $J = 128.0$  Hz), 132.5 (d,  $J = 9.4$  Hz), 132.4 (d,  $J = 130.0$  Hz), 132.0 (2 d peaks exactly overlapping,  $J = 3$  Hz), 132.0 (d,  $J = 9.3$  Hz), 129.2, 128.7 (2 d peaks exactly overlapping,  $J = 12.6$  Hz), 128.2, 125.9, 124.6, 119.5, 52.5, 42.0 (d,  $J = 4.2$  Hz); HRMS Calcd for  $\text{C}_{24}\text{H}_{24}\text{N}_2\text{O}_3\text{P}$   $[\text{M} + \text{H}]^+$ : 419.15245; Found: 419.15207.  $[\alpha]_D^{20} = +94.4$  ( $c = 1.00$ ,  $\text{CHCl}_3$ ) for a 99.5:0.5 er sample. The enantiomeric purity of this compound was determined by HPLC analysis in comparison with authentic racemic material (Chiracel OD-H, 92:8 hexanes:*i*-PrOH, 0.5 mL/min, 220 nm):  $t_R$  of **S9** 30 min (minor) and 32 min (major).

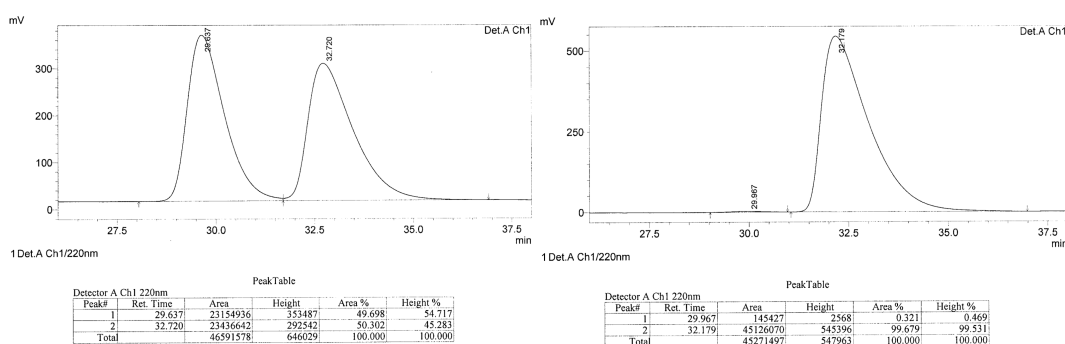

| Peak # | Ret. Time | Area % | Peak # | Ret. Time | Area % |
|--------|-----------|--------|--------|-----------|--------|
| 1      | 29.6      | 49.698 | 1      | 30.0      | 0.321  |
| 2      | 32.7      | 50.302 | 2      | 32.2      | 99.679 |

**(*R,E*)-*N*-(1-(4-Methoxyphenyl)hexa-1,5-dien-3-yl)-*P,P*-diphenylphosphinic amide (S10, not shown in the manuscript, see Chart S1):** The title compound is purified in the manner identical to that used for **4b** to generate **S10** (39.4 mg, 0.098 mmol, 98% yield) as a white solid. M.p. = 134 °C. IR (neat): 3180 (w, br), 3059 (w), 2929 (w), 2837 (w), 1607 (w), 1509 (m), 1433 (m), 1248 (m), 1185 (s), 1124 (m), 1108 (m), 1069 (m), 1031 (m), 976 (m), 912 (w), 811 (m), 745 (m), 725 (s), 693 (s), 541 (s), 516 (m) cm<sup>-1</sup>; <sup>1</sup>H NMR (400 MHz, CDCl<sub>3</sub>): δ 7.96–7.86 (4H, m), 7.51–7.37 (6H, m), 7.22 (2H, d, *J* = 8.8 Hz), 6.82 (2H, d, *J* = 8.4 Hz), 6.37 (1H, d, *J* = 15.6 Hz), 6.01 (1H, dd, *J* = 16.0, 6.4 Hz), 5.79 (1H, dddd, *J* = 17.2, 10.4, 7.6, 7.2 Hz), 5.19–5.10 (2H, m), 3.94 (1H, m), 3.80 (3H, s), 3.08 (1H, br dd, *J* = 9.6, 6.0 Hz), 2.58–2.43 (2H, m); <sup>13</sup>C NMR (100 MHz, CDCl<sub>3</sub>): δ 159.3, 133.9, 133.3 (d, *J* = 127.0 Hz), 132.7 (d, *J* = 130.0 Hz), 132.6 (d, *J* = 9.4 Hz), 132.0 (d, *J* = 9.5 Hz), 131.9 (d, *J* = 2.8 Hz), 131.8 (d, *J* = 2.8 Hz), 129.9, 129.6, 129.3 (d, *J* = 5.7 Hz), 128.6 (d, *J* = 12.4 Hz), 128.5 (d, *J* = 12.6 Hz), 127.7, 119.0, 114.0, 55.4, 52.9, 42.4 (d, *J* = 4.5 Hz); HRMS Calcd for C<sub>25</sub>H<sub>27</sub>NO<sub>2</sub>P [M + H]<sup>+</sup>: 404.17794; Found: 404.17730. [α]<sub>D</sub><sup>20</sup> = +128.2 (*c* = 1.00, CHCl<sub>3</sub>) for a 99:1 er sample.

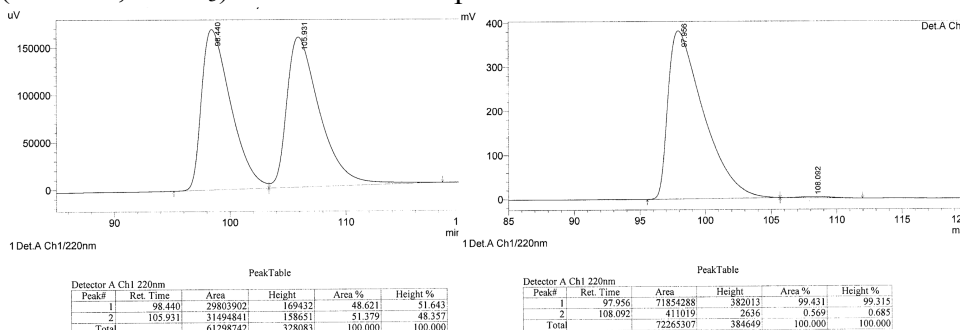

| Peak # | Ret. Time | Area % | Peak # | Ret. Time | Area % |
|--------|-----------|--------|--------|-----------|--------|
| 1      | 98.4      | 48.621 | 1      | 98.0      | 99.431 |
| 2      | 105.9     | 51.379 | 2      | 108.1     | 0.569  |

The enantiomeric purity of this compound was determined by HPLC analysis in comparison with authentic racemic material (Chiracel OD–H, 95:5 hexanes:*i*-PrOH, 0.2 mL/min, 220 nm): *t*<sub>R</sub> of **S10**: 98 min (major) and 108 min (minor).

**(*R,Z*)-*N*-(2-Bromo-1-phenylhexa-1,5-dien-3-yl)-*P,P*-diphenylphosphinic amide (S11, not shown in manuscript, see Chart S1):** The title compound is purified identically to **4b** affording **S11** (43.4 mg, 0.096 mmol, 96% yield) as a white solid. M.p. = 123 °C. IR (neat): 3133 (m, br), 3077 (w), 3056 (w), 2910 (w), 2861 (w), 1643 (w), 1591 (w), 1458 (w), 1434 (m), 1182 (s), 1123 (m), 1105 (m), 1088 (m), 984 (m), 952 (m), 916 (m), 865 (m), 746 (m), 723 (s), 691 (s), 594 (m), 568 (m), 536 (s) cm<sup>-1</sup>; <sup>1</sup>H NMR (400 MHz, CDCl<sub>3</sub>): δ 7.95–7.85 (4H, m), 7.54–7.28 (11H, m), 6.56 (1H, s), 5.74 (1H, app ddt, *J* =

17.2, 10.0, 7.2 Hz), 5.19–5.08 (2H, m), 4.04–3.95 (1H, m), 3.40 (1H, br dd,  $J = 9.6, 8.4$  Hz), 2.68–2.51 (2H, m);  $^{13}\text{C}$  NMR (100 MHz,  $\text{CDCl}_3$ ):  $\delta$  135.1, 133.3, 133.0 (d,  $J = 127.0$  Hz), 132.8 (d,  $J = 9.8$  Hz), 132.2 (d,  $J = 2.7$  Hz), 132.1 (d,  $J = 2.9$  Hz), 131.9 (d,  $J = 130.0$  Hz), 131.8 (d,  $J = 9.6$  Hz), 129.7 (d,  $J = 5.4$  Hz), 129.4, 129.1, 128.7 (d,  $J = 12.5$  Hz), 128.5 (d,  $J = 12.8$  Hz), 128.2, 128.1, 118.6, 58.8, 41.3 (d,  $J = 4.3$  Hz); HRMS Calcd for  $\text{C}_{24}\text{H}_{24}\text{BrNOP}$   $[\text{M} + \text{H}]^+$ : 452.07789; Found: 452.07908.  $[\alpha]_{\text{D}}^{20} = +7.5$  ( $c = 1.00$ ,  $\text{CHCl}_3$ ) for a 98:2 er sample. The enantiomeric purity of this compound was determined by HPLC analysis in comparison with authentic racemic material (Chiracel OD–H, 92:8 hexanes:*i*-PrOH, 0.5 mL/min, 220 nm):  $t_{\text{R}}$  of **S11**: 14 min (major) and 19 min (minor).

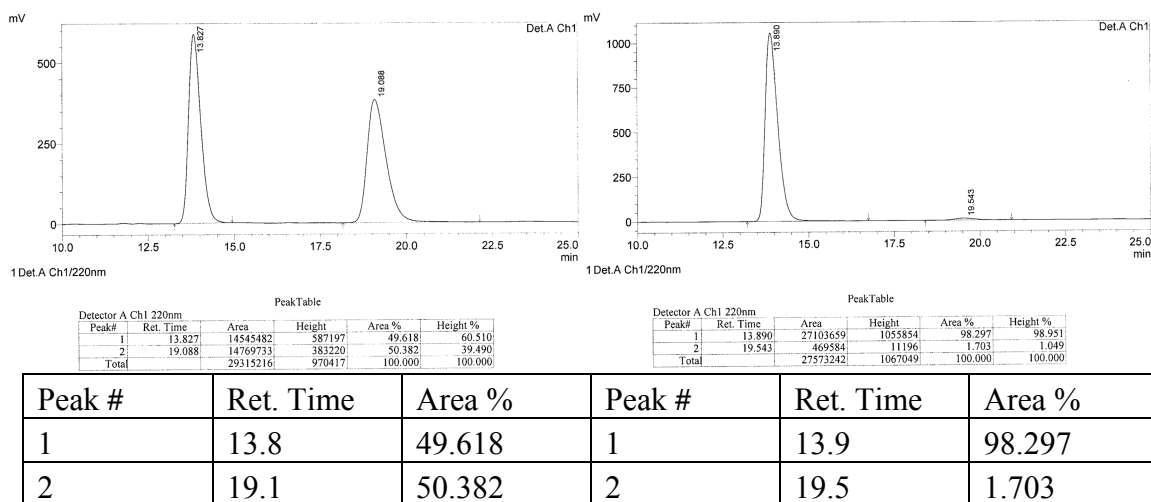

**(*R,E*)-*N*-(Nona-1,5-dien-4-yl)-*P,P*-diphenylphosphinic amide (**S12**, not shown in the manuscript, see Chart S1):** The title compound is prepared and purified analogously to **4b** from freshly prepared **6** (except 2.5 mol % aminophenol **2g** used in the reaction instead of 3.0 mol %) affording **S12** (32.7 mg, 0.096 mmol, 96% yield) as a white solid. Crystals suitable for x-ray crystallography were obtained by vapor diffusion from a dichloromethane/hexane solvent system at 22 °C See Part D of the Supplementary Information for the X-ray crystal structure. M.p. = 87 °C. IR (neat): 3121 (m, br), 3057 (w), 2953 (w), 2928 (w), 2868 (w), 1639 (w), 1590 (w), 1458 (m), 1436 (m), 1198 (m), 1182 (m), 1107 (m), 1065 (m), 966 (m), 909 (m), 753 (w), 719 (s), 691 (s), 565 (m), 524 (s)  $\text{cm}^{-1}$ ;  $^1\text{H}$  NMR (400 MHz,  $\text{CDCl}_3$ ):  $\delta$  7.94–7.83 (4H, m), 7.50–7.38 (6H, m), 5.74 (1H, dddd,  $J = 17.2, 10.4, 8.0, 6.8$  Hz), 5.50 (1H, app dtd,  $J = 15.2, 6.4, 0.8$  Hz), 5.39 (1H, app dtd,  $J = 15.6, 6.0, 1.0$  Hz), 5.15–5.07 (2H, m), 3.78–3.68 (1H, m), 2.93 (1H, br dd,  $J = 9.6, 6.0$  Hz), 2.47–2.31 (2H, m), 1.94 (2H, quartet,  $J = 6.8$  Hz), 1.33 (2H, app sextet,  $J = 7.2$  Hz), 0.86 (3H, t,  $J = 7.2$  Hz);  $^{13}\text{C}$  NMR (100 MHz,  $\text{CDCl}_3$ ):  $\delta$  134.1, 133.4 (d,  $J = 127.0$  Hz), 132.9 (d,  $J = 130.0$  Hz), 132.6 (d,  $J = 9.4$  Hz), 132.0 (d,  $J = 9.5$  Hz), 131.8 (2 d exactly overlapping,  $J = 2.5$  Hz), 131.7 (d,  $J = 5.7$  Hz), 131.5, 128.5 (d,  $J = 12.5$  Hz), 128.5 (d,  $J = 12.5$  Hz), 118.4, 52.6, 42.7 (d,  $J = 4.5$  Hz), 34.4, 22.4, 13.8; HRMS Calcd for  $\text{C}_{21}\text{H}_{27}\text{NOP}$   $[\text{M} + \text{H}]^+$ : 340.18303; Found: 340.18359.  $[\alpha]_{\text{D}}^{20} = +7.40$  ( $c = 1.00$ ,  $\text{CHCl}_3$ ) for a 98:2 er sample. The enantiomeric purity of this compound was determined by HPLC

analysis in comparison with authentic racemic material (Chiracel OD–H, 98.5:1.5 hexanes:*i*-PrOH, 0.15 mL/min, 220 nm):  $t_R$  of **S12**: 175 min (major) and 193 min (minor).

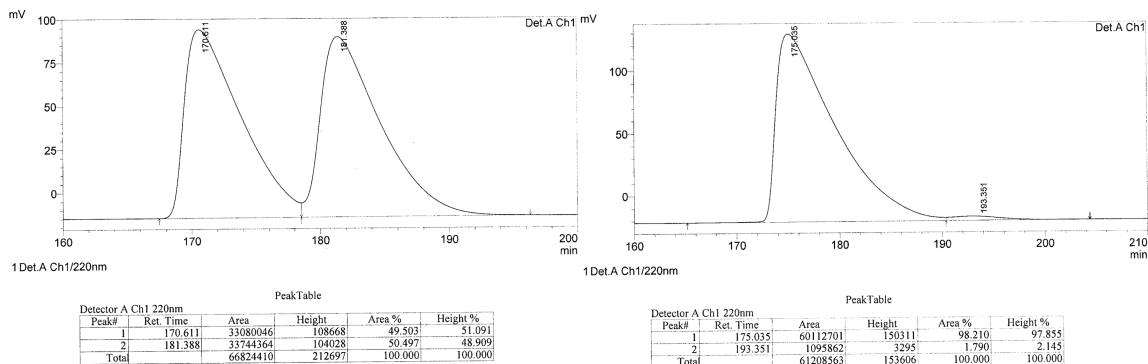

| Peak # | Ret. Time | Area % | Peak # | Ret. Time | Area % |
|--------|-----------|--------|--------|-----------|--------|
| 1      | 170.6     | 49.503 | 1      | 175.0     | 98.210 |
| 2      | 181.4     | 50.497 | 2      | 193.4     | 1.790  |

**(R)-P,P-Diphenyl-N-(1-phenylhex-5-en-1-yn-3-yl)phosphinic amide (S13, not shown in the manuscript, see Chart S1):** The title compound is purified identically to **4b** affording **S13** (33.9 mg, 0.0913 mmol, 91% yield) as a yellow solid. M.p. = 105–107 °C. IR (neat): 3132 (m, br), 3076 (w), 3055 (w), 2913 (w), 2857 (w), 1641 (w), 1591 (w), 1488 (m), 1312 (m), 1181 (s), 1125 (s), 1107 (s), 1070 (m), 945 (m), 747 (s), 725 (s), 690 (s), 530 (s)  $\text{cm}^{-1}$ ;  $^1\text{H}$  NMR (400 MHz,  $\text{CDCl}_3$ ):  $\delta$  8.04–7.99 (2H, m), 7.89–7.84 (2H, m), 7.52–7.40 (6H, m), 7.35–7.32 (2H, m), 7.32–7.24 (3H, m), 5.97 (1H, dddd,  $J = 17.0, 10.0, 7.6, 6.9$  Hz), 5.29–5.19 (2H, m), 4.31–4.23 (1H, m), 3.37 (1H, dd,  $J = 10.1, 8.3$  Hz), 2.70–2.53 (2H, m);  $^{13}\text{C}$  NMR (100 MHz,  $\text{CDCl}_3$ ):  $\delta$  133.2, 133.0 (d,  $J = 127.6$  Hz), 132.9 (d,  $J = 9.8$  Hz), 132.1 (d,  $J = 2.7$  Hz), 132.0 (d,  $J = 130.4$  Hz), 131.8 (d,  $J = 9.8$  Hz, only the peak at 131.9 is visible, the other is overlapping), 131.8, 128.8 (d,  $J = 12.6$  Hz), 128.8 (d,  $J = 12.9$  Hz), 128.4 (d,  $J = 5.5$  Hz, only the peak at 128.4 is visible, the other is overlapping), 122.9, 119.7, 89.7 (d,  $J = 8.0$  Hz), 84.1, 43.4, 42.9 (d,  $J = 3.5$  Hz); HRMS Calcd for  $\text{C}_{24}\text{H}_{23}\text{NOP} [\text{M} + \text{H}]^+$ : 372.15173; Found: 372.15177.  $[\alpha]_D^{20} = -100$  ( $c = 0.85$ ,  $\text{CHCl}_3$ ) for a 88:12 er sample. The enantiomeric purity was determined by HPLC analysis in comparison with authentic racemic material (Chiracel OD, 97:3 hexanes:*i*-PrOH, 0.8 mL/min, 220 nm):  $t_R$  of **S13**: 27 min (minor) and 30 min (major).

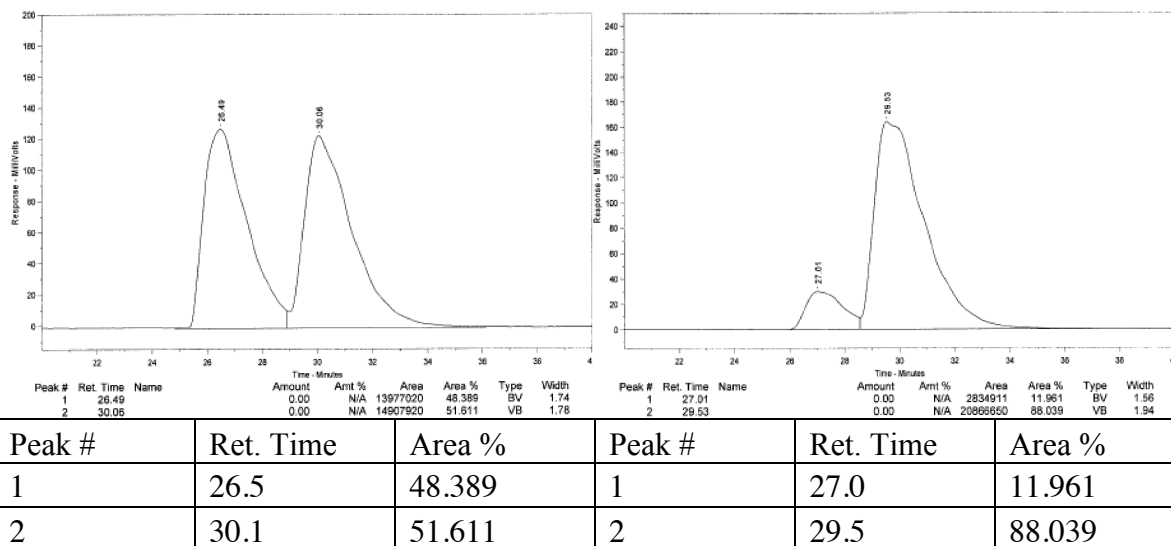

### Representative Procedure for Enantioselective Allyl Additions to Alkyl-Substituted *N*-Diphenylphosphinoyl Imines:<sup>7,8</sup>

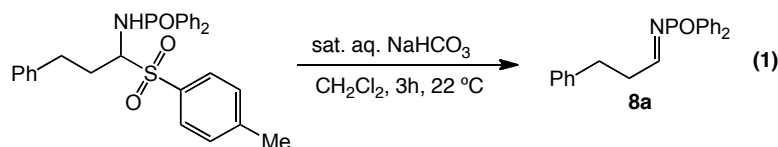

*Preparation of the alkyl-substituted aldimine:* A six-dram vial equipped with an 11 x 4 mm stir bar is charged with sulfinyl adduct (eq. 1, 0.4 mmol) to which is added CH<sub>2</sub>Cl<sub>2</sub> (8.0 mL) and a saturated aqueous solution of NaHCO<sub>3</sub> (8.0 mL) consecutively. The biphasic mixture is allowed to stir vigorously enough for the solution to be homogeneous for 3 h at 22 °C. The organic layer is separated and the aqueous phase is washed with CH<sub>2</sub>Cl<sub>2</sub> (3 x 5 mL). The combined organic layers are dried over MgSO<sub>4</sub>. The volatiles are removed under reduced pressure and the unpurified imine is azeotropically dried under vacuum with anhydrous benzene to afford aldimine **8a** as light yellow oil (>98% conversion and yield are assumed). The vessel containing **8a** is sealed with a rubber septum and anhydrous toluene (2 mL) is added to prepare a stock solution of 0.1 mmol **8a**/500. μL toluene.

*Preparation of catalyst solution (small scale):* In a nitrogen-filled glovebox (not needed for gram scale; only used when reactions are performed at mg scale to achieve highly reproducible data), aminophenol **2g** (6.9 mg, 0.023 mmol) is added to an oven-dried two-dram vial equipped with a stir bar followed by 1.5 mL of a stock solution of NaOt-Bu in toluene (9.6 mg, 0.10 mmol/8.0 mL). The vial is sealed with a cap (phenolic open top cap with a red PTFE/white silicone septa) and electrical tape and allowed to stir under nitrogen at 22 °C for ~10 minutes.

An oven-dried two-dram vial equipped with a stir bar and sealed with a cap (phenolic open top cap with a red PTFE/white silicone septa) and electrical tape is charged with toluene (100. μL), methanol (10. μL, 0.25 mmol), and allylboronic acid pinacol ester (28 μL, 0.15

mmol). To this mixture is added 500.  $\mu\text{L}$  of the stock solution of aldimine **8a** (described above), followed by 400.  $\mu\text{L}$  of the catalyst solution (described above) of [**2g** (1.82 mg, 6.00  $\mu\text{mol}$ ) and  $\text{NaOt-Bu}$  (0.48 mg, 5.0  $\mu\text{mol}$ )]. The clear and colorless solution is allowed to stir at 22  $^{\circ}\text{C}$  for four h during which time no visible change occurs. The cap is removed and 3 mL of saturated aqueous  $\text{NaIO}_4$  is added and the biphasic mixture is allowed to stir for 20 minutes. The aqueous layer is washed with ethyl acetate (4 x 4 mL), and the combined organic layers are dried over  $\text{Na}_2\text{SO}_4$  and concentrated *in vacuo*. The resulting yellow oil was purified by silica gel chromatography (10 mm diameter column slurry packed with 2.5 g of silica gel in 95:5 hexanes:triethylamine and eluted with 10 mL hexanes, 10 mL 3:1 hexanes:ethyl acetate, 10 mL 2:1 hexanes:ethyl acetate, 10 mL 1:1 hexanes:ethyl acetate, and 10 mL ethyl acetate) to afford **S14** (19.2 mg, 0.0511 mmol, 51% yield) as a white solid.

**(S)-P,P-Diphenyl-N-(1-phenylhex-5-en-3-yl)phosphinic amide (S14, not shown in the manuscript, see Chart S1):** The analytical data are fully consistent with those reported previously.  $^{13}\text{C}$   $^1\text{H}$  NMR (400 MHz,  $\text{CDCl}_3$ ):  $\delta$  7.91–7.84 (4H, m), 7.49–7.39 (6H, m), 7.24–7.19 (2H, m), 7.15–7.10 (3H, m), 5.78 (1H, dddd,  $J = 17.2, 10.4, 7.6, 7.6$  Hz), 5.14–5.09 (2H, m), 3.25–3.16 (1H, m), 2.82 (1H, br dd,  $J = 10.8, 6.4$  Hz), 2.73–2.57 (2H, m), 2.39–2.35 (2H, m), 1.86–1.80 (2H, m); HRMS Calcd for  $\text{C}_{24}\text{H}_{27}\text{NOP}$  [ $\text{M} + \text{H}$ ] $^+$ : 376.18303; Found: 376.18135.  $[\alpha]_{\text{D}}^{20} = -2.6$  ( $c = 0.43$ ,  $\text{CHCl}_3$ ) for a >99:1 er sample. The enantiomeric purity of this compound was determined by HPLC analysis in comparison with authentic racemic material (Chiracel OD-H, 95:5 hexanes:*i*-PrOH, 0.6 mL/min, 220 nm):  $t_{\text{R}}$  of **S14**: 22 min (major) and 28 min (minor).

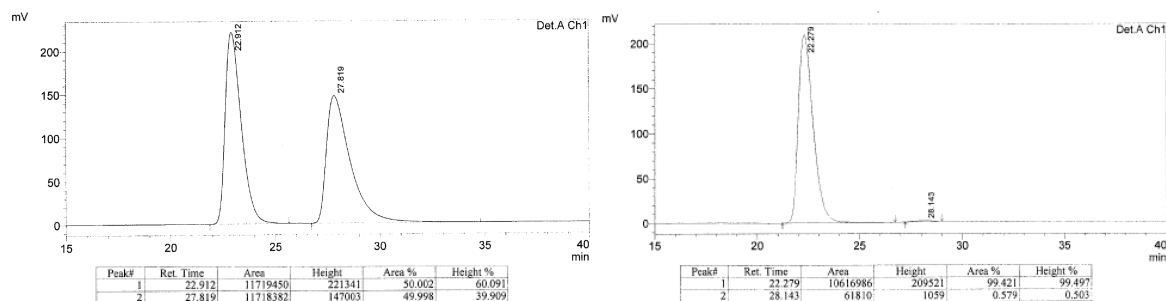

| Peak # | Ret. Time | Area % | Peak # | Ret. Time | Area % |
|--------|-----------|--------|--------|-----------|--------|
| 1      | 22.9      | 50.002 | 1      | 22.3      | 99.421 |
| 2      | 27.8      | 49.998 | 2      | 28.1      | 0.579  |

**(S)-N-(6-Methylhept-1-en-4-yl)-P,P-diphenylphosphinic amide (S15, not shown in manuscript, see Chart S1):** The title compound is purified identically to **S14**, affording **S15** (17.7 mg, 0.0540 mmol, 54% yield) as a white solid. The analytical data are fully consistent with those reported previously.  $^{13}\text{C}$   $^1\text{H}$  NMR (400 MHz,  $\text{CDCl}_3$ ):  $\delta$  7.93–7.87 (4H, m), 7.51–7.41 (6H, m), 5.79 (1H, dddd,  $J = 17.6, 10.4, 7.6, 7.6$  Hz), 5.14–5.10 (2H, m), 3.25–3.14 (1H, m), 2.75 (1H, br dd,  $J = 10.8, 6.0$  Hz), 2.39–2.28 (2H, m), 1.84–1.70 (1H, m), 1.42–1.29 (2H, m), 0.80 (3H, d,  $J = 6.6$  Hz), 0.76 (3H, d,  $J = 6.5$  Hz); HRMS Calcd

for  $C_{20}H_{27}NOP [M + H]^+$ : 328.18303; Found: 328.18398.  $[\alpha]_D^{20} = -38$  ( $c = 0.73$ ,  $CHCl_3$ ) for a 98.5:1.5 er sample. The enantiomeric purity of this compound was determined by HPLC analysis in comparison with authentic racemic material (Chiracel OD-H, 95:5 hexanes:*i*-PrOH, 0.6 mL/min, 220 nm):  $t_R$  of **S15**: 13 min (minor) and 14 min (major).

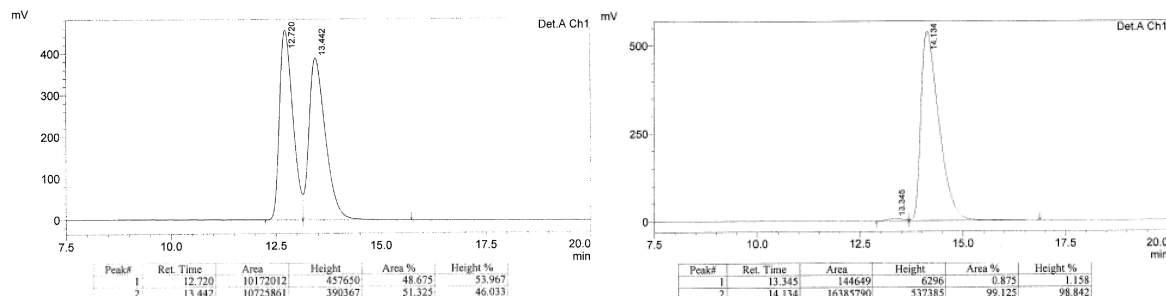

| Peak # | Ret. Time | Area % | Peak # | Ret. Time | Area % |
|--------|-----------|--------|--------|-----------|--------|
| 1      | 12.7      | 48.675 | 1      | 13.3      | 0.875  |
| 2      | 13.4      | 51.325 | 2      | 14.1      | 99.125 |

**(*R*)-*N*-(1-Cyclohexylbut-3-en-1-yl)-*P,P*-diphenylphosphinic amide (**S16**, not shown in the manuscript, see Chart S1):** The title compound is synthesized and purified identically to **S14** (except 8.5 mol % of NaOt-Bu is used in the reaction instead of 5 mol %) affording **S16** (27.2 mg, 0.0769 mmol, 77% yield) as a white solid. M.p. = 120–122 °C. IR (neat): 3207 (w, br), 3075 (w), 3057 (w), 2921 (m), 2850 (m), 1639 (w), 1436 (s), 1187 (s), 1123 (s), 1108 (s), 1067 (m), 994 (w), 909 (m), 722 (s), 694 (s), 533 (s)  $cm^{-1}$ ;  $^1H$  NMR (400 MHz,  $CDCl_3$ ):  $\delta$  7.93–7.87 (4H, m), 7.50–7.42 (6H, m), 5.77 (1H, dddd,  $J = 17.3, 10.1, 7.3, 7.3$  Hz), 5.12–5.06 (2H, m), 3.02–2.87 (1H, m), 2.77 (1H, br dd,  $J = 10.7, 6.1$  Hz), 2.09 (2H, app t,  $J = 6.5$  Hz), 1.82–1.61 (5H, m), 1.46–1.41 (1H, m), 1.24–1.15 (4H, m), 0.98–0.92 (1H, m);  $^{13}C$  NMR (100 MHz,  $CDCl_3$ ):  $\delta$  135.1, 133.3 (d,  $J = 128.7$  Hz), 133.2 (d,  $J = 129.8$  Hz, only peak at 132.8 is visible, the other is overlapping), 132.5 (d,  $J = 9.3$  Hz), 132.3 (d,  $J = 9.3$  Hz), 131.80 (d,  $J = 1.4$  Hz), 131.78 (d,  $J = 1.4$  Hz), 127.50 (d,  $J = 12.5$  Hz), 127.48 (d,  $J = 12.5$  Hz), 117.8, 55.9 (d,  $J = 2.2$  Hz), 42.1 (d,  $J = 5.1$  Hz), 38.5 (d,  $J = 4.2$  Hz), 29.5, 28.8, 26.6, 26.5, 26.4; HRMS Calcd for  $C_{22}H_{29}NOP [M + H]^+$ : 354.19868; Found: 354.19835.  $[\alpha]_D^{20} = -21$  ( $c = 0.78$ ,  $CHCl_3$ ) for a 97.5:2.5 er sample. The enantiomeric purity of this compound was determined by HPLC analysis in comparison with authentic racemic material (Chiracel OD-H, 95:5 hexanes:*i*-PrOH, 0.6 mL/min, 220 nm):  $t_R$  of **S16**: 11 min (minor) and 14 min (major).

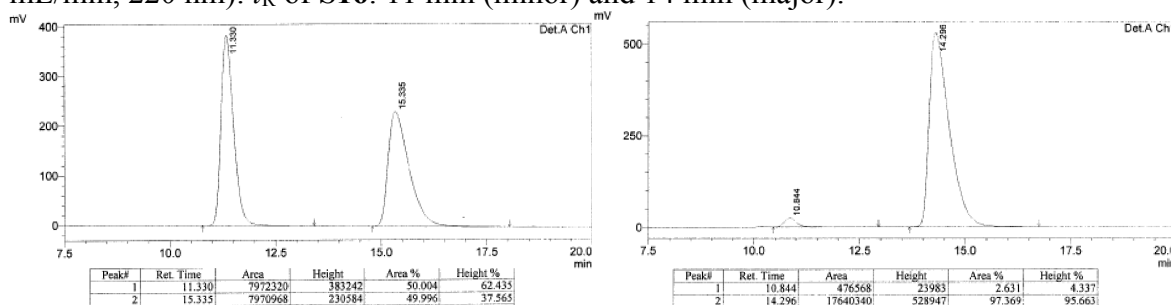



| Peak # | Ret. Time | Area % | Peak # | Ret. Time | Area % |
|--------|-----------|--------|--------|-----------|--------|
| 1      | 11.3      | 50.004 | 1      | 10.8      | 2.631  |
| 2      | 15.5      | 49.996 | 2      | 14.3      | 97.369 |

**(*R,E*)-*N*-(2-Methyl-1-(2-methylthiazol-4-yl)hexa-1,5-dien-3-yl)-*P,P*-**

**diphenylphosphinic amide (4o, Figure 4b):** Please note that the data (reaction conditions/stoichiometries, yield, e.r.) in Figure 4b of the manuscript refer to the reaction with **1a** as the nucleophile instead of *d*<sub>2</sub>-**1a**. The title compound is synthesized analogously to **4o** except for the following changes: 1) The aminophenol catalyst **2f** is employed as a catalyst instead of **2g**. 2) 20 mol % of NaOt-Bu is used in the reaction instead of 3 mol %. 3) Reaction time is six h. The product is purified by silica gel chromatography (10 mm diameter column slurry packed with 2.5 g of silica gel in 95:5 hexanes:triethylamine and eluted with 10 mL hexanes, 10 mL 1:1 hexanes:ethyl acetate, 15 mL diethyl ether, 6 mL ethyl acetate and 16 mL 5:1 ethyl acetate:MeOH) to afford **4o** (37.7 mg, 0.0923 mmol, 92% yield) as a pale yellow oil. IR (neat): 3357 (w, br), 3193 (w, br), 3076 (w), 3058 (w), 2966 (w), 2926 (w), 2871 (w), 1574 (w), 1437 (m), 1184 (s), 1121(m), 1108 (m), 952 (m), 910 (m), 723 (s), 694 (s), 525 (s) cm<sup>-1</sup>; <sup>1</sup>H NMR (400 MHz, CDCl<sub>3</sub>): δ 7.92–7.84 (4H, m), 7.40–7.37 (6H, m), 6.83 (1H, s), 6.30 (1H, s), 5.70 (1H, dddd, *J* = 17.1, 9.9, 7.2, 7.2 Hz), 5.14–5.06 (2H, m), 3.81 (1H, dddd, *J* = 9.4, 9.4, 6.6, 6.6 Hz), 3.16 (1H, dd, *J* = 9.5, 5.6 Hz), 2.69 (3H, s), 2.60–2.53 (1H, m), 2.50–2.43 (1H, m), 2.00 (3H, s); <sup>13</sup>C NMR (100 MHz, CDCl<sub>3</sub>): δ 164.5, 152.9, 139.9 (d, *J* = 5.0 Hz), 133.9, 133.1 (d, *J* = 127.6 Hz), 132.6 (d, *J* = 9.5 Hz), 132.4 (d, *J* = 131.1 Hz), 131.9 (d, *J* = 9.5 Hz), 131.9 (d, *J* = 2.8 Hz), 131.8 (d, *J* = 2.8 Hz), 128.6 (d, *J* = 12.6 Hz), 128.5 (d, *J* = 12.7 Hz), 120.2, 118.6, 115.7, 58.0, 40.4 (d, *J* = 4.3 Hz), 19.3, 15.5; HRMS Calcd for C<sub>24</sub>H<sub>26</sub>N<sub>2</sub>OPS<sub>1</sub> [M + H]<sup>+</sup>: 409.15034; Found: 409.15018. [α]<sub>D</sub><sup>20</sup> = +94 (*c* = 0.45, CHCl<sub>3</sub>) for a 95:5 er sample. The enantiomeric purity was determined by HPLC analysis in comparison with authentic racemic material (Chiracel AD, 86:14 hexanes:*i*-PrOH, 0.5 mL/min, 220 nm): *t*<sub>R</sub> of **4o**: 25 min (minor) and 35 min (major).

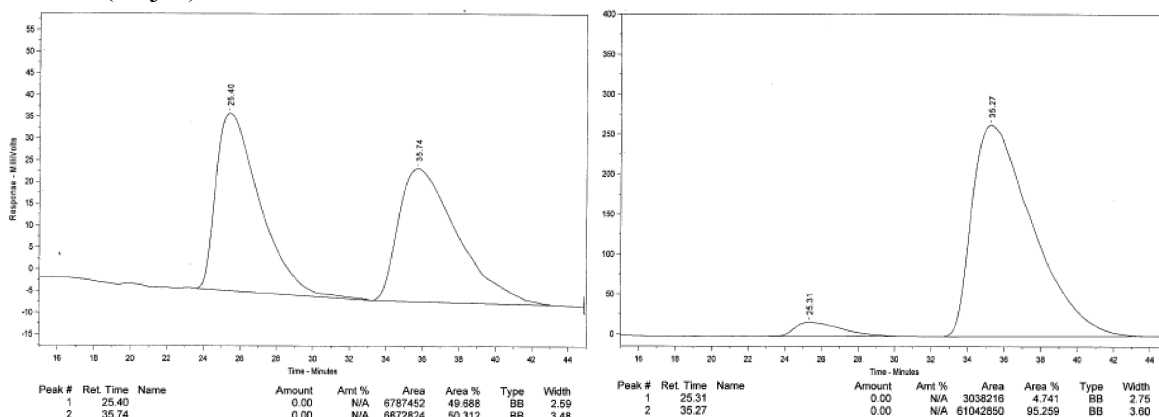

| Peak # | Ret. Time | Area % | Peak # | Ret. Time | Area % |
|--------|-----------|--------|--------|-----------|--------|
| 1      | 25.4      | 49.688 | 1      | 25.3      | 4.741  |
| 2      | 35.7      | 50.312 | 2      | 35.3      | 95.259 |

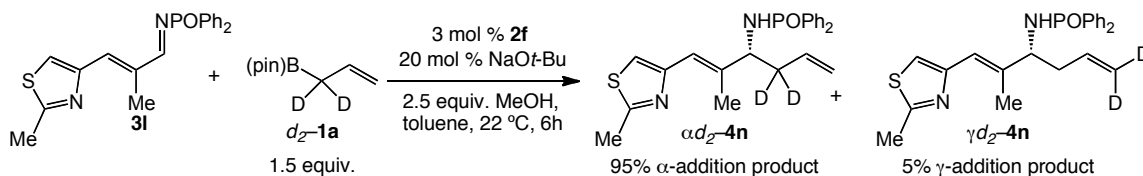

**(*R,E*)-*N*-(4,4-Dideuterio-2-methyl-1-(2-methylthiazol-4-yl)hexa-1,5-dien-3-yl)-*P,P*-diphenylphosphinic amide (*d*<sub>2</sub>-4o, Figure 4b):** The title compound is synthesized and purified analogously to **4o**, except 1,1-dideuterioallylboronic acid pinacol ester (*d*<sub>2</sub>-1a) is used as the nucleophile (contaminated with ~50% vinylboronic acid pinacol ester). The reaction proceeded to 85% conversion (based on 400 MHz <sup>1</sup>H NMR analysis and affords *d*<sub>2</sub>-4o (24.5 mg, 0.0597 mmol, 60% yield) in 95:5 α:γ addition products (see above; determined by <sup>2</sup>H NMR) as yellow oil. The following analytical data is for α addition product α-*d*<sub>2</sub>-4o, unless otherwise noted. IR (neat): 3357 (w, br), 3193 (w, br), 3076 (w), 3058 (w), 2966 (w), 2926 (w), 2871 (w), 1574 (w), 1437 (m), 1184 (s), 1121(m) 1108 (m), 910 (m), 723 (s), 694 (s), 525 (s) cm<sup>-1</sup>; <sup>1</sup>H NMR (400 MHz, CDCl<sub>3</sub>): δ 7.95–7.85 (4H, m), 7.51–7.36 (6H, m), 6.84 (1H, s), 6.31 (1H, s), 5.70 (1H, dd, *J* = 17.1, 10.1 Hz), 5.15–5.07 (2H, m), 3.79 (1H, app t, *J* = 9.6 Hz), 3.16 (1H, dd, *J* = 9.8, 5.6 Hz), 2.70 (3H, s), 2.60–2.53 (1H, m), 2.50–2.43 (γ-addition product; 0.17 H, m), 2.00 (3H, s); <sup>13</sup>C NMR (100 MHz, CDCl<sub>3</sub>): δ 164.6, 152.9, 139.9 (d, *J* = 5.1 Hz), 133.8, 133.0 (d, *J* = 127.7 Hz), 132.6 (d, *J* = 9.5 Hz), 132.4 (d, *J* = 131.1 Hz), 132.0 (d, *J* = 9.5 Hz), 132.0 (d, *J* = 2.9 Hz), 131.9 (d, *J* = 2.6 Hz), 128.6 (d, *J* = 12.6 Hz), 128.5 (d, *J* = 12.7 Hz), 120.2, 118.7, 115.7, 57.9, 40.4–39.2 (m), 19.4, 15.5; <sup>2</sup>H NMR (76 MHz, 9:1 CHCl<sub>3</sub>:CDCl<sub>3</sub>): δ 5.22–5.08 (γ-addition product; 0.09H, m), 2.51 (α-addition product; 2H, d, *J* = 6.1 Hz); HRMS Calcd for C<sub>24</sub>H<sub>24</sub>D<sub>2</sub>N<sub>2</sub>OPS [M + H]<sup>+</sup>: 411.16290; Found: 411.16232. [α]<sub>D</sub><sup>20</sup> = +47 (*c* = 0.73, CHCl<sub>3</sub>) for a 95:5 er sample. The enantiomeric purity was determined by HPLC analysis in comparison with authentic racemic material (Chiracel AD-H, 86:14 hexanes:*i*-PrOH, 0.5 mL/min, 254 nm): *t*<sub>R</sub> of *d*<sub>2</sub>-4o: 25 min (minor) and 35 min (major).

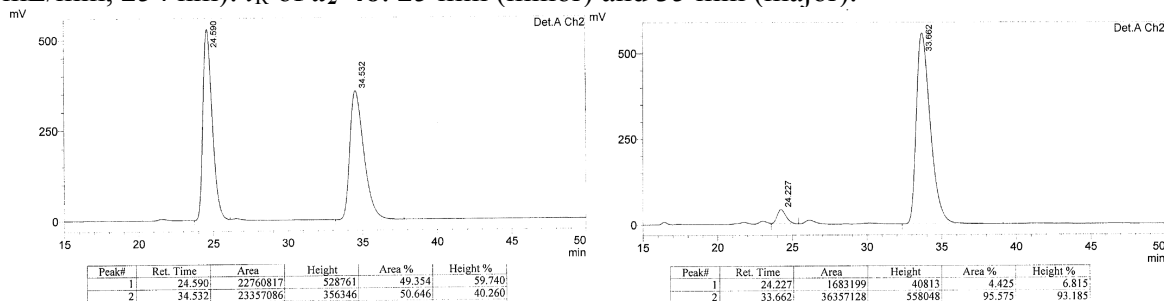

| Peak # | Ret. Time | Area % | Peak # | Ret. Time | Area % |
|--------|-----------|--------|--------|-----------|--------|
| 1      | 24.6      | 49.354 | 1      | 24.2      | 4.425  |
| 2      | 34.5      | 50.646 | 2      | 33.7      | 95.575 |

■ **Representative Procedure for Enantioselective Allyl Additions with Enantiomerically Enriched Allylboronates (Figure 4c):** *Preparation of catalyst solution and allylboronate Solution:* Under an atmosphere of nitrogen, aminophenol **2g** (6.1 mg, 0.02 mmol) is added to an oven-dried two-dram vial equipped with a stir bar followed by 1.0 mL of a stock solution of NaOt-Bu in toluene (9.6 mg, 0.010 mmol/6.0 mL) and the solution is allowed to stir at 22 °C for ~10 minutes. In a separate oven-dried two-dram vial, allylboronate **S-9** (70.8 mg, 0.260. mmol) and MeOH (17.5  $\mu$ L, 0.690. mmol) are dissolved in 700.  $\mu$ L of toluene to make a stock solution of **S-9** and MeOH.

An oven-dried one-dram vial equipped with a stir bar is charged with phenyl-substituted aldimine **3a** (15.3 mg, 50.0  $\mu$ mol), 150.  $\mu$ L of toluene, and 200.  $\mu$ L of the prenominate stock solution of **S-9** (20 mg, 74  $\mu$ mol) and MeOH (4.0 mg, 13  $\mu$ mol). To this mixture is added 150.  $\mu$ L of the catalyst solution (described above) of **2g** (0.92 mg, 3.0  $\mu$ mol) and NaOt-Bu (0.24 mg, 2.5  $\mu$ mol) and a cap is attached to the vial and sealed with electrical tape. The clear and colorless solution is allowed to stir at 22 °C for 18 hours during which time it becomes cloudy and white. The cap is removed and 3 mL of a saturated aqueous solution of NaIO<sub>4</sub> is added and the biphasic mixture is allowed to stir for 20 minutes. The aqueous layer is washed with ethyl acetate (4 x 4 mL), dried over Na<sub>2</sub>SO<sub>4</sub>, and concentrated *in vacuo* to provide a yellow solid. The homoallylamide product was purified by silica gel chromatography (10 mm diameter column slurry packed with 2.5 g of silica gel in 95:5 hexanes:triethylamine and eluted with 10 mL hexanes, 10 mL 1:1 hexanes:diethyl ether, 30 mL 1:3 hexanes:diethyl ether, 35 mL diethyl ether, 30 mL 4:1 diethyl ether:ethyl acetate) to afford **10** (19.3 mg, 0.0427 mmol, 85% yield of a 85:15 ratio of diastereomers) as an off white solid, which is re-crystallized from CH<sub>2</sub>Cl<sub>2</sub>/hexanes (vapor diffusion, 22 °C) to give 6.4 mg (0.014 mmol, 28% yield) of **10** as clear, colorless, needles suitable for X-ray crystallography in >20:1 dr and >99:1 er (See Part D of the Supplementary Information for the X-ray crystal structure). This diastereo- and enantiomerically enriched product was used to obtain the data given below (excluding the HPLC chromatographs). The HPLC chromatograph of the authentic racemic material was obtained from a 60:40 ratio of anti:syn diastereomers (enriched by silica gel chromatography). The excess of the anti diastereomer allowed assignment of which peak corresponds to which diastereomer. The identity and absolute stereochemistry of the major enantiomer of the major diastereomer is determined by X-Ray crystallography.

***N*-((1*R*,2*R*)-2-Phenethyl-1-phenylbut-3-en-1-yl)-*P,P*-diphenylphosphinic amide (**10**, Figure 4c):** M.p. = 156–158 °C. IR (neat): 3228 (w, br), 3059 (w), 3027 (w), 2916 (w), 2857 (w), 1437 (w), 1187 (m), 1125 (m), 1109 (m), 1069 (m), 917 (m), 745 (m), 723 (m), 692 (s), 534 (s) cm<sup>-1</sup>; <sup>1</sup>H NMR (400 MHz, CDCl<sub>3</sub>):  $\delta$  7.82–7.77 (2H, m), 7.64–7.59 (2H, m), 7.50–7.46 (1H, m), 7.40–7.33 (3H, m), 7.21–7.12 (8H, m), 7.04–7.02 (4H, m), 5.73 (1H, ddd, *J* = 17.5, 10.1, 9.1 Hz), 5.28 (1H, d, *J* = 10.3 Hz), 5.11 (1H, d, *J* = 17.1 Hz), 4.17 (1H, app dd, *J* = 18.2, 8.0 Hz), 3.37 (1H, app t, *J* = 7.1 Hz), 2.62 (1H, ddd, *J* = 14.2, 9.4, 5.3 Hz), 2.50–2.43 (1H, m), 2.40–2.33 (1H, m), 1.76–1.68 (1H, m), 1.63–1.53 (1H, m);

$^{13}\text{C}$  NMR (100 MHz,  $\text{CDCl}_3$ ):  $\delta$  142.6 (d,  $J = 3.1$  Hz), 142.0, 138.8, 133.5 (d,  $J = 127.2$  Hz), 132.7 (d,  $J = 9.7$  Hz, only peak at 132.6 is visible, the other is overlapping), 132.1 (d,  $J = 130.7$  Hz, only peak at 131.4 is visible, the other is overlapping), 131.9 (d,  $J = 2.6$  Hz), 131.8 (d,  $J = 9.6$  Hz), 131.6 (d,  $J = 2.8$  Hz), 128.6 (d,  $J = 12.5$  Hz), 128.6, 128.4, 128.2, 128.1 (d,  $J = 12.8$  Hz), 127.4, 127.1, 125.8, 118.8, 58.1, 51.1 (d,  $J = 5.5$  Hz), 33.3, 32.1; HRMS Calcd for  $\text{C}_{30}\text{H}_{31}\text{NOP} [\text{M} + \text{H}]^+$ : 452.21433; Found: 452.21249.  $[\alpha]_D^{20} = +12$  ( $c = 0.43$ ,  $\text{CHCl}_3$ ) for a >20:1 dr, >99:1 er sample. The enantiomeric purity of this compound was determined by HPLC analysis in comparison with authentic racemic material (Chiracel AZ-H, 90:10 hexanes:*i*-PrOH, 0.8 mL/min, 220 nm):  $t_R$  of **10** (anti diastereomer): 37 min (major) and 41 min (minor);  $t_R$  of **10** (syn diastereomer): 26 min (major) and 45 min (minor).

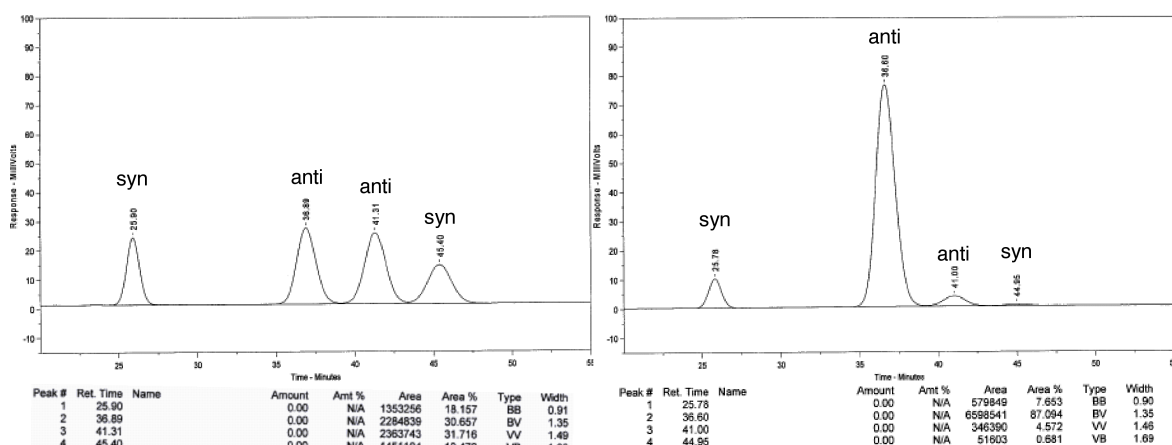

| Peak #   | Ret. Time | Area % | Peak #   | Ret. Time | Area % |
|----------|-----------|--------|----------|-----------|--------|
| 1 (syn)  | 25.9      | 18.157 | 1 (syn)  | 25.8      | 7.653  |
| 2 (anti) | 36.9      | 30.657 | 2 (anti) | 36.6      | 87.094 |
| 3 (anti) | 41.3      | 31.716 | 3 (anti) | 41.0      | 4.572  |
| 4 (syn)  | 45.4      | 19.470 | 4 (syn)  | 45.0      | 0.681  |

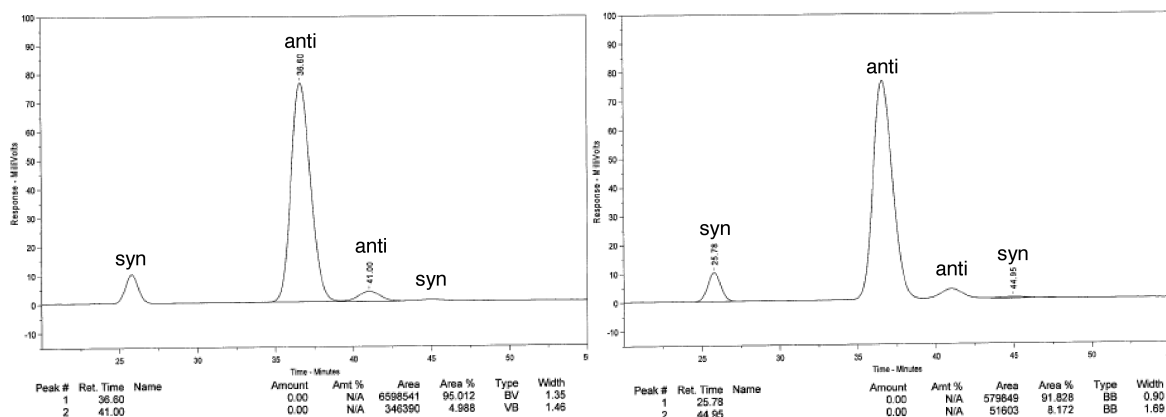

| Peak #   | Ret. Time | Area % | Peak #  | Ret. Time | Area % |
|----------|-----------|--------|---------|-----------|--------|
| 1 (anti) | 36.6      | 95.012 | 1 (syn) | 25.8      | 91.828 |
| 2 (anti) | 41.0      | 4.988  | 2 (syn) | 45.0      | 8.172  |

To measure the enantiomeric purity of **S-9**, allylboronate **S-9** was oxidized by hydrogen peroxide to the corresponding alcohol. The enantiomeric purity of allylboronate **S-9** was determined by GLPC analysis in comparison with authentic racemic material (Betadex 120 column, 110 °C, 15 psi).

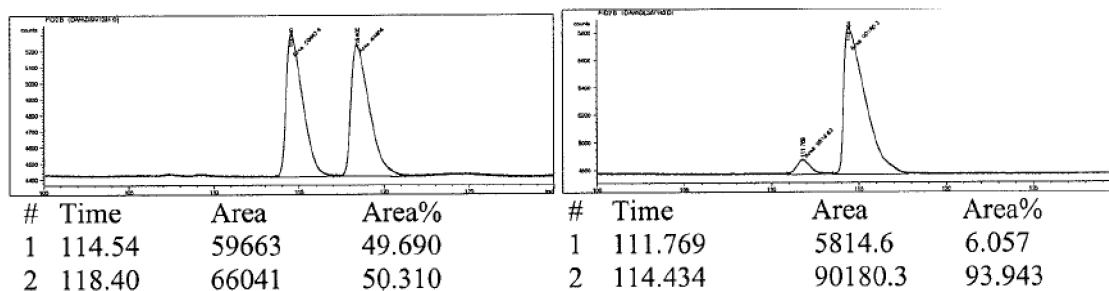

**N-((1R,2S)-2-Phenethyl-1-phenylbut-3-en-1-yl)-P,P-diphenylphosphinic amide (11, Figure 4c):** The title compound is purified analogously to **10** affording **11** (22.5 mg, 0.0498 mmol, >98 % yield of a 85:15 ratio of diastereomers) as a white solid. The resulting solid was recrystallized from CH<sub>2</sub>Cl<sub>2</sub>/hexanes (vapor diffusion, 22 °C) to give 7.4 mg (0.016 mmol, 32% yield) of **11** as clear, colorless needles suitable for x-ray crystallography in >20:1 dr and >99:1 er. This diastereo- and enantiomerically enriched product was used to obtain the data given below (excluding the HPLC chromatographs). The identity (and absolute stereochemistry of the major enantiomer) of the major diastereomer is determined by X-Ray crystallography (see Part D of the Supplementary Information). M.p. = 161–163 °C. IR (neat): 3215 (w, br), 3056 (w), 3027 (w), 2912 (w), 2855 (w), 1494 (m), 1184 (m), 1122 (m), 1106 (m), 1083 (m), 912 (m), 749 (m), 691 (s), 531 (s) cm<sup>-1</sup>; <sup>1</sup>H NMR (400 MHz, CDCl<sub>3</sub>): δ 7.84–7.79 (2H, m), 7.67–7.62 (2H, m), 7.51–7.47 (1H, m), 7.42–7.36 (3H, m), 7.26–7.20 (7H, m), 7.15–7.12 (1H, m), 7.07–7.00 (4H, m), 5.49 (1H, ddd, *J* = 17.3, 10.0, 10.0 Hz), 5.30–5.26 (2H, m), 4.22 (1H, ddd, *J* = 11.1, 11.1, 4.7 Hz), 3.67 (1H, dd, *J* = 10.7, 6.4 Hz), 2.68–2.61 (1H, m), 2.58–2.42 (2H, m), 1.76 (1H, dddd, *J* = 13.5, 9.9, 6.3, 3.6 Hz), 1.29–1.19 (1H, m); <sup>13</sup>C NMR (100 MHz, CDCl<sub>3</sub>): δ 142.3, 140.9 (d, *J* = 5.4 Hz), 137.6, 133.5 (d, *J* = 127.5 Hz, only peak at 134.1 is visible, the other is overlapping), 132.8 (d, *J* = 9.8 Hz, only peak at 132.7 is visible, the other is overlapping), 132.0 (d, *J* = 2.7 Hz), 131.9 (d, *J* = 131.7 Hz), 131.77 (d, *J* = 9.6 Hz), 131.78 (d, *J* = 2.8 Hz), 128.6 (d, *J* = 12.5 Hz), 128.5, 128.4, 128.3 (d, *J* = 12.8 Hz), 128.0, 127.8, 127.2, 125.9, 120.0, 58.0, 52.1 (d, *J* = 3.1 Hz), 34.2, 33.9; HRMS Calcd for C<sub>30</sub>H<sub>31</sub>NOP [M + H]<sup>+</sup>: 452.21433; Found: 452.21376. [α]<sub>D</sub><sup>20</sup> = –16 (c = 0.20) for a >20:1 dr and >99:1 er sample. The enantiomeric purity of this compound was determined by HPLC analysis in comparison with authentic racemic material; see explanation of peak assignment in the analytical data for compound **10** (Chiracel AZ-H, 90:10 hexanes:*i*-PrOH,

0.8 mL/min, 220 nm):  $t_R$  of **11** (major diastereomer): 25 min (major) and 42 min (minor);  $t_R$  of **11** (minor diastereomer): 35 min (major) and 38 min (minor).

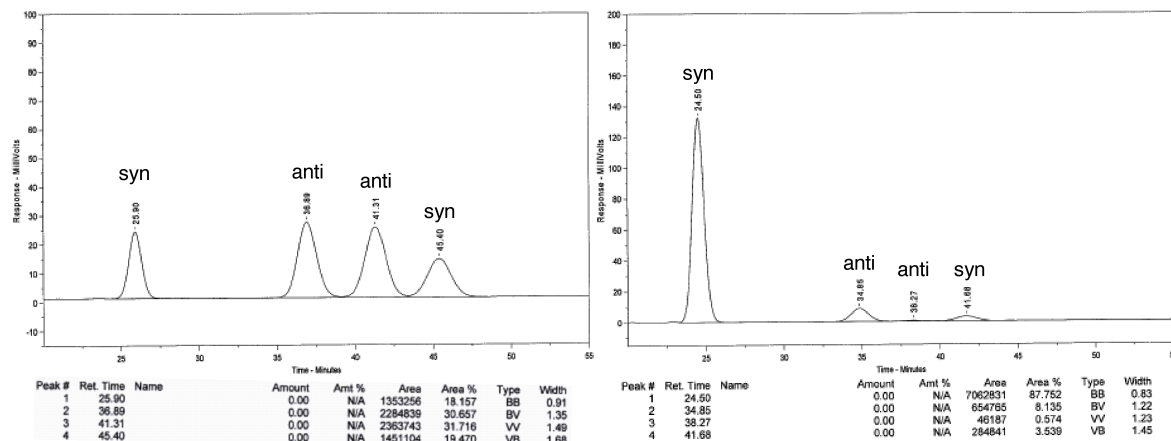

| Peak #   | Ret. Time | Area % | Peak #   | Ret. Time | Area % |
|----------|-----------|--------|----------|-----------|--------|
| 1 (syn)  | 25.9      | 18.157 | 1 (syn)  | 24.5      | 87.752 |
| 2 (anti) | 36.9      | 30.657 | 2 (anti) | 34.9      | 8.135  |
| 3 (anti) | 41.3      | 31.716 | 3 (anti) | 38.3      | 0.574  |
| 4 (syn)  | 45.4      | 19.470 | 4 (syn)  | 41.7      | 3.539  |

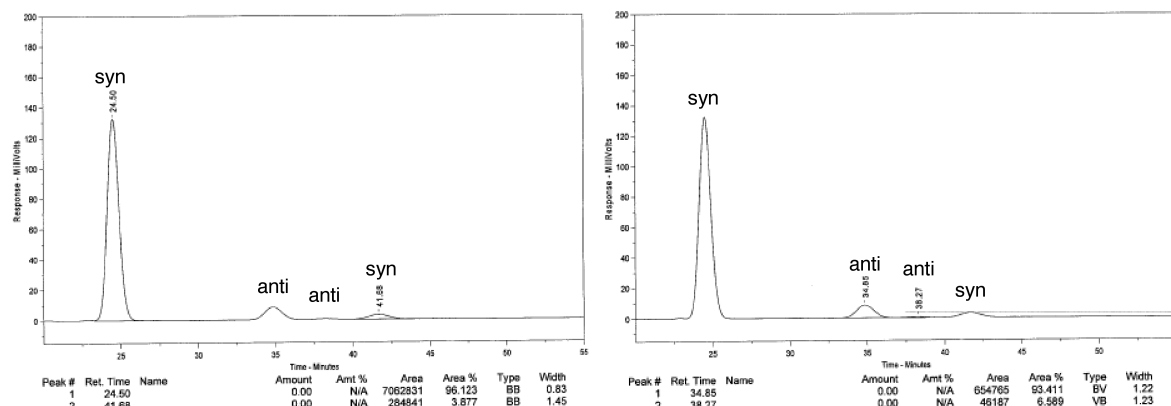

| Peak #  | Ret. Time | Area % | Peak #   | Ret. Time | Area % |
|---------|-----------|--------|----------|-----------|--------|
| 1 (syn) | 24.5      | 96.123 | 1 (anti) | 34.9      | 93.411 |
| 2 (syn) | 41.7      | 3.877  | 2 (anti) | 38.3      | 6.589  |

To measure the enantiomeric purity of **R-9**, allylboronate **R-9** was oxidized by hydrogen peroxide to the corresponding alcohol. The enantiomeric purity of allylboronate **R-9** was determined by GLPC analysis in comparison with authentic racemic material (Betadex 120 column, 110 °C, 15 psi).

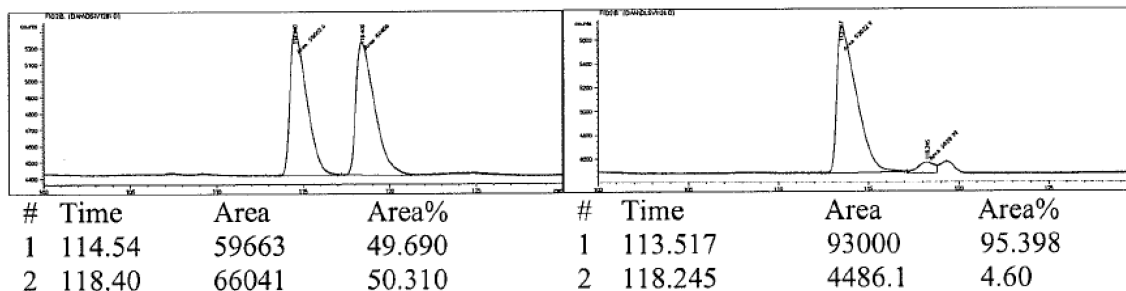

***N*-((1*S*,2*R*)-2-Cyclohexyl-2-methyl-1-phenylbut-3-en-1-yl)-*P,P*-diphenylphosphinic amide (**13**, Figure 4c):** The title compound is synthesized in the manner identical to that used for the preparation of **10** (except when utilizing Zn(*O**t*-Bu)<sub>2</sub> instead of Na*O**t*-Bu). The homoallylamide **13** is purified by silica gel chromatography (10 mm diameter column slurry packed with 2.5 g of silica gel in 95:5 hexanes:triethylamine and eluted with 10 mL hexanes, 10 mL 1:1 hexanes:diethyl ether, 30 mL 1:3 hexanes:diethyl ether, 60 mL diethyl ether) to afford **13** (17.0 mg, 0.038 mmol, 76 % yield of isolated major diastereomer) as a white solid. Crystals suitable for X-ray crystallography were obtained by vapor diffusion from a diethyl ether/hexane solvent system at 22 °C. The identity (and absolute stereochemistry of the major enantiomer) of the major diastereomer is determined by X-ray crystallography (see Part D of the Supplementary Information). M.p. = 137–139 °C. IR (neat): 3221 (w, br), 3058 (w), 2924 (s), 2851 (m), 1452 (m), 1184 (s), 1123 (s), 1108 (s), 1064 (m), 912 (m), 723 (s), 698 (s), 530 (s) cm<sup>-1</sup>; <sup>1</sup>H NMR (400 MHz, CDCl<sub>3</sub>): δ 7.79–7.74 (2H, m), 7.51–7.45 (3H, m), 7.41–7.38 (2H, m), 7.34–7.30 (1H, m), 7.23–7.20 (3H, m), 7.15 (2H, app ddd, *J* = 7.7, 7.7, 3.2 Hz), 7.00–6.98 (2H, m), 5.70 (1H, dd, *J* = 17.7, 11.0 Hz), 5.27 (1H, dd, *J* = 10.9, 1.4 Hz), 5.13 (1H, dd, *J* = 17.7, 1.4 Hz), 4.17 (1H, app t, *J* = 11.2 Hz), 3.56 (1H, app t, *J* = 9.8 Hz), 1.81 (1H, d, *J* = 12.9 Hz), 1.67 (1H, d, *J* = 10.8 Hz), 1.60–1.53 (2H, m), 1.36 (1H, d, *J* = 6.9 Hz), 1.22 (3H, s), 1.10–0.67 (6H, m); <sup>13</sup>C NMR (100 MHz, CDCl<sub>3</sub>): δ 143.0, 141.9 (d, *J* = 3.3 Hz) 133.7 (d, *J* = 128.3 Hz), 132.8 (d, *J* = 9.9 Hz), 132.0 (d, *J* = 131.8 Hz), 131.83 (d, *J* = 3.1 Hz, only peak at 131.81 is visible, the other is overlapping), 131.79 (d, *J* = 9.4 Hz, only peak at 131.74 is visible, the other is overlapping), 131.5 (d, *J* = 2.8 Hz), 128.6 (d, *J* = 12.4 Hz), 128.4, 128.0 (d, *J* = 12.8 Hz), 127.7, 126.9, 115.9, 59.4, 48.5 (d, *J* = 3.8 Hz), 42.8, 29.1, 27.9, 27.1, 26.9, 26.6, 15.8; HRMS Calcd for C<sub>29</sub>H<sub>35</sub>NOP [M + H]<sup>+</sup>: 444.24563; Found: 444.24499. [α]<sub>D</sub><sup>20</sup> = +8.9 (*c* = 0.87, CHCl<sub>3</sub>) for a 95:5 er sample. The enantiomeric purity of this compound was determined by HPLC analysis in comparison with authentic racemic material (Chiracel AD-H, 90:10 hexanes:*i*-PrOH, 1.0 mL/min, 220 nm): *t*<sub>R</sub> of **13**: 7.0 min (major) and 20 min (minor).

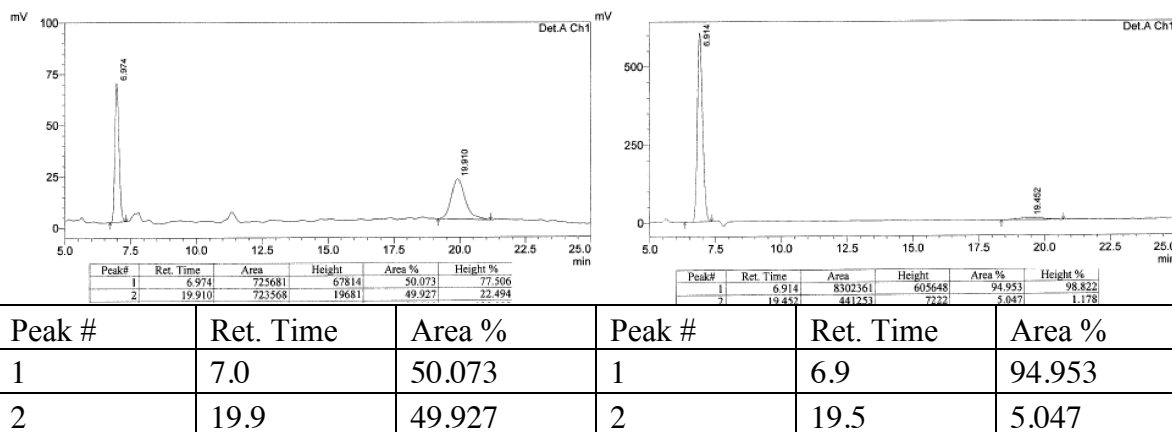

To measure the enantiomeric purity of **12**, allylboronate **12** was oxidized by hydrogen peroxide to the corresponding alcohol. The enantiomeric purity of allylboronate **12** was determined by GLPC analysis in comparison with authentic racemic material (Chiral dex CD-BDM column, 140 °C, 15 psi).

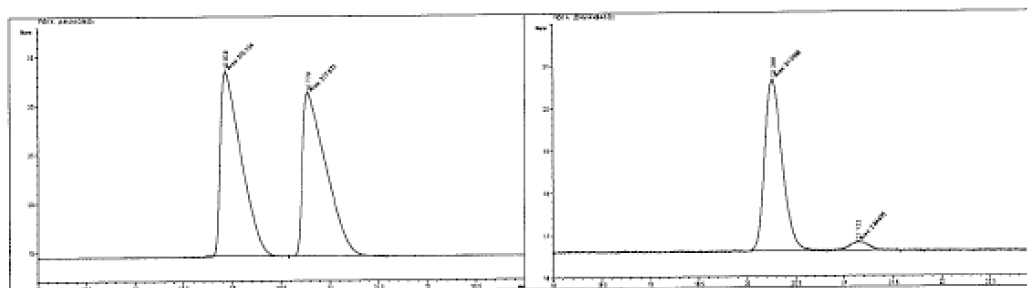

| # | Time   | Area  | Area%  | # | Time   | Area | Area%  |
|---|--------|-------|--------|---|--------|------|--------|
| 1 | 19.929 | 276.1 | 49.861 | 1 | 20.266 | 51.1 | 94.727 |
| 2 | 20.779 | 277.7 | 50.139 | 2 | 21.133 | 2.8  | 5.273  |

■ **Representative Procedure for *Small Scale* Catalytic Enantioselective Allyl Additions to Isatins (Figure 5a):** Under an atmosphere of N<sub>2</sub>, aminophenol **2g** (6.1 mg, 0.020 mmol) is added to an oven-dried two dram vial equipped with a stir bar followed by 2.0 mL of a stock solution of NaOt-Bu in toluene (7.7 mg, 0.080 mmol/8.0 mL). The vial is sealed with a cap (phenolic open top cap with a red PFTE/white silicone septa) and electrical tape, removed from the glovebox and allowed to stir under nitrogen at 22 °C for ~10 minutes.

A separate vial equipped with a stir bar is charged with *N*-TBS-isatin **14a** (26.2 mg, 0.100 mmol), sealed with a cap (phenolic open top cap with a red PFTE/white silicone septa) and electrical tape and purged with N<sub>2</sub>. To this sealed vial under nitrogen is added toluene (0.95 mL), 50. uL of a catalyst solution [described above; **2g** (0.16 mg, 0.50 mmol) and NaOt-Bu (0.048 mg, 0.50 mmol)], MeOH (10 μL, 0.25 mmol) and allylboronic acid pinacol ester **1a** (28 μL, 0.15 mmol) by syringe in the stated order. The clear yellow solution is allowed to stir at 22 °C for 1.5 h during which time it becomes colorless, which signifies complete consumption of the highly pigmented starting material **14a**.



**Removal of the TBS group:** The cap is removed and the mixture is concentrated *in vacuo*. The resultant pale yellow oil is then dissolved in a solution of *p*-toluenesulfonic acid monohydrate (22.8 mg, 0.120 mmol) in methanol (0.5 mL, Fisher ACS grade). The mixture is allowed to stir at 22 °C for 3 h after which time 1 mL of a saturated solution of aqueous NaHCO<sub>3</sub> is added drop-wise over one minute. Ethyl acetate (1 mL) is subsequently added, the organic and the aqueous layers are separated, which are then washed with ethyl acetate (3 x 1 mL). The combined organic layers are dried over Na<sub>2</sub>SO<sub>4</sub> and concentrated *in vacuo* to provide a white solid that is purified by silica gel chromatography (10 mm diameter column slurry packed with 2.5 g of silica gel in hexanes. The off-white solid residue is dry loaded on silica gel and eluted with 10 mL 4:1 hexanes:ethyl acetate, 20 mL 2:1 hexanes:ethyl acetate, 20 mL 1:1 hexanes:ethyl acetate) to afford **15a** (17.5 mg, 0.0925 mmol, 98% yield) as a white solid. Crystals suitable for X-ray crystallography (see Part D of the Supplementary Information) were grown by slow evaporation from methanol at 22 °C.

**(R)-3-Allyl-3-hydroxyindolin-2-one (15a, Figure 5a):** The analytical data are fully consistent with those reported previously.<sup>14</sup> <sup>1</sup>H NMR (400 MHz, CD<sub>3</sub>OD): δ 7.36 (1H, d, *J* = 7.2 Hz), 7.26 (1H, t, *J* = 8.5 Hz), 7.07 (1H, t, *J* = 7.4 Hz), 6.89 (1H, d, *J* = 7.7 Hz) 5.54 (1H, app dq, *J* = 16.7, 8.1 Hz), 5.05–4.98 (2H, m), 2.76–2.59 (2H, m); HRMS Calcd for C<sub>11</sub>H<sub>12</sub>N<sub>1</sub>O<sub>2</sub> [M + H]<sup>+</sup>: 190.08680; Found: 190.08650. [α]<sub>D</sub><sup>20</sup> = +11 (*c* = 1.3, CHCl<sub>3</sub>) for a 98:2 er sample. The enantiomeric purity of this compound was determined by HPLC analysis in comparison with authentic racemic material (Chiracel OD-H, 90:10 hexanes:*i*-PrOH, 0.8 mL/min, 220 nm): *t*<sub>R</sub> of **15a**: 12 min (minor) and 15 min (major).

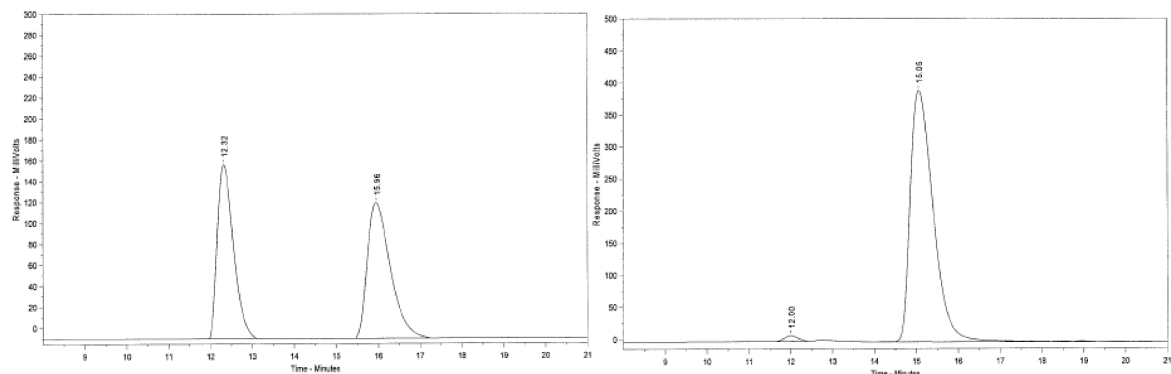

| Peak # | Ret. Time | Area % | Peak # | Ret. Time | Area % |
|--------|-----------|--------|--------|-----------|--------|
| 1      | 12.3      | 47.660 | 1      | 12.0      | 1.303  |
| 2      | 16.0      | 52.340 | 2      | 15.1      | 98.697 |

**(R)-3-Allyl-1-(tert-butyldimethylsilyl)-3-hydroxyindolin-2-one (S17, not shown in manuscript, see Chart S1):** To obtain the *N*-TBS protected hydroxyl-oxindole, after concentration *in vacuo*, the resultant pale yellow oil can be purified by silica gel

chromatography (10 mm diameter column slurry packed with 2.5 g of silica gel in dichloromethane and eluted with 10 mL dichloromethane followed by 30 mL 20:1 dichloromethane:diethyl ether) to afford **S17** (30.4 mg, 0.100 mmol, >98% yield) as pale yellow oil. IR (neat): 3401 (w, br), 2953 (w), 2929 (w), 2858 (w), 1701 (s), 1613 (m), 1465 (s), 1255 (s), 1171 (s), 1105 (m), 945 (m), 824 (s), 732 (s)  $\text{cm}^{-1}$ ;  $^1\text{H}$  NMR (400 MHz,  $\text{CDCl}_3$ ):  $\delta$  7.36 (1H, dd,  $J = 7.4, 1.4$  Hz), 7.22 (1H, td,  $J = 7.8, 1.5$  Hz), 7.05 (1H, td,  $J = 7.5, 0.8$  Hz), 6.99 (1H, d,  $J = 8.0$  Hz), 5.54 (1H, dddd,  $J = 16.9, 10.1, 8.5, 6.2$  Hz), 5.10–5.04 (2H, m), 2.96 (1H, s), 2.72–2.57 (2H, m), 0.99 (9H, s), 0.51 (3H, s), 0.50 (3H, s);  $^{13}\text{C}$  NMR (100 MHz,  $\text{CDCl}_3$ ):  $\delta$  185.3, 145.8, 131.6, 130.9, 129.4, 124.4, 122.7, 120.3, 113.2, 76.3, 43.9, 26.6, 19.8, –3.1, –3.3; HRMS Calcd for  $\text{C}_{17}\text{H}_{26}\text{NO}_2\text{Si} [\text{M} + \text{H}]^+$ : 304.17328; Found: 304.17280.  $[\alpha]_D^{20} = +24.2$  ( $c = 1.5$ ,  $\text{CHCl}_3$ ) for a 94:6 er sample. The enantiomeric purity of this compound was determined by HPLC analysis in comparison with authentic racemic material (Chiracel AD-H, 90:10 hexanes:*i*-PrOH, 0.8 mL/min, 220 nm):  $t_R$  of **S17**: 7 min (major) and 9 min (minor).

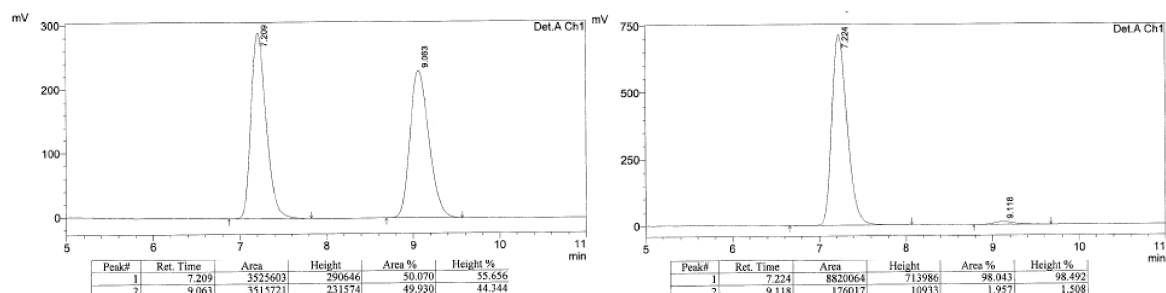

| Peak # | Ret. Time | Area % | Peak # | Ret. Time | Area % |
|--------|-----------|--------|--------|-----------|--------|
| 1      | 7.2       | 50.070 | 1      | 7.2       | 98.043 |
| 2      | 9.1       | 49.930 | 2      | 9.1       | 1.957  |

**(R)-3-Allyl-4,6-dibromo-3-hydroxyindolin-2-one (15b, Figure 5a)**: The enantioselective allyl addition to SEM-isatin **14b** is carried out following the representative procedure for aminophenol catalyzed enantioselective allyl additions to isatins. The procedure for removal of SEM group is as follows. After 2.0 h, the mixture of the enantioselective allyl addition turns from yellow to colorless (signifying complete consumption of highly pigmented **14b**), the cap is removed and the reaction mixture is concentrated *in vacuo*. The resultant pale yellow oil is transferred to a two-dram vial, sealed with a septum and purged with nitrogen. A separate oven dried one-dram vial equipped with a stir bar is charged with  $\text{MgBr}_2 \cdot \text{Et}_2\text{O}$  (96.8 mg, 0.375 mmol), sealed with a cap (phenolic open top cap with a red PTFE/white silicone septa) and electrical tape, and removed from the glovebox. The unpurified 3-allyl-3-hydroxy oxindole **S18** is transferred through a syringe to the vial containing  $\text{MgBr}_2 \cdot \text{Et}_2\text{O}$  using 3 x 300  $\mu\text{L}$  of dichloromethane. The mixture is allowed to stir under nitrogen at 22  $^\circ\text{C}$  for 60 h during which time it becomes a tan slurry. The cap is removed and the tan slurry is dissolved in methanol and passed through a short plug of Celite®; the plug is washed with methanol (15 mL) and the combined solution is concentrated *in vacuo* to afford a tan solid. The resulting solid is dissolved in 1 mL of

methanol and 2 mL of a solution of saturated aqueous NaHCO<sub>3</sub>, and the cloudy light pink solution is allowed to stir open to the air at 22 °C for five h. Ethyl acetate (2 mL) is added and the layers separate. The aqueous layer is extracted with 3 x 2 mL of ethyl acetate and the combined organic layers are dried over Na<sub>2</sub>SO<sub>4</sub> and concentrated *in vacuo* to afford a light tan solid. The hydroxyoxindole product is purified by silica gel chromatography (10 mm diameter column slurry packed with 2.5 g of silica gel in dichloromethane and eluted with 15 mL dichloromethane followed by 10 mL 9:1 dichloromethane:diethyl ether, 10 mL 8:1 dichloromethane:diethyl ether, and 30 mL 4:1 dichloromethane:diethyl ether), affording **15b** (14.9 mg, 0.0429 mmol, 86% yield) as a white solid. The analytical data are fully consistent with those reported previously.<sup>15</sup> IR (neat): 3368 (m, br), 3169 (w, br), 2923 (w, br), 1703 (s), 1605 (s), 1572 (s), 1429 (m), 1364 (m), 1334 (m), 1300 (m), 1175 (m), 1086 (m), 1074 (m), 944 (m), 928 (m), 840 (s), 785 (m), 738 (m), 673 (s) cm<sup>-1</sup>; <sup>1</sup>H NMR (400 MHz, CD<sub>3</sub>OD): δ 7.38 (1H, s), 7.02 (1H, s), 5.39–5.28 (1H, m), 5.09–5.05 (1H, m), 4.97–4.94 (1H, m), 3.26–3.21 (1H, m), 2.72–2.67 (1H, m), 3.24–3.19 (1H, m), 2.92 (1H, br s), 2.84–2.79 (1H, m), 0.91 (2H, t, *J* = 8.0 Hz), –0.02 (9H, s); HRMS Calcd for C<sub>11</sub>H<sub>10</sub>NO<sub>2</sub>Br<sub>2</sub> [M + H]<sup>+</sup>: 347.90578; Found: 347.90587. [α]<sub>D</sub><sup>20</sup> = –10 (*c* = 0.64, CH<sub>3</sub>OH) for a 91.5:8.5 er sample. The enantiomeric purity of this compound was determined by HPLC analysis in comparison with authentic racemic material (Chiracel AD-H, 86:14 hexanes:*i*-PrOH, 0.5 mL/min, 220 nm): *t*<sub>R</sub> of **15b**: 16 min (minor) and 21 min (major).

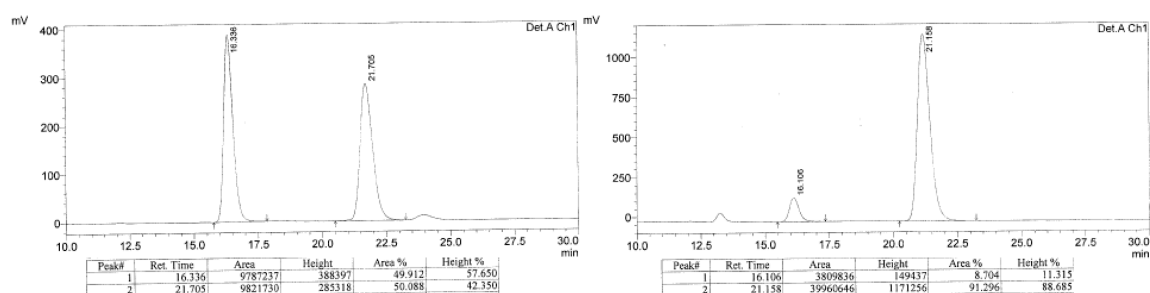

| Peak # | Ret. Time | Area % | Peak # | Ret. Time | Area % |
|--------|-----------|--------|--------|-----------|--------|
| 1      | 16.3      | 49.912 | 1      | 16.1      | 8.704  |
| 2      | 21.7      | 50.088 | 2      | 21.2      | 91.296 |

**(R)-3-Allyl-4,6-dibromo-3-hydroxy-1-((2-(trimethylsilyl)ethoxy)methyl)indolin-2-one (S18, not shown in the manuscript, see Chart S1):** If one wishes to obtain the *N*-SEM-protected hydroxyl-oxindole, then after concentration *in vacuo*, purify the resultant yellow oil by silica gel chromatography (10 mm diameter column slurry packed with 2.5 g of silica gel in dichloromethane and eluted with 40 mL dichloromethane) to afford **S18** (23.0 mg, 0.0481 mmol, 96% yield) as a clear, colorless oil. IR (neat): 3400 (w, br), 3082 (w), 2953 (w), 2923 (w), 2895 (w), 1723 (m), 1597 (s), 1571 (m), 1249 (m), 1077 (s, br), 1010 (m), 922 (m), 857 (m), 831 (s) cm<sup>-1</sup>; <sup>1</sup>H NMR (400 MHz, CDCl<sub>3</sub>): δ 7.41 (1H, s), 7.16 (1H,

s), 5.34 (1H, dddd,  $J = 17.0, 17.0, 8.4, 8.4$  Hz), 5.16–5.10 (2H, m), 5.00–4.97 (2H, m), 3.56–3.46 (2H, m), 3.24–3.19 (1H, m), 2.92 (1H, br s), 2.84–2.79 (1H, m), 0.91 (2H, t,  $J = 8.0$  Hz),  $-0.02$  (9H, s);  $^{13}\text{C}$  NMR (100 MHz,  $\text{CDCl}_3$ ):  $\delta$  176.6, 145.0, 129.9, 129.6, 126.2, 124.2, 121.0, 120.0, 112.9, 78.1, 70.0, 66.6, 40.1, 17.9,  $-1.3$ ; HRMS Calcd for  $\text{C}_{18}\text{H}_{24}\text{NO}_3\text{NaSiBr}_2$   $[\text{M} + \text{Na}]^+$ : 497.97062; Found: 497.97090.  $[\alpha]_D^{20} = +5.6$  ( $c = 1.1$ ,  $\text{CHCl}_3$ ) for a 91.5:8.5 er sample. The enantiomeric purity of this compound was determined by HPLC analysis in comparison with authentic racemic material (Chiracel OJ-H, 95:5 hexanes:*i*-PrOH, 0.5 mL/min, 220 nm):  $t_R$  of **S18**: 9 min (major) and 20 min (minor).

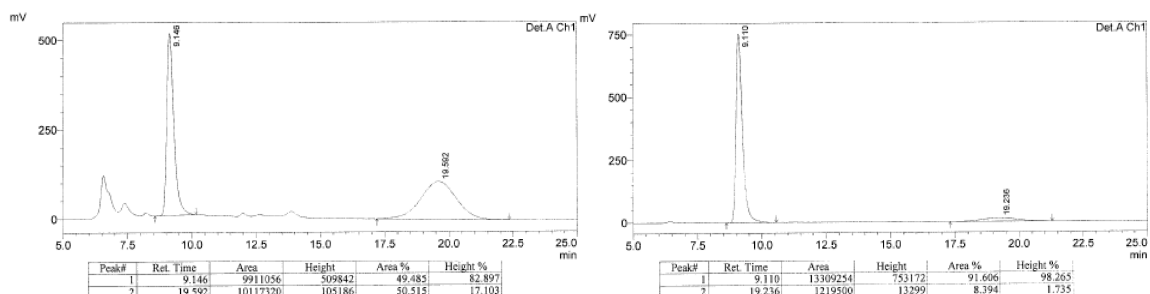

| Peak # | Ret. Time | Area % | Peak # | Ret. Time | Area % |
|--------|-----------|--------|--------|-----------|--------|
| 1      | 9.1       | 49.485 | 1      | 9.1       | 91.606 |
| 2      | 19.6      | 50.515 | 2      | 19.2      | 8.394  |

**(R)-3-Allyl-1-(tert-butyldimethylsilyl)-3-hydroxy-5-methoxyindolin-2-one (16, Figure 5a):** The title compound is synthesized in the same manner as described for **S17** (except reaction time is four h) and purified by silica gel chromatography (10 mm diameter column slurry packed with 2.5 g of silica gel in dichloromethane and eluted with 10 mL dichloromethane, 15 mL 30:1 dichloromethane:diethyl ether, 30 mL 20:1 dichloromethane:diethyl ether), affording *N*-TBS-protected hydroxyoxindole **16** (31.2 mg, 0.0932 mmol, 93% yield) as a pale orange oil. IR (neat): 3400 (w, br), 2953 (w), 2930 (w), 2858 (w), 1699 (s), 1594 (m), 1482 (s), 1255 (s), 1197 (s), 1120 (w), 1081 (m), 911 (m), 840 (s), 790 (m), 730 (s)  $\text{cm}^{-1}$ ;  $^1\text{H}$  NMR (400 MHz,  $\text{CDCl}_3$ ):  $\delta$  6.96 (1H, d,  $J = 2.8$  Hz), 6.89 (1H, d,  $J = 8.7$  Hz), 6.75 (1H, app dd,  $J = 8.7, 2.7$  Hz), 5.54 (1H, dddd,  $J = 16.9, 10.1, 9.0, 6.1$  Hz), 5.11–5.07 (2H, m), 3.79 (3H, s), 2.99 (1H, s), 2.70–2.56 (2H, m), 0.98 (9H, s), 0.50 (3H, s), 0.48 (3H, s);  $^{13}\text{C}$  NMR (100 MHz,  $\text{CDCl}_3$ ):  $\delta$  185.2, 155.8, 138.9, 132.8, 130.8, 120.3, 114.5, 113.7, 110.7, 76.7, 55.9, 44.0, 26.6, 19.8,  $-3.2, -3.4$ ; HRMS Calcd for  $\text{C}_{18}\text{H}_{28}\text{NO}_3\text{Si}$   $[\text{M} + \text{H}]^+$ : 334.18384; Found: 334.18318.  $[\alpha]_D^{20} = +11$  ( $c = 1.3$ ,  $\text{CHCl}_3$ ) for a 98:2 er sample. The enantiomeric purity of this compound was determined by HPLC analysis in comparison with authentic racemic material (Chiracel AD-H, 90:10 hexanes:*i*-PrOH, 0.8 mL/min, 254 nm):  $t_R$  of **16**: 9 min (major) and 12 min (minor).

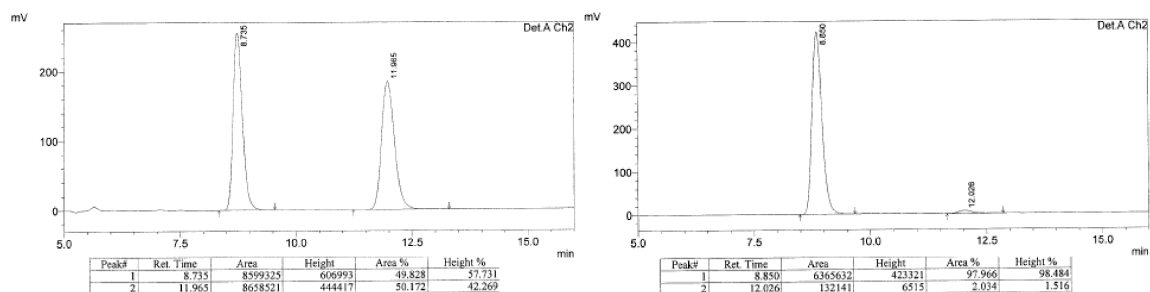

| Peak # | Ret. Time | Area % | Peak # | Ret. Time | Area % |
|--------|-----------|--------|--------|-----------|--------|
| 1      | 8.7       | 49.828 | 1      | 8.9       | 97.966 |
| 2      | 12.0      | 50.172 | 2      | 12.0      | 2.034  |

**(R)-3-Allyl-1-benzyl-3-hydroxy-5-methylindolin-2-one (17, Figure 5a):** The title compound is synthesized in the same manner as that described for **S17** except for the following changes: 1) Reaction time is two h. 2) The catalytic enantioselective allyl addition is quenched with 3 mL of a solution of saturated aqueous NaIO<sub>4</sub> (to remove excess pinacol) and allowed to stir for 14 h at 22 °C. The aqueous layer is washed with ethyl acetate (4 x 4 mL) and the combined organic layers are dried over Na<sub>2</sub>SO<sub>4</sub> and concentrated *in vacuo* to provide yellow oil. The product **17** is purified by silica gel chromatography (10 mm diameter column slurry packed with 2.5 g of silica gel in hexanes and eluted with 10 mL hexanes, 10 mL 6:1 hexanes:ethyl acetate, and 20 mL 4:1 hexanes:ethyl acetate), affording **17** (24.5 mg, 0.084 mmol, 84% yield) as an off-white solid. The analytical data are fully consistent with those reported previously.<sup>16</sup> <sup>1</sup>H NMR (400 MHz, CDCl<sub>3</sub>): δ 7.31–7.22 (6H, m), 6.99 (1H, d, *J* = 7.9 Hz), 6.57 (1H, d, *J* = 8.0 Hz), 5.69–5.58 (1H, m), 5.18–5.09 (2H, m), 4.99 and 4.70 (2H, ABq, *J*<sub>AB</sub> = 15.7 Hz), 3.18 (1H, br s), 2.83–2.78 (1H, m), 2.73–2.68 (1H, m), 2.31 (3H, s); HRMS Calcd for C<sub>19</sub>H<sub>20</sub>NO<sub>2</sub> [M + H]<sup>+</sup>: 294.14940; Found: 294.14905. [α]<sub>D</sub><sup>20</sup> = +5.1 (*c* = 0.95, CHCl<sub>3</sub>) for a 98.5:1.5 er sample. The enantiomeric purity of this compound was determined by HPLC analysis in comparison with authentic racemic material (Chiracel OJ-H, 90:10 hexanes:*i*-PrOH, 0.8 mL/min, 220 nm): *t*<sub>R</sub> of **15b**: 13 min (major) and 16 min (minor).

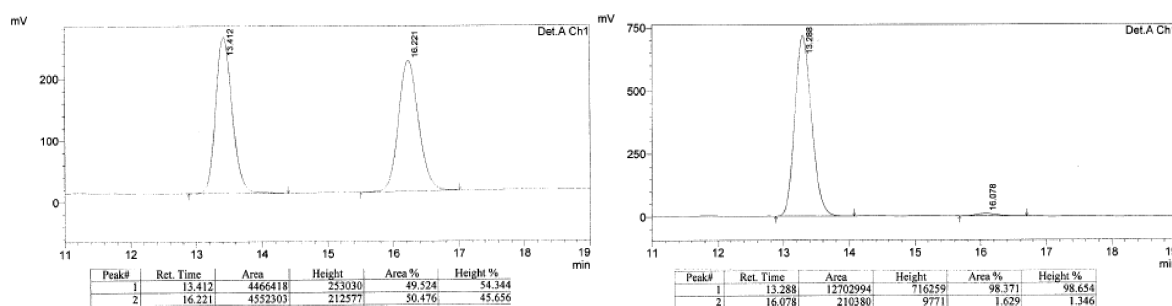

| Peak # | Ret. Time | Area % | Peak # | Ret. Time | Area % |
|--------|-----------|--------|--------|-----------|--------|
| 1      | 13.4      | 49.524 | 1      | 13.3      | 98.654 |
| 2      | 16.2      | 50.476 | 2      | 16.1      | 1.346  |

**(R)-1-Benzyl-3-hydroxy-3-(2-methylallyl)indolin-2-one (18, Figure 5a):** The title compound is synthesized in the same manner as described for **S17** except for the following changes: 1) Reaction time is one h. 2) Allylboronate **1b** is employed as the nucleophile instead of allylboronate **1a**. 3) The catalytic enantioselective allyl addition process is quenched with 3 mL of a solution of saturated aqueous NaIO<sub>4</sub> (to remove excess pinacol) and allowed to stir for 14 h at 22 °C. The aqueous layer is washed with ethyl acetate (4 x 4 mL), dried over Na<sub>2</sub>SO<sub>4</sub>, and concentrated *in vacuo* to provide yellow oil. The product is purified by silica gel chromatography (10 mm diameter column slurry packed with 2.5 g of silica gel in dichloromethane and eluted with 34 mL dichloromethane followed by 26 mL 9:1 dichloromethane:ethyl acetate), affording **18** (28.7 mg, 0.0976 mmol, 98% yield) as a white solid. M.p. = 52–54 °C. IR (neat): 3399 (w, br), 3366 (w, br), 1692 (s), 1614 (m), 1466 (m), 1350 (m), 1196 (m), 991 (m), 756 (s), 727 (s) cm<sup>-1</sup>; <sup>1</sup>H NMR (400 MHz, CDCl<sub>3</sub>): δ 7.41 (1H, d, *J* = 7.3 Hz), 7.31–7.22 (5H, m), 7.20 (1H, t, *J* = 7.7 Hz), 7.06 (1H, t, *J* = 7.5 Hz), 6.69 (1H, d, *J* = 7.7 Hz), 5.02 and 4.72 (2H, ABq, *J*<sub>AB</sub> = 15.7 Hz), 4.79 (1H, s), 4.68 (1H, s), 2.93 (1H, s), 2.77 (2H, s), 1.50 (3H, s); <sup>13</sup>C NMR (100 MHz, CDCl<sub>3</sub>): δ 178.0, 142.9, 139.1, 135.5, 129.9, 129.8, 128.9, 127.8, 127.4, 124.6, 123.1, 116.5, 109.6, 76.5, 46.3, 44.0, 24.1; HRMS Calcd for C<sub>19</sub>H<sub>20</sub>NO<sub>2</sub> [M + H]<sup>+</sup>: 294.14940; Found: 294.14930. [α]<sub>D</sub><sup>20</sup> = +22 (*c* = 1.3, CHCl<sub>3</sub>) for a 96:4 er sample. The enantiomeric purity of this compound was determined by HPLC analysis in comparison with authentic racemic material (Chiracel OJ-H, 90:10 hexanes:*i*-PrOH, 0.8 mL/min, 220 nm): *t*<sub>R</sub> of **15e**: 15 min (major) and 34 min (minor).

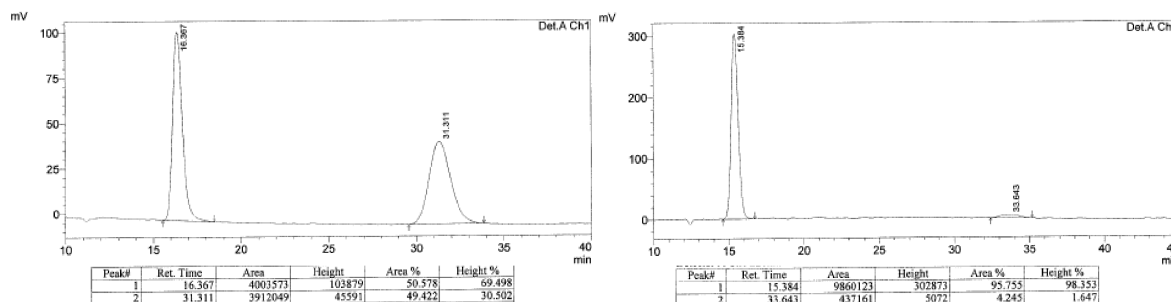

| Peak # | Ret. Time | Area % | Peak # | Ret. Time | Area % |
|--------|-----------|--------|--------|-----------|--------|
| 1      | 16.4      | 50.578 | 1      | 15.4      | 95.755 |
| 2      | 31.3      | 49.422 | 2      | 33.6      | 4.245  |

■ **Representative Procedure for *Small Scale* Catalytic Enantioselective Allene Group Additions to Isatins (Figure 5c):** An oven-dried vial equipped with a stir bar is charged with aminophenol **2g** (6.1 mg, 20 μmol) and NaO*t*-Bu (1.9 mg, 20. μmol). The vial is sealed with a septum and Teflon tape and purged with N<sub>2</sub>. Anhydrous toluene (2.0 mL) is added and the mixture is allowed to stir for 10 min under N<sub>2</sub> at 22 °C. A separate oven-dried vial equipped with a stir bar is charged with isatin **14c** (53.4 mg, 0.200 mmol). The vial is sealed with a septum and Teflon tape and purged with N<sub>2</sub>. Toluene (600. μL) and MeOH (8.1 μL, 0.20 mmol) are then transferred by syringe to the vial containing isatin

**14c.** An appropriate portion of the stock solution of catalyst (100.  $\mu\text{L}$ ) is transferred to the vial. Allenyl boron **19** (50.0  $\mu\text{L}$ , 0.140 mmol) is added by syringe and the mixture was allowed to stir at 22 °C until the solution becomes colorless indicating complete consumption of the highly pigmented isatin. The mixture is diluted with AcOEt and passed through a short column of silica gel. The unpurified residue obtained as a pale yellow oil was purified by silica gel chromatography (a gradient from 100%  $\text{CH}_2\text{Cl}_2$  to 1:1  $\text{Et}_2\text{O}:\text{CH}_2\text{Cl}_2$  to 100 %  $\text{Et}_2\text{O}$ ) to yield 56.0 mg (0.182 mmol, 91% yield) of pure **20a** as a white crystalline solid in 98.5:1.5 er.

**(R)-1-Benzyl-3-hydroxy-5-methoxy-3-(propa-1,2-dien-1-yl)indolin-2-one (20a, Figure 5c):** white crystalline solid: M.p. = 117–119 °C. IR (neat): 3366 (m, br), 1697 (s), 1604 (w), 1490 (s), 1435 (m), 1346 (m), 1179 (m), 1017 (m), 853 (m), 730 (m), 697 (m)  $\text{cm}^{-1}$ ;  $^1\text{H}$  NMR (400 MHz,  $\text{CDCl}_3$ ):  $\delta$  7.33–7.24 (5H, m), 7.03 (1H, d,  $J = 2.4$  Hz), 6.73 (1H, dd,  $J = 8.4, 2.8$  Hz), 6.60 (1H, d,  $J = 8.4$  Hz), 5.55 (1H, t,  $J = 6.4$  Hz), 5.01 (2H, dd,  $J = 6.4, 1.2$  Hz), 4.93 and 4.72 (2H, ABq,  $J_{\text{AB}} = 15.8$  Hz), 3.76 (3H, s), 3.36 (1H, br s);  $^{13}\text{C}$  NMR (100 MHz,  $\text{CDCl}_3$ ):  $\delta$  207.8, 176.6, 156.4, 135.5, 135.4, 130.9, 128.9, 127.8, 127.3, 114.7, 111.7, 110.3, 93.1, 80.2, 75.1, 55.9, 44.0; HRMS Calcd for  $\text{C}_{19}\text{H}_{18}\text{NO}_3$   $[\text{M} + \text{H}]^+$ : 308.12867; Found: 308.12935.  $[\alpha]_D^{20} = -37.6$  ( $c = 1.00$ ,  $\text{CHCl}_3$ ) for a 98.5:1.5 er sample. The enantiomeric purity of this compound was determined by HPLC analysis in comparison with authentic racemic material (Chiracel OD, 92:8 hexanes:*i*-PrOH, 0.8 mL/min, 220 nm):  $t_{\text{R}}$  of **20a**: 17 min (major) and 21 min (minor),  $t_{\text{R}}$  of corresponding propargyl adduct: 19 min (major) and 25 min (minor).

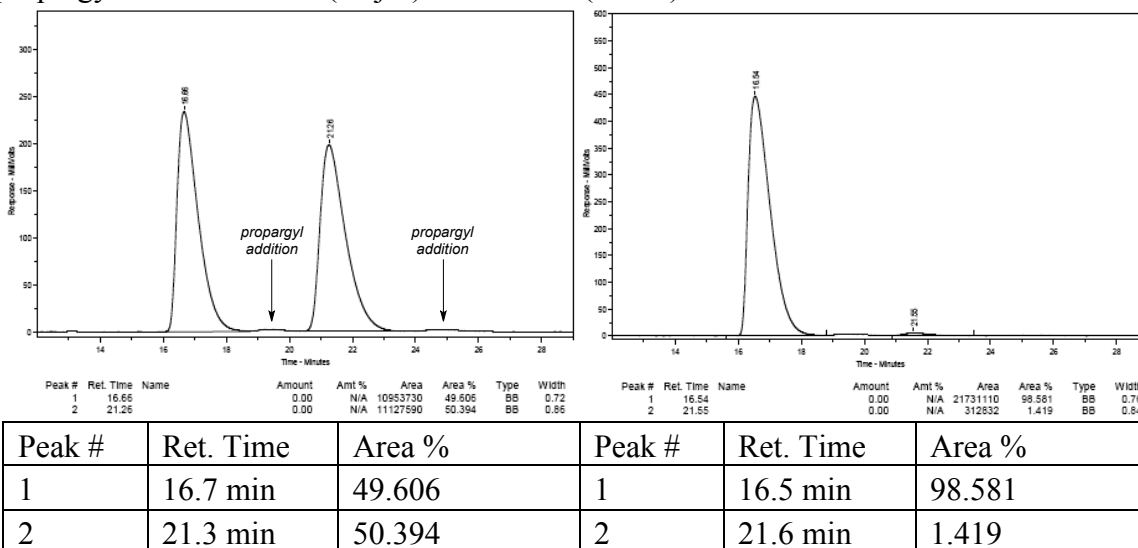

■ **Representative Procedure for Gram Scale Catalytic Enantioselective Allene Group Additions to Isatins (Figure 5c):** An oven-dried vial equipped with a stir bar is charged with aminophenol **2g** (11.6 mg, 38.  $\mu\text{mol}$ ) and  $\text{NaOt-Bu}$  (3.6 mg, 38  $\mu\text{mol}$ ). The vial is sealed with a septum and Teflon tape and purged with  $\text{N}_2$ . Anhydrous toluene (2.0 mL) is added and the mixture is allowed to stir for 10 min under  $\text{N}_2$  at 22 °C. A separate flame-dried 50 mL round bottom flask equipped with a stir bar is charged with isatin **14d** (1.015

g, 3.800 mmol). The flask is sealed with a septum and Teflon tape and purged with N<sub>2</sub>. Toluene (14.0 mL) and MeOH (307 μL, 7.60 mmol) are then transferred by syringe to the flask containing isatin **14d**. An appropriate portion of the stock solution of catalyst (1.00 mL) is transferred to the flask. Allenyl boron **19** (750. μL, 4.17 mmol) is added by syringe and the mixture is allowed to stir at 22 °C until the solution becomes colorless indicating complete consumption of the highly pigmented isatin (4.0 h). The reaction mixture is concentrated and the unpurified residue obtained as pale yellow oil is purified by silica gel chromatography (a gradient from 100% CH<sub>2</sub>Cl<sub>2</sub> to 1:1 Et<sub>2</sub>O:CH<sub>2</sub>Cl<sub>2</sub> to 100 % Et<sub>2</sub>O) to yield 1.056 g (3.43 mmol, 90% yield) of pure **20b** as a foamy white solid in 96:4 er.

**(R)-3-Hydroxy-1-(4-methoxybenzyl)-3-(propa-1,2-dien-1-yl)indolin-2-one (20b, Figure 5c):** clear oil. IR (neat): 3367 (m, br), 1701 (s), 1612 (m), 1512 (m), 1467 (m), 1350 (m), 1246 (m), 1175 (m), 1031 (m), 810 (m), 749 (m) cm<sup>-1</sup>; <sup>1</sup>H NMR (400 MHz, CDCl<sub>3</sub>): δ 7.41–7.39 (1H, m), 7.23–7.19 (3H, m), 7.08–7.04 (1H, m), 6.85–6.81 (2H, m), 6.73 (1H, d, *J* = 7.6 Hz), 5.55 (1H, t, *J* = 6.4 Hz), 4.98 (2H, d, *J* = 6.8 Hz), 4.92 and 4.73 (2H, ABq, *J*<sub>AB</sub> = 15.6 Hz), 3.76 (3H, s), 3.43 (1H, br s); <sup>13</sup>C NMR (100 MHz, CDCl<sub>3</sub>): δ 207.8, 176.6, 159.3, 142.3, 129.9, 129.6, 128.7, 127.5, 124.8, 123.3, 114.3, 109.8, 93.0, 80.3, 74.7, 55.4, 43.5; HRMS Calcd for C<sub>19</sub>H<sub>18</sub>NO<sub>2</sub> [M + H]<sup>+</sup>: 292.13375; Found: 292.13468. [α]<sub>D</sub><sup>20</sup> = -2.92 (*c* = 1.00, CHCl<sub>3</sub>) for a 96:4 er sample. The enantiomeric purity of this compound was determined by HPLC analysis in comparison with authentic racemic material (Chiracel OD, 95:5 hexanes:*i*-PrOH, 0.8 mL/min, 220 nm): *t*<sub>R</sub> of **20b**: 31 min (minor) and 38 min (major), *t*<sub>R</sub> of corresponding propargyl adduct: 36 min.

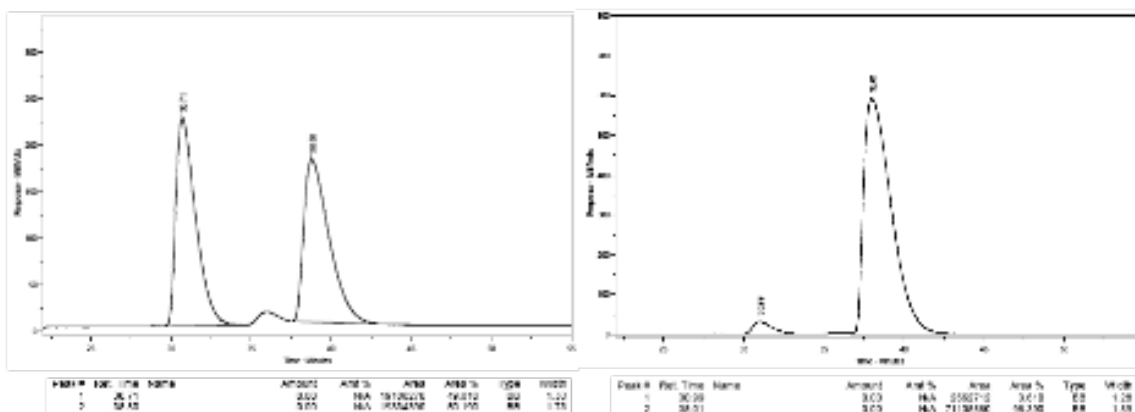

**Procedure for One-Pot Aminophenol-Catalyzed Enantioselective Allene Group Addition/Desilylation of *N*-TBS-protected-Isatin 14a on Gram Scale (Figure 5c):** On a bench-top, an oven-dried vial equipped with a stir bar is charged with aminophenol **2g** (6.1 mg, 20. μmol) and NaO*t*-Bu (3.1 mg, 32 μmol). The vial is sealed with a septum and Teflon tape and purged with N<sub>2</sub>. Anhydrous toluene (2.0 mL) is added and the mixture is



allowed to stir for 10 min under N<sub>2</sub> at 22 °C. A separate flame-dried 50 mL round bottom flask equipped with a stir bar is charged with isatin **14a** (1.045 g, 4.000 mmol). The flask is sealed with a septum and Teflon tape and purged with N<sub>2</sub>. Toluene (9.0 mL) and MeOH (325 μL, 8.00 mmol) are then transferred by syringe to the flask containing *N*-TBS-protected isatin **14a**. An appropriate portion of the stock solution of catalyst (1.00 mL) is transferred to the flask. Allenylboron reagent **19** (750. μL, 4.17 mmol) is added by syringe and the mixture is allowed to stir at 22 °C until the solution becomes colorless indicating complete consumption of intensely orange **14a** (2.0 minutes). The mixture is concentrated and the unpurified residue is re-dissolved in MeOH (20.0 mL) and treated with an aqueous 1.0 M solution of HCl (5.0 mL). The solution is allowed to stir at 22 °C until TLC analysis indicated complete consumption of the silylamide (typically 2.0 h). The solution is diluted with EtOAc (20 mL) and H<sub>2</sub>O (20 mL) and the organic layer is separated. The aqueous layer is further washed with EtOAc (3 x 20 mL), the organic layers are combined and dried over Na<sub>2</sub>SO<sub>4</sub>. The volatiles are removed yielding white solid which is recrystallized from EtOAc/hexanes (2 crops) to yield 675.8 mg of hydroxyindole **21** (3.61 mmol, 90% yield) as a white crystalline solid in >99:1 er.

**(R)-3-Hydroxy-3-(propa-1,2-dien-1-yl)indolin-2-one (21, Figure 5c)**: white crystalline solid, M.p. = 189–190 °C. IR (neat): 3316 (s, br), 1955 (w), 1691 (s), 1619 (m), 1469 (m), 1377 (m), 1355 (m), 1181 (m), 1103 (m), 1068 (m), 928 (m), 852 (m), 782 (m), 731 (m), 642 (s), 559 (m), 497 (m) cm<sup>-1</sup>; <sup>1</sup>H NMR (400 MHz, CD<sub>3</sub>OD): δ 7.33–7.31 (1H, m), 7.26–7.22 (1H, m), 7.05–7.01 (1H, m), 6.88–6.86 (1H, m), 5.51 (1H, t, *J* = 6.4 Hz), 4.90–4.75 (2H, m); <sup>13</sup>C NMR (100 MHz, CD<sub>3</sub>OD): δ 209.5, 180.6, 142.5, 132.3, 130.8, 126.3, 123.7, 111.3, 93.5, 78.9, 76.3; HRMS Calcd for C<sub>11</sub>H<sub>10</sub>NO<sub>2</sub> [M + H]<sup>+</sup>: 188.07115; Found: 188.07196. [α]<sub>D</sub><sup>20</sup> = –35.2 (*c* = 1.00, MeOH) for a >99:1 er sample. The enantiomeric purity of this compound was determined by HPLC analysis in comparison with authentic racemic material (Chiracel OD, 90:10 hexanes:*i*-PrOH, 0.6 mL/min, 220 nm): *t*<sub>R</sub> of **21**: 21 min (minor) and 24 min (major).

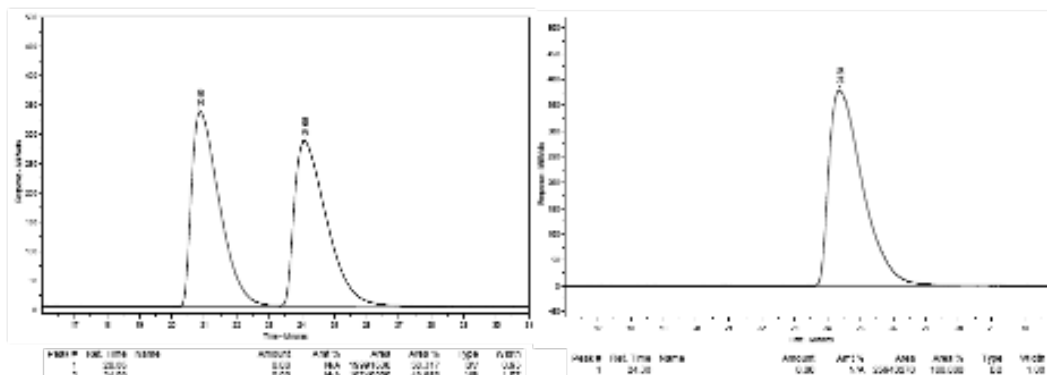

If the TBS-protected hydroxyindole is desired instead, the unpurified residue, obtained as a pale yellow oil after the allene addition protocol, can be purified by silica gel chromatography directly (a gradient from 100% CH<sub>2</sub>Cl<sub>2</sub> to 1:4 Et<sub>2</sub>O:CH<sub>2</sub>Cl<sub>2</sub> to 100 % Et<sub>2</sub>O) to obtain a 92% to >98% yield of **(R)-1-(tert-Butyldimethylsilyl)-3-hydroxy-3-(propa-1,2-dien-1-yl)indolin-2-one (S19, not shown in manuscript, see Chart S1)**: pale yellow oil. IR (neat): 3398 (m, br), 2929 (w), 2858 (w), 1955 (w), 1703 (s), 1613 (m), 1464 (m), 1256 (m), 1172 (m), 1101 (m), 939 (m), 829 (s), 746 (m) cm<sup>-1</sup>; <sup>1</sup>H NMR (400 MHz, CDCl<sub>3</sub>): δ 7.38–7.36 (1H, m), 7.23–7.19 (1H, ddd, *J* = 7.6, 7.6, 1.6 Hz), 7.07–7.00 (2H, m), 5.44 (1H, t, *J* = 6.4 Hz), 4.96 (2H, d, *J* = 6.4 Hz), 3.13 (1H, br s), 1.00 (9H, s), 0.54 (3H, s), 0.52 (3H, s); <sup>13</sup>C NMR (100 MHz, CDCl<sub>3</sub>): δ 207.6, 183.9, 145.6, 131.5, 129.6, 125.1, 122.7, 113.2, 93.7, 79.9, 74.9, 26.6, 19.8, -3.1, -3.2; HRMS Calcd for C<sub>17</sub>H<sub>24</sub>NO<sub>2</sub>Si [M + H]<sup>+</sup>: 302.15763; Found: 302.15757. [α]<sub>D</sub><sup>20</sup> = +25.9 (*c* = 1.00, CHCl<sub>3</sub>) for a 98:2 er sample. The enantiomeric purity of this compound was determined by HPLC analysis in comparison with authentic racemic material (Chiracel OD, 96:4 hexanes:*i*-PrOH, 0.6 mL/min, 220 nm): *t*<sub>R</sub> of 10 min (minor) and 13 min (major), *t*<sub>R</sub> of corresponding propargyl adduct: 12 and 18 min.

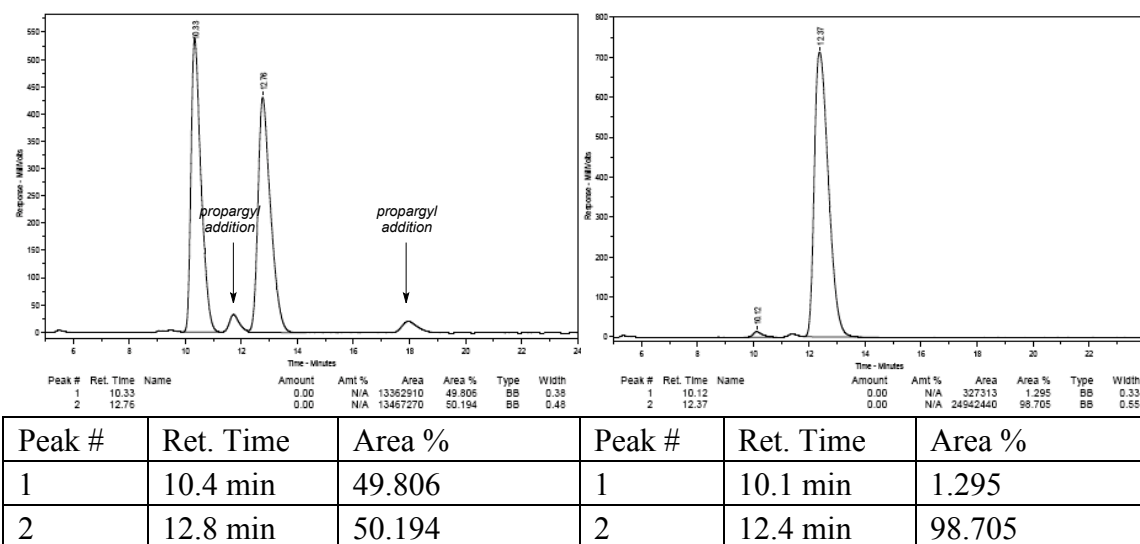

**Procedure for Two-step Conversion of Allenic Alcohol 21 to α-Hydroxy Alcohol 22 (Figure 5c):** A vial equipped with a stir bar is charged with allenyl carbinol **21** (37.4 mg, 0.200 mmol) to which is added enough MeOH to ensure complete dissolution of the solid (~2 mL). The solution is allowed to cool to -78 °C, before a flow of O<sub>3</sub> (10 mL/min) is bubbled through the solution until TLC analysis indicated complete consumption of the allene (typically between 1 and 5 minutes). Upon complete oxidative cleavage, the solution is purged with O<sub>2</sub> before the addition of NaBH<sub>4</sub> (76.0 mg, 2.00 mmol) at -78 °C. The solution is allowed to warm to 22 °C and stir for 20 min during the reduction. A drop of acetyl chloride is added and the mixture is concentrated *in vacuo*. The residue is redissolved in MeOH and a drop of acetyl chloride is added and re-concentrated. This procedure is repeated twice more to ensure protonation to the diol with concomitant

removal of B(OMe)<sub>3</sub>. The maroon solid is purified by silica gel chromatography (gradient from 1:1 EtOAc:Et<sub>2</sub>O to 100% EtOAc to 4:1 EtOAc:MeOH) to afford 31.8 mg of diol **22** (0.177 mmol, 89% yield) as a pale yellow solid.

**(S)-3-Hydroxy-3-(hydroxymethyl)indolin-2-one (22, Figure 5c)**: sticky pale yellow solid. IR (neat): 3248 (s, br), 1701 (s), 1620 (m), 1470 (m), 1334 (w), 1184 (m), 1118 (m), 1052 (s), 810 (m), 749 (m), 670 (m), 489 (m) cm<sup>-1</sup>; <sup>1</sup>H NMR (400 MHz, CD<sub>3</sub>OD): δ 7.39 (1H, ddd, *J* = 7.6, 1.2, 0.8 Hz), 7.25 (1H, ddd, *J* = 7.6, 7.6, 1.2 Hz), 7.25 (1H, ddd, *J* = 7.6, 7.6, 1.2 Hz), 6.90–6.87 (1H, m), 3.83 and 3.80 (2H, ABq, *J*<sub>AB</sub> = 10.8 Hz), 3.35 (1H, s); <sup>13</sup>C NMR (100 MHz, CD<sub>3</sub>OD): δ 181.5, 143.7, 131.7, 130.7, 125.8, 123.7, 111.2, 78.1, 66.9; HRMS Calcd for C<sub>9</sub>H<sub>10</sub>NO<sub>3</sub> [M + H]<sup>+</sup>: 180.06607; Found: 180.06614. [α]<sub>D</sub><sup>20</sup> = +43.9 (*c* = 1.00, MeOH) for a >99:1 er sample.

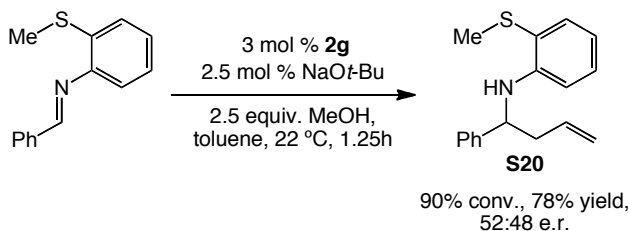

■ **Aminophenol-Catalyzed Enantioselective Allyl Additions to *o*-Thiomethylaniline-derived Aldimines:** **2-(methylthio)-*N*-(1-phenylbut-3-en-1-yl)aniline (S20)** is synthesized analogously to **4b** and purified by column chromatography (10 mm diameter column slurry packed with 2.5 g of silica gel in 95:5 hexanes:triethylamine and eluted with 50 mL hexanes and 20 mL 50:1 hexanes:diethyl ether) to afford 21 mg (0.078 mmol, 78% yield) of **S20** as a yellow oil. The analytical data are fully consistent with those reported previously.<sup>13</sup> The enantiomeric purity of this compound was determined by HPLC analysis in comparison with authentic racemic material (Chiracel OD, 98:2 hexanes:*i*-PrOH, 0.5 mL/min, 220 nm): *t*<sub>R</sub> of **S20**: 11 min (minor) and 13 min (major).

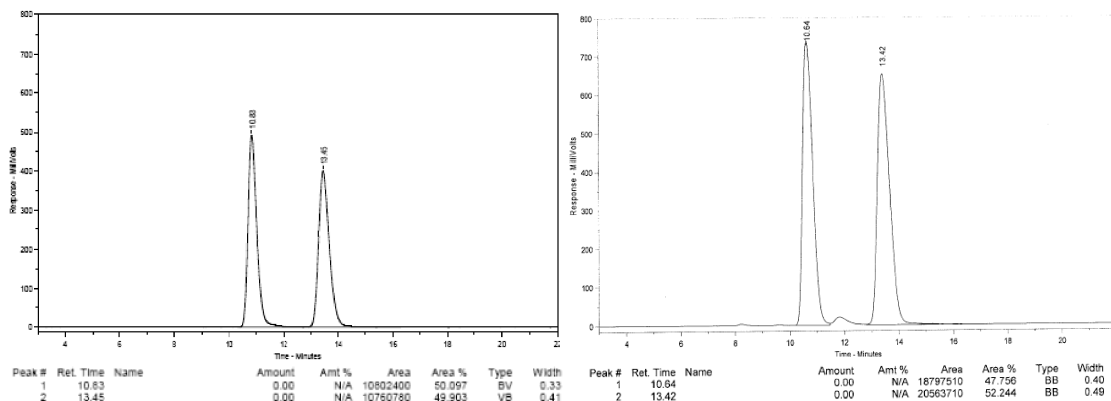

| Peak # | Ret. Time | Area % | Peak # | Ret. Time | Area % |
|--------|-----------|--------|--------|-----------|--------|
| 1      | 10.8 min  | 50.097 | 1      | 10.6 min  | 47.756 |
| 2      | 13.5 min  | 49.903 | 2      | 13.4 min  | 52.244 |

■ **Representative Example of Utilization of DBU as the Base Instead of NaOt-Bu for the Enantioselective Allyl Addition to Aldimine 3a:** The reaction is performed following the representative procedure for *small scale* catalytic enantioselective allyl additions to aryl-, heteroaryl-, alkenyl-, and alkynyl *N*-diphenylphosphinoyl imines except for the following changes: 1) 2.5 mol % DBU is used (instead of 2.5 mol % NaOt-Bu) 2) Reaction time is 75 min. The conversion to desired product is 83% (judged by 400 MHz <sup>1</sup>H NMR spectra of unpurified reaction mixture vs. an internal standard of 9-methylanthracene) which is lower than the >98% conversion obtained when using the same amount of NaOt-Bu. The enantiomeric purity was determined by HPLC analysis in comparison with authentic racemic material (Chiracel OD, 92:8 hexanes:*i*-PrOH, 0.5 mL/min, 220 nm): *t*<sub>R</sub> of **4a**: 15 min (major) and 21 min (minor).

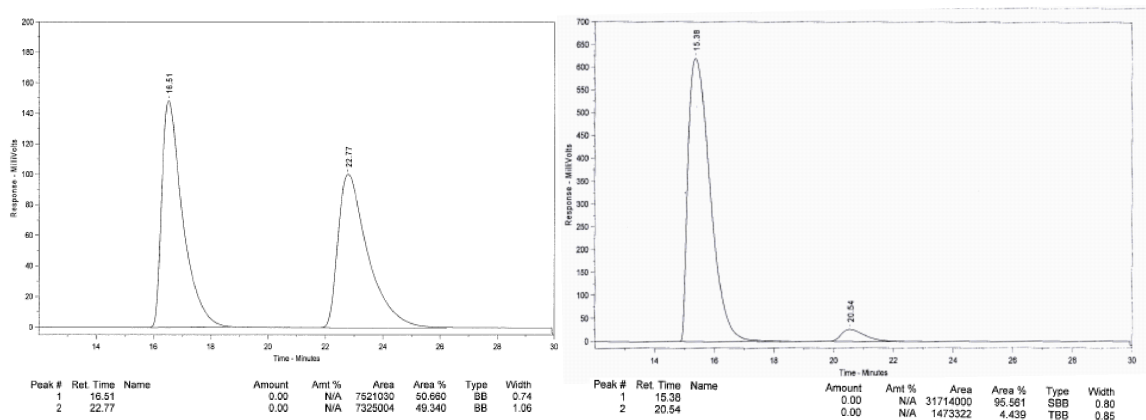

| Peak # | Ret. Time | Area % | Peak # | Ret. Time | Area % |
|--------|-----------|--------|--------|-----------|--------|
| 1      | 16.5 min  | 50.660 | 1      | 15.4 min  | 95.561 |
| 2      | 22.8 min  | 49.340 | 2      | 20.5 min  | 4.439  |

## ■■ PROOF of ABSOLUTE STEREOCHEMISTRY of PRODUCTS

**Absolute configuration of homoallylamide S7:** Please see Part D of the Supplementary Information for X-ray crystallographic data.

**Absolute configuration of homoallylamide S12:** Please see Part D of the Supplementary Information for X-ray crystallographic data. For the catalytic enantioselective allyl additions to aldimines, it should be noted that the absolute stereochemical identities of the major product enantiomers are inferred from the obtained X-ray crystal structures of homoallylic amides **S7** and **S12**.

**Absolute configuration of homoallylamide 10:** Please see Part D of the Supplementary Information for X-ray crystallographic data. The absolute stereochemistry of the obtained crystal was further verified by HPLC analysis in comparison with authentic racemic material

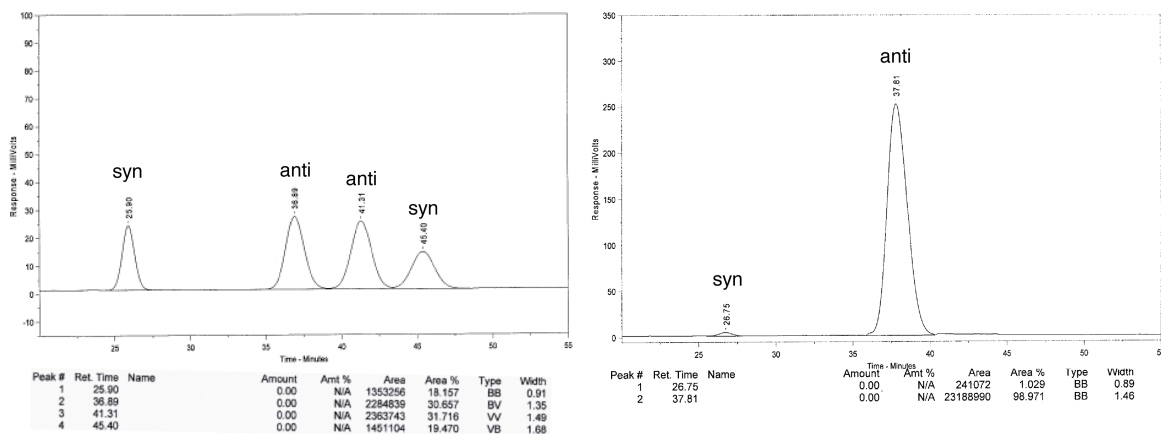

| Peak #   | Ret. Time | Area % | Peak #   | Ret. Time | Area % |
|----------|-----------|--------|----------|-----------|--------|
| 1 (syn)  | 25.9      | 18.157 | 1 (syn)  | 26.8      | 1.029  |
| 2 (anti) | 36.9      | 30.657 | 2 (anti) | 37.8      | 98.971 |
| 3 (anti) | 41.3      | 31.716 | 3 (anti) | -         | -      |
| 4 (syn)  | 45.4      | 19.470 | 4 (syn)  | -         | -      |

**Absolute configuration of homoallylamide 11:** Please see Part D of the Supplementary Information for X-ray crystallographic data. The absolute stereochemistry of the obtained crystal was further verified by HPLC analysis in comparison with authentic racemic material.

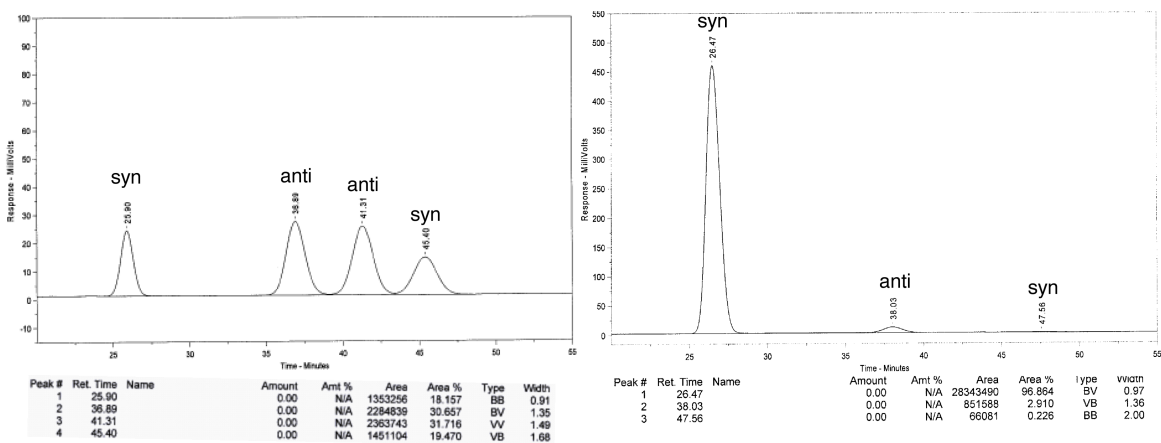

| Peak #   | Ret. Time | Area % | Peak #   | Ret. Time | Area % |
|----------|-----------|--------|----------|-----------|--------|
| 1 (syn)  | 25.9      | 18.157 | 1 (syn)  | 26.5      | 96.864 |
| 2 (anti) | 36.9      | 30.657 | 2 (anti) | 38.0      | 2.910  |
| 3 (anti) | 41.3      | 31.716 | 3 (anti) | -         | -      |
| 4 (syn)  | 45.4      | 19.470 | 4 (syn)  | 47.6      | 0.226  |

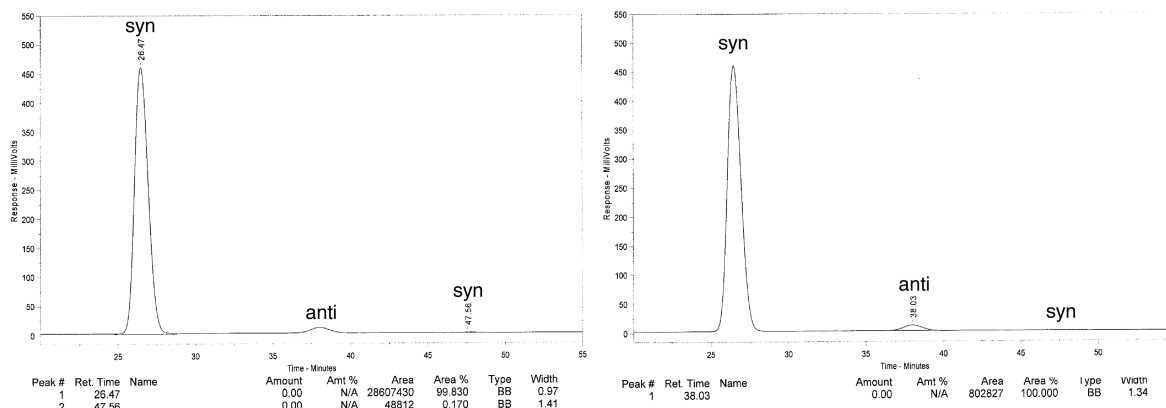

| Peak #  | Ret. Time | Area % | Peak #   | Ret. Time | Area %  |
|---------|-----------|--------|----------|-----------|---------|
| 1 (syn) | 26.5      | 99.830 | 1 (anti) | 38.0      | 100.000 |
| 2 (syn) | 41.7      | 0.170  | 2 (anti) | -         | -       |

**Absolute configuration of homoallylamide 13:** Please see Part D of the Supplementary Information for X-ray crystallographic data. The absolute stereochemistry the obtained crystal was further verified by HPLC analysis in comparison with authentic racemic material.

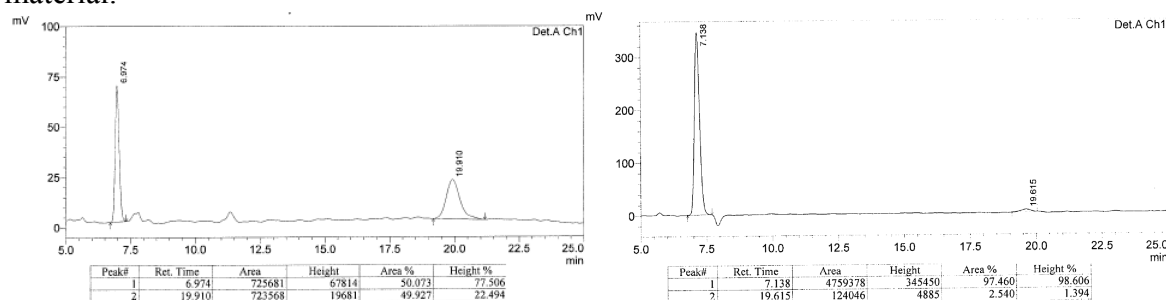

| Peak # | Ret. Time | Area % | Peak # | Ret. Time | Area % |
|--------|-----------|--------|--------|-----------|--------|
| 1      | 7.0       | 50.073 | 1      | 7.1       | 97.460 |
| 2      | 19.9      | 49.927 | 2      | 19.6      | 2.540  |

**Absolute configuration of homoallylic alcohol 15a:** For the aminophenol catalyzed enantioselective allyl additions to isatin, please note that the absolute stereochemistries of the major product enantiomers are inferred from the obtained X-ray crystal structure (see Part D of the Supplementary Information) of homoallylic alcohol **15a**. The absolute stereochemistry of the obtained crystal was also verified by HPLC analysis in comparison with authentic racemic material (Chiracel OD-H, 90:10 hexanes:*i*-PrOH, 0.8 mL/min, 220 nm):  $t_R$  of **15a**: 12 min (minor) and 16 min (major).

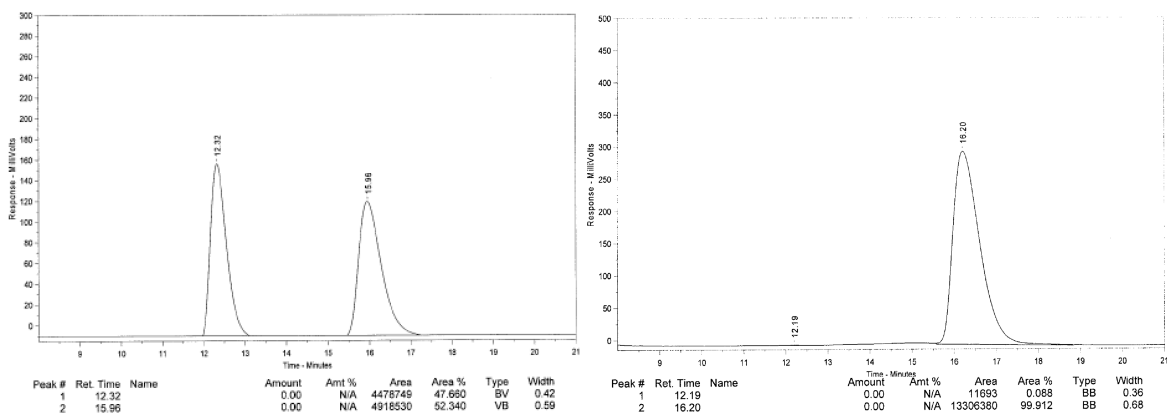

| Peak # | Ret. Time | Area % | Peak # | Ret. Time | Area % |
|--------|-----------|--------|--------|-----------|--------|
| 1      | 12.3      | 47.660 | 1      | 12.2      | 0.088  |
| 2      | 16.0      | 52.340 | 2      | 16.2      | 99.912 |

**Absolute configuration of allenyl alcohol **21**:** For the catalytic enantioselective allene additions to isatin, please note that the absolute stereochemistries of the major product enantiomers are inferred from the obtained X-ray crystal structure (see Part D of the Supplementary Information) of allenyl alcohol **21**. The absolute stereochemistry of the obtained crystal was further verified by HPLC analysis in comparison with authentic racemic material (Chiracel OD, 90:10 hexanes:*i*-PrOH, 0.6 mL/min, 220 nm):  $t_R$  of **21**: 21 min (minor) and 24 min (major).

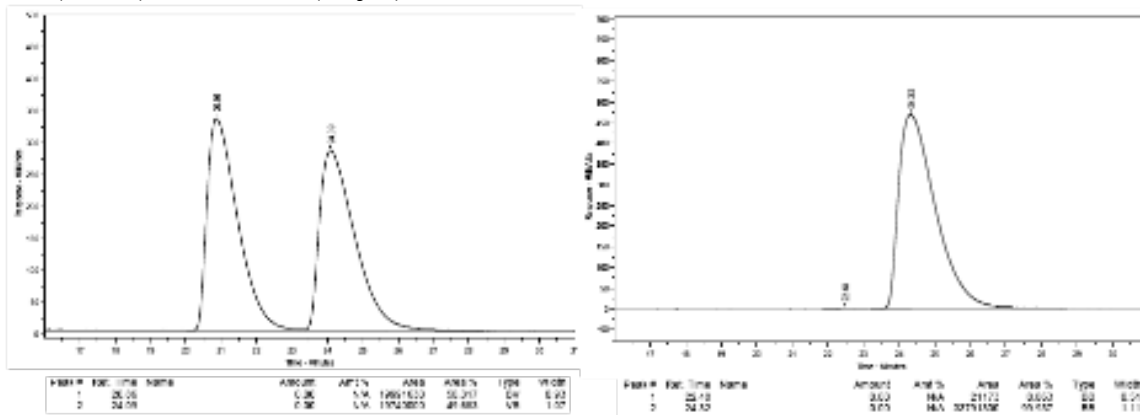

| Peak # | Ret. Time | Area % |
|--------|-----------|--------|
| 1      | 20.9 min  | 50.317 |
| 2      | 24.1 min  | 49.683 |

| Peak # | Ret. Time | Area % |
|--------|-----------|--------|
| 1      | 22.5 min  | 0.063  |
| 2      | 24.3 min  | 99.937 |

# Simple Organic Molecules as Catalysts for Enantioselective Synthesis of Amines and Alcohols

Daniel L. Silverio, Sebastian Torker, Tatiana Pilyugina, Erika M. Vieira,  
Marc L. Snapper, Fredrik Haeffner & Amir H. Hoveyda\*

*Department of Chemistry, Merkert Chemistry Center, Boston College, Chestnut Hill, Massachusetts 02467*

## SUPPLEMENTARY INFORMATION; PART B

| <i>Table of Contents</i>                                                                                                                    | <i>Page</i> |
|---------------------------------------------------------------------------------------------------------------------------------------------|-------------|
| <i>Investigation of the Effect of Allylboronate 1a and MeOH on the Phenoxide of Aminophenol 2g</i>                                          | S61         |
| <i>Generation of a Hammett Plot for the Aminophenol Catalyzed Enantioselective Allyl Addition to a series of Aryl-Substituted Aldimines</i> | S64         |
| <i>DFT Calculations</i>                                                                                                                     | S68         |



## ■ Investigation of the Level of Brønsted Acidity of the Complex Derived from Allylboron Reagent (**1a**) and MeOH

**General Information Specific to the Following Study (for further information; see Part A of the Supplementary Information).** All vials, stir bars, and NMR tubes were oven-dried (135 °C) overnight prior to use. The <sup>1</sup>H NMR spectra were recorded on a Varian Unity INOVA 400 (400 MHz) spectrometer. Chemical shifts are reported in ppm from tetramethylsilane with the solvent resonance as the internal standard (*d*<sub>8</sub>-toluene: δ 7.09 ppm).

*Preparation of samples for NMR spectroscopy:* In a nitrogen-filled glovebox, aminophenol **2g** (7.7 mg, 25 μmol) is weighed into a one-dram vial and dissolved in 700. μL of *d*<sub>8</sub>-toluene. The solution is transferred to an NMR tube and sealed with a cap and Teflon tape; it is then used to obtain **Spectrum 1**.

A separate one-dram vial equipped with a stir bar is charged with **2g** (30.8 mg, 0.101 mmol) and 2.8 mL of a stock solution of NaOt-Bu in *d*<sub>8</sub>-toluene (9.6 mg, 0.10 mmol NaOt-Bu/2.8 mL *d*<sub>8</sub>-toluene) to afford a translucent solution. A 700. μL aliquot of this solution (containing NaOt-Bu [2.4 mg, 25 μmol] and aminophenol [7.7 mg, 25 μmol]) is added to an NMR tube and sealed with a cap and Teflon tape; it is then used to obtain **Spectrum 2**.

A second 700. μL aliquot is transferred to a one-dram vial containing allylboronic acid pinacol ester (10. μL, 53 μmol) **1a** and this mixture is then used to obtain **Spectrum 3**.

Methanol (10. μL, 250 μmol) is added to the remaining 1.4 mL of NaOt-Bu and **2g** mixture and a 700. μL aliquot (containing NaOt-Bu [2.4 mg, 25 μmol], aminophenol **2g** [7.7 mg, 25 μmol], and methanol [5.0 μL, 130 μmol]) of the resultant solution is added to an NMR tube and sealed with a cap and Teflon tape; it is then used to obtain **Spectrum 4**.

Allylboronic acid pinacol ester **1a** (10. μL, 53 μmol) is added to the remaining solution (containing NaOt-Bu [2.4 mg, 25 μmol], aminophenol **2g** [7.7 mg, 25 μmol], and methanol [5.0 μL, 130 μmol]), which results in formation of a white precipitate, causing the toluene solution to become cloudy. The latter solution is added to an NMR tube and sealed with a cap and Teflon tape; it is then used to obtain **Spectrum 5**.

**Spectrum 1** ( $^1\text{H}$  NMR, 400 MHz,  $d_8$ -toluene): Aminophenol **2g**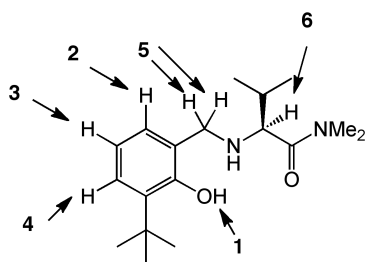

- |                                   |                                                              |
|-----------------------------------|--------------------------------------------------------------|
| 1: 11.11 ppm (1H, br s)           | 4: 6.65–6.63 ppm (1H, m)                                     |
| 2: 7.27–7.24 ppm (1H, m)          | <b>5a, 5b</b> : 3.79, 3.26 ppm (2H, ABq, $J_{AB} = 13.5$ Hz) |
| 3: 6.72 ppm (1H, t, $J = 7.6$ Hz) | 6: 3.02–2.98 ppm (1H, br m)                                  |

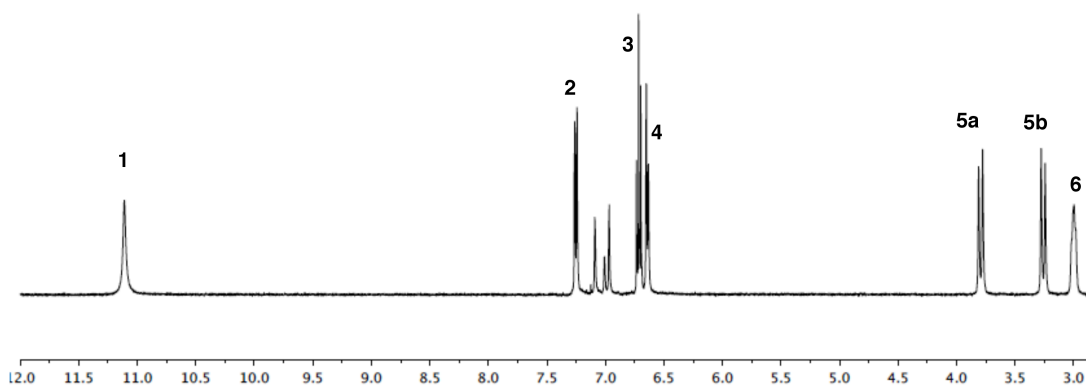**Spectrum 2** ( $^1\text{H}$  NMR, 400 MHz,  $d_8$ -toluene): Aminophenol **2g** (25  $\mu\text{mol}$ , 1 equiv.) and NaOt-Bu (25  $\mu\text{mol}$ , 1 equiv.)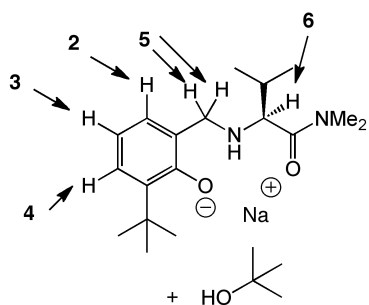

- |                                   |                                   |
|-----------------------------------|-----------------------------------|
| 2: 7.35–7.33 ppm (1H, m)          | <b>5a</b> : 4.09 ppm (1H, br s)   |
| 3: 6.43 ppm (1H, t, $J = 7.3$ Hz) | <b>5b</b> : 3.63 ppm (1H, br s)   |
| 4: 6.98–6.96 ppm (1H, m)          | 6: 3.11 ppm (1H, d, $J = 6.4$ Hz) |

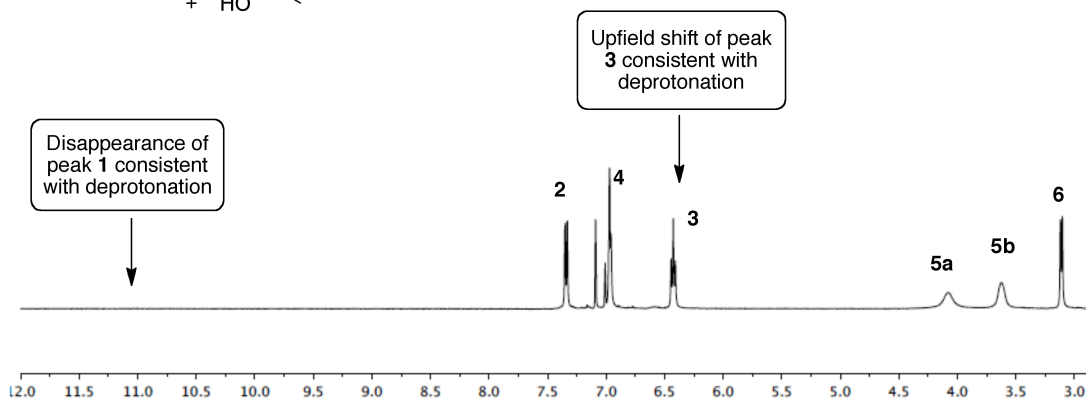

**Spectrum 3** ( $^1\text{H}$  NMR, 400 MHz,  $d_8$ -toluene): Aminophenol **2g** (25  $\mu\text{mol}$ , 1 equiv.),  $\text{NaOt-Bu}$  (25  $\mu\text{mol}$ , 1 equiv.), and Allylboronate **1a** (53  $\mu\text{mol}$ , 2 equiv.)

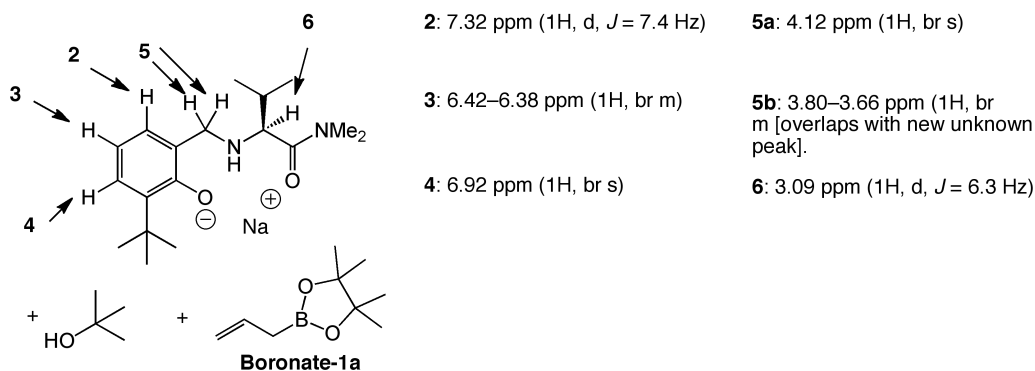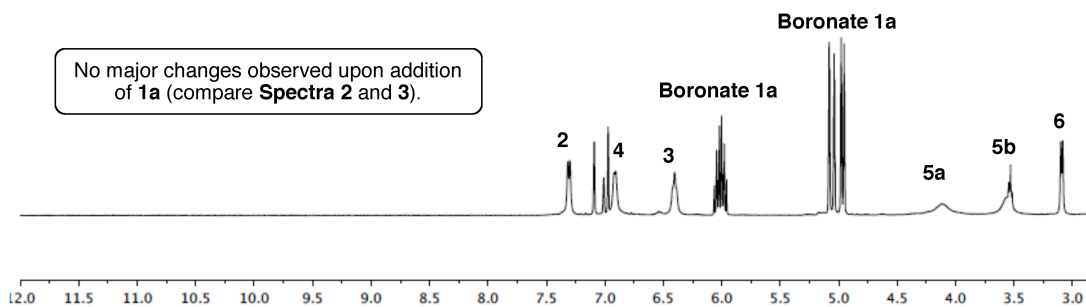

**Spectrum 4** ( $^1\text{H}$  NMR, 400 MHz,  $d_8$ -toluene): Aminophenol **2g** (25  $\mu\text{mol}$ , 1 equiv.),  $\text{NaOt-Bu}$  (25  $\mu\text{mol}$ , 1 equiv.), and MeOH (130  $\mu\text{mol}$ , 5 equiv.)

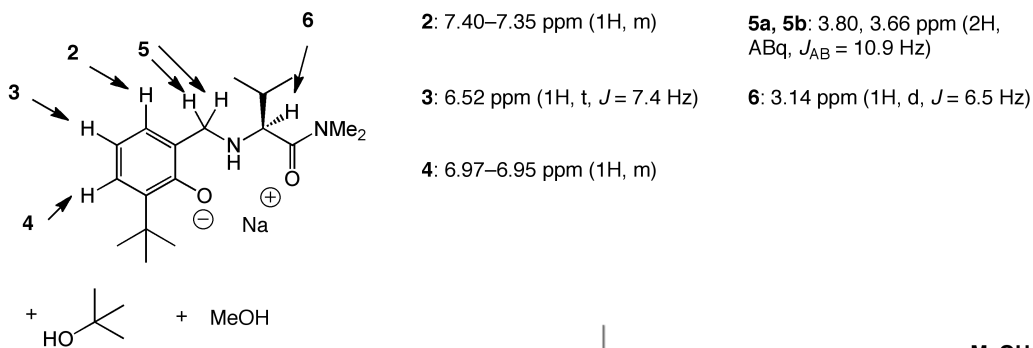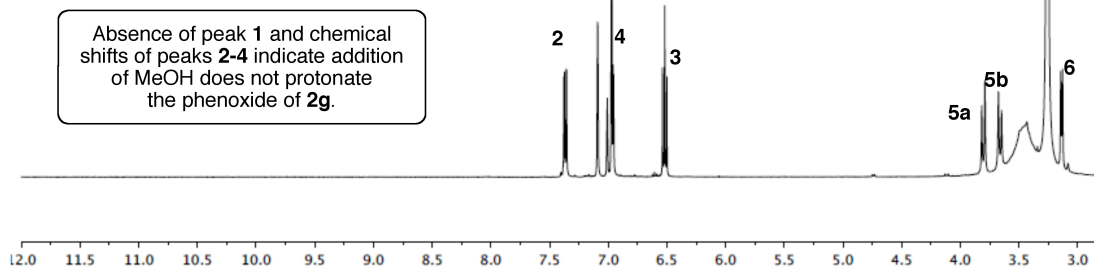

**Spectrum 5** ( $^1\text{H}$  NMR, 400 MHz,  $d_8$ -toluene): Aminophenol **2g** (25  $\mu\text{mol}$ , 1 equiv.), NaOt-Bu (25  $\mu\text{mol}$ , 1 equiv.), Allylboronate **1a** (53  $\mu\text{mol}$ , 2 equiv.), and MeOH (130  $\mu\text{mol}$ , 5 equiv.)

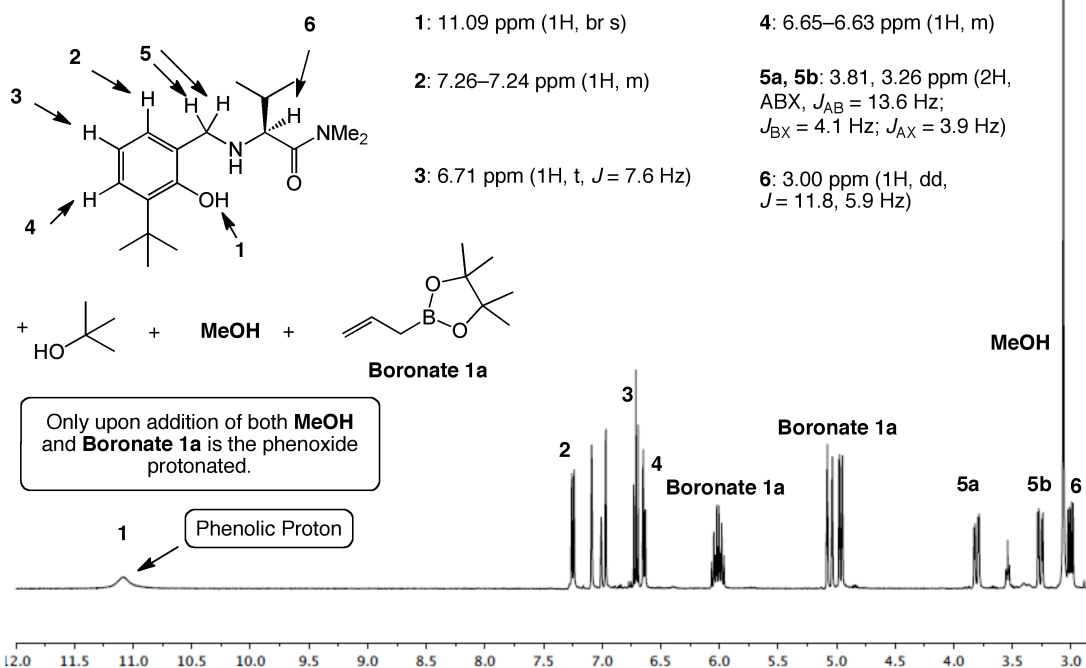

## ■ Generation of a Hammett Plot for the Aminophenol Catalyzed Enantioselective Allyl Addition to a Series of Aryl-Substituted Aldimines

The electronic effect of the aryl substituent on the reaction rate of the aminophenol catalyzed enantioselective allyl addition to aryl-substituted aldimines was determined by React-IR measurements of conversion of imine [%] as a function of time [min] (Scheme S1).

### Scheme S1: Reaction Conditions for the Enantioselective Allylation of Imines Applied in React-IR Measurements to Generate the Hammett Plot

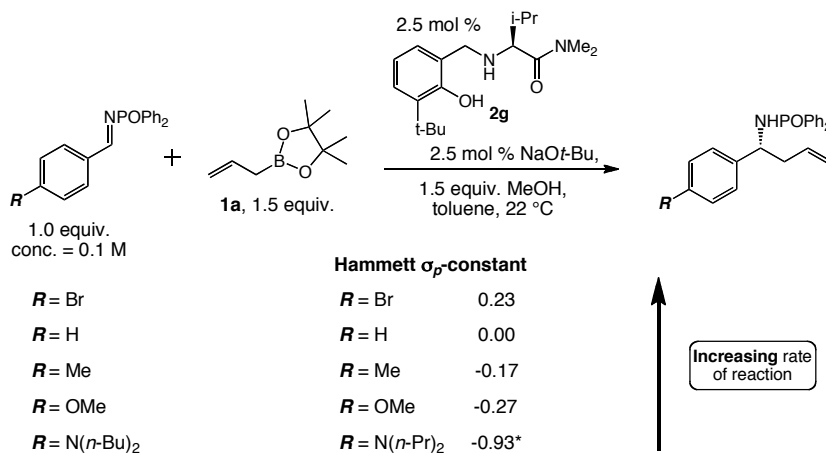

\*The  $\sigma_p$ -constant for  $-\text{N}(n\text{-Pr})_2$  has been used for  $-\text{N}(n\text{-Bu})_2$ .

**General Procedure (for further information; see Part A of the Supplementary Information):** The preparation of stock solutions of reagents (allylboronate **1a**, MeOH, aminophenol **2g**, and NaO*t*-Bu) and weighing of imines were performed in a nitrogen-filled glovebox. All vials and stir bars were oven-dried (135 °C) overnight prior to use. Rubber septa and caps were oven-dried (60 °C) overnight prior to use. An 8 mL vial equipped with a stir bar is charged with the desired aldimine (0.200 mmol) and the vial is sealed with a cap. To prepare the stock solution of allylboronate **1a**, a 4 mL vial is charged with **1a** (0.450 mL, 2.40 mmol) and toluene (3.55 mL) and sealed with a cap containing a teflon septum. To prepare the stock solution of MeOH, a 4 mL vial is charged with MeOH (0.120 mL, 3.00 mmol) and toluene (3.88 mL) and sealed with a cap containing a teflon septum. To prepare the stock solution of aminophenol **2g**, 4 mL vial is charged with aminophenol **2g** (15.3 mg, 0.0499 mmol) and toluene (4.00 mL) and sealed with a cap containing a Teflon septum. To prepare the stock solution of NaO*t*-Bu, a 4 mL vial is charged with NaO*t*-Bu (19.2 mg, 0.200 mmol) and toluene (4.00 mL). The NaO*t*-Bu solution is diluted further by charging a 4 mL vial with toluene (3.00 mL) and 1.00 mL of the original stock solution. The vial was sealed with a cap containing a teflon septum. The prepared solutions and vials containing the imines were taken out of the glovebox and stored in a desiccator for the duration of React-IR measurements.

**React-IR measurements:** Measurements were performed on a ReactIR iC10 instrument equipped with a 6.3 mm AgX DiComp Fiber probe. Spectra were recorded from 2000  $\text{cm}^{-1}$  to 650  $\text{cm}^{-1}$  at standard resolution (8  $\text{cm}^{-1}$ ) in 15 s intervals. The vial containing imine is equipped with a 14/20 rubber septum with a 4 mm diameter hole and attached to the probe, which had been dried with a heat gun ( $T_{\text{max}} = 200$  °C). The rubber septum is further sealed with electrical tape. Toluene (0.3 mL) is added with a syringe, followed by the addition of the stock solutions of allylboronate **1a** (0.50 mL) and MeOH (0.40 mL). After 3 min, the reaction is started by the simultaneous addition of the solutions of aminophenol **2g** (0.4 mL) and NaO*t*-Bu (0.4 mL).

**Data processing:** The decrease in concentration of imine was monitored as a function of time [min] (Figures 1a and 1b). The following IR absorption frequencies characteristic of the imines in this study were used: 834–822  $\text{cm}^{-1}$  for R = Br, 836–824  $\text{cm}^{-1}$  for R = H, 842–830  $\text{cm}^{-1}$  for R = Me, 835–823  $\text{cm}^{-1}$  for R = OMe, and 1592–1580  $\text{cm}^{-1}$  for R = N(*n*-Bu)<sub>2</sub>. The intensities were calibrated as following: the difference between the intensities at the start of the reaction and the intensities at the end of the reaction (i.e. when no further change was observed in the concentration of imine) was set to the conversion [%] determined by 400 MHz <sup>1</sup>H NMR (100% except for 95% in the case of R = N(*n*-Bu)<sub>2</sub>).

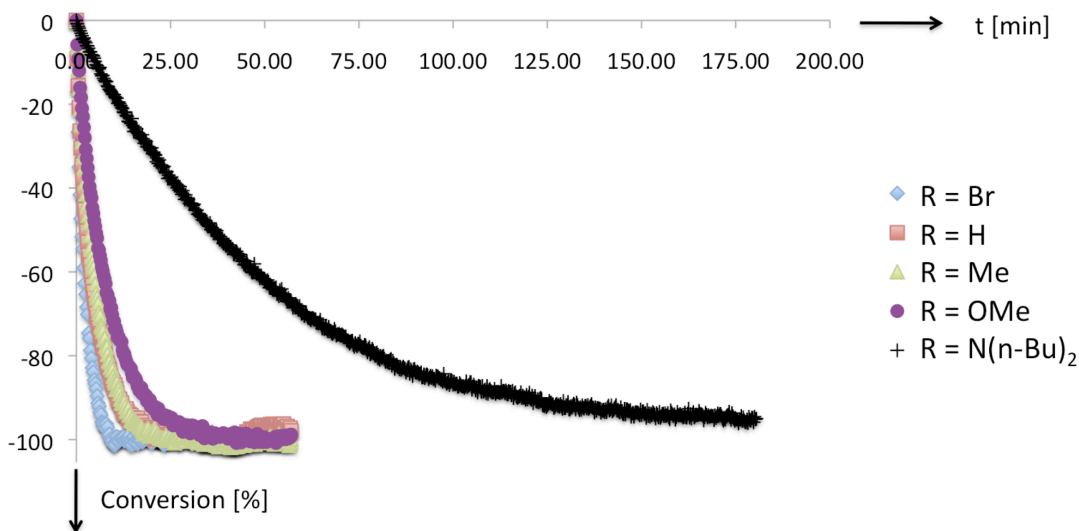

**Figure S1a: Conversion of Imine [%] vs Time [min]**

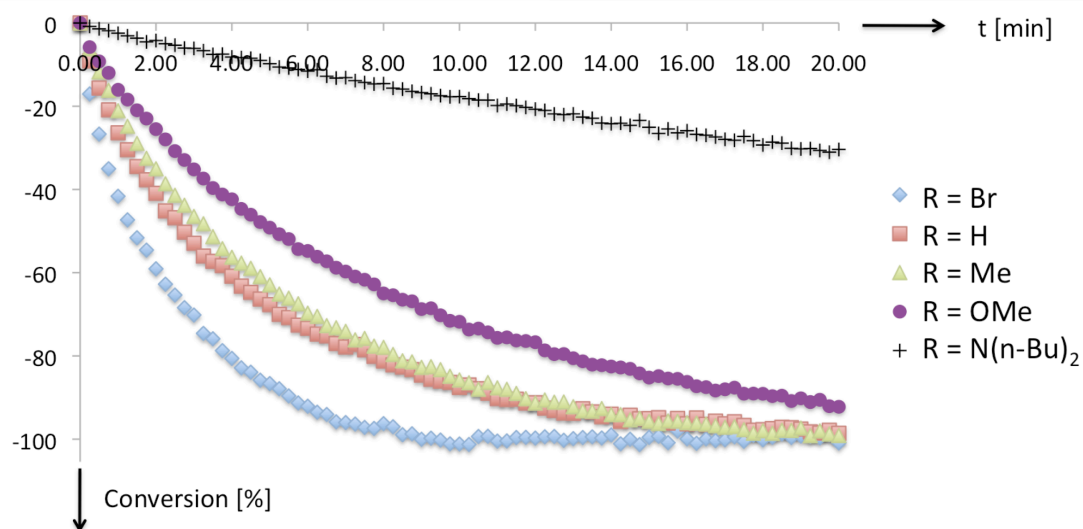

**Figure S1b: Conversion of Imine [%] vs Time [min] (Zoomed in Region).**

The curves in Figures S1a and S1b were fitted with a 6<sup>th</sup>-order polynomial function through the use of Microsoft Excel (Figure S1c). In order to obtain a reasonable fit, the curves were truncated after a maximum time (8 min for R = Br, 20 min for R = H, 20 min for R = Me, 40 min for R = OMe, and 180 min for R = N(*n*-Bu)<sub>2</sub>). The relative rates  $k_X$  (for time  $\rightarrow 0$  min) can be read directly from the equations of the polynomials (values in red), which are used for the generation of the Hammett plot in Graph S1 (plot of  $\log(k_X/k_H)$  vs  $\sigma_p$ -constant). Linear regression results in a  $\rho$ -value of 1.3 (slope), indicating a faster reaction with more electron deficient aryl substituted aldimines.

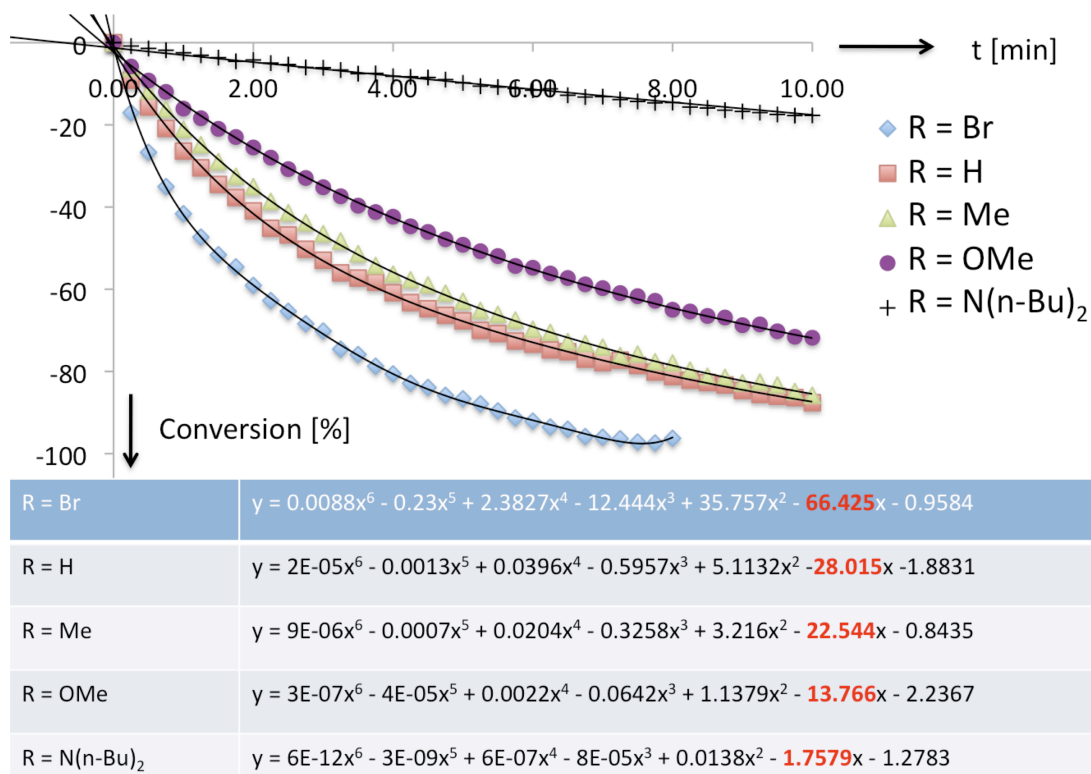

**Figure S1c: Plot of Conversion of Imine [%] vs Time [min] Including 6<sup>th</sup>-Order Polynomial Fits**

**Please Note:** The relative rates at  $t = 0$  can be read directly from the polynomial functions (values in red).

**Graph S1: Hammett Plot [ $\log(k_X/k_H)$  vs  $\sigma_p$ -constant] Indicating the Electronic Substituent Dependence for the Enantioselective Allylation Under the Conditions Shown in Scheme S1.**

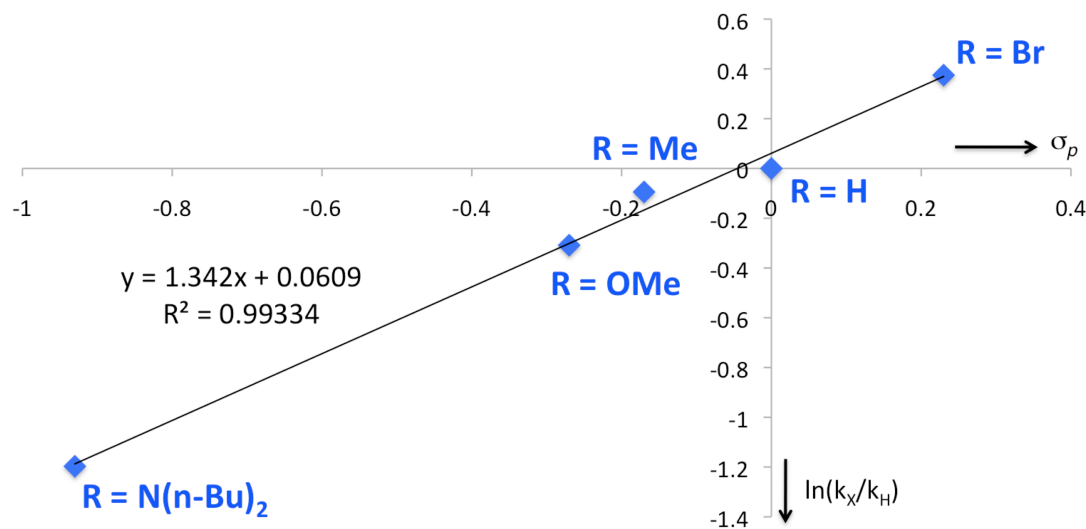

■ **DFT Calculations:** All geometry and frequency calculations of the transition states shown in Scheme S2 were carried out employing the hybrid functional B3LYP<sup>1</sup> and the split-valence 6-31G\*\* basis set. The calculations were carried out in toluene, which was simulated by the polarizable dielectric continuum solvation model PCM.<sup>2</sup> Frequency calculations were carried out on the fully optimized geometries. All computed frequencies are real except for the transition state structures, which have one imaginary frequency. Free energies were computed at 298.15 K and 1.0 atm. with harmonic, unscaled frequencies. All quantum chemical calculations were carried out with the Gaussian 09 computer program.<sup>3</sup>

---

(1) (a) Becke, A. D. *J. Chem. Phys.* **1993**, *98*, 5648-5652; Lee, C.; Yang, W.; Parr, R. G. *Phys. Rev. B.* **1988**, *37*, 785–789. (b) Vosko, S. H.; Wilk, L.; Nusair, M. *Can. J. Phys.* **1980**, *58*, 1200–1211. (c) Stephens, P. J.; Devlin, F. J.; Chabalowski, C. F.; Frisch, M. J. *J. Phys. Chem.* **1994**, *98*, 11623–11627.

(2) Tomasi, J.; Mennucci, B.; Cammi, R. *Chem. Rev.* **2005**, *105*, 2999–3093.

(3) Gaussian 09, Revision A.02, M. J. Frisch, G. W. Trucks, H. B. Schlegel, G. E. Scuseria, M. A. Robb, J. R. Cheeseman, G. Scalmani, V. Barone, B. Mennucci, G. A. Petersson, H. Nakatsuji, M. Caricato, X. Li, H. P. Hratchian, A. F. Izmaylov, J. Bloino, G. Zheng, J. L. Sonnenberg, M. Hada, M. Ehara, K. Toyota, R. Fukuda, J. Hasegawa, M. Ishida, T. Nakajima, Y. Honda, O. Kitao, H. Nakai, T. Vreven, J. A. Montgomery, Jr., J. E. Peralta, F. Ogliaro, M. Bearpark, J. J. Heyd, E. Brothers, K. N. Kudin, V. N. Staroverov, R. Kobayashi, J. Normand, K. Raghavachari, A. Rendell, J. C. Burant, S. S. Iyengar, J. Tomasi, M. Cossi, N. Rega, J. M. Millam, M. Klene, J. E. Knox, J. B. Cross, V. Bakken, C. Adamo, J. Jaramillo, R. Gomperts, R. E. Stratmann, O. Yazyev, A. J. Austin, R. Cammi, C. Pomelli, J. W. Ochterski, R. L. Martin, K. Morokuma, V. G. Zakrzewski, G. A. Voth, P. Salvador, J. J. Dannenberg, S. Dapprich, A. D. Daniels, O. Farkas, J. B. Foresman, J. V. Ortiz, J. Cioslowski, and D. J. Fox, Gaussian, Inc., Wallingford CT, 2009.



Scheme S2a: Calculated Transition State Complex Which Leads to the *R* (Major) Enantiomer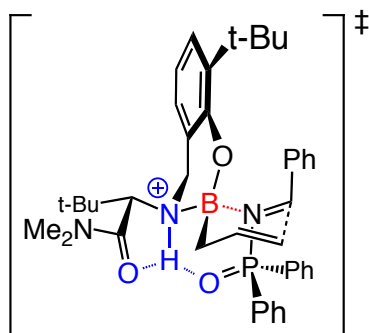

R-TS (Labeled I in Figure 2d)

0.0 kcal/mol

Scheme S2b: Calculated Transition State Complexes Which Lead to the *S* (Minor) Enantiomer and their Energies Relative to *R*-TS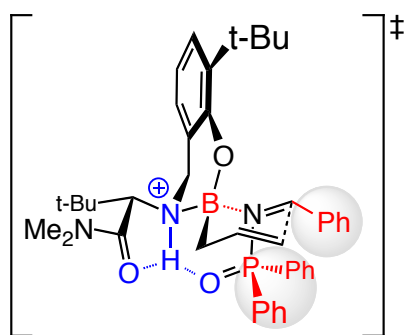*S*-TS1

+2.4 kcal/mol

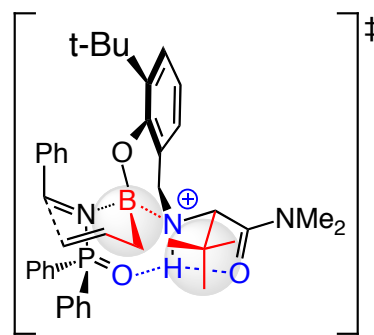*S*-TS2 (labeled III in Figure 2d)

+5.9 kcal/mol

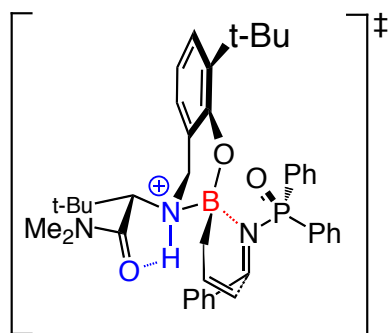*S*-TS3

+7.5 kcal/mol

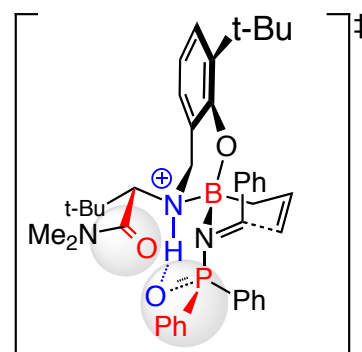*S*-TS4

+10.8 kcal/mol

**Please Note:** (a) The energy of complex *R*-TS is used as a zero point reference. (b) The aminophenol derived from *L*-*tert*-leucine **2h** (Table 1) was modeled instead of **2g** due to fewer possible conformers present in **2h**.

**Transition State Energy for Complex R-TS (Scheme S2a; Labeled I in Figure 2d of the Manuscript)**

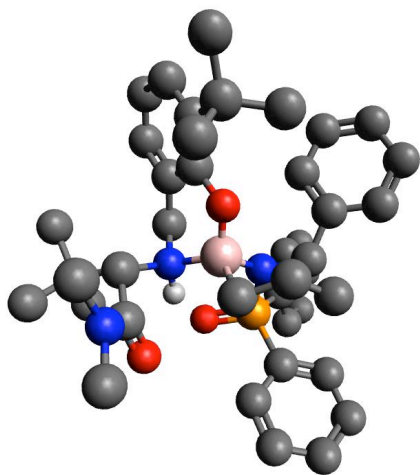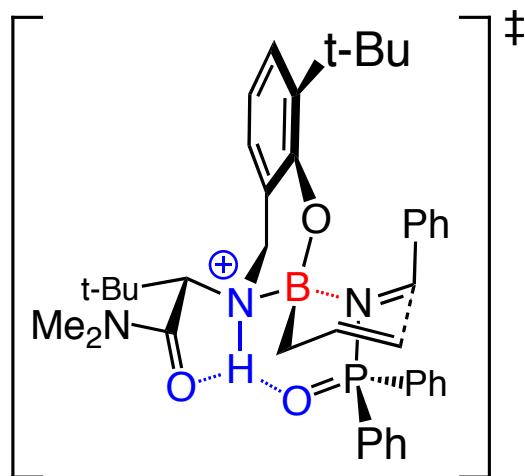

-----  
Cartesian coordinates (Angstroms):  
-----

H -1.997 5.662 -2.432  
H 2.845 3.498 -3.033  
C -1.530 4.983 -1.725  
H -2.465 3.254 -2.572  
H 5.208 3.571 -2.438  
H -0.497 6.545 -0.652  
H -1.613 1.457 -3.522  
C -1.786 3.619 -1.808  
C -0.689 5.479 -0.724  
C 2.573 3.276 -1.995  
H 2.401 4.227 -1.484  
H 4.283 1.440 -3.143  
C 4.982 3.358 -1.389  
H 1.634 2.723 -1.994  
H 4.852 4.319 -0.882  
H 0.707 0.874 -3.068  
C -1.391 0.596 -2.902  
H -5.918 -1.106 -2.868  
C 3.713 2.484 -1.315  
C 4.005 1.190 -2.114  
C -0.079 0.199 -2.737  
H 5.856 2.856 -0.960  
C -1.189 2.716 -0.908  
H -2.184 -0.140 -2.815  
C -0.116 4.598 0.192  
H -5.159 -3.355 -3.599  
H 3.135 0.532 -2.147  
C -5.062 -1.574 -2.391  
H 4.839 0.639 -1.667  
C -4.636 -2.840 -2.799  
C -1.614 1.287 -0.936  
C -0.361 3.228 0.101

|   |        |        |        |
|---|--------|--------|--------|
| H | 0.524  | 4.972  | 0.985  |
| H | -4.759 | 0.058  | -1.029 |
| H | -2.692 | 1.219  | -1.082 |
| C | -4.398 | -0.911 | -1.359 |
| C | 3.350  | 2.117  | 0.142  |
| C | 0.298  | -0.915 | -1.906 |
| H | -2.085 | 2.015  | 1.781  |
| H | 4.935  | 3.270  | 1.022  |
| O | 1.420  | 0.816  | -0.501 |
| H | 1.301  | -1.278 | -2.131 |
| C | -3.548 | -3.449 | -2.171 |
| H | -0.423 | -1.730 | -1.893 |
| H | -3.599 | 3.312  | 3.221  |
| C | 4.114  | 2.594  | 1.219  |
| H | 0.076  | 2.562  | 0.832  |
| H | -3.226 | -4.439 | -2.477 |
| C | 2.276  | 1.256  | 0.479  |
| N | -1.101 | 0.313  | -0.104 |
| C | -3.293 | -1.514 | -0.733 |
| B | 0.412  | -0.198 | -0.346 |
| C | -3.060 | 1.611  | 2.023  |
| C | -2.876 | -2.795 | -1.139 |
| C | -3.918 | 2.348  | 2.839  |
| P | -2.343 | -0.731 | 0.604  |
| H | -2.035 | -3.269 | -0.642 |
| C | 3.872  | 2.228  | 2.544  |
| C | -3.464 | 0.367  | 1.515  |
| C | 2.067  | 0.822  | 1.796  |
| H | 2.858  | -1.505 | 0.475  |
| H | 4.490  | 2.633  | 3.339  |
| N | 0.828  | -1.158 | 0.907  |
| C | -5.179 | 1.847  | 3.164  |
| H | 0.004  | 0.282  | 2.178  |
| C | 2.862  | 1.319  | 2.831  |
| C | 0.982  | -0.187 | 2.060  |
| H | -5.845 | 2.422  | 3.800  |
| H | -0.019 | -1.726 | 1.131  |
| O | -1.674 | -1.763 | 1.479  |
| C | 1.999  | -2.122 | 0.728  |
| H | 4.078  | -2.097 | -0.846 |
| O | 0.453  | -3.555 | -0.377 |
| C | -4.733 | -0.137 | 1.856  |
| C | 1.592  | -3.076 | -0.411 |
| H | 2.128  | -3.964 | -3.385 |
| H | 4.232  | -1.923 | 2.414  |
| C | -5.584 | 0.603  | 2.674  |
| H | 2.686  | 0.991  | 3.852  |
| N | 2.486  | -3.397 | -1.388 |
| H | 1.101  | -4.757 | -2.160 |
| H | 2.911  | -1.394 | 3.453  |
| H | 1.172  | -0.740 | 2.975  |
| C | 2.104  | -4.401 | -2.382 |
| C | 3.849  | -2.897 | -1.544 |
| H | -5.056 | -1.105 | 1.487  |
| C | 3.340  | -2.260 | 2.952  |
| H | 4.042  | -4.031 | 0.993  |
| H | 3.980  | -2.510 | -2.560 |
| C | 2.366  | -3.004 | 2.009  |
| H | -6.562 | 0.207  | 2.930  |
| H | 4.571  | -3.708 | -1.392 |
| C | 3.130  | -4.273 | 1.547  |
| H | 3.671  | -2.949 | 3.736  |

H 2.808 -5.240 -2.352  
H 2.511 -4.935 0.939  
H 0.546 -2.673 3.237  
C 1.109 -3.481 2.765  
H 3.433 -4.834 2.435  
H 0.429 -4.015 2.098  
H 1.413 -4.166 3.563

SCF Done: E(RB3LYP) = -2349.81121449 A.U. after 1 cycles

|                | 1         | 2       | 3       |
|----------------|-----------|---------|---------|
|                | A         | A       | A       |
| Frequencies -- | -309.7171 | 15.8257 | 27.8170 |
| Red. masses -- | 8.1218    | 5.5670  | 3.9897  |

Zero-point correction= 0.861950 (Hartree/Particle)  
Thermal correction to Energy= 0.909242  
Thermal correction to Enthalpy= 0.910186  
Thermal correction to Gibbs Free Energy= 0.782800  
Sum of electronic and zero-point Energies= -2348.949264  
Sum of electronic and thermal Energies= -2348.901973  
Sum of electronic and thermal Enthalpies= -2348.901028  
Sum of electronic and thermal Free Energies= -2349.028414

| Item          | Value    | Threshold | Converged? |
|---------------|----------|-----------|------------|
| Maximum Force | 0.000000 | 0.000450  | YES        |
| RMS Force     | 0.000000 | 0.000300  | YES        |

**Transition State Energy for Complex S-TS1 (not shown in manuscript; see Scheme S2b)**

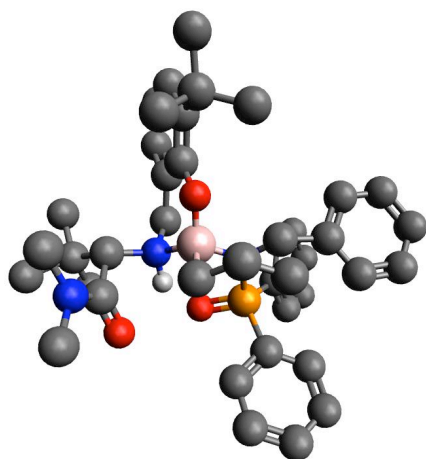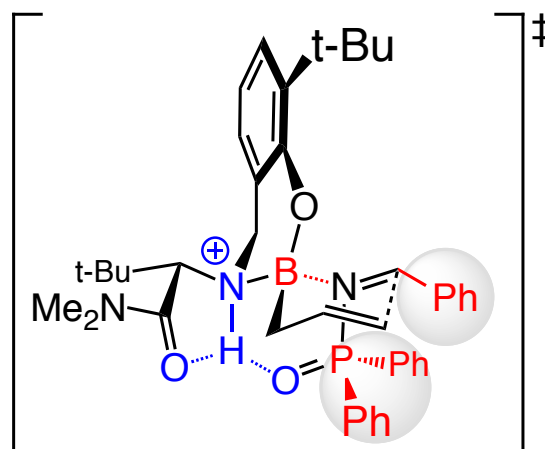

-----  
Cartesian coordinates (Angstroms):  
-----

H 3.751 2.814 -3.386  
H 1.600 4.186 -3.258  
H 3.742 5.158 -2.730  
C 3.627 2.506 -2.342  
H 4.626 2.381 -1.911  
C 1.458 3.814 -2.238

|   |        |        |        |
|---|--------|--------|--------|
| H | 3.123  | 1.538  | -2.327 |
| C | 3.618  | 4.902  | -1.674 |
| H | 0.874  | 2.895  | -2.297 |
| H | 0.874  | 4.561  | -1.689 |
| H | 4.618  | 4.824  | -1.236 |
| C | 2.830  | 3.581  | -1.563 |
| H | 3.096  | 5.737  | -1.195 |
| H | 2.587  | -4.468 | -1.957 |
| O | 1.682  | -3.320 | -0.246 |
| H | 3.273  | -3.522 | -3.306 |
| C | 3.431  | -3.861 | -2.276 |
| H | 4.349  | -4.459 | -2.244 |
| O | 1.449  | 1.133  | -0.699 |
| C | 2.650  | 3.137  | -0.094 |
| H | 3.638  | 4.856  | 0.738  |
| H | 1.839  | -1.100 | -2.200 |
| C | 2.645  | -2.557 | -0.383 |
| C | 2.006  | 1.929  | 0.274  |
| H | -1.628 | 0.879  | -3.621 |
| B | 0.744  | -0.105 | -0.450 |
| C | -1.216 | 0.149  | -2.933 |
| N | 3.558  | -2.710 | -1.382 |
| C | 3.149  | 3.916  | 0.961  |
| H | 3.444  | -0.616 | 0.298  |
| C | 0.790  | -0.944 | -1.951 |
| C | 2.813  | -1.429 | 0.653  |
| H | 1.687  | -2.174 | 3.275  |
| C | 0.155  | -0.027 | -2.868 |
| H | 3.597  | -0.206 | 3.217  |
| N | 1.422  | -0.830 | 0.837  |
| H | 0.273  | -1.895 | -1.838 |
| C | 1.949  | 1.506  | 1.609  |
| H | 4.733  | -0.973 | -1.039 |
| C | 4.706  | -1.856 | -1.672 |
| C | 3.055  | 3.531  | 2.299  |
| H | 4.661  | -1.527 | -2.715 |
| C | 2.456  | -2.812 | 2.833  |
| H | 0.784  | 0.715  | -3.355 |
| C | 4.233  | -0.973 | 2.778  |
| H | 1.952  | -3.587 | 2.253  |
| C | 3.480  | -2.051 | 1.964  |
| H | 3.456  | 4.172  | 3.077  |
| H | 4.978  | -0.464 | 2.158  |
| C | 1.301  | 0.191  | 1.946  |
| C | 2.470  | 2.314  | 2.622  |
| H | 5.639  | -2.412 | -1.531 |
| H | 2.983  | -3.295 | 3.662  |
| H | 0.231  | 0.304  | 2.121  |
| H | 4.767  | -1.457 | 3.602  |
| H | 1.712  | -0.222 | 2.862  |
| H | 2.412  | 1.985  | 3.656  |
| C | 4.563  | -3.080 | 1.545  |
| H | 5.336  | -2.637 | 0.910  |
| H | 4.140  | -3.947 | 1.034  |
| H | 5.060  | -3.444 | 2.448  |
| H | -1.867 | -0.684 | -2.686 |
| H | 0.768  | -1.597 | 1.104  |
| H | -3.176 | 2.810  | 3.452  |
| H | -5.140 | 1.636  | 4.419  |
| C | -3.423 | 1.804  | 3.128  |
| C | -4.525 | 1.143  | 3.672  |
| C | -2.633 | 1.174  | 2.168  |

```

H -1.775  1.696  1.758
C -4.831 -0.156  3.263
H -5.679 -0.679  3.693
H -1.790  3.507 -0.374
C -2.945 -0.124  1.736
C -4.043 -0.792  2.306
H -0.558  1.797 -1.282
H -3.908  4.769 -0.355
C -2.705  3.024 -0.706
C -1.313  1.041 -1.102
O -0.852 -1.903  1.512
H -4.278 -1.811  2.017
C -3.901  3.739 -0.697
P -1.806 -1.069  0.689
C -2.671  1.683 -1.129
N -0.830  0.110 -0.202
C -5.078  3.138 -1.145
H -0.955 -3.432 -0.608
C -2.716 -2.183 -0.429
C -3.852  1.102 -1.607
H -6.008  3.696 -1.151
C -1.990 -3.291 -0.906
C -5.046  1.823 -1.609
H -3.843  0.099 -2.011
H -4.663 -1.241 -0.357
C -4.077 -2.064 -0.749
C -2.610 -4.233 -1.726
H -2.042 -5.083 -2.090
H -5.950  1.357 -1.989
C -4.694 -3.018 -1.559
C -3.960 -4.096 -2.056
H -5.750 -2.923 -1.793
H -4.443 -4.836 -2.687

```

-----

SCF Done: E(RB3LYP) = -2349.80692498 A.U. after 1 cycles

|                | 1         | 2       | 3       |
|----------------|-----------|---------|---------|
|                | A         | A       | A       |
| Frequencies -- | -344.5655 | 12.7728 | 18.2767 |
| Red. masses -- | 9.0648    | 5.1910  | 4.1843  |

Zero-point correction= 0.862291 (Hartree/Particle)

Thermal correction to Energy= 0.909628

Thermal correction to Enthalpy= 0.910572

Thermal correction to Gibbs Free Energy= 0.782402

Sum of electronic and zero-point Energies= -2348.944634

Sum of electronic and thermal Energies= -2348.897297

Sum of electronic and thermal Enthalpies= -2348.896353

Sum of electronic and thermal Free Energies= -2349.024523

| Item          | Value    | Threshold | Converged? |
|---------------|----------|-----------|------------|
| Maximum Force | 0.000001 | 0.000450  | YES        |
| RMS Force     | 0.000000 | 0.000300  | YES        |

**Transition State Energy for Complex (S)-TS2 (Scheme S2b; Labeled III in Figure 2d of the Manuscript)**

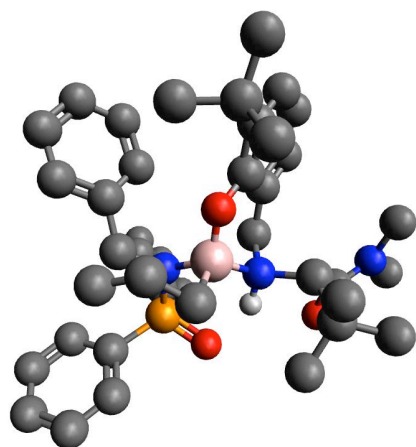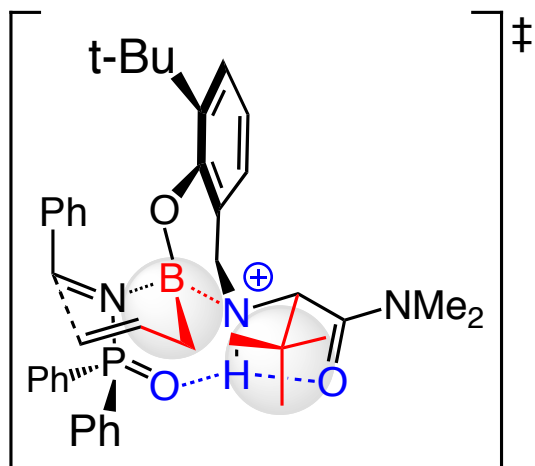

-----  
Cartesian coordinates (Angstroms):  
-----

H -0.181 3.850 2.912  
H -3.556 3.322 -2.949  
C 0.467 3.883 2.042  
H 0.240 1.790 1.642  
H -4.343 5.027 -1.425  
H 0.893 5.988 2.223  
H 2.342 2.756 -2.636  
C 0.693 2.714 1.313  
C 1.070 5.079 1.658  
C -3.425 2.604 -2.133  
H -4.351 2.024 -2.048  
H -1.941 4.884 -1.814  
C -4.278 4.343 -0.574  
H -2.618 1.923 -2.406  
H -5.244 3.835 -0.485  
H -0.031 2.235 -2.882  
C 2.005 1.735 -2.495  
H 3.305 0.613 4.518  
C -3.119 3.353 -0.814  
C -1.829 4.189 -0.974  
C 0.680 1.422 -2.758  
H -4.123 4.951 0.323  
C 1.527 2.721 0.186  
H 2.761 0.974 -2.660  
C 1.920 5.096 0.548  
H 3.407 -1.655 5.523  
H -0.957 3.562 -1.159  
C 3.125 -0.263 3.903  
H -1.631 4.779 -0.074  
C 3.180 -1.540 4.468  
C 1.920 1.442 -0.488  
C 2.154 3.928 -0.172  
H 2.409 6.017 0.249  
H 2.775 0.891 2.132  
H 3.004 1.335 -0.489  
C 2.833 -0.109 2.548  
C -2.979 2.336 0.343

C 0.161 0.095 -2.581  
H 4.917 0.061 0.693  
H -4.553 3.194 1.527  
O -1.128 1.179 -0.692  
H -0.764 -0.070 -3.127  
C 2.938 -2.666 3.679  
H 0.886 -0.692 -2.785  
H 7.024 0.246 -0.574  
C -3.823 2.397 1.463  
H 2.841 3.960 -1.011  
H 2.971 -3.658 4.119  
C -2.034 1.281 0.337  
N 1.252 0.249 -0.277  
C 2.598 -1.240 1.749  
B -0.233 0.078 -0.895  
C 4.968 -0.328 -0.318  
C 2.648 -2.521 2.323  
C 6.164 -0.234 -1.030  
P 2.265 -1.174 -0.035  
H 2.444 -3.391 1.708  
C -3.778 1.469 2.503  
C 3.851 -0.950 -0.900  
C -2.010 0.311 1.353  
H -2.997 -1.148 -0.495  
H -4.455 1.566 3.346  
N -0.910 -1.264 -0.227  
C 6.257 -0.768 -2.316  
H -1.379 -1.695 1.823  
C -2.885 0.407 2.436  
C -1.049 -0.843 1.233  
H 7.192 -0.699 -2.865  
H -0.193 -2.019 -0.260  
O 1.538 -2.398 -0.532  
C -2.246 -1.920 -0.643  
H -4.649 -1.587 0.296  
O -1.433 -3.843 0.502  
C 3.959 -1.508 -2.187  
C -2.404 -3.096 0.352  
H -4.024 -4.150 2.877  
H -4.040 -1.215 -2.801  
C 5.158 -1.411 -2.891  
H -2.859 -0.351 3.216  
N -3.579 -3.276 1.015  
H -2.764 -4.975 1.917  
H -2.500 -0.394 -2.892  
H -0.051 -0.588 1.588  
C -3.718 -4.456 1.871  
C -4.794 -2.474 0.905  
H 3.116 -2.041 -2.614  
C -2.978 -1.364 -3.022  
H -4.409 -3.312 -1.719  
H -5.111 -2.152 1.902  
C -2.397 -2.474 -2.116  
H 5.238 -1.847 -3.881  
H -5.602 -3.070 0.466  
C -3.446 -3.617 -2.139  
H -2.897 -1.648 -4.076  
H -4.483 -5.128 1.465  
H -3.097 -4.510 -1.614  
H -0.275 -2.366 -2.746  
C -1.088 -3.083 -2.653  
H -3.624 -3.897 -3.182



H -0.743 -3.884 -1.994  
 H -1.270 -3.509 -3.644  
 -----

SCF Done: E(RB3LYP) = -2349.80034463 A.U. after 1 cycles

|                | 1         | 2       | 3       |
|----------------|-----------|---------|---------|
|                | A         | A       | A       |
| Frequencies -- | -335.3640 | 16.4052 | 22.4182 |
| Red. masses -- | 8.2371    | 5.2097  | 4.3949  |

Zero-point correction= 0.861454 (Hartree/Particle)  
 Thermal correction to Energy= 0.908946  
 Thermal correction to Enthalpy= 0.909890  
 Thermal correction to Gibbs Free Energy= 0.781405  
 Sum of electronic and zero-point Energies= -2348.938890  
 Sum of electronic and thermal Energies= -2348.891398  
 Sum of electronic and thermal Enthalpies= -2348.890454  
 Sum of electronic and thermal Free Energies= -2349.018940

| Item          | Value    | Threshold | Converged? |
|---------------|----------|-----------|------------|
| Maximum Force | 0.000000 | 0.000450  | YES        |
| RMS Force     | 0.000000 | 0.000300  | YES        |

### Transition State Energy for Complex (S)-TS3 (not shown in manuscript; see Scheme S2b)

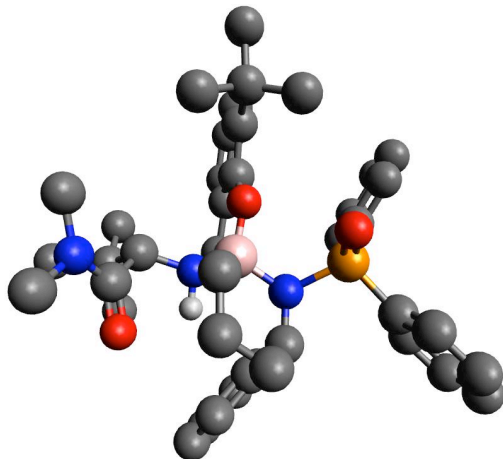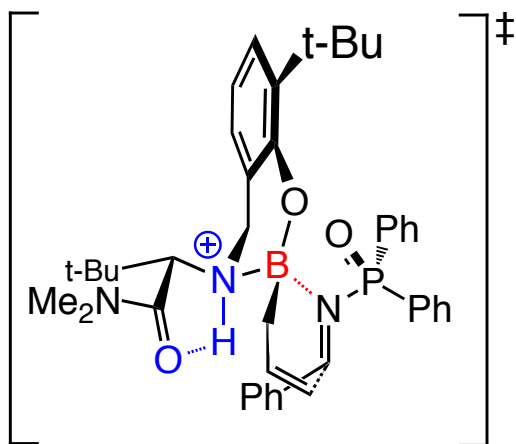

-----  
 Cartesian coordinates (Angstroms):  
 -----

C -0.273 -3.861 2.824  
 C -0.769 -2.924 1.919  
 C 0.422 -4.980 2.362  
 C -0.573 -3.082 0.532  
 C 0.608 -5.154 0.991  
 C 0.110 -4.219 0.083  
 C 4.390 -1.903 -3.060  
 O 2.822 -2.546 -0.908  
 N 3.992 -0.944 -2.028  
 C 3.245 -1.383 -0.983  
 C 5.356 -1.119 0.771  
 C 4.166 0.318 2.380  
 C 4.497 0.410 -2.243  
 C 3.958 -0.849 1.388

C 2.946 -0.462 0.210  
C 3.532 -2.133 2.129  
B 0.358 -0.146 -0.643  
N 1.453 -0.646 0.514  
C 0.985 0.068 1.766  
O 0.409 1.279 -0.682  
C 1.056 1.562 1.598  
C 0.807 2.111 0.332  
C 1.369 2.396 2.673  
C -0.523 3.952 -1.935  
C 0.982 3.494 0.076  
C 0.897 4.102 -1.343  
C 1.457 3.767 2.474  
C 1.924 3.404 -2.267  
C 1.288 4.289 1.190  
C 1.239 5.607 -1.339  
C -2.803 2.146 2.914  
C -3.265 3.407 2.533  
C -2.513 1.186 1.945  
C -3.439 3.708 1.181  
C -2.678 1.485 0.585  
C -3.149 2.752 0.208  
O -2.312 0.865 -2.119  
P -2.483 0.276 -0.751  
C -3.964 -0.797 -0.691  
C -4.577 -1.076 -1.923  
C -4.554 -1.265 0.496  
C -5.749 -1.832 -1.968  
C -5.724 -2.021 0.444  
C -6.320 -2.308 -0.788  
N -1.092 -0.756 -0.265  
C 0.562 -0.676 -2.232  
C 0.267 -2.092 -2.396  
C -1.302 -2.094 -0.341  
C -1.008 -2.590 -2.474  
H -0.440 -3.719 3.887  
H -1.342 -2.079 2.287  
H 0.809 -5.711 3.064  
H 1.145 -6.021 0.620  
H 0.269 -4.381 -0.974  
H 3.913 -1.653 -4.014  
H 4.091 -2.903 -2.755  
H 5.476 -1.867 -3.193  
H 6.062 -1.308 1.584  
H 5.733 -0.258 0.210  
H 5.366 -1.996 0.121  
H 3.302 0.536 3.004  
H 4.439 1.241 1.859  
H 4.989 0.064 3.054  
H 4.271 0.715 -3.270  
H 5.584 0.443 -2.107  
H 4.036 1.132 -1.575  
H 3.069 0.594 -0.018  
H 2.600 -2.025 2.690  
H 4.306 -2.397 2.856  
H 3.417 -2.970 1.437  
H -0.037 -0.273 1.926  
H 1.571 -0.263 2.618  
H 1.541 1.968 3.657  
H -1.252 4.482 -1.315  
H -0.833 2.910 -2.017  
H -0.551 4.398 -2.935

```

H 1.686 4.429 3.302
H 2.943 3.534 -1.885
H 1.885 3.847 -3.268
H 1.717 2.337 -2.362
H 1.409 5.356 1.057
H 2.247 5.804 -0.960
H 0.527 6.191 -0.747
H 1.194 5.984 -2.366
H -2.668 1.910 3.965
H -3.491 4.152 3.289
H -2.163 0.208 2.257
H -3.801 4.687 0.883
H -3.280 2.981 -0.844
H -4.141 -0.678 -2.833
H -4.119 -1.030 1.462
H -6.220 -2.039 -2.924
H -6.175 -2.379 1.364
H -7.234 -2.892 -0.823
H 1.573 -0.421 -2.549
H -0.156 -0.035 -2.749
H 1.094 -2.787 -2.284
H -2.332 -2.394 -0.516
H -1.832 -1.944 -2.757
H -1.186 -3.657 -2.565
H 1.332 -1.656 0.648

```

-----

SCF Done: E(RB3LYP) = -2349.80118264 A.U. after 1 cycles

|                | 1         | 2       | 3       |
|----------------|-----------|---------|---------|
|                | A         | A       | A       |
| Frequencies -- | -220.1960 | 21.2213 | 23.3750 |
| Red. masses -- | 6.5227    | 5.3294  | 4.2832  |

Zero-point correction= 0.862703 (Hartree/Particle)  
Thermal correction to Energy= 0.909800  
Thermal correction to Enthalpy= 0.910744  
Thermal correction to Gibbs Free Energy= 0.784683  
Sum of electronic and zero-point Energies= -2348.938480  
Sum of electronic and thermal Energies= -2348.891383  
Sum of electronic and thermal Enthalpies= -2348.890439  
Sum of electronic and thermal Free Energies= -2349.016500

| Item          | Value    | Threshold | Converged? |
|---------------|----------|-----------|------------|
| Maximum Force | 0.000001 | 0.000450  | YES        |
| RMS Force     | 0.000000 | 0.000300  | YES        |

**Transition State Energy for Complex (S)-TS4 (not shown in manuscript; see Scheme S2b)**

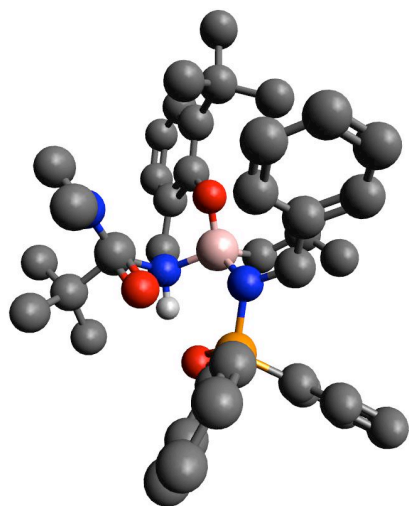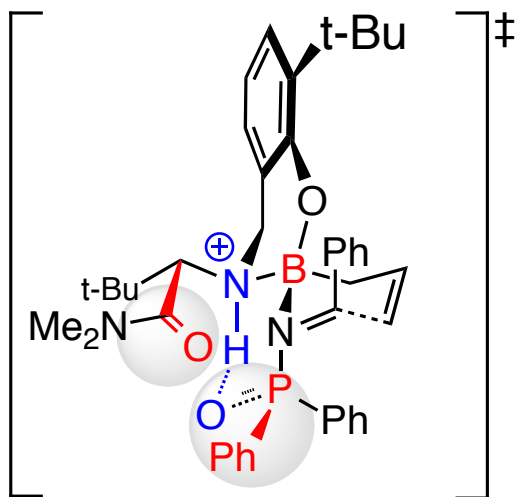

-----  
Cartesian coordinates (Angstroms):  
-----

|   |        |        |        |
|---|--------|--------|--------|
| H | 1.303  | -1.944 | 3.939  |
| H | 3.208  | -3.984 | 0.832  |
| C | 0.753  | -2.507 | 3.192  |
| H | 0.359  | -0.776 | 1.967  |
| H | 5.522  | -3.454 | 1.165  |
| H | 0.956  | -4.387 | 4.226  |
| H | -1.023 | -3.966 | -1.454 |
| C | 0.240  | -1.846 | 2.074  |
| C | 0.555  | -3.877 | 3.356  |
| C | 3.104  | -3.231 | 0.044  |
| H | 3.304  | -3.723 | -0.915 |
| H | 3.873  | -2.143 | 2.448  |
| C | 5.511  | -2.720 | 0.353  |
| H | 2.075  | -2.879 | 0.054  |
| H | 5.774  | -3.248 | -0.569 |
| H | 1.063  | -2.851 | -2.012 |
| C | -1.043 | -2.925 | -1.754 |
| H | -5.318 | 3.294  | 2.053  |
| C | 4.108  | -2.080 | 0.280  |
| C | 3.848  | -1.399 | 1.644  |
| C | 0.126  | -2.325 | -2.182 |
| H | 6.294  | -1.986 | 0.568  |
| C | -0.484 | -2.553 | 1.103  |
| H | -1.993 | -2.568 | -2.138 |
| C | -0.181 | -4.587 | 2.402  |
| H | -5.146 | 1.938  | 4.129  |
| H | 2.878  | -0.903 | 1.670  |
| C | -4.688 | 2.410  | 2.077  |
| H | 4.627  | -0.656 | 1.850  |
| C | -4.589 | 1.649  | 3.242  |
| C | -1.197 | -1.825 | 0.014  |
| C | -0.705 | -3.930 | 1.294  |
| H | -0.356 | -5.650 | 2.529  |
| H | -4.049 | 2.635  | 0.033  |

H -2.257 -2.072 0.014  
C -3.976 2.039 0.937  
C 4.007 -1.021 -0.840  
C 0.207 -0.946 -2.562  
H -4.543 -1.429 0.263  
H 6.052 -1.254 -1.447  
O 1.656 -0.573 -0.415  
H 1.106 -0.749 -3.142  
C -3.769 0.520 3.271  
H -0.684 -0.548 -3.048  
H -6.177 -2.752 -1.026  
C 5.131 -0.714 -1.619  
H -1.300 -4.492 0.582  
H -3.682 -0.068 4.179  
C 2.818 -0.293 -1.120  
N -0.935 -0.514 -0.311  
C -3.153 0.903 0.962  
B 0.418 -0.114 -0.986  
C -4.531 -1.384 -0.822  
C -3.049 0.146 2.136  
C -5.465 -2.122 -1.549  
P -2.376 0.473 -0.618  
H -2.392 -0.715 2.187  
C 5.126 0.264 -2.614  
C -3.603 -0.566 -1.489  
C 2.814 0.726 -2.102  
H 2.303 2.214 -0.211  
H 6.025 0.459 -3.190  
N 0.634 1.499 -1.224  
C -5.496 -2.035 -2.943  
H 1.057 1.282 -3.283  
C 3.971 0.994 -2.841  
C 1.590 1.578 -2.378  
H -6.229 -2.604 -3.505  
H -0.300 1.870 -1.484  
O -2.021 1.655 -1.488  
C 1.235 2.374 -0.108  
H 3.510 2.089 1.232  
O -0.408 1.611 1.439  
C -3.658 -0.464 -2.890  
C 0.777 1.910 1.271  
H 1.719 0.880 4.138  
H 3.067 4.476 0.090  
C -4.598 -1.199 -3.611  
H 3.952 1.781 -3.590  
N 1.679 1.900 2.295  
H 0.118 1.481 3.621  
H 2.723 4.259 -1.629  
H 1.889 2.614 -2.522  
C 1.181 1.705 3.659  
C 3.092 2.266 2.221  
H -2.984 0.213 -3.404  
C 2.310 4.629 -0.685  
H 1.186 4.522 1.813  
H 3.648 1.642 2.925  
C 0.970 3.954 -0.311  
H -4.637 -1.111 -4.692  
H 3.251 3.315 2.497  
C 0.465 4.612 0.996  
H 2.166 5.708 -0.794  
H 1.342 2.613 4.251  
H -0.485 4.184 1.323

H 0.213 3.937 -2.398  
 C -0.081 4.267 -1.397  
 H 0.314 5.680 0.816  
 H -1.056 3.832 -1.163  
 H -0.205 5.352 -1.452

-----  
 SCF Done: E(RB3LYP) = -2349.79523369 A.U. after 1 cycles

|                | 1         | 2       | 3       |
|----------------|-----------|---------|---------|
|                | A         | A       | A       |
| Frequencies -- | -335.9124 | 12.6240 | 29.5812 |
| Red. masses -- | 8.2872    | 3.9844  | 5.0315  |

Zero-point correction= 0.862399 (Hartree/Particle)  
 Thermal correction to Energy= 0.909414  
 Thermal correction to Enthalpy= 0.910359  
 Thermal correction to Gibbs Free Energy= 0.783996  
 Sum of electronic and zero-point Energies= -2348.932835  
 Sum of electronic and thermal Energies= -2348.885819  
 Sum of electronic and thermal Enthalpies= -2348.884875  
 Sum of electronic and thermal Free Energies= -2349.011238

| Item          | Value    | Threshold | Converged? |
|---------------|----------|-----------|------------|
| Maximum Force | 0.000011 | 0.000450  | YES        |
| RMS Force     | 0.000002 | 0.000300  | YES        |

# Simple Organic Molecules as Catalysts for Enantioselective Synthesis of Amines and Alcohols

Daniel L. Silverio, Sebastian Torker, Tatiana Pilyugina, Erika M. Vieira, Marc L. Snapper, Fredrik Haeffner & Amir H. Hoveyda\*

*Department of Chemistry, Merkert Chemistry Center, Boston College, Chestnut Hill, Massachusetts 02467*

## SUPPLEMENTARY INFORMATION; PART C

| <b><i>Table of Contents</i></b>                                            | <b><i>Page</i></b> |
|----------------------------------------------------------------------------|--------------------|
| <i>NMR Spectra for Amino Acid-Based Aminophenols 2a–2h (Table 1)</i>       | S84                |
| <i>NMR Spectra for Aldimine and Isatin Substrates</i>                      | S92                |
| <i>NMR Spectra for Homoallylamides 4a–4n (Table 2) and S7</i>              | S101               |
| <i>NMR Spectra for Homoallylamides S8–S16 (Table 3)</i>                    | S116               |
| <i>NMR Spectra for Homoallylamides 4o and d<sub>2</sub>-4o (Figure 4b)</i> | S125               |
| <i>NMR Spectra for Homoallylamides 10-13 (Figure 4c)</i>                   | S128               |
| <i>NMR Spectra for Homoallylalcohols 15a-18 (Figure 5a), S17, and S18</i>  | S131               |
| <i>NMR Spectra for Allenylalcohols 20a-21 (Figure 5b) and S19</i>          | S138               |
| <i>NMR Spectra for <math>\alpha</math>-Hydroxy Alcohol 22 (Figure 5b)</i>  | S142               |

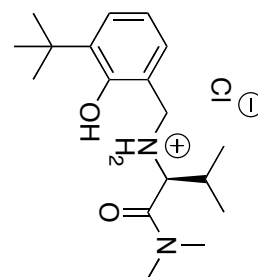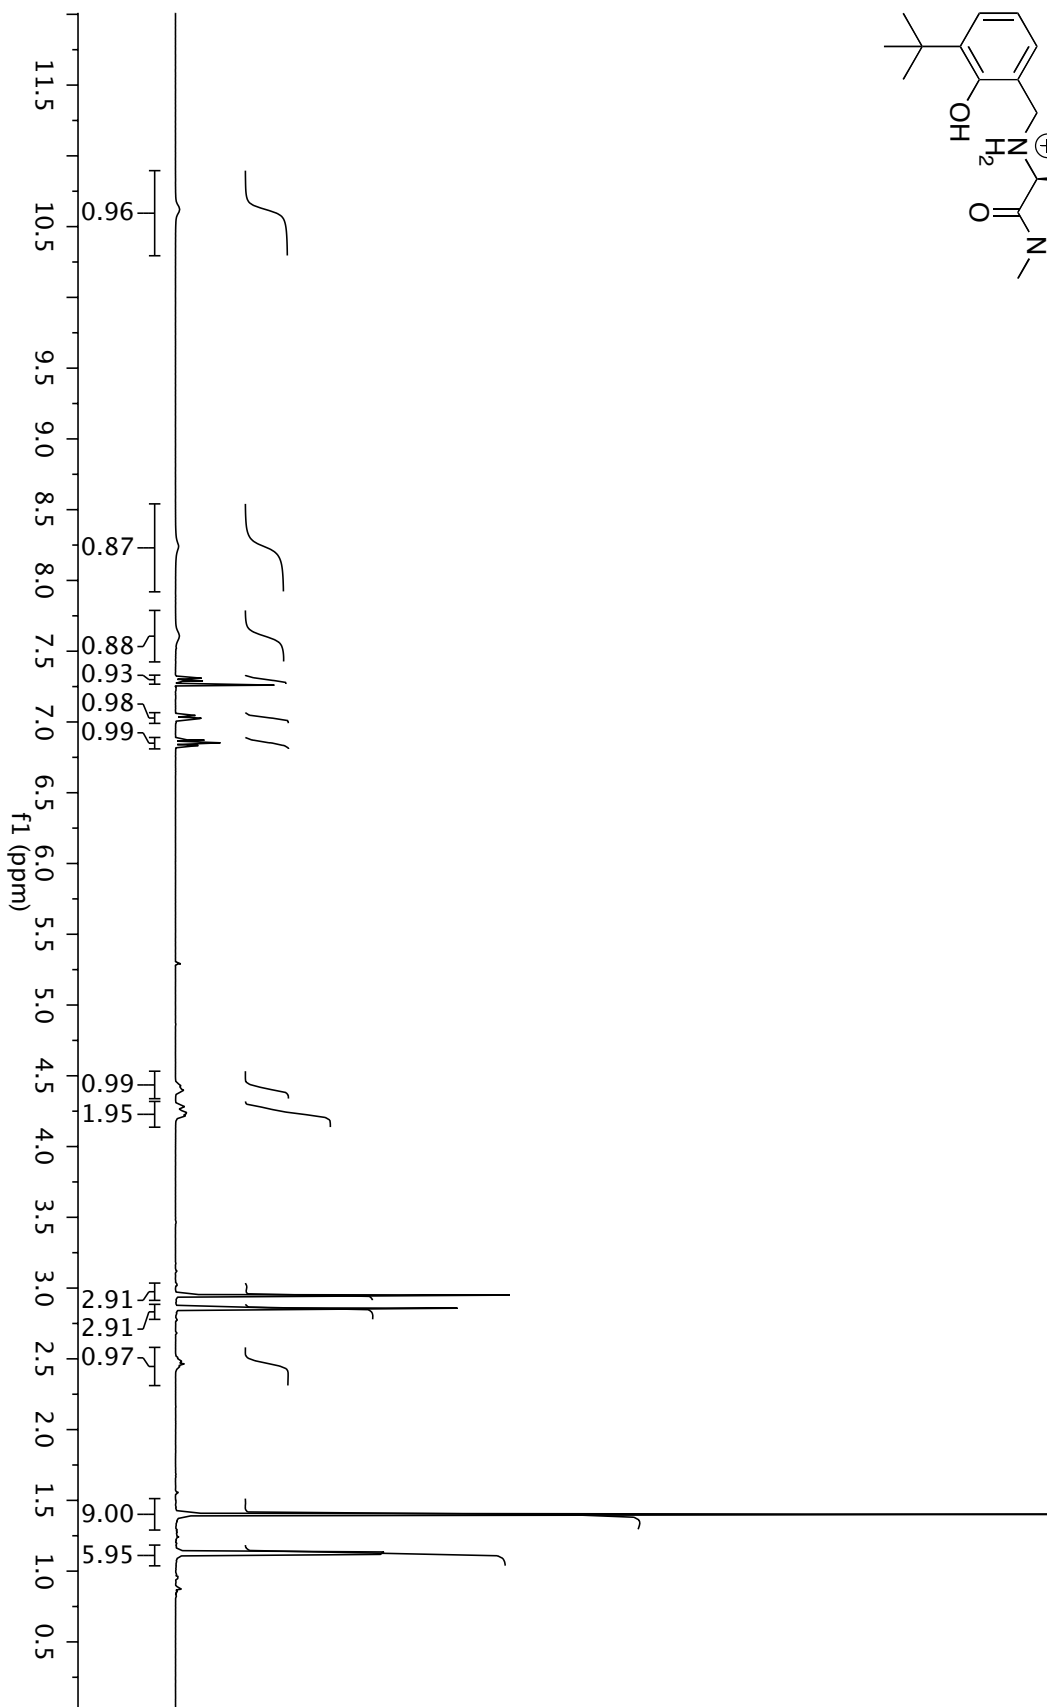



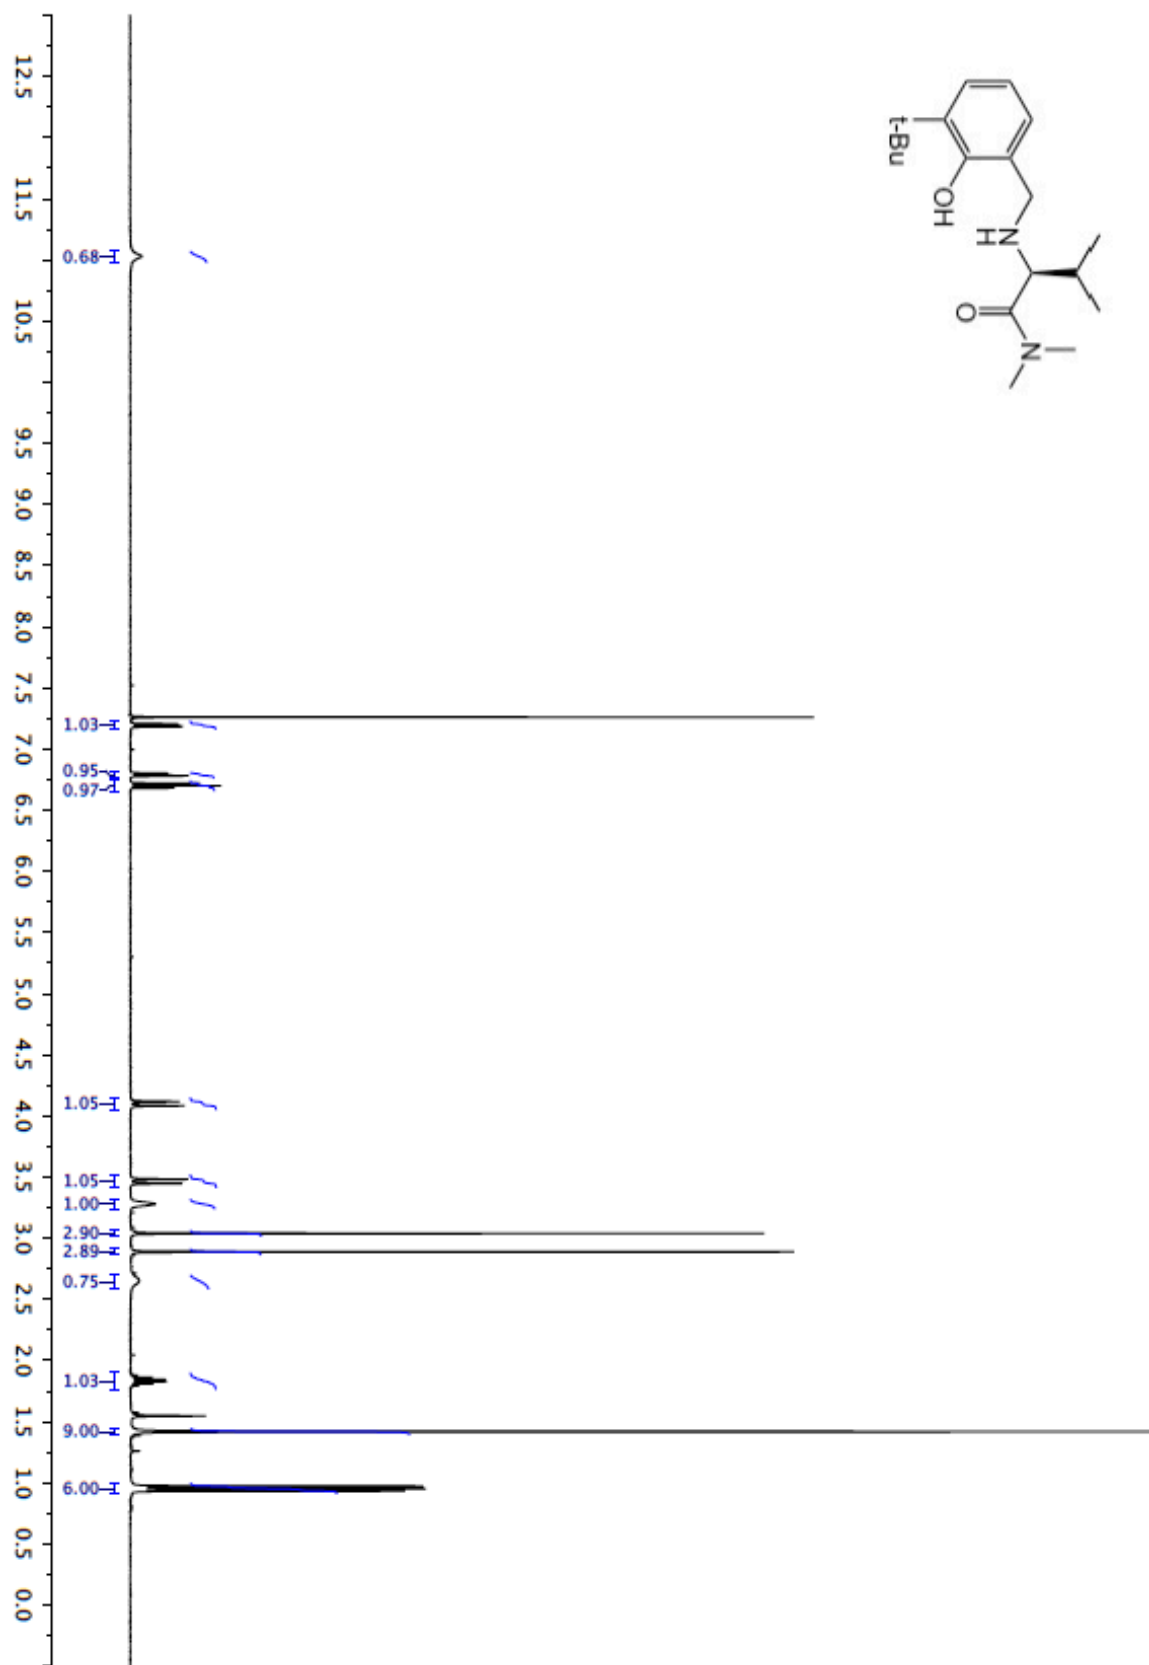

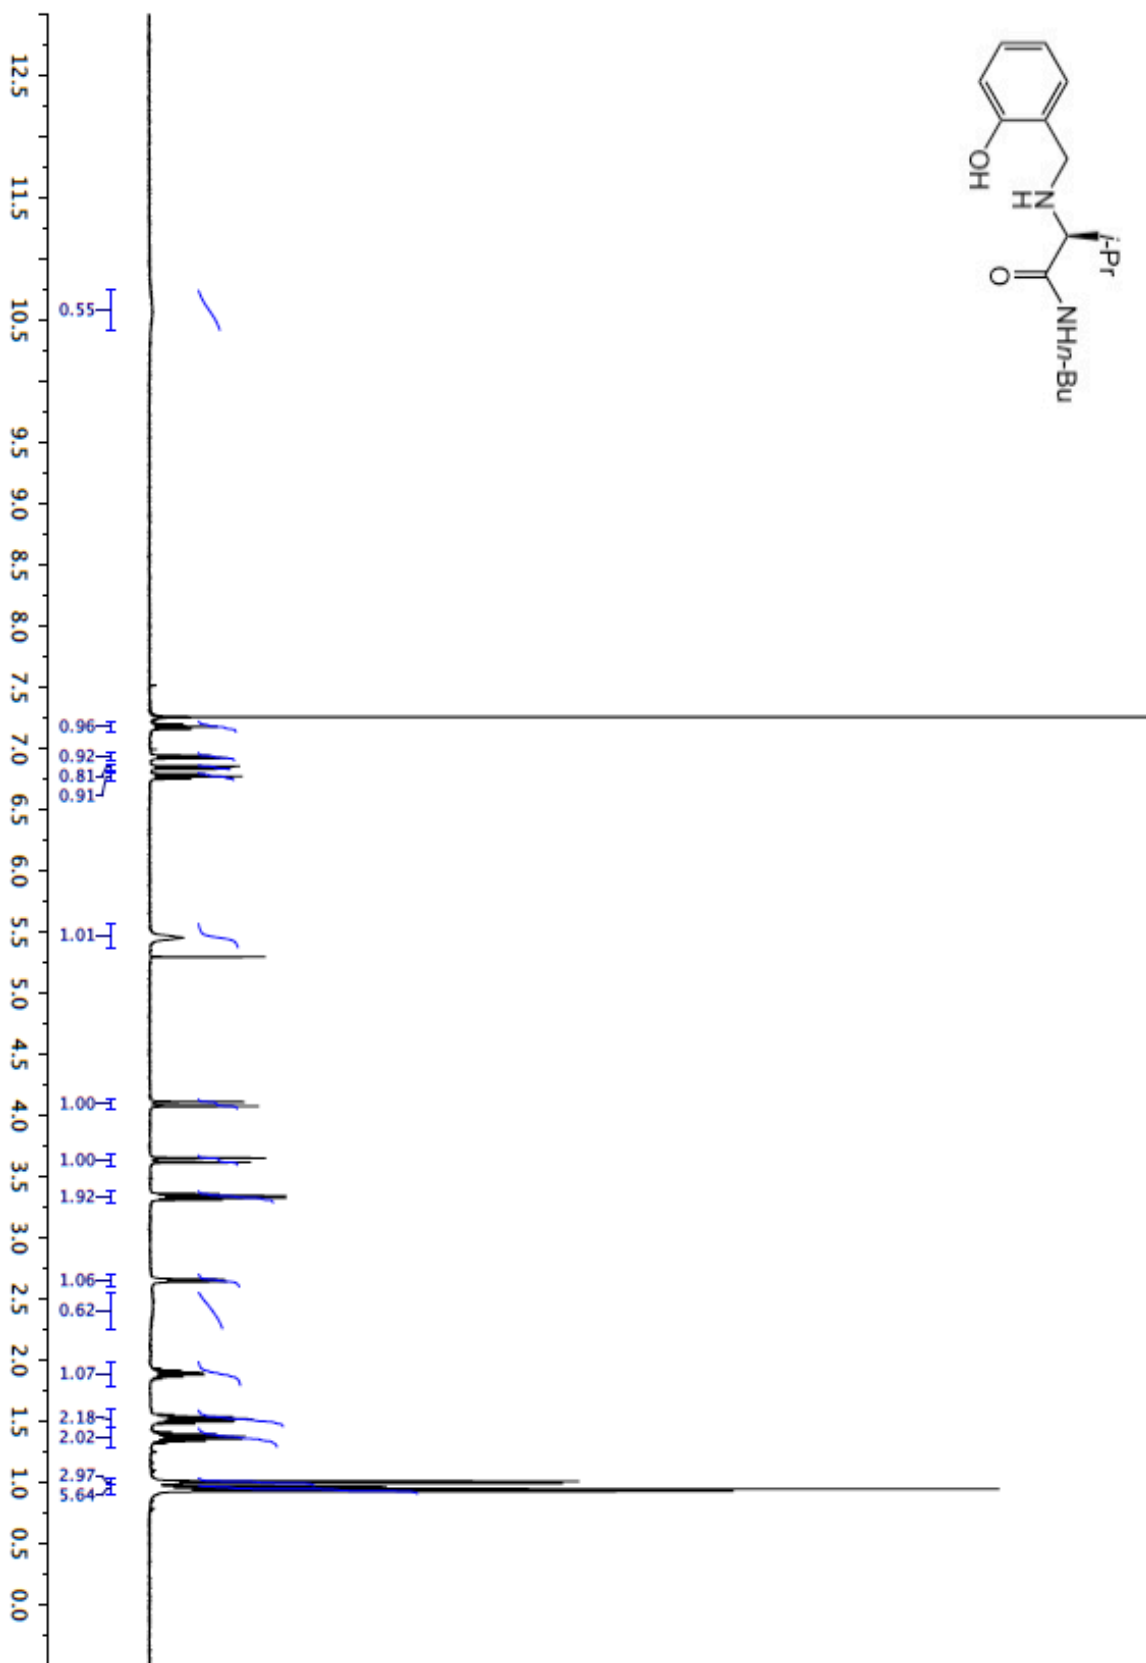

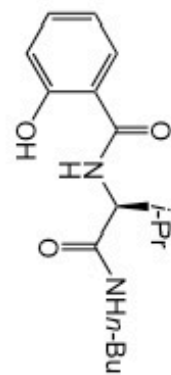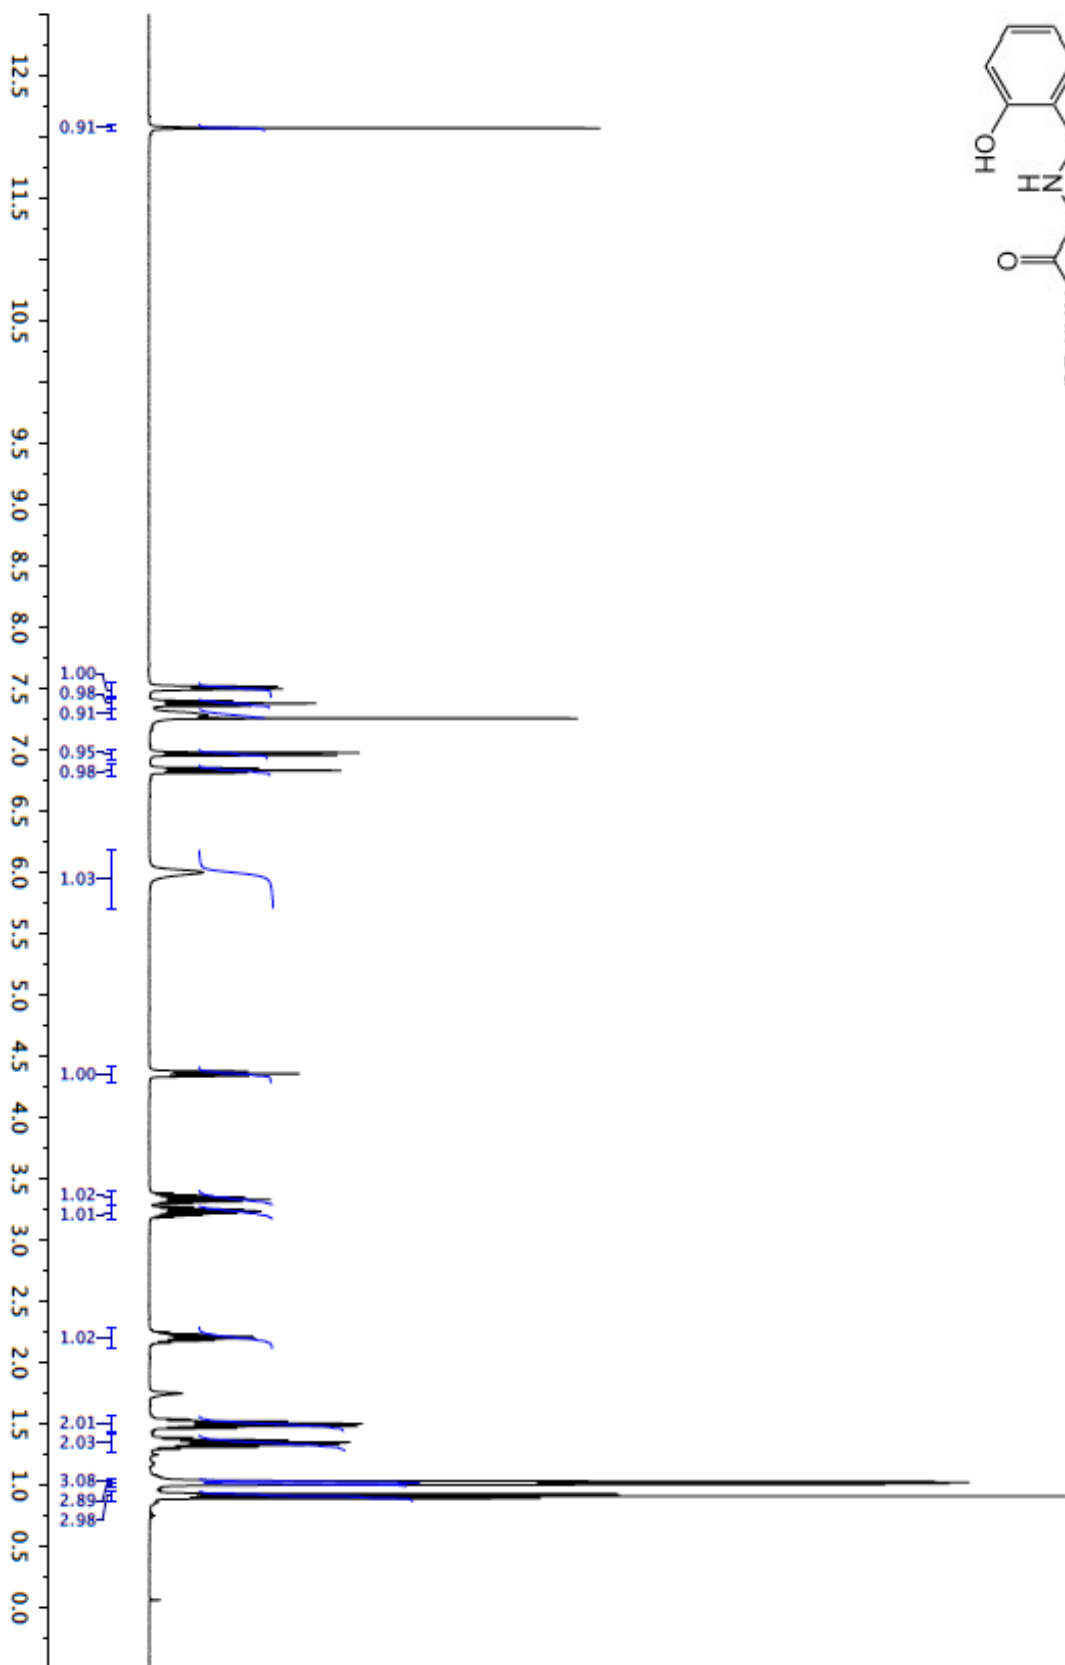

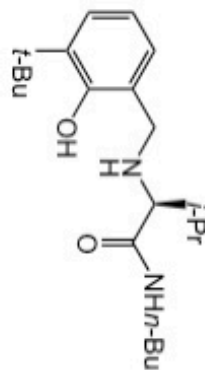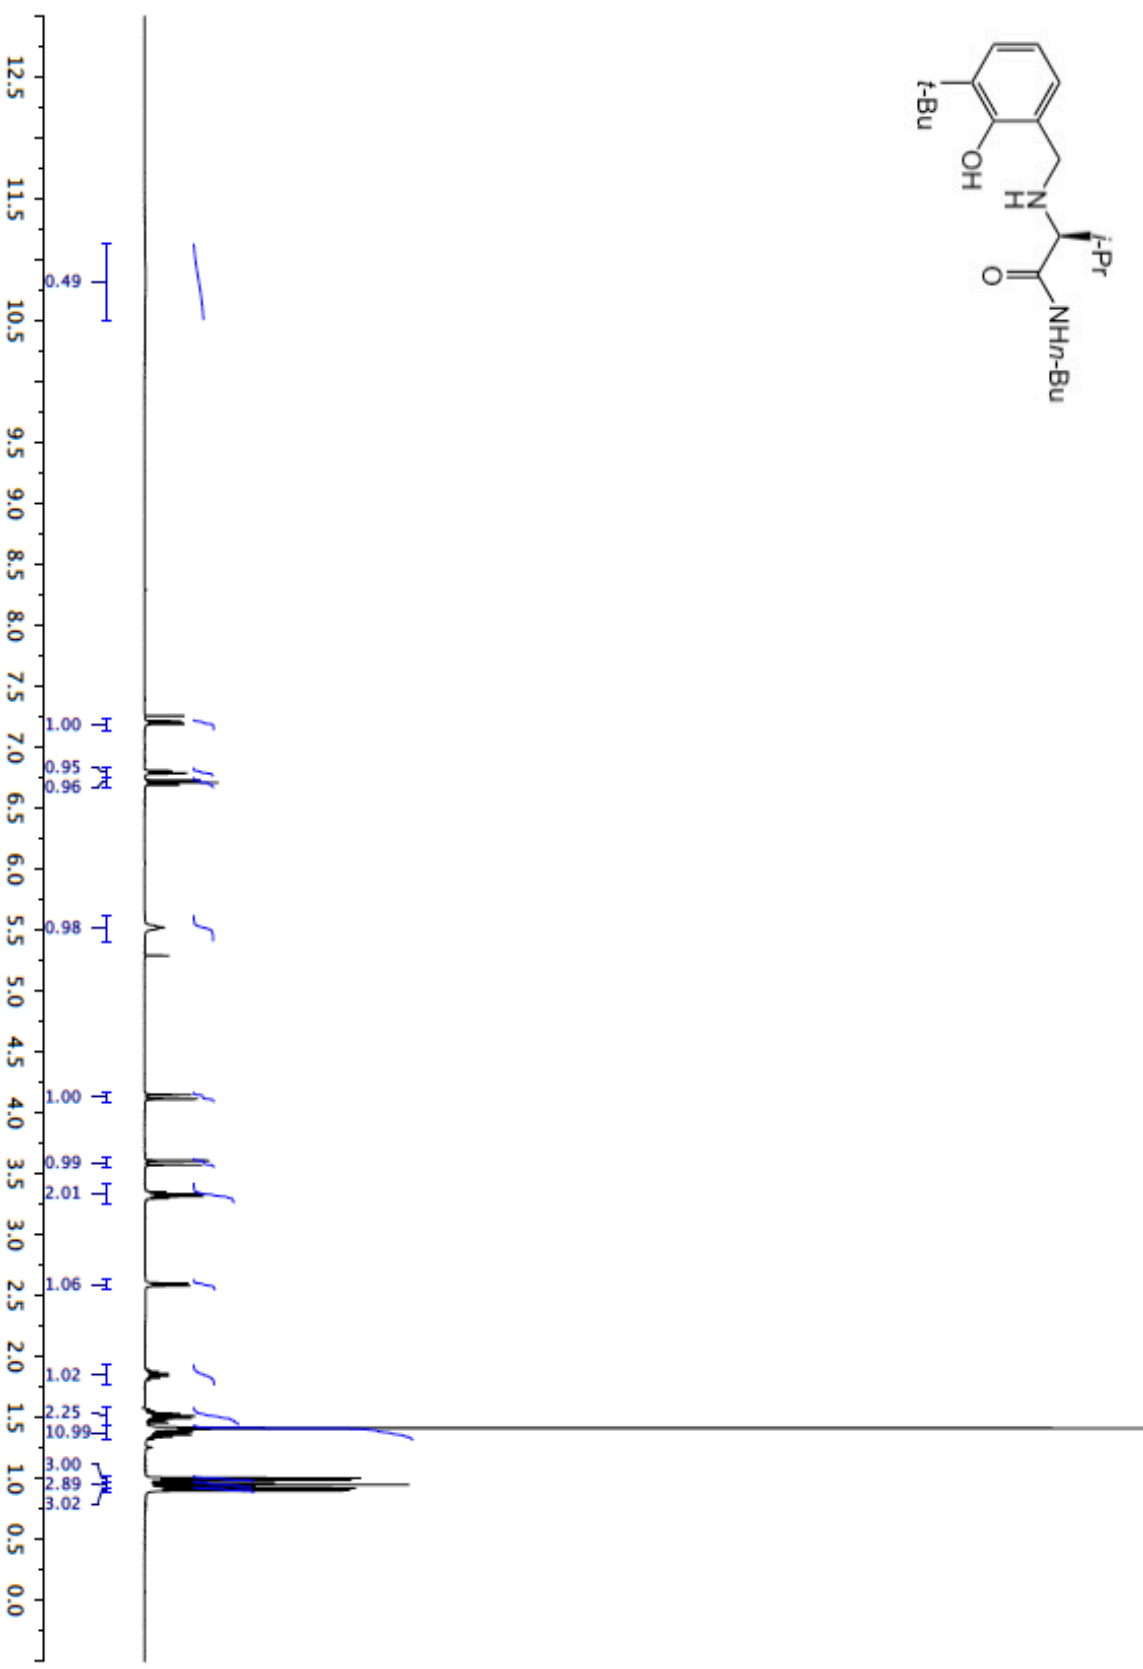

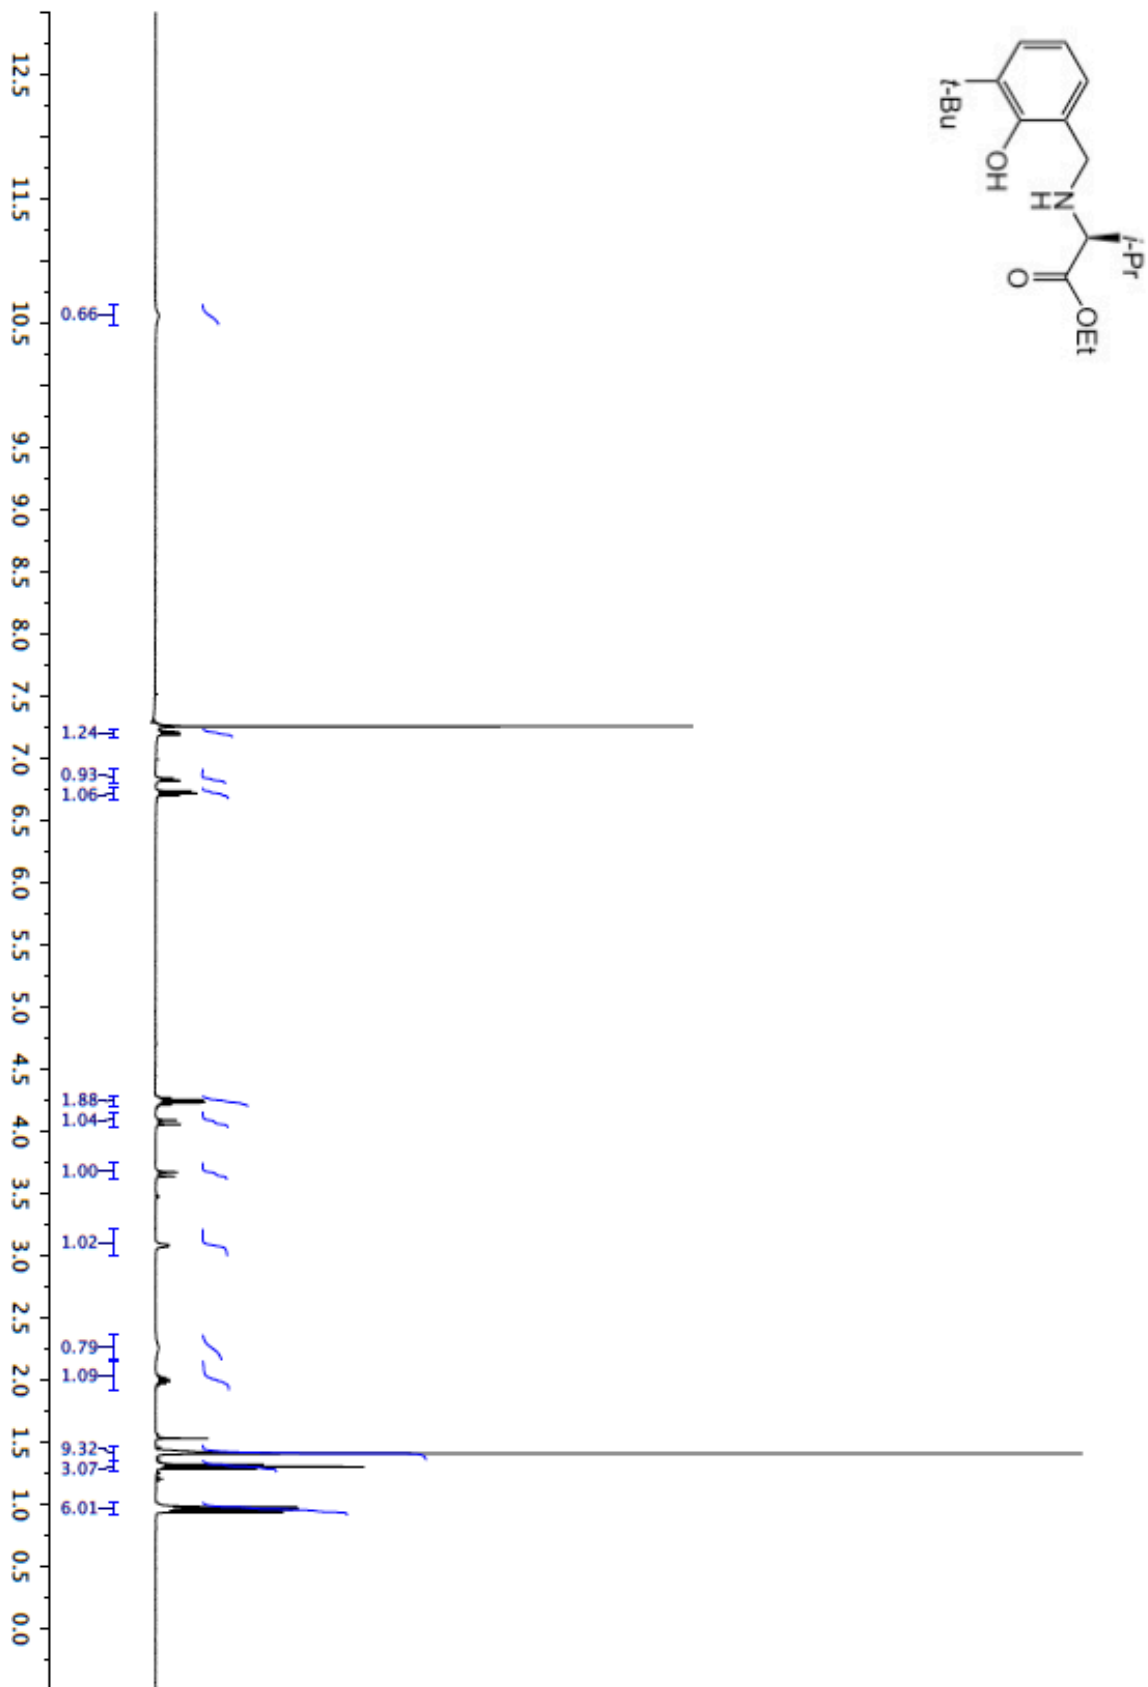

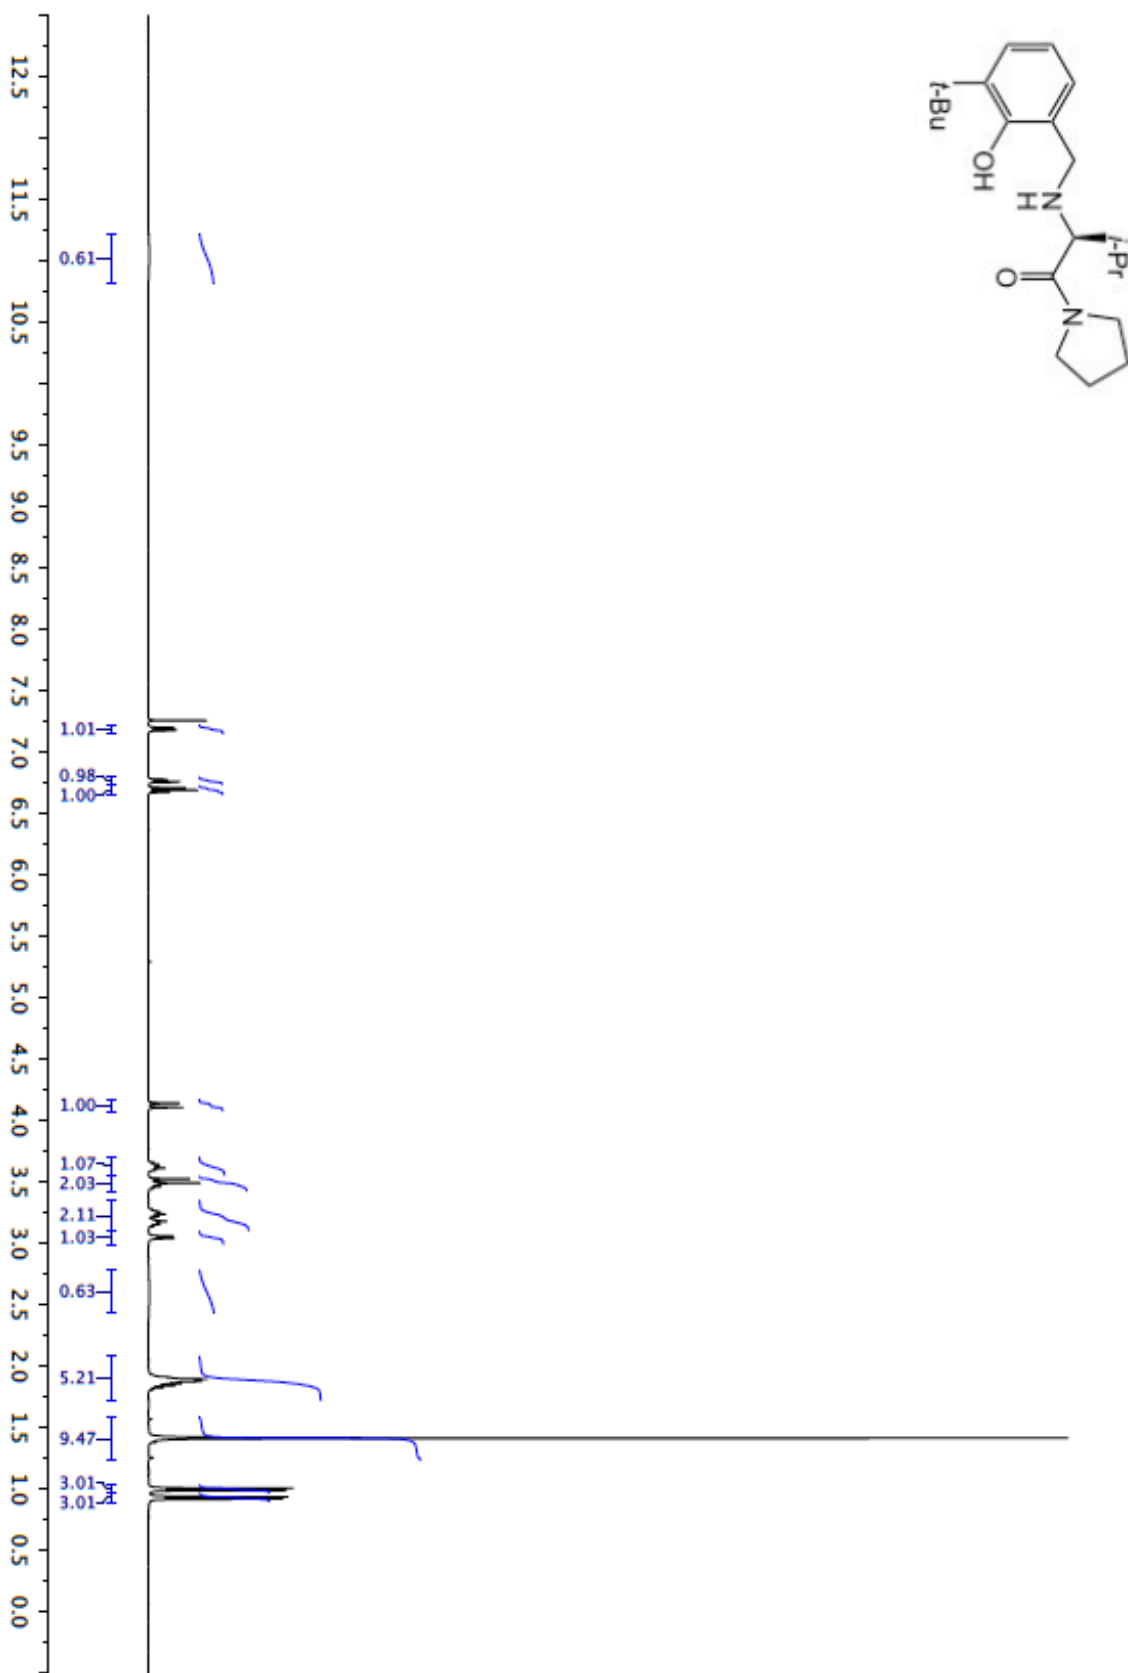

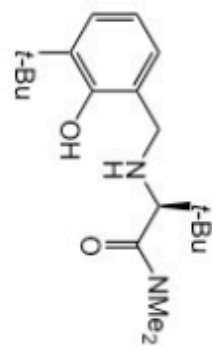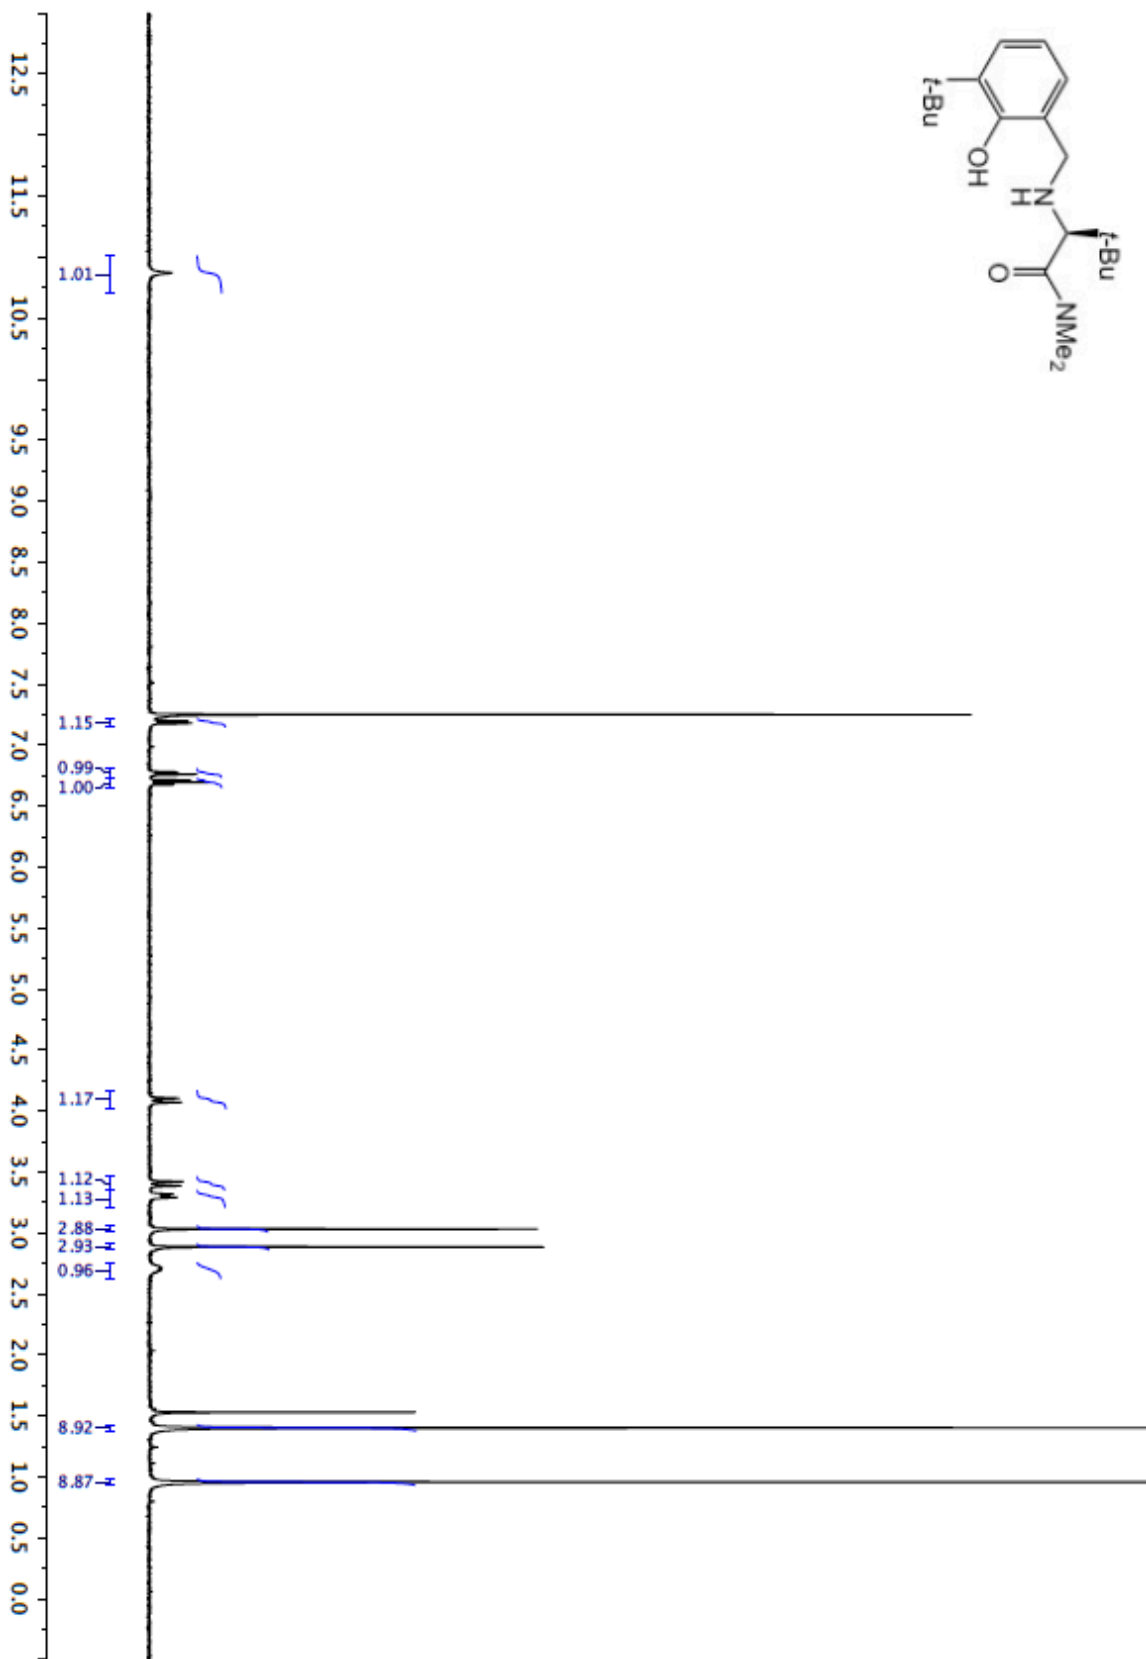

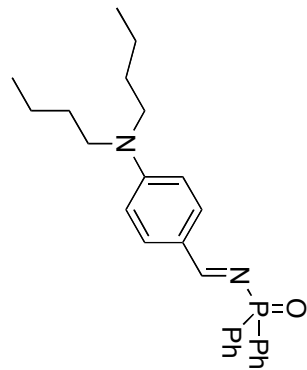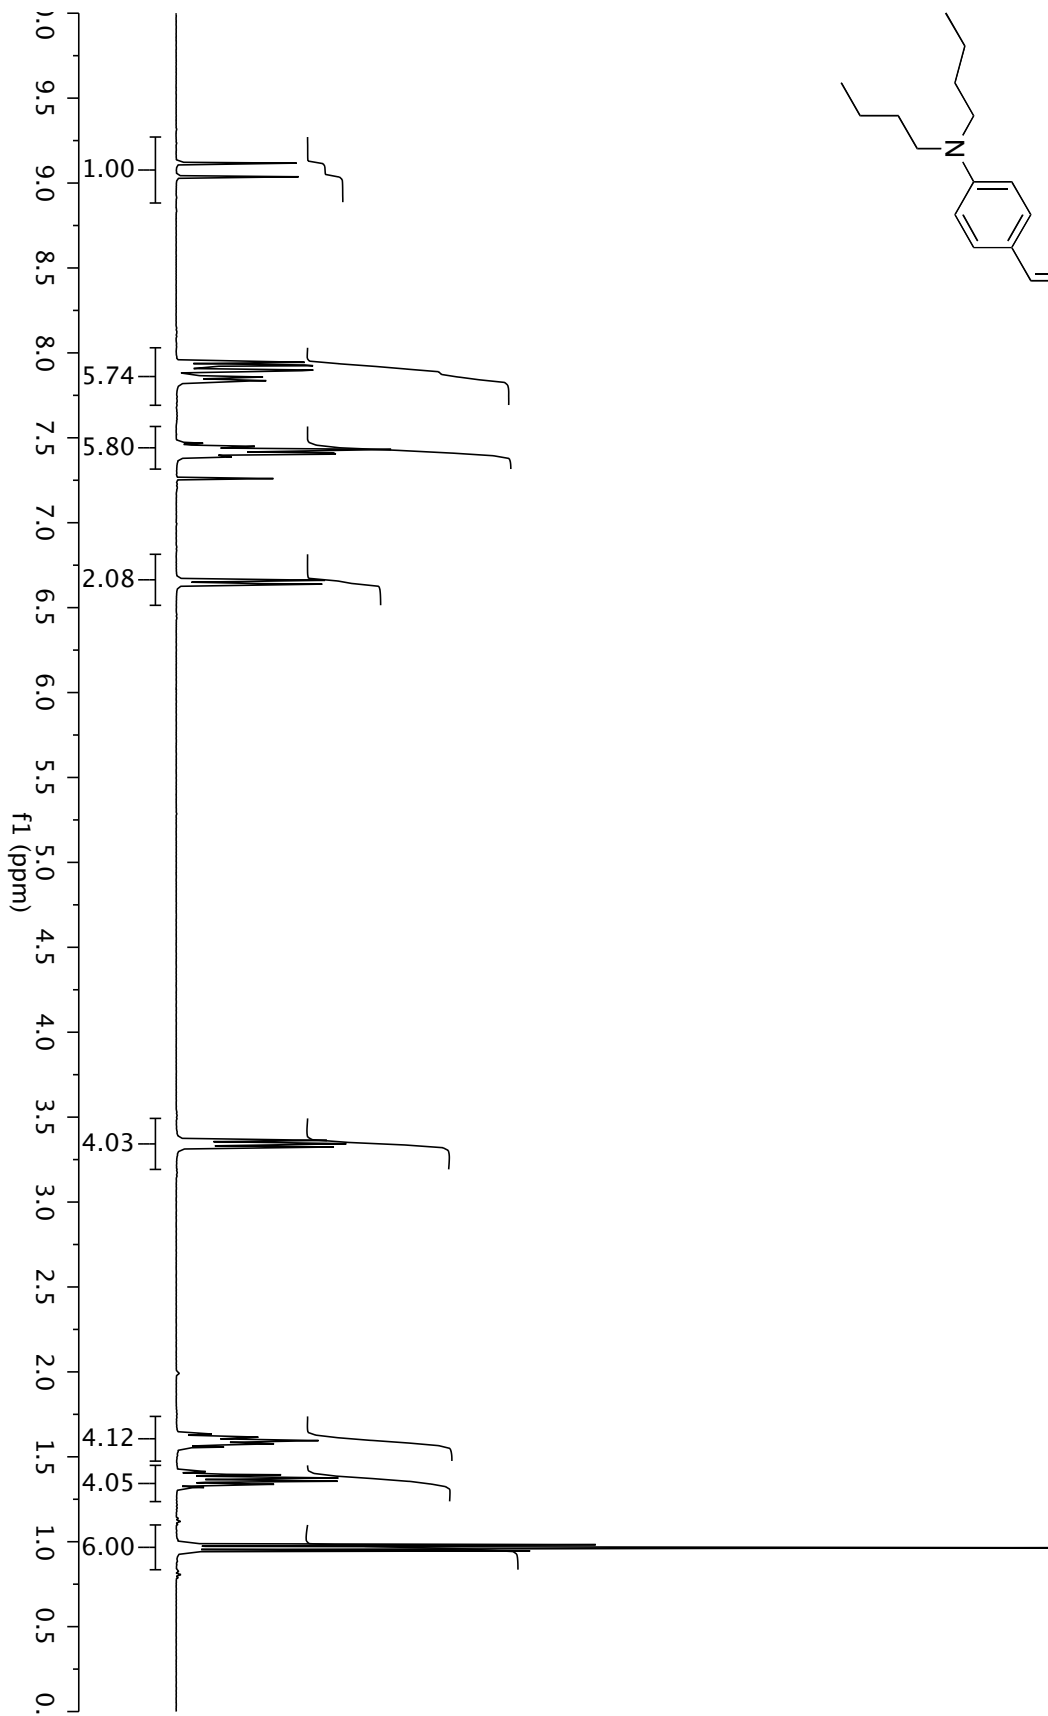



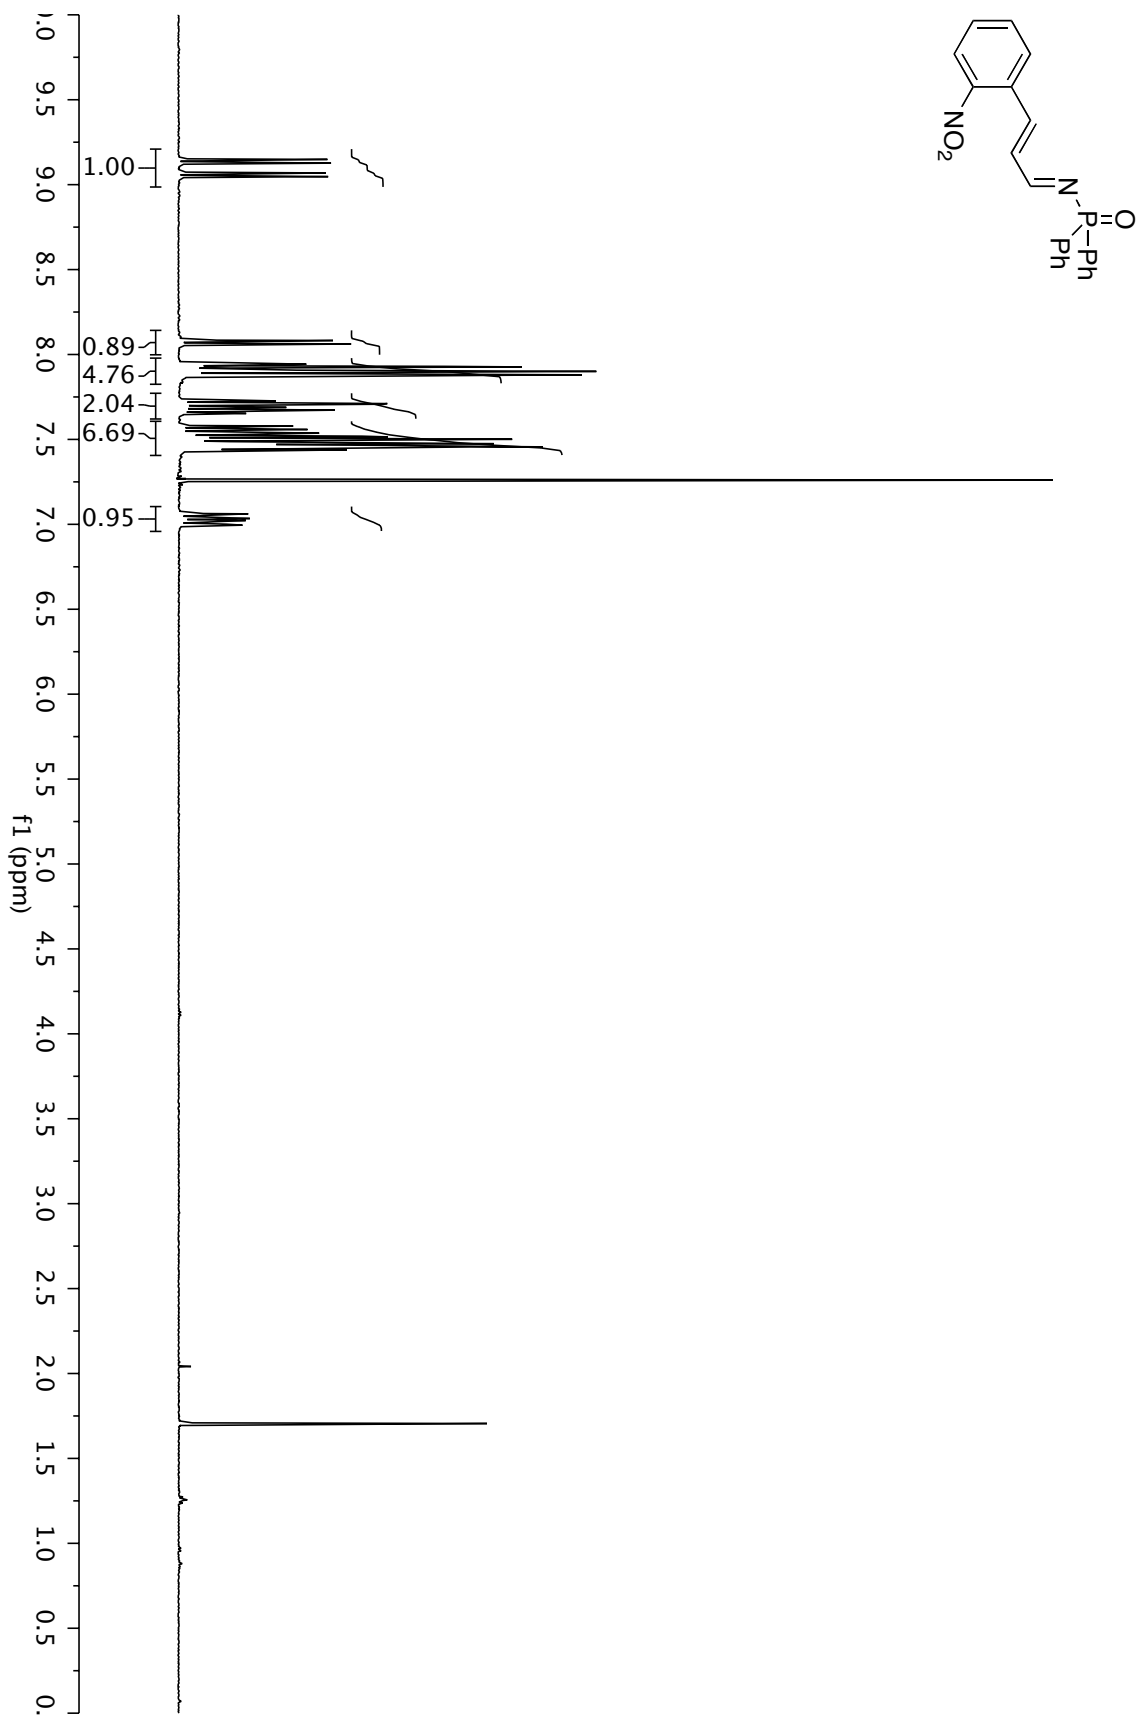

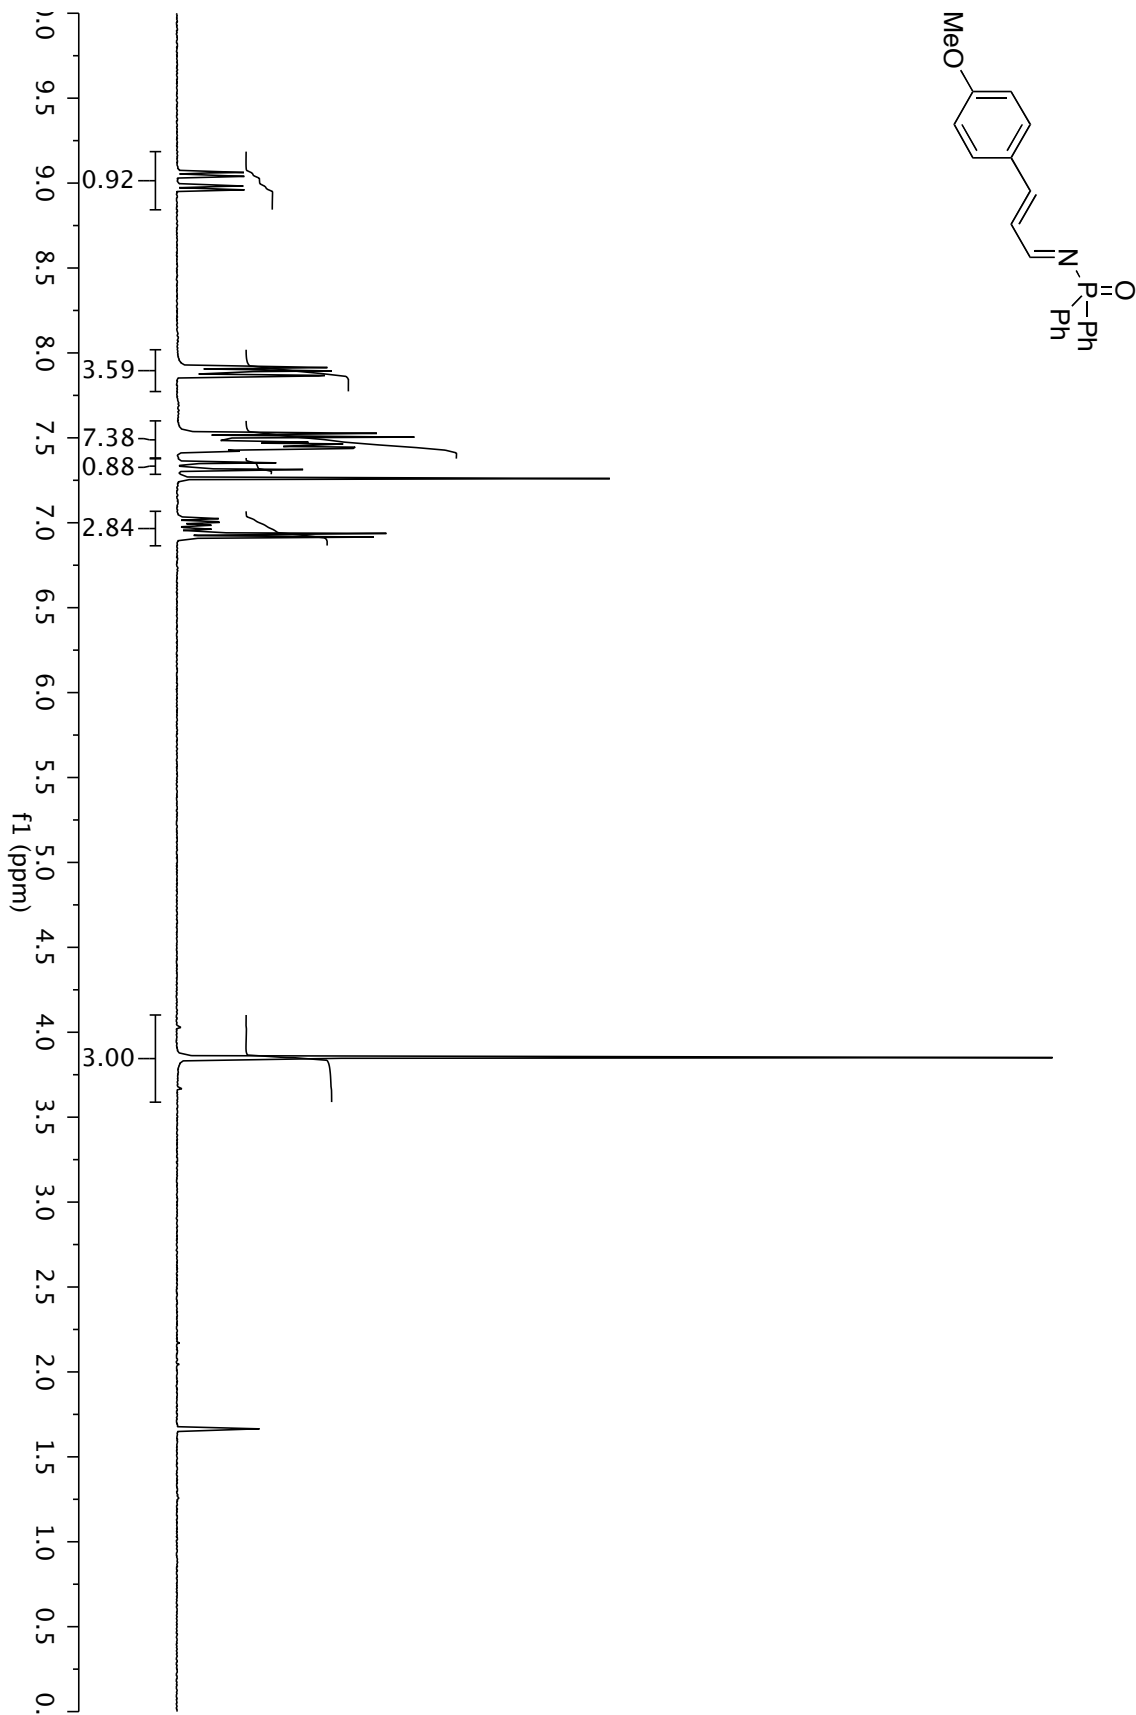

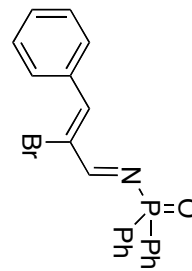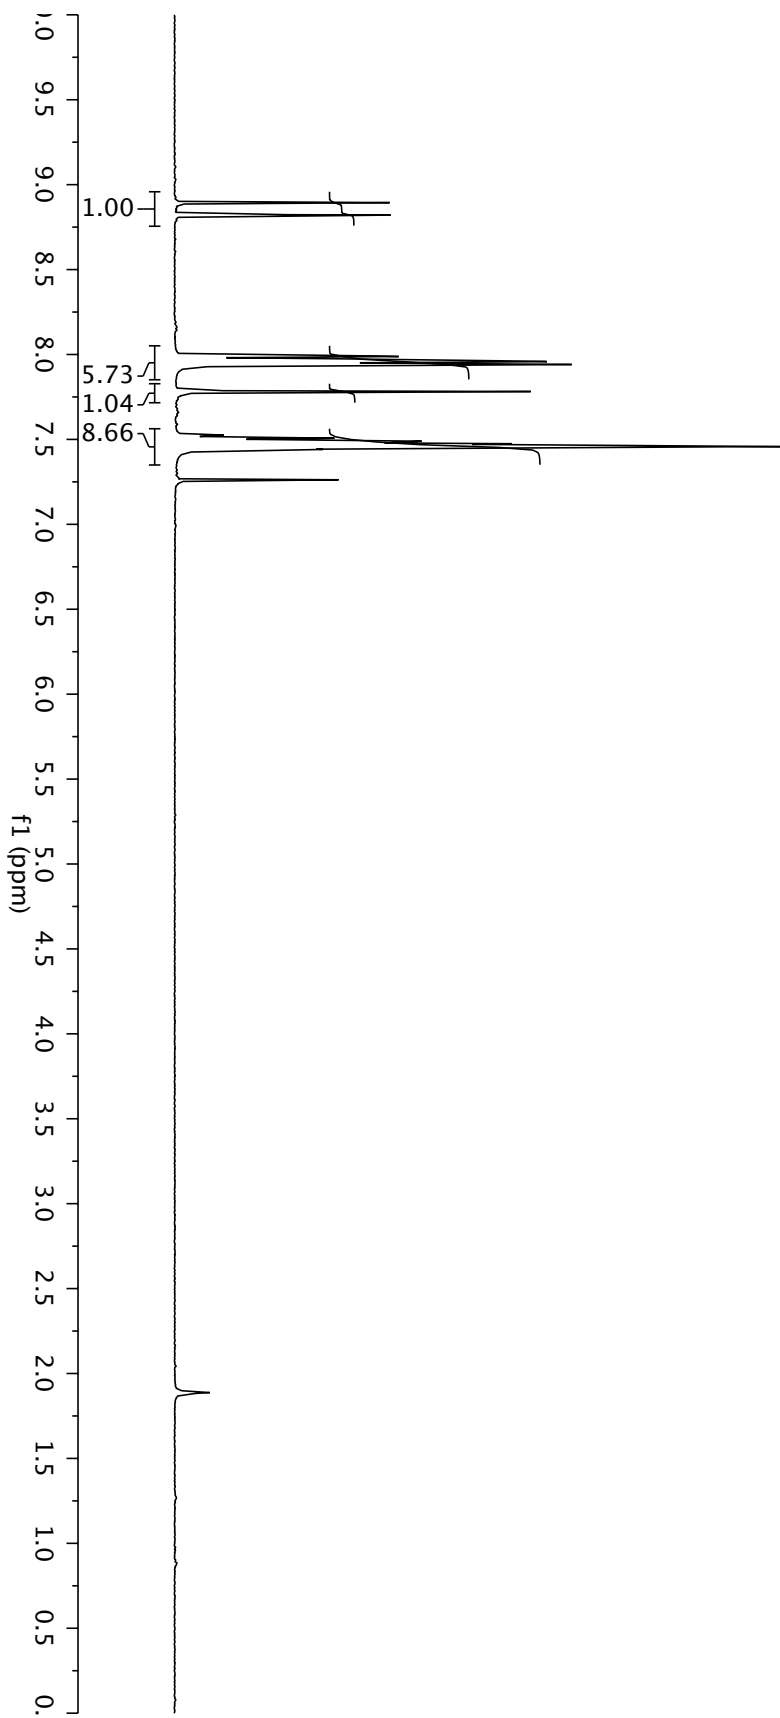

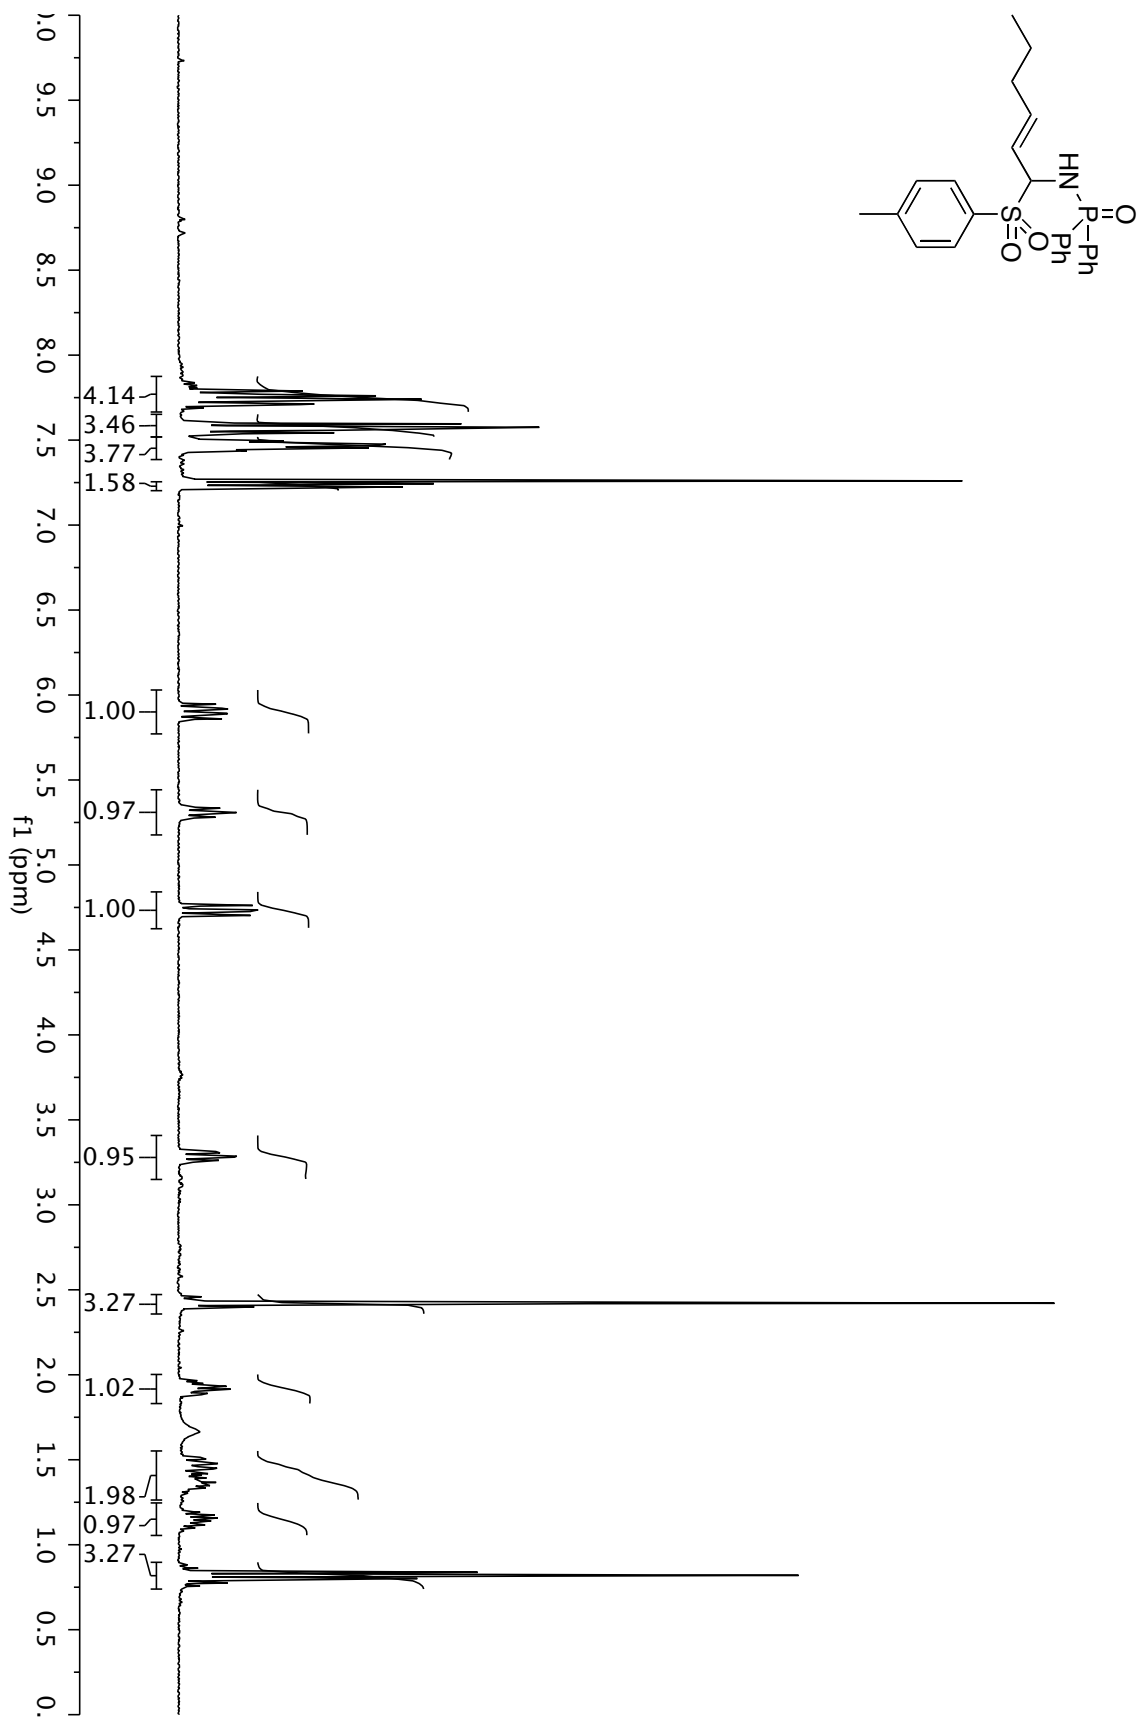

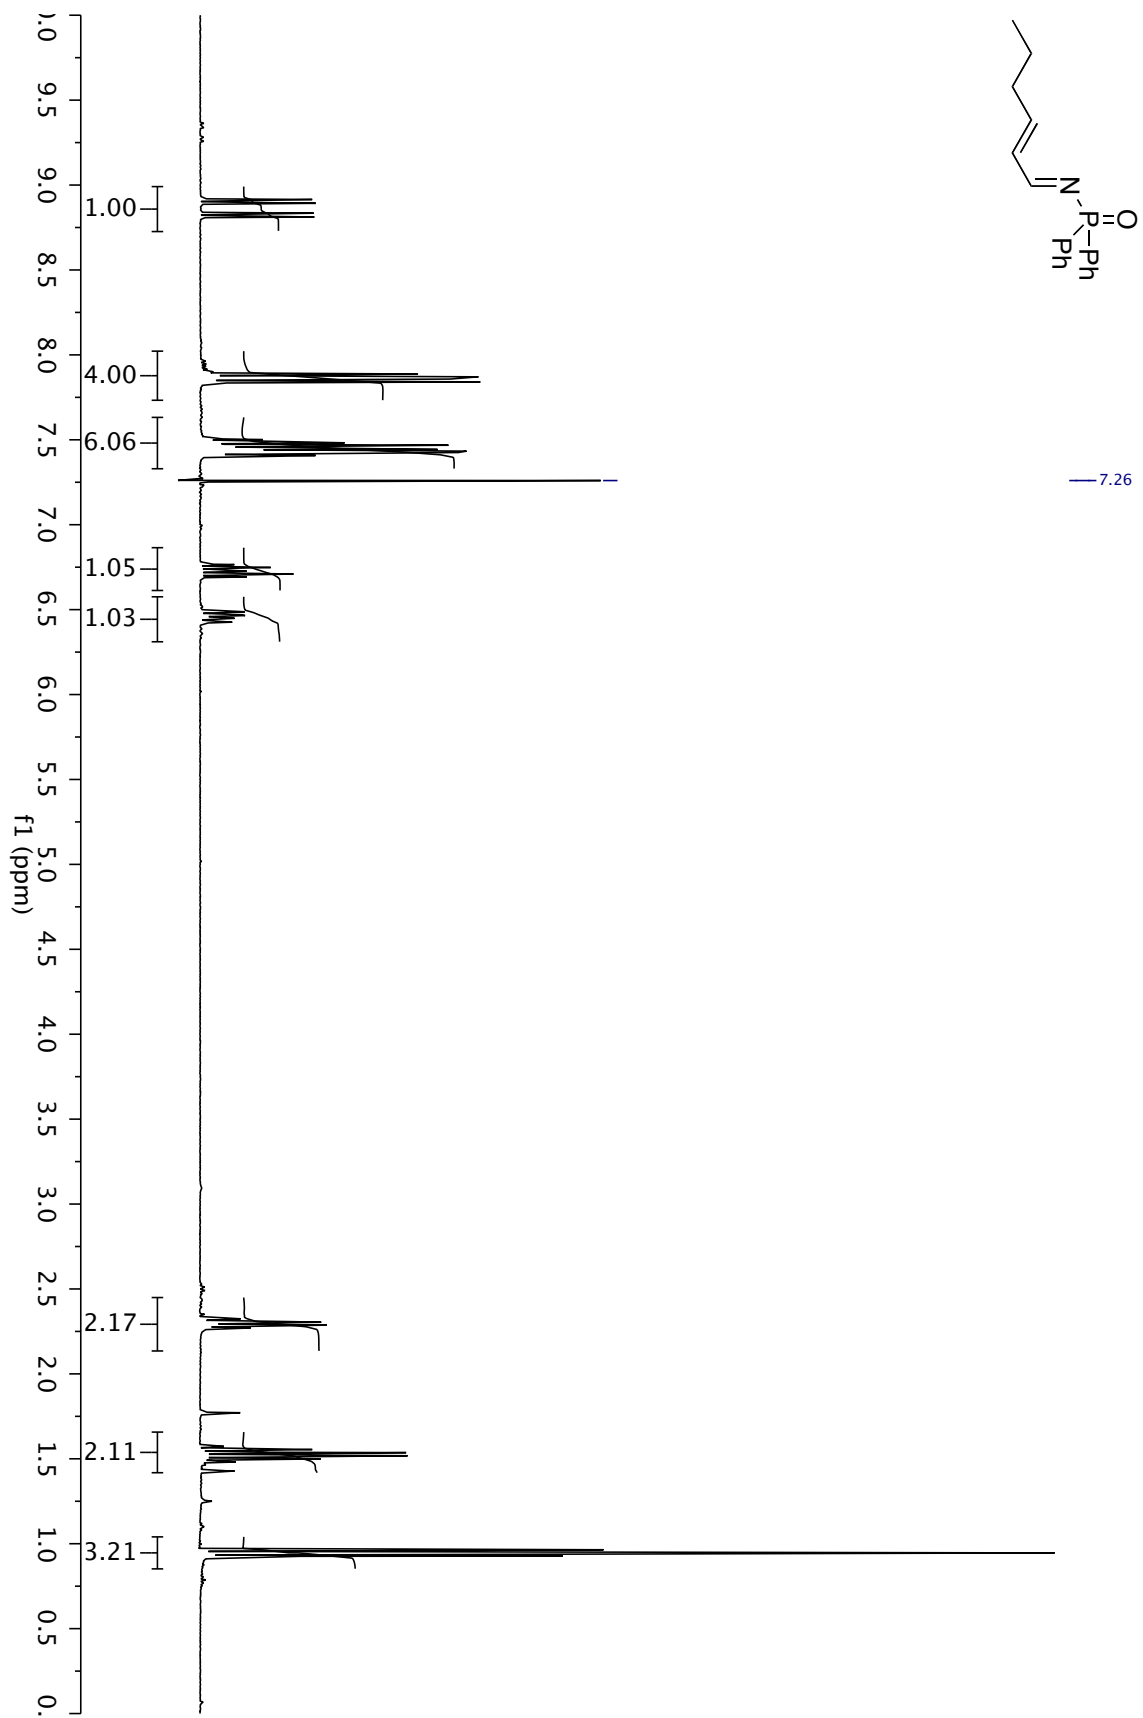

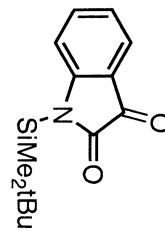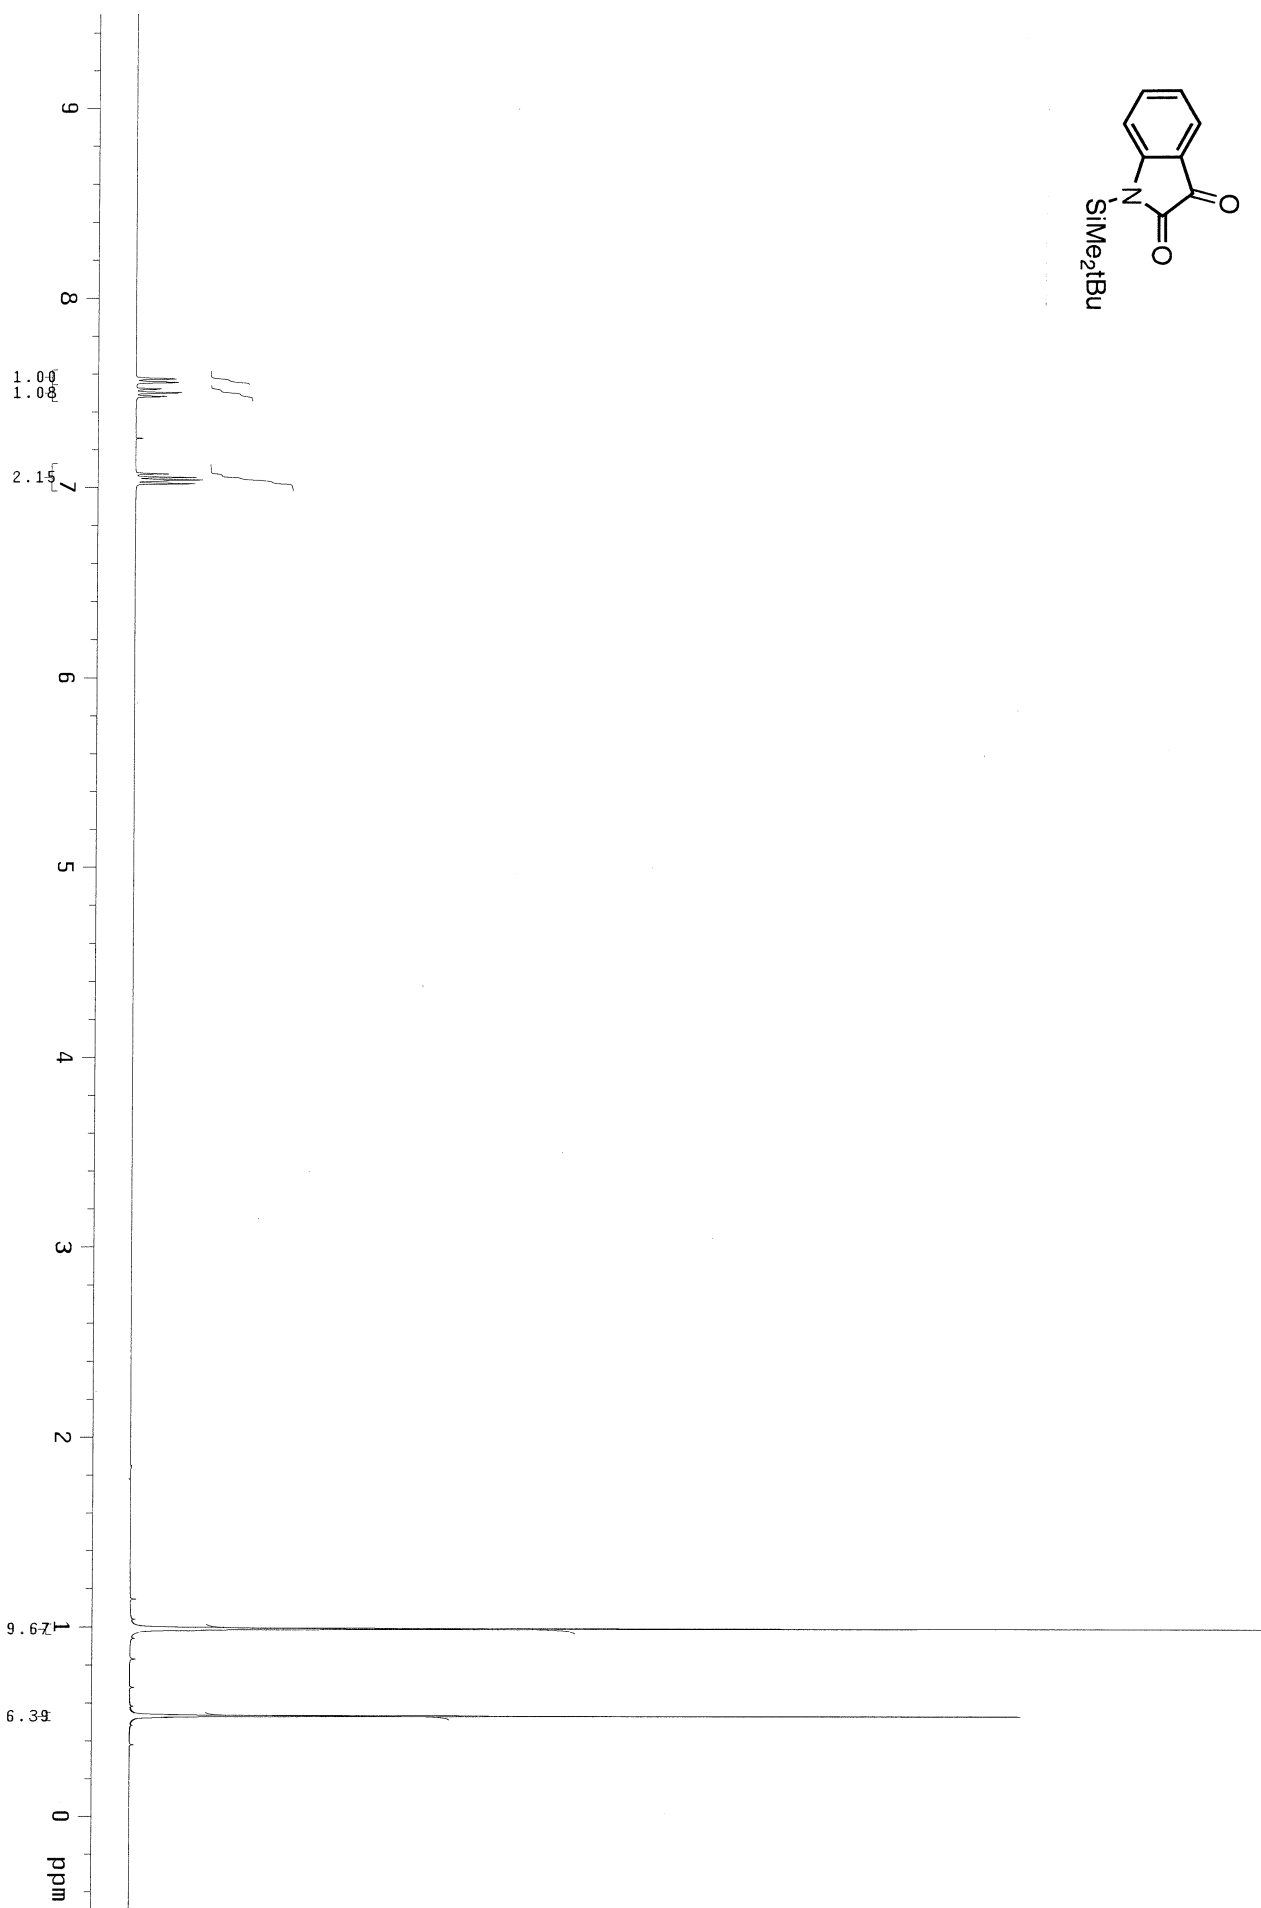

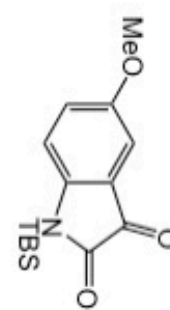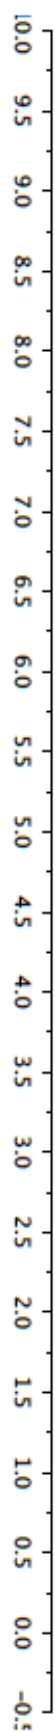

1.85  
0.96

3.00

9.12

5.91

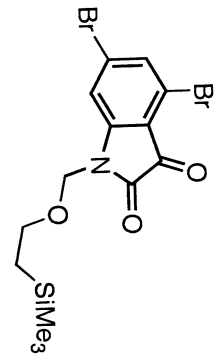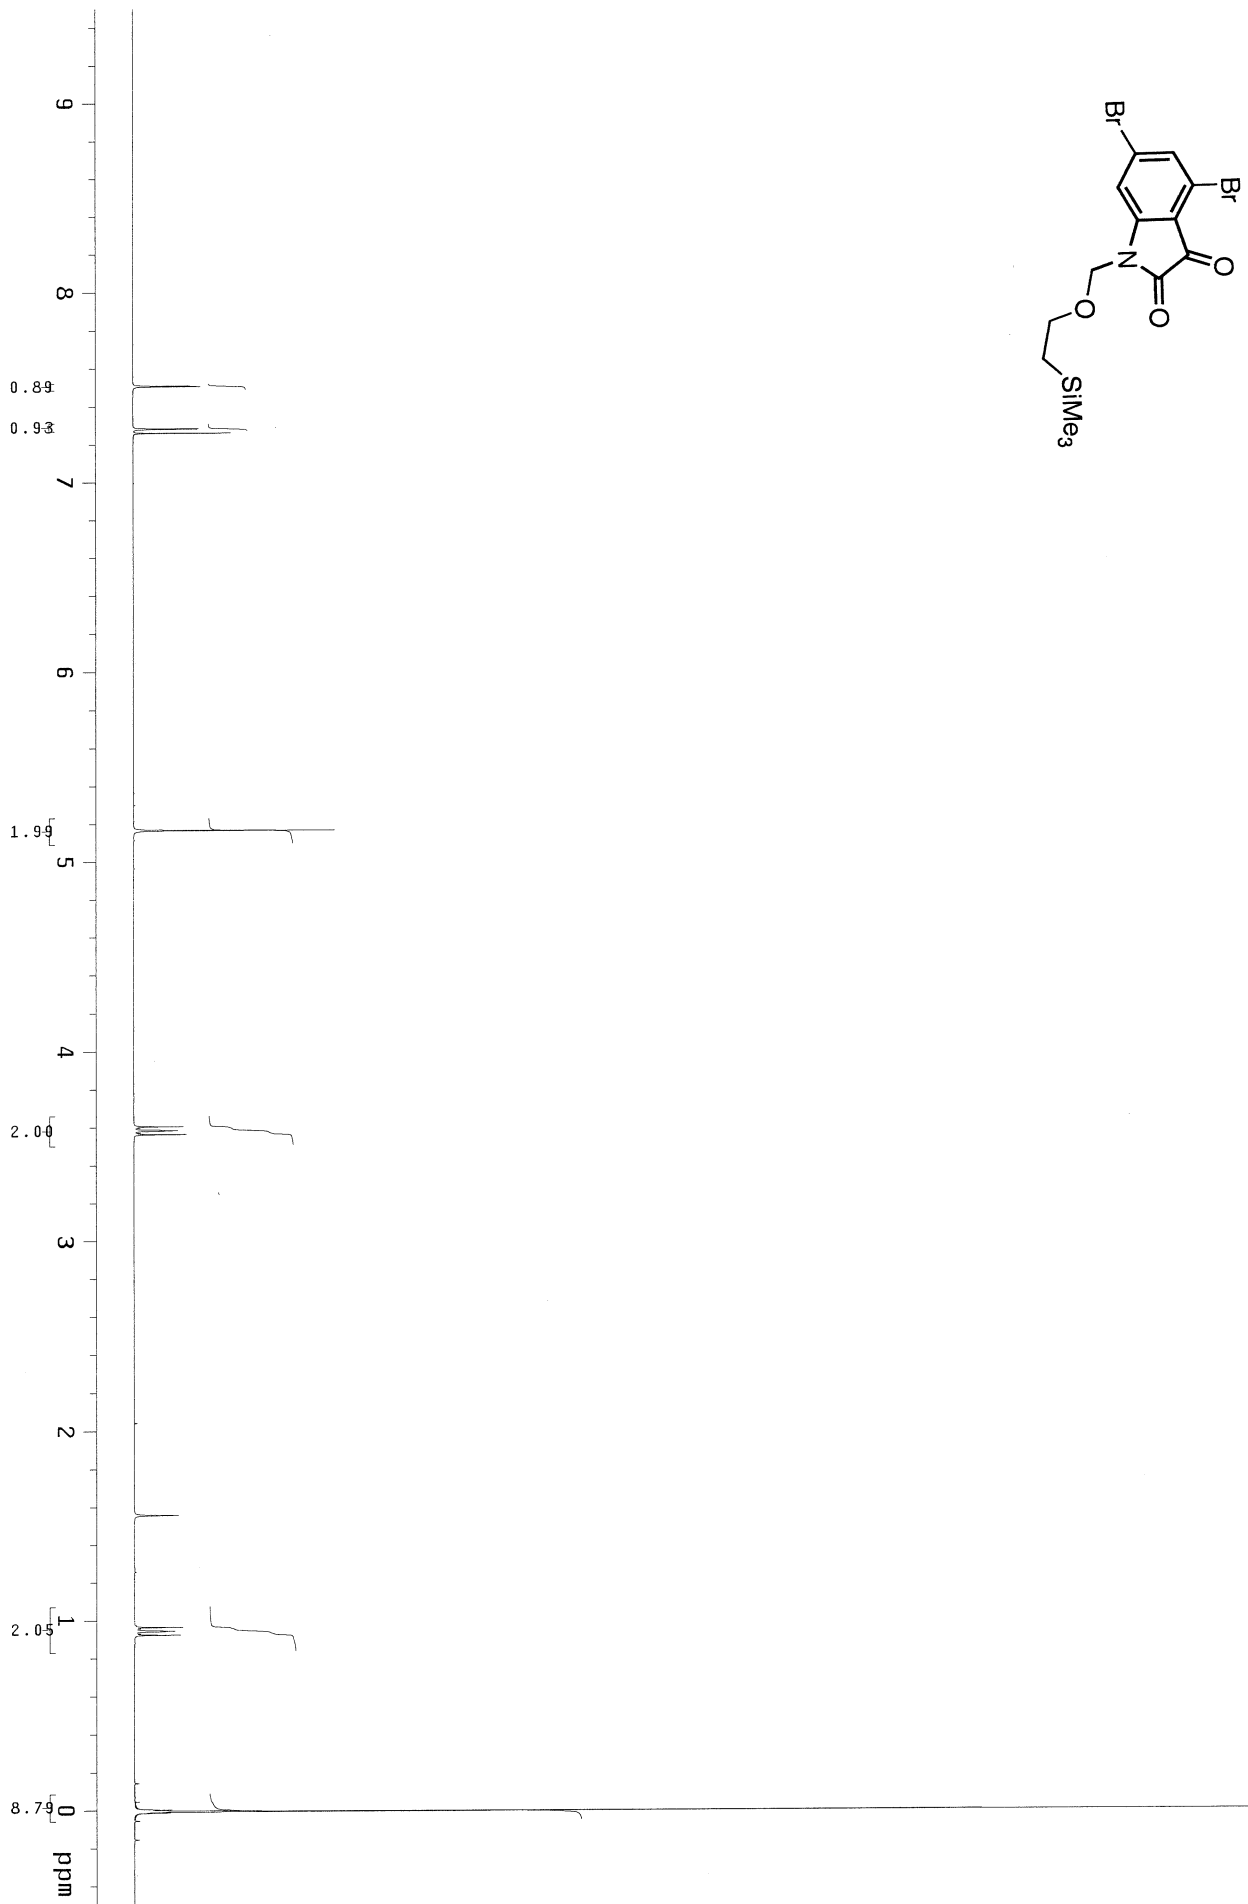



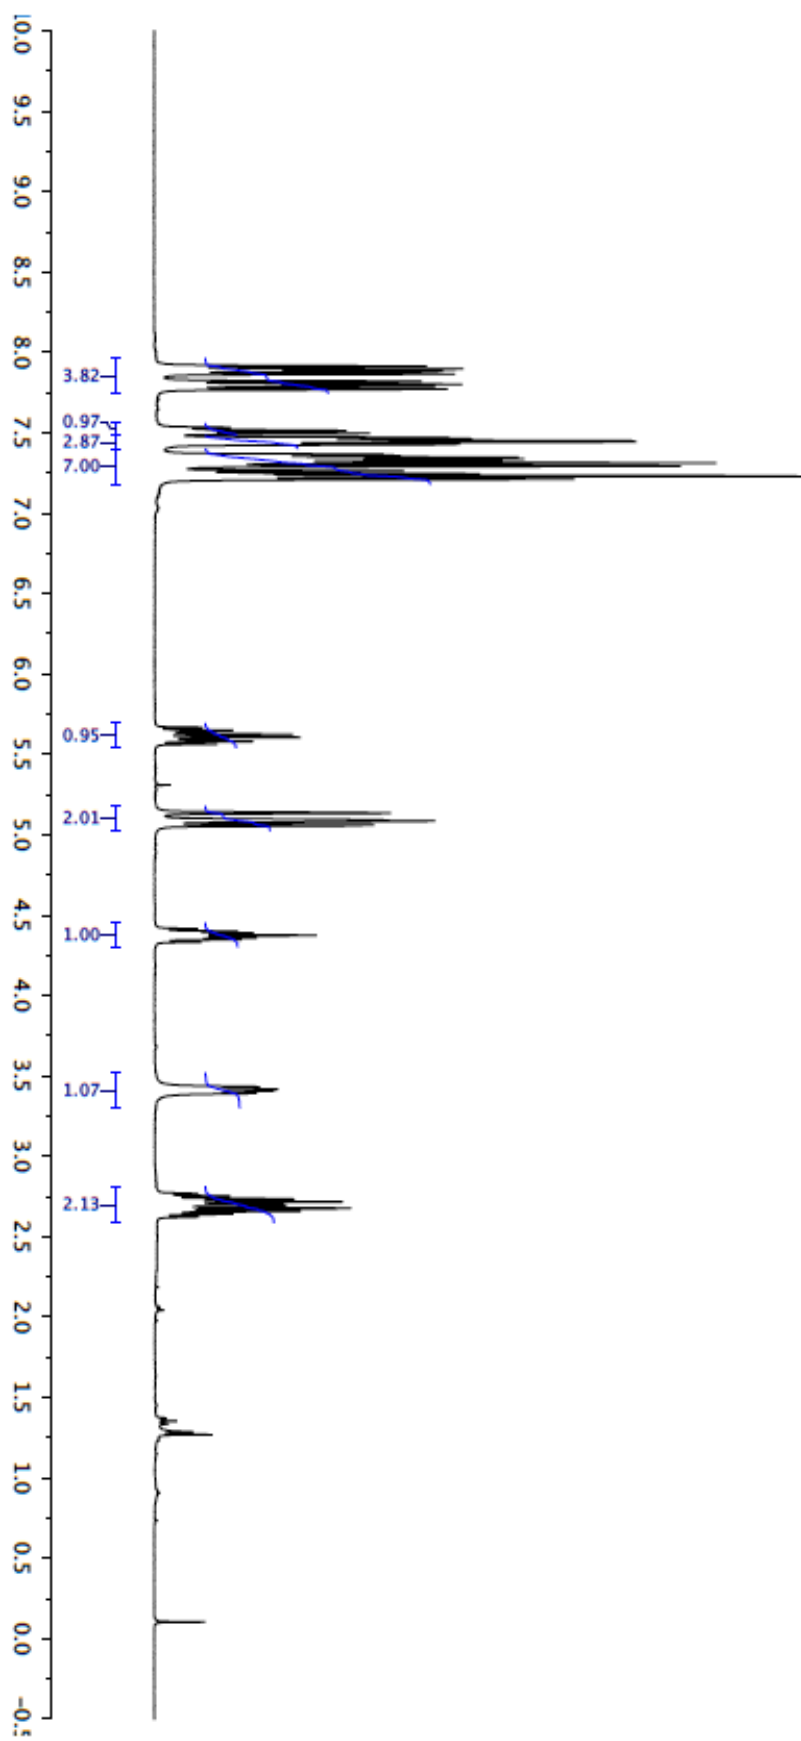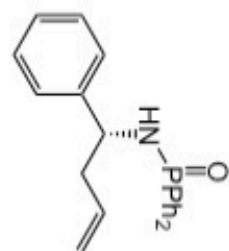

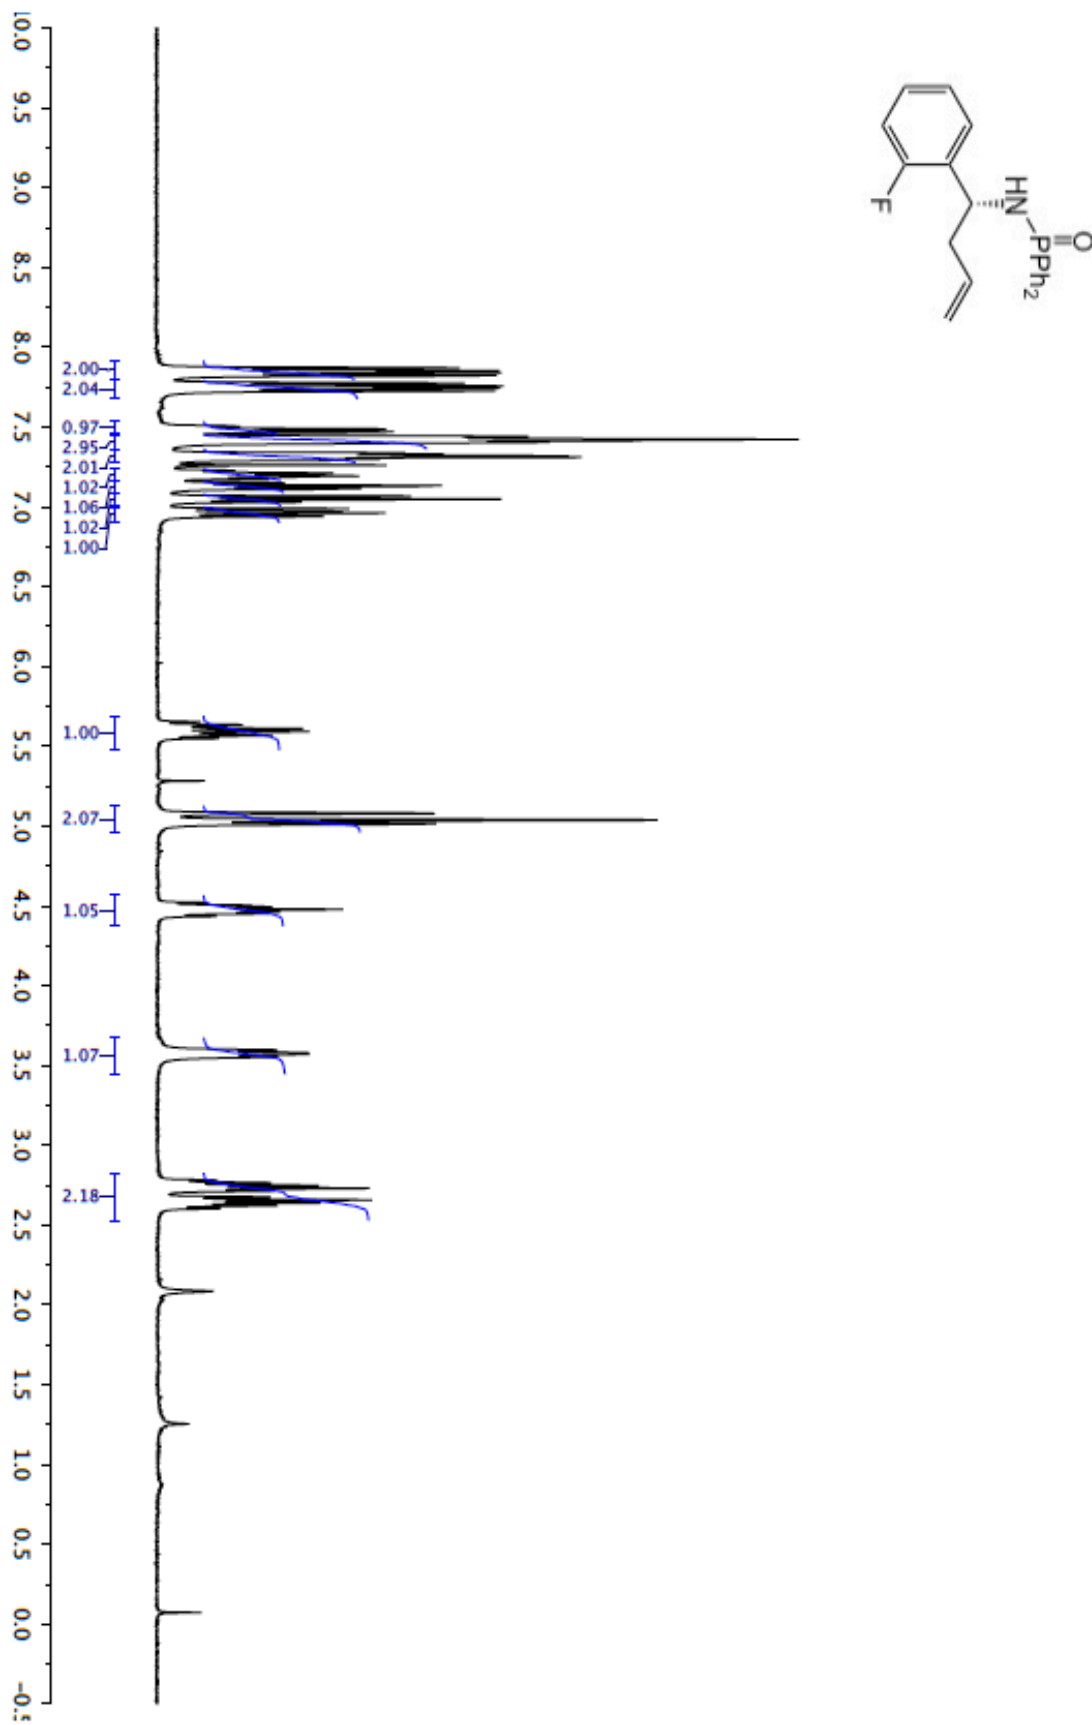

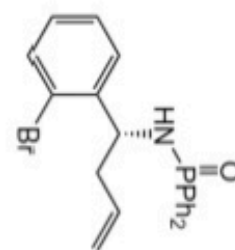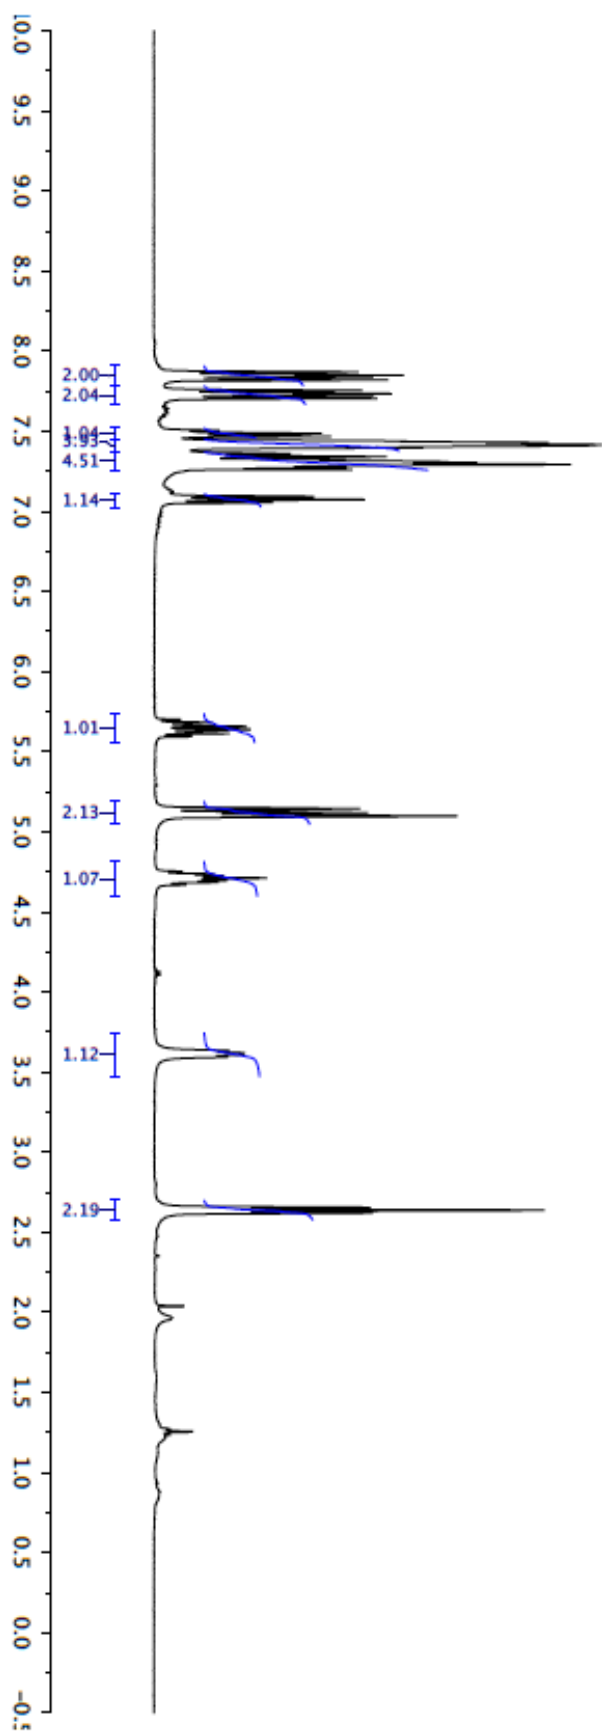

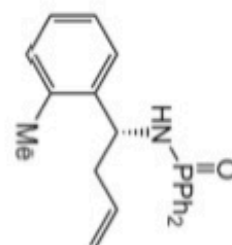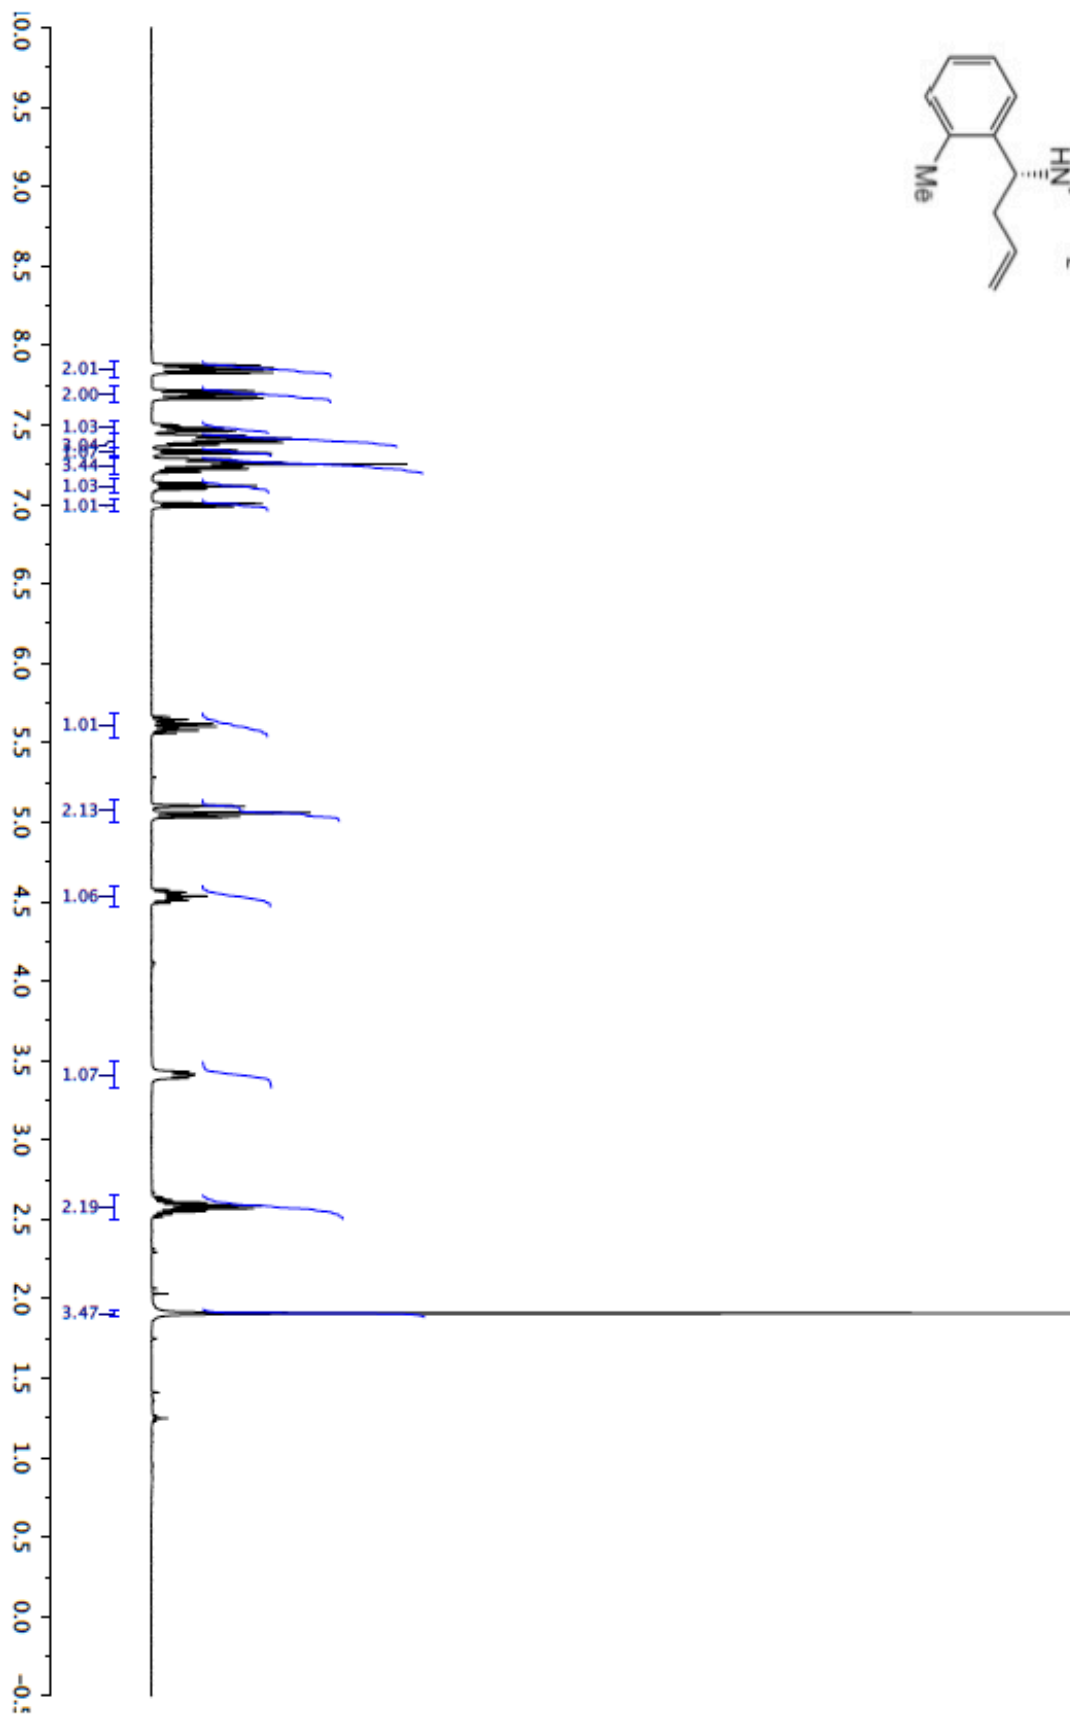

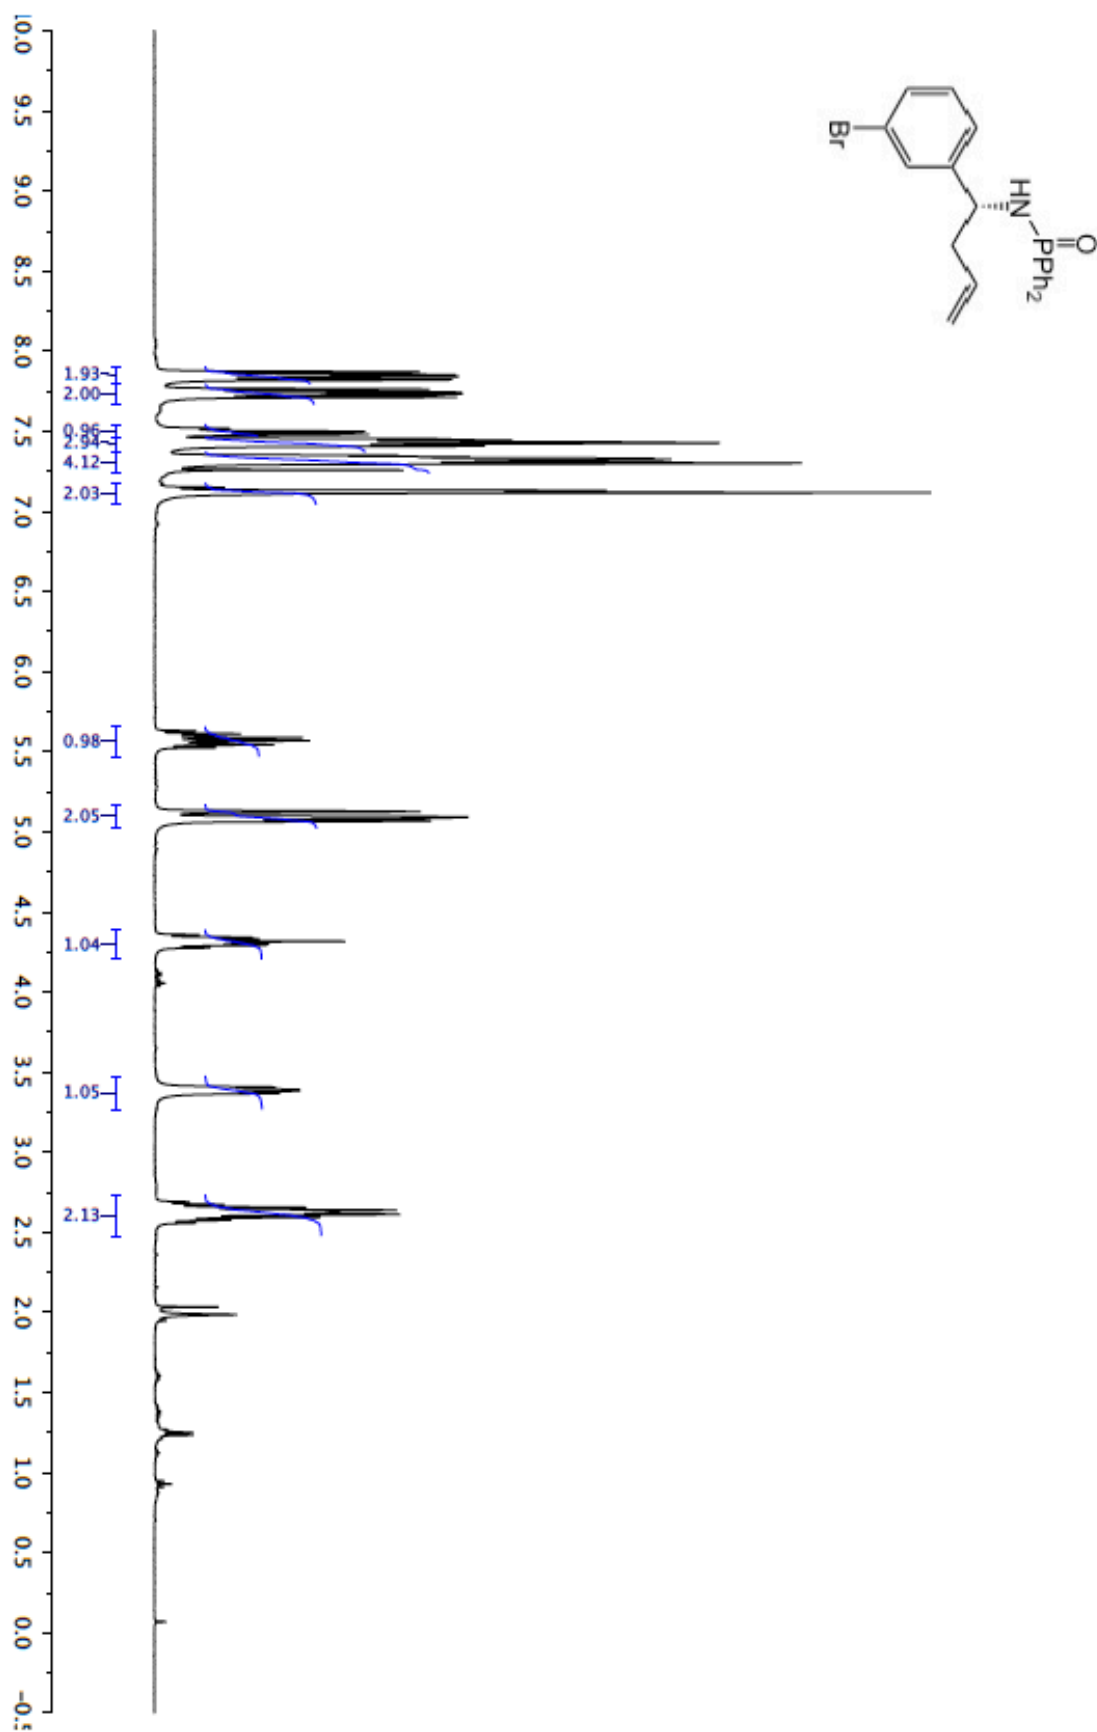

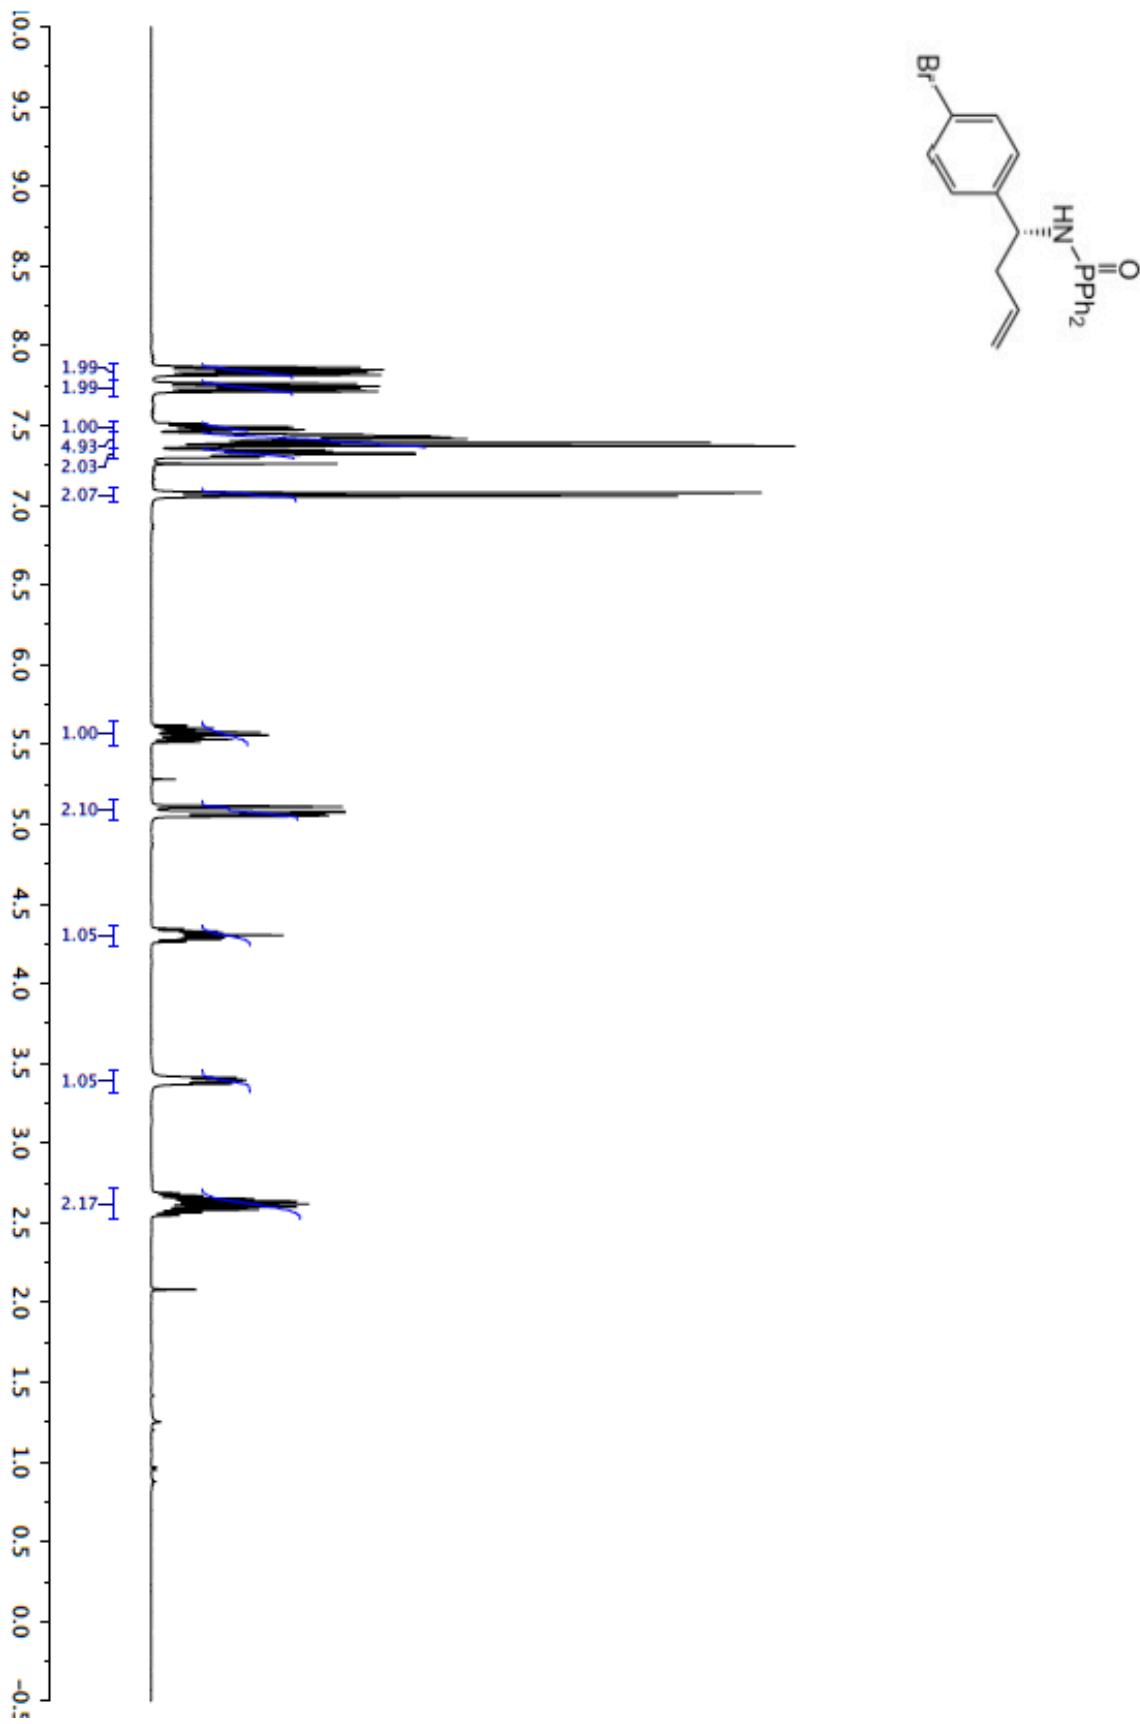

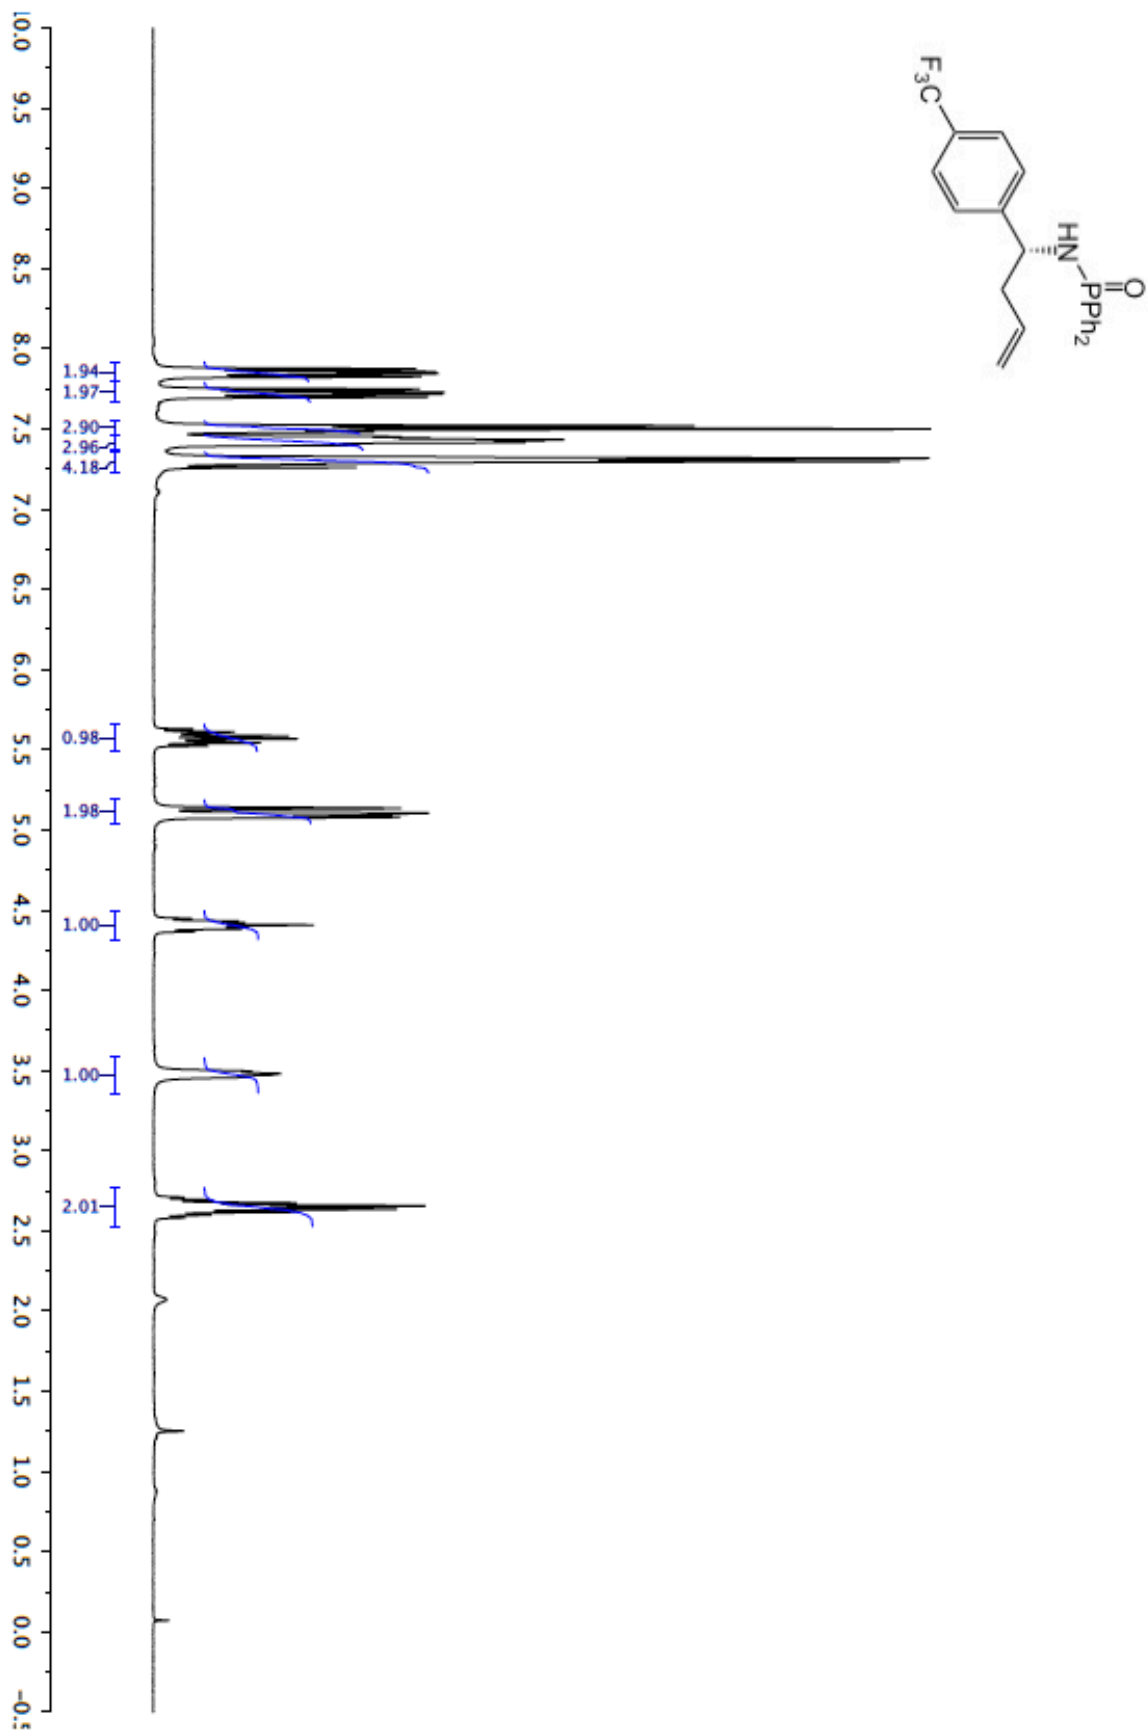

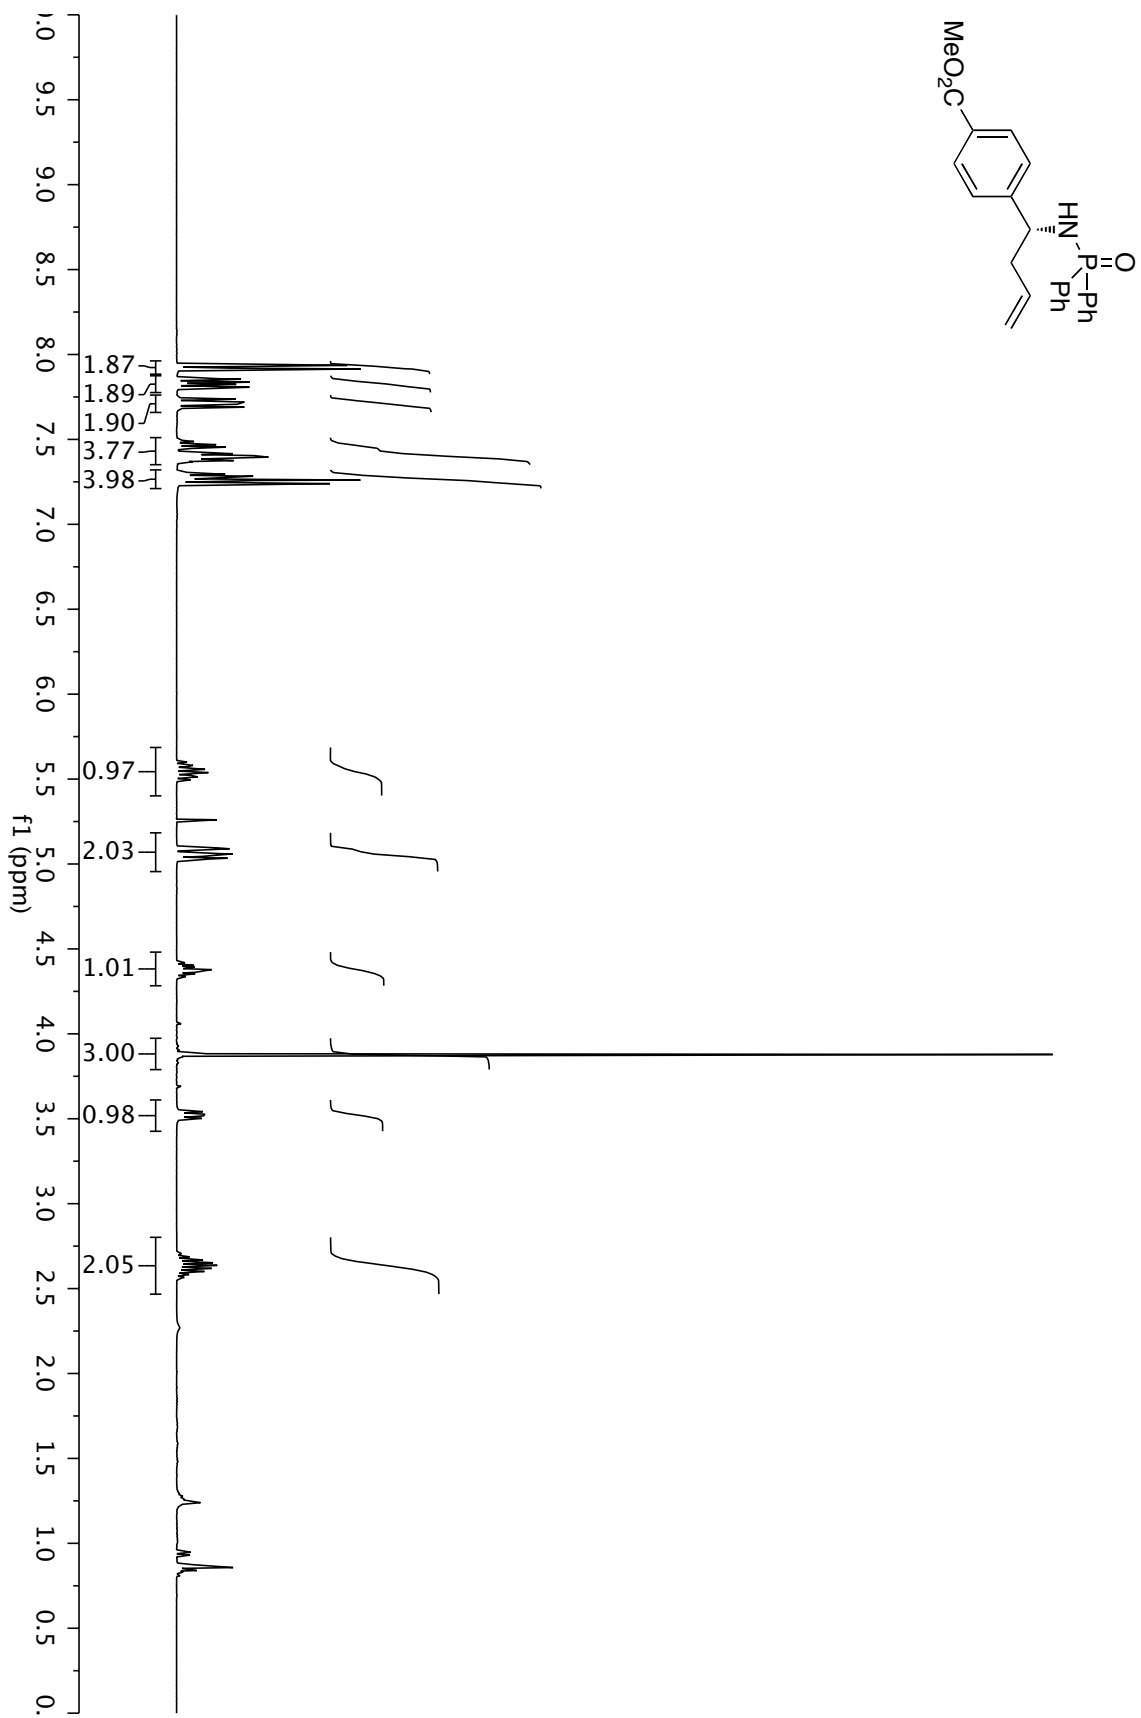



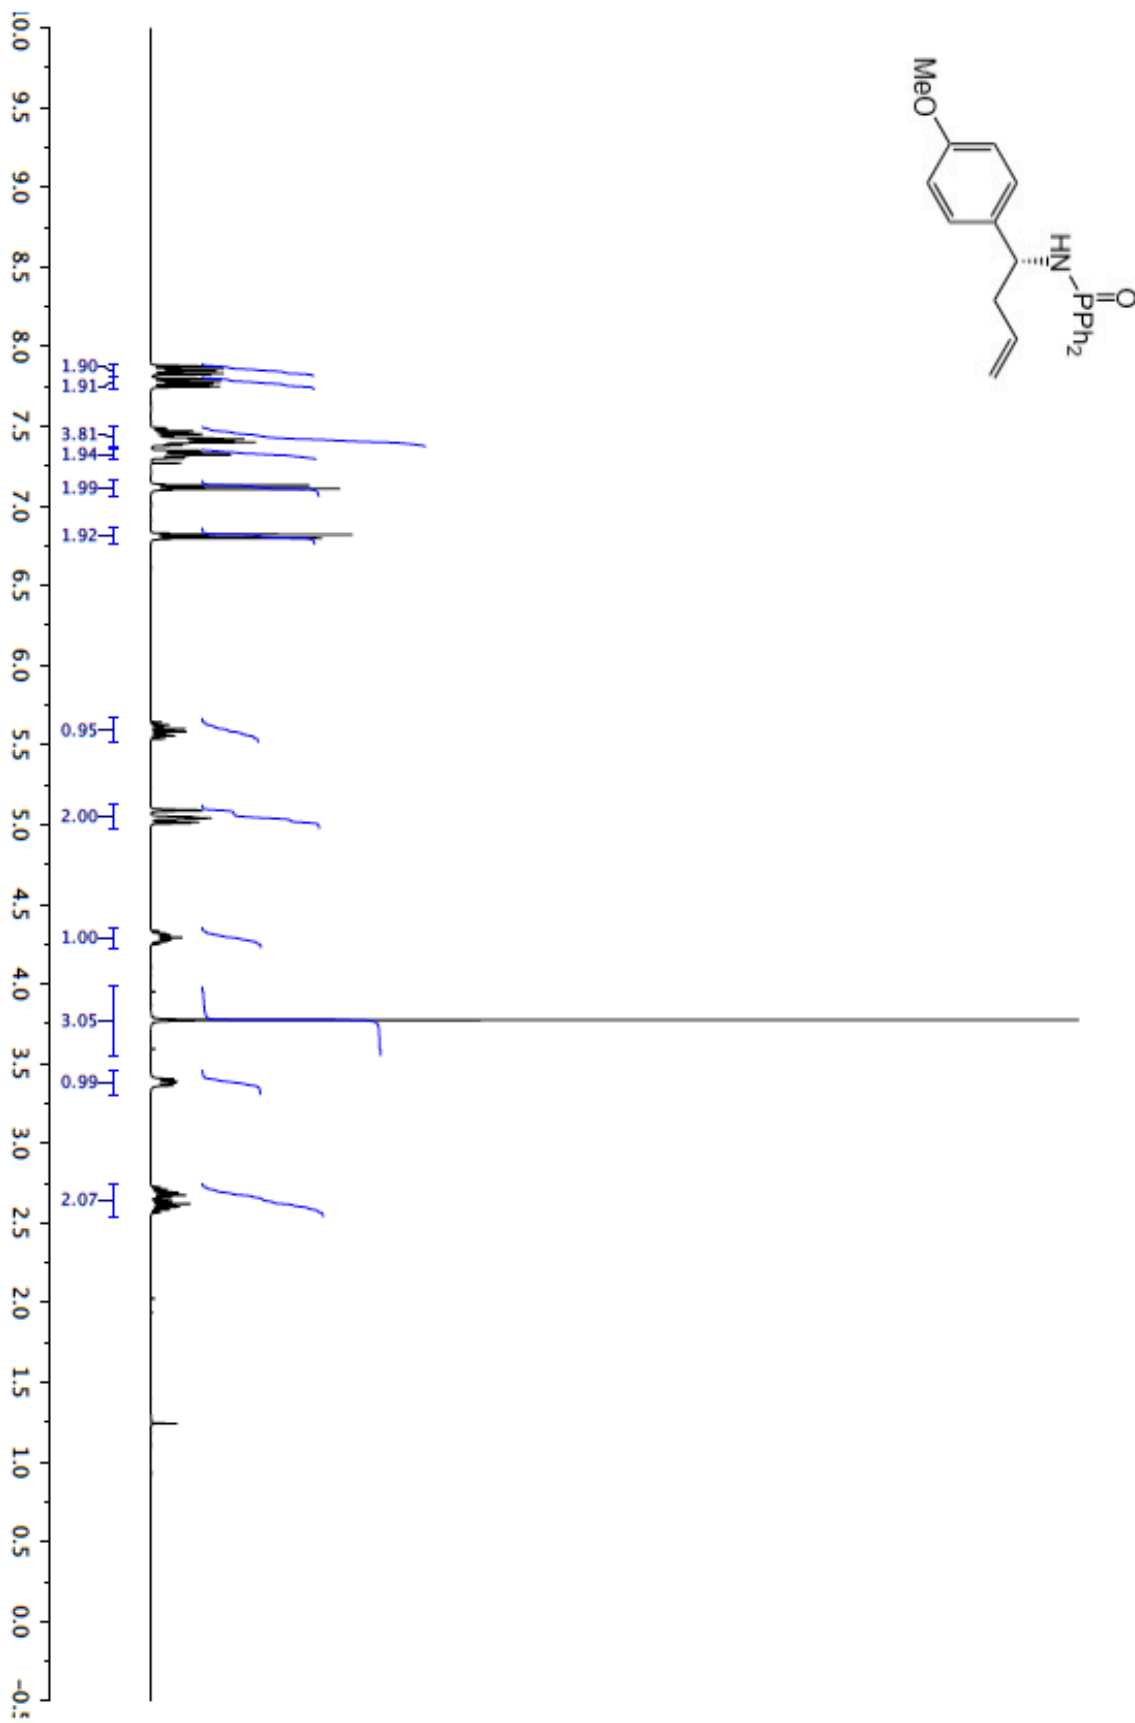

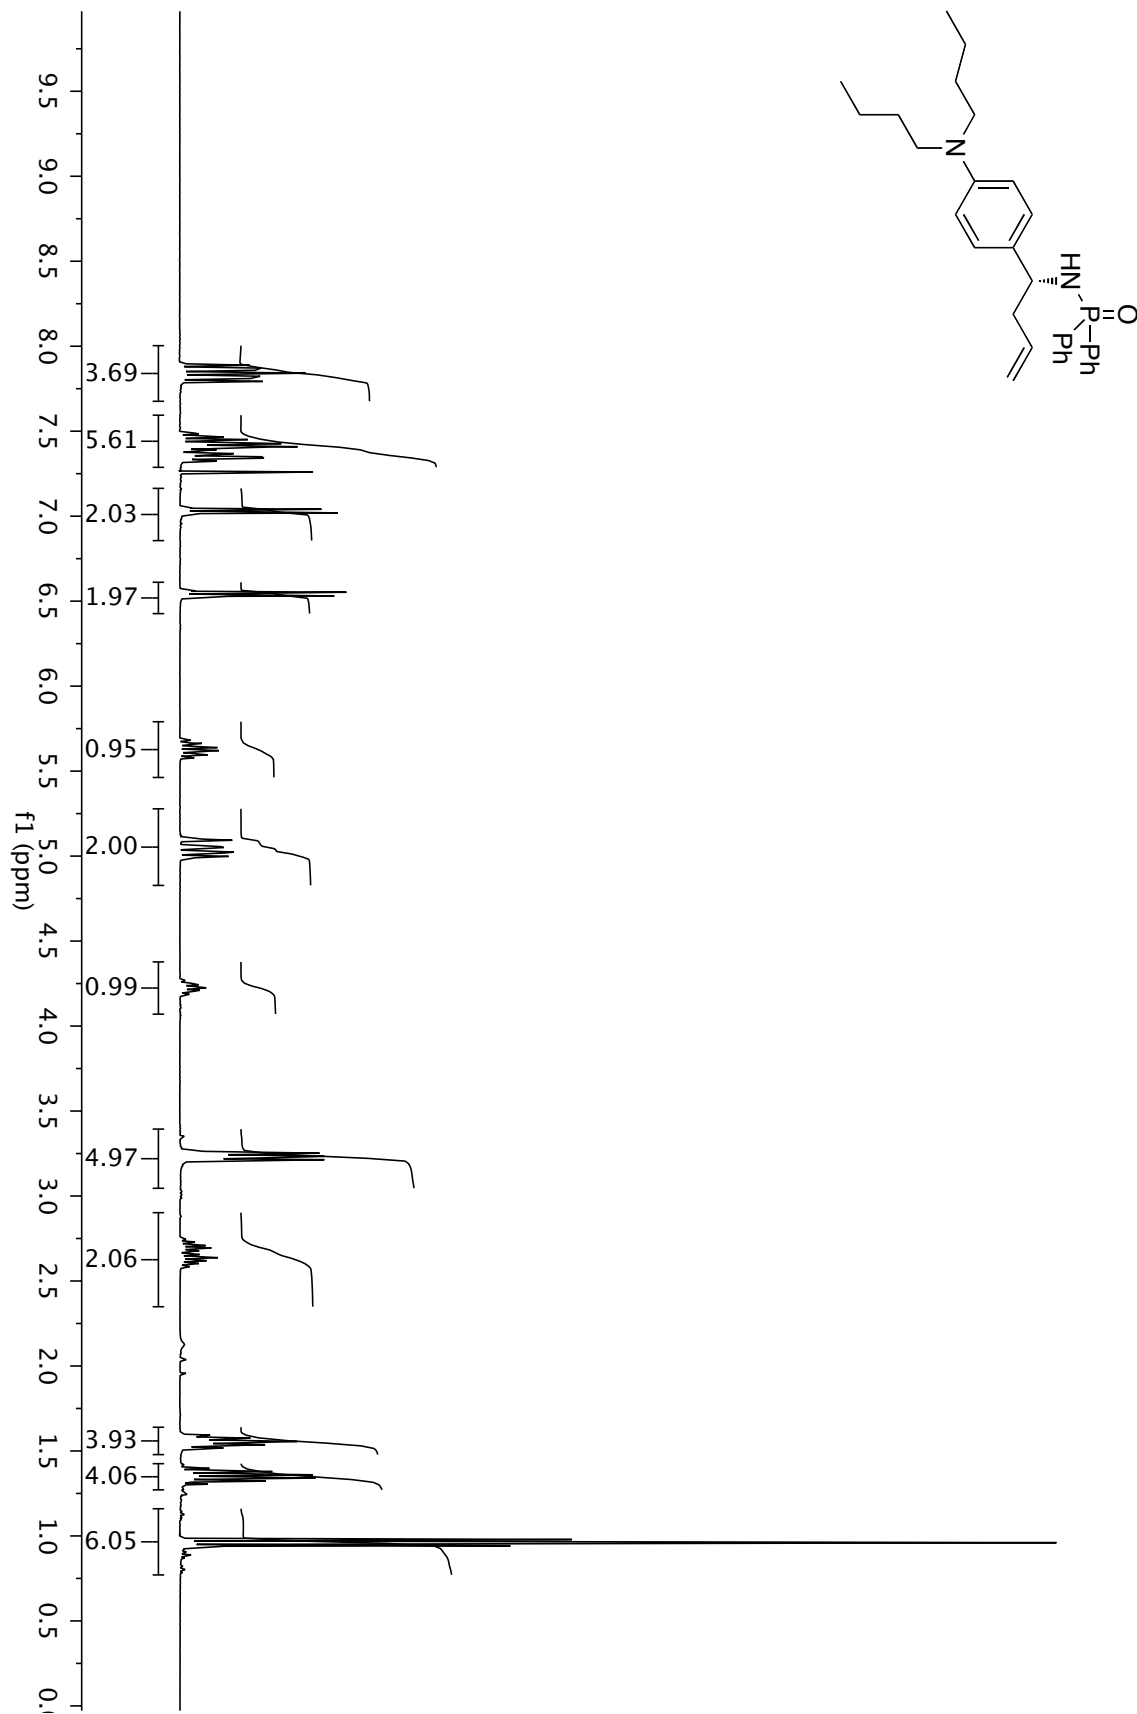

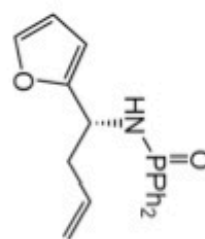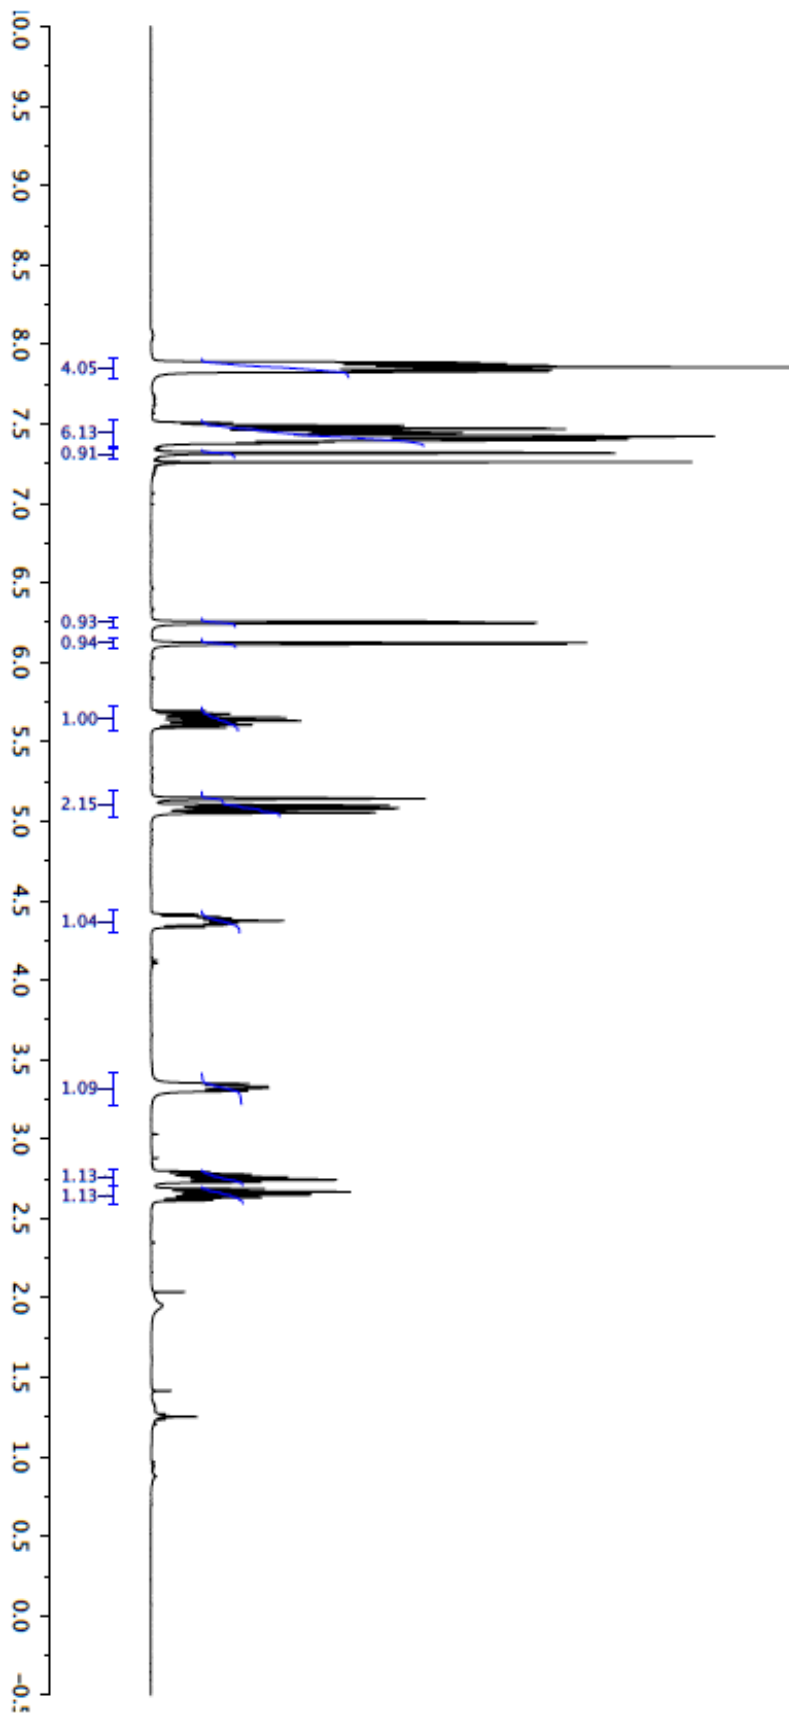

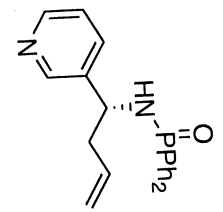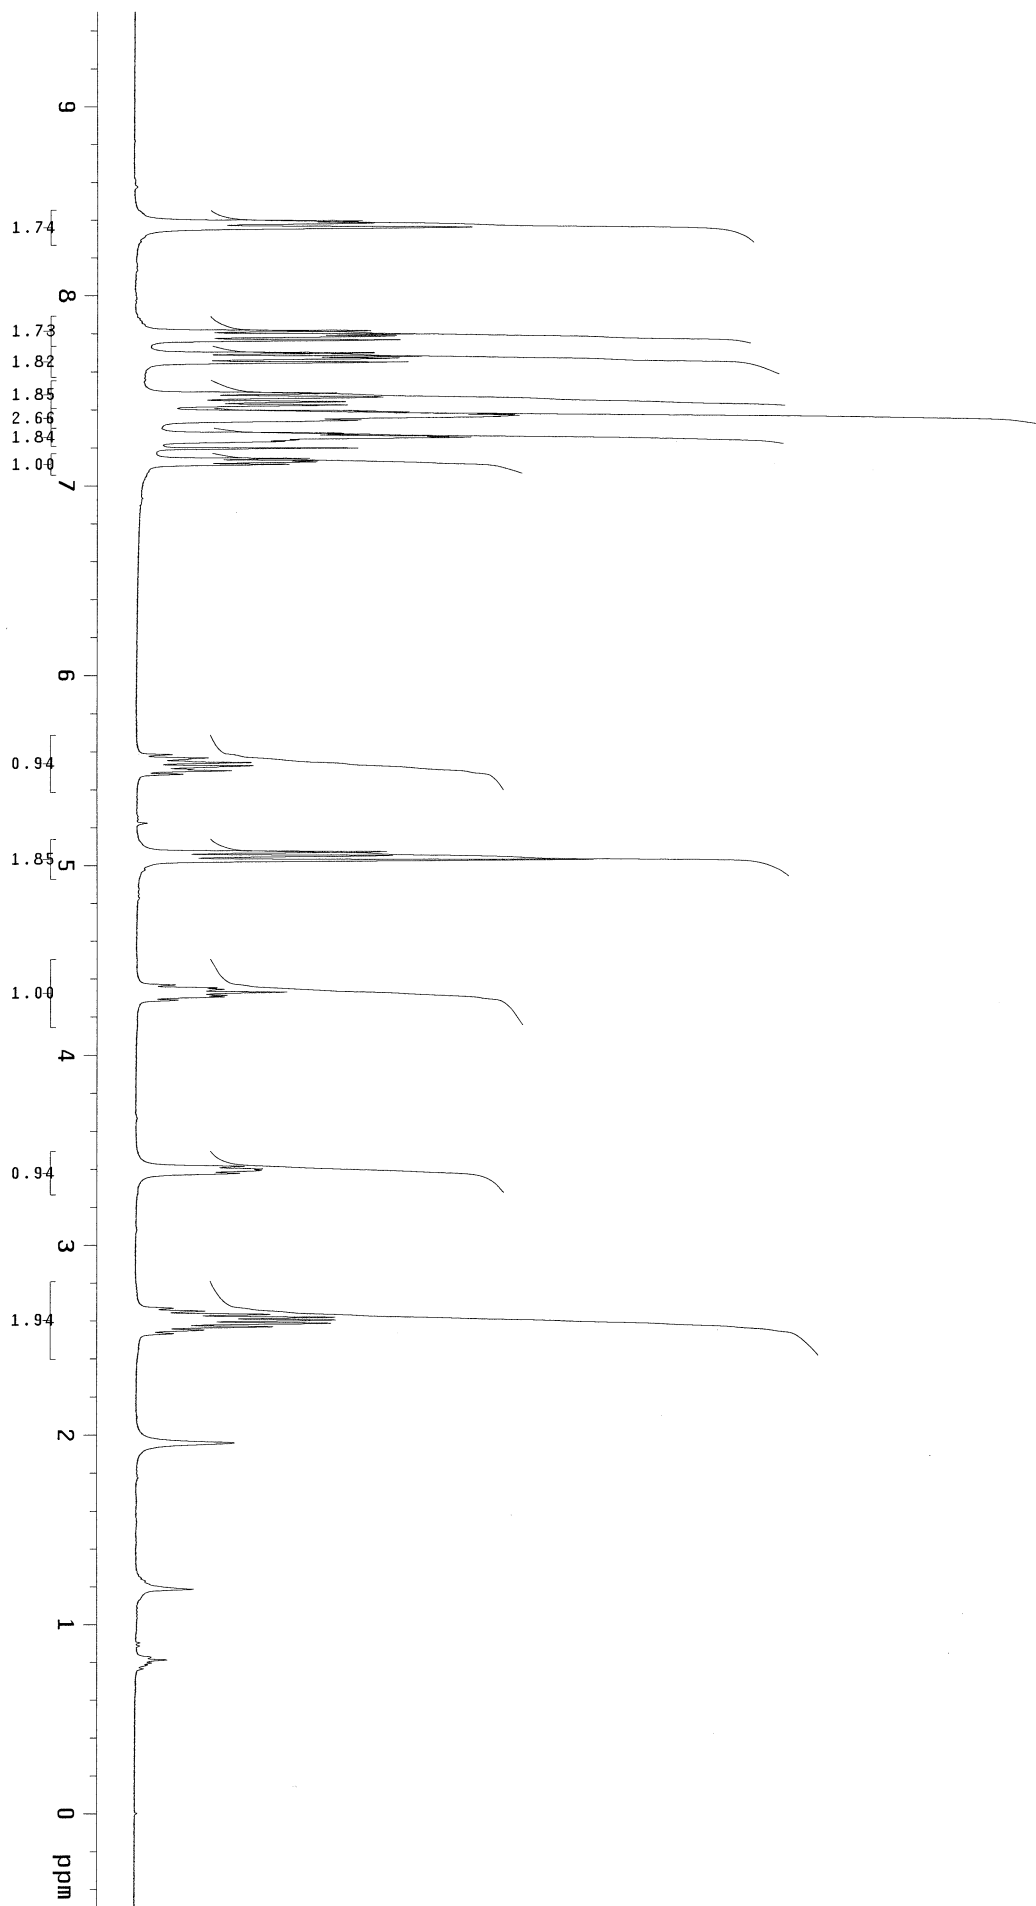

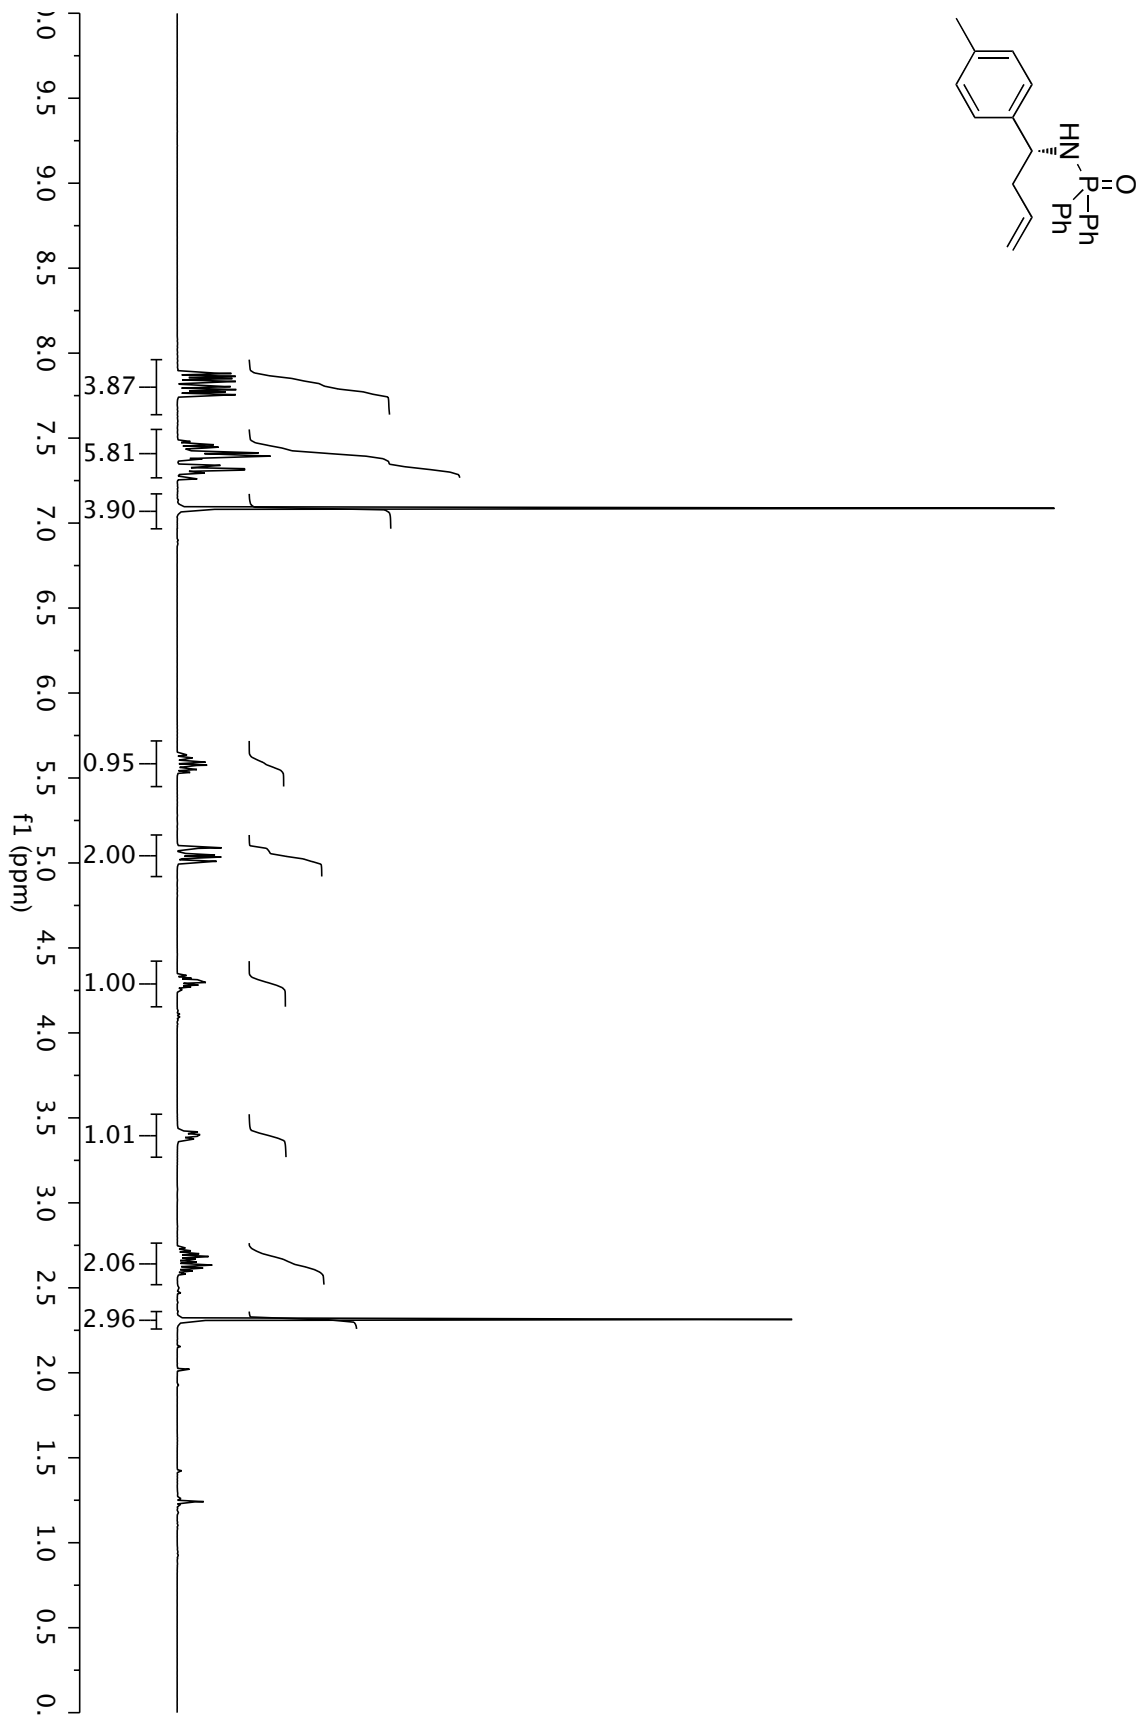

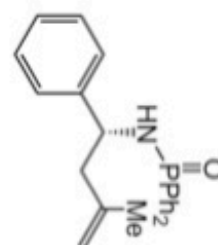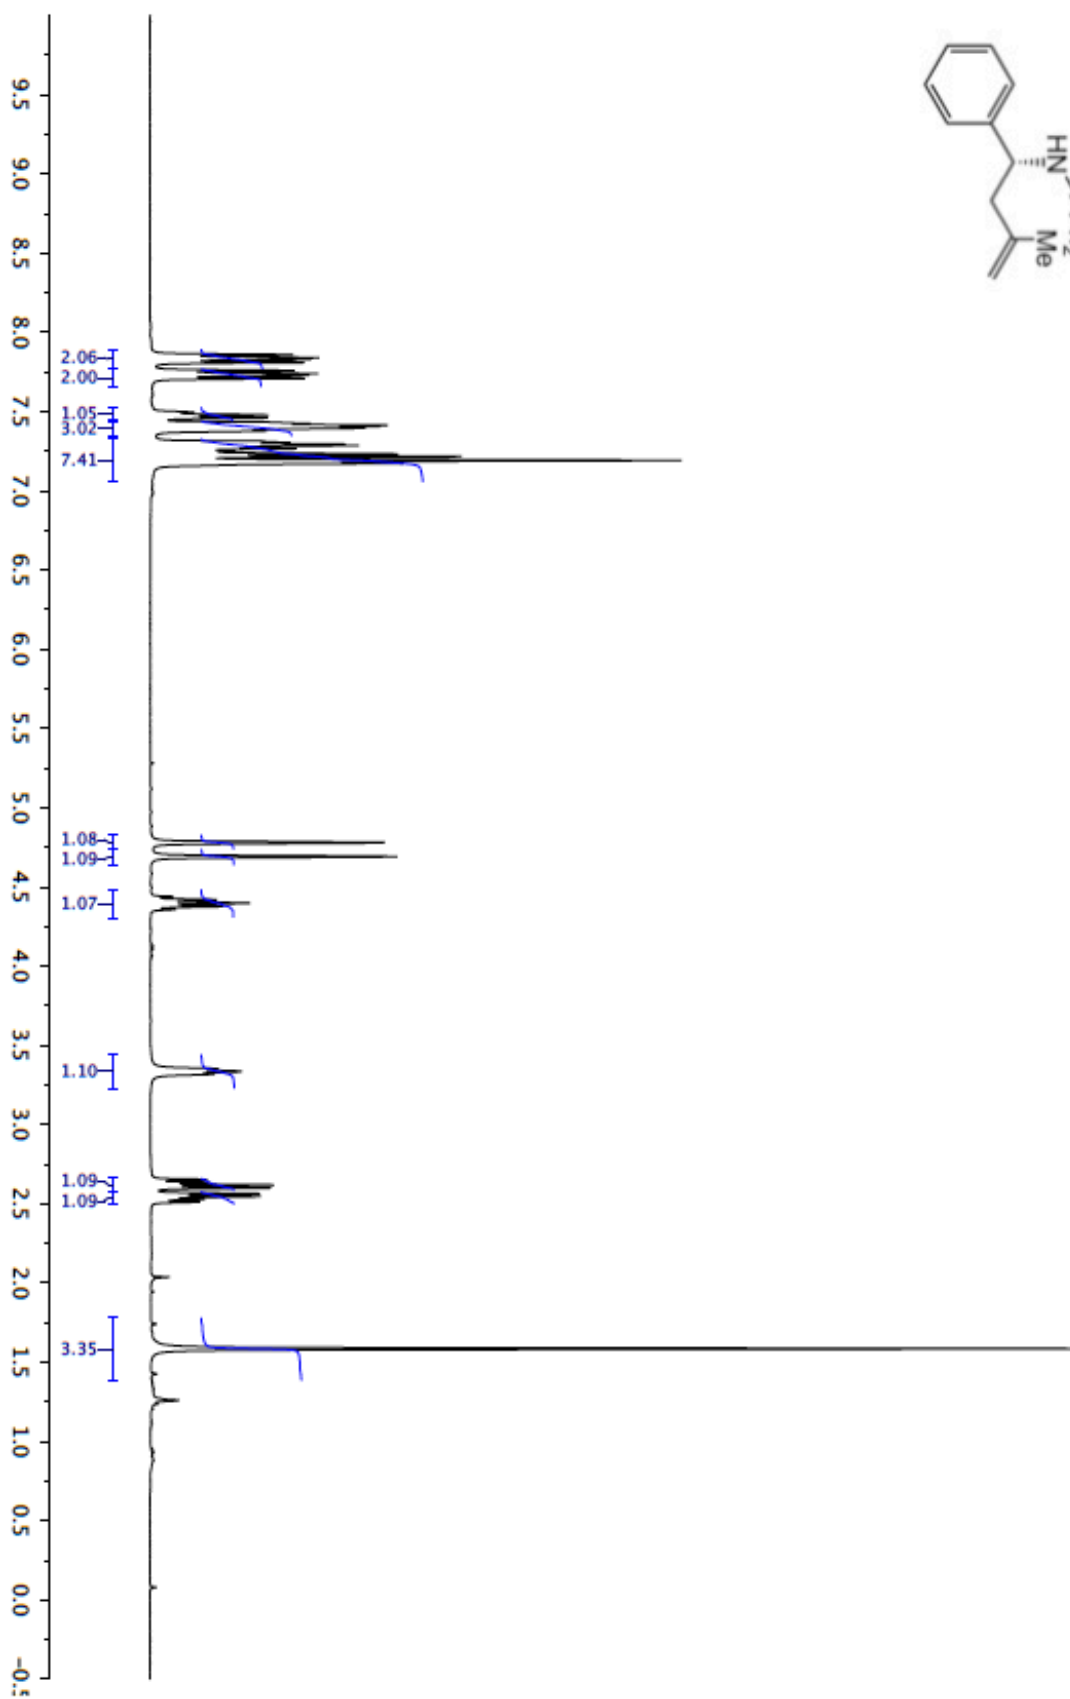

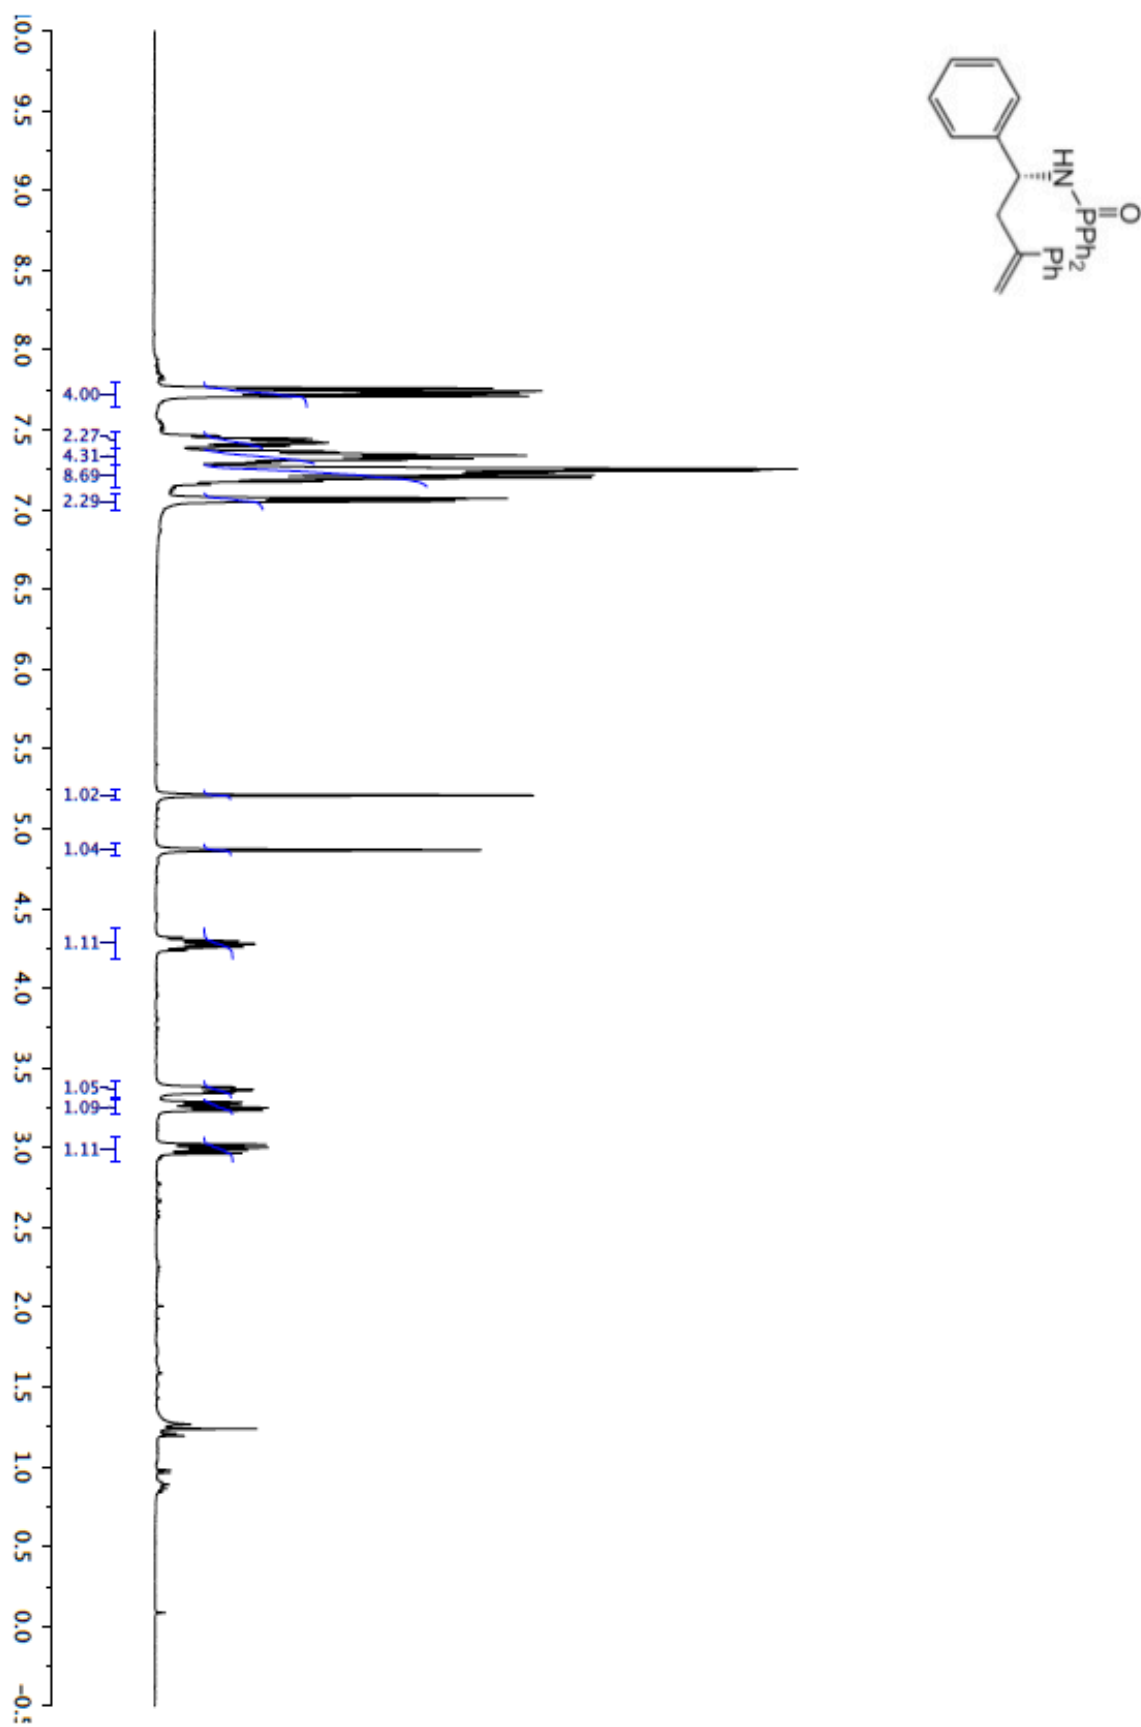

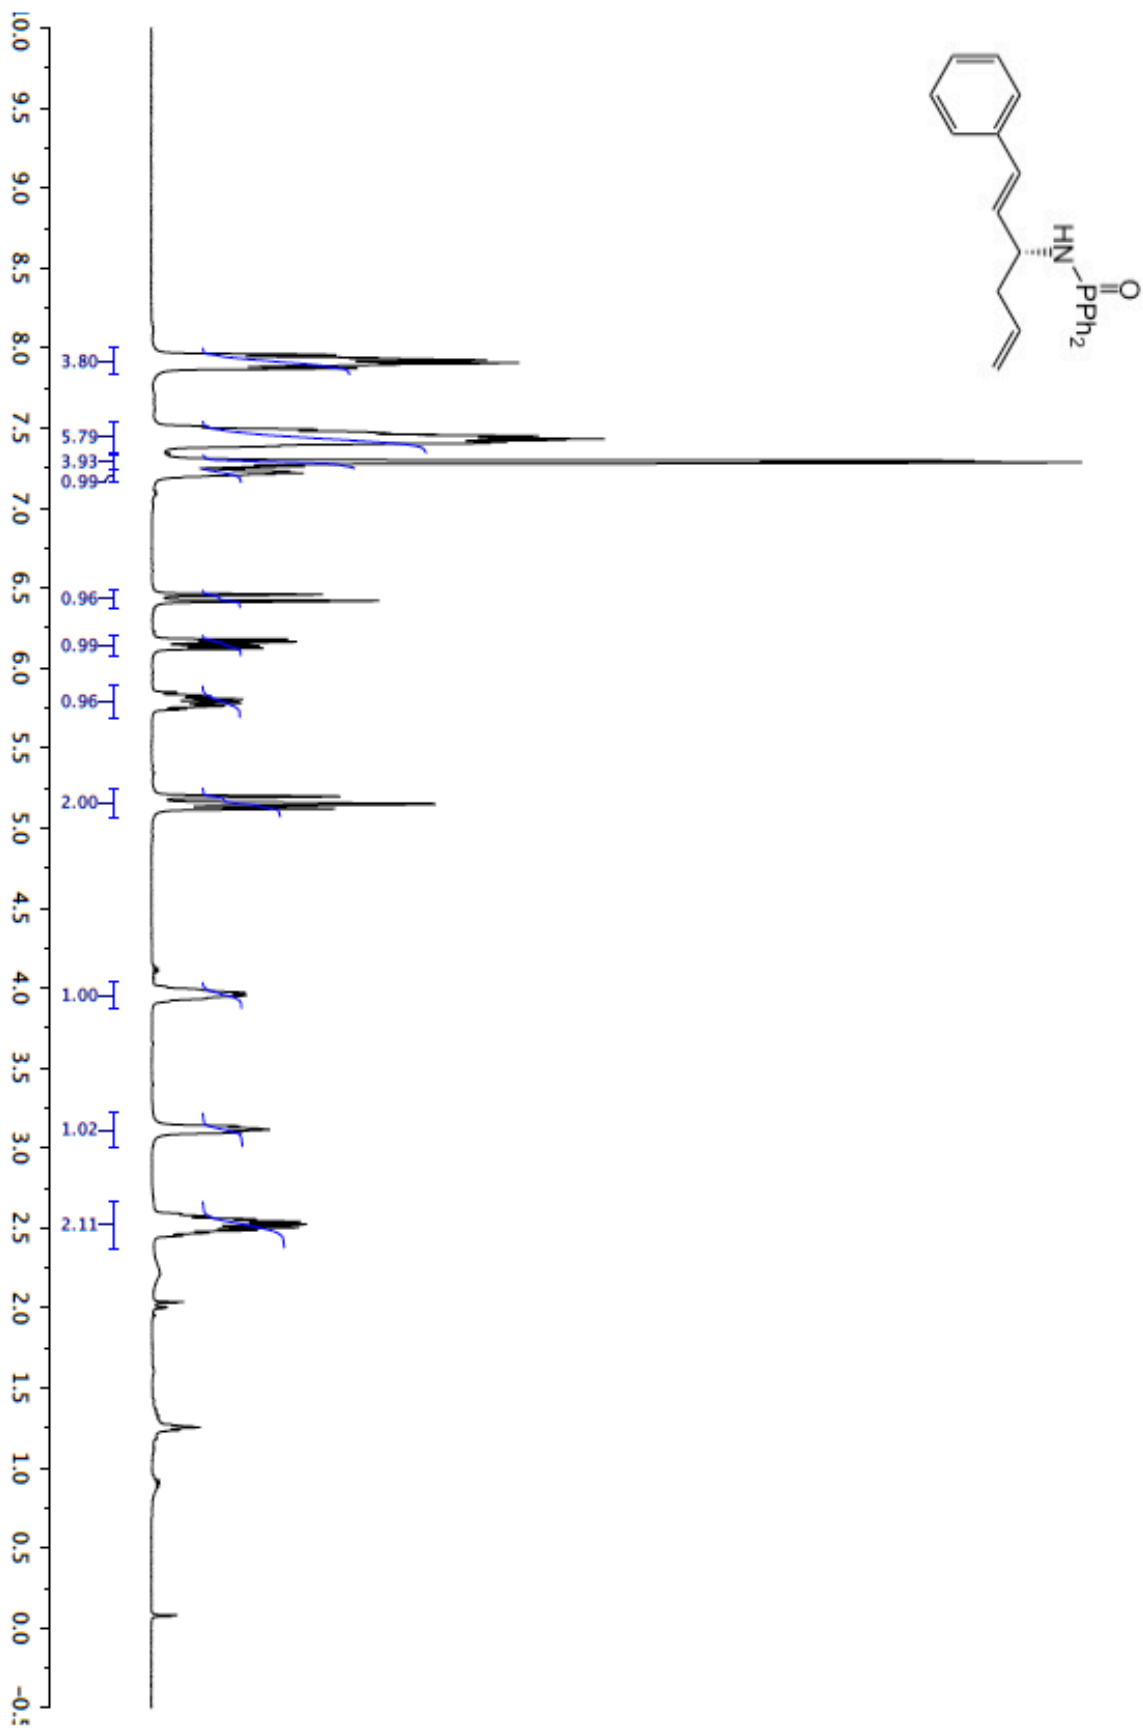



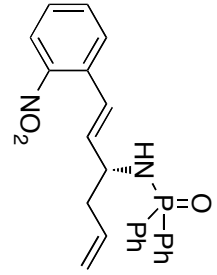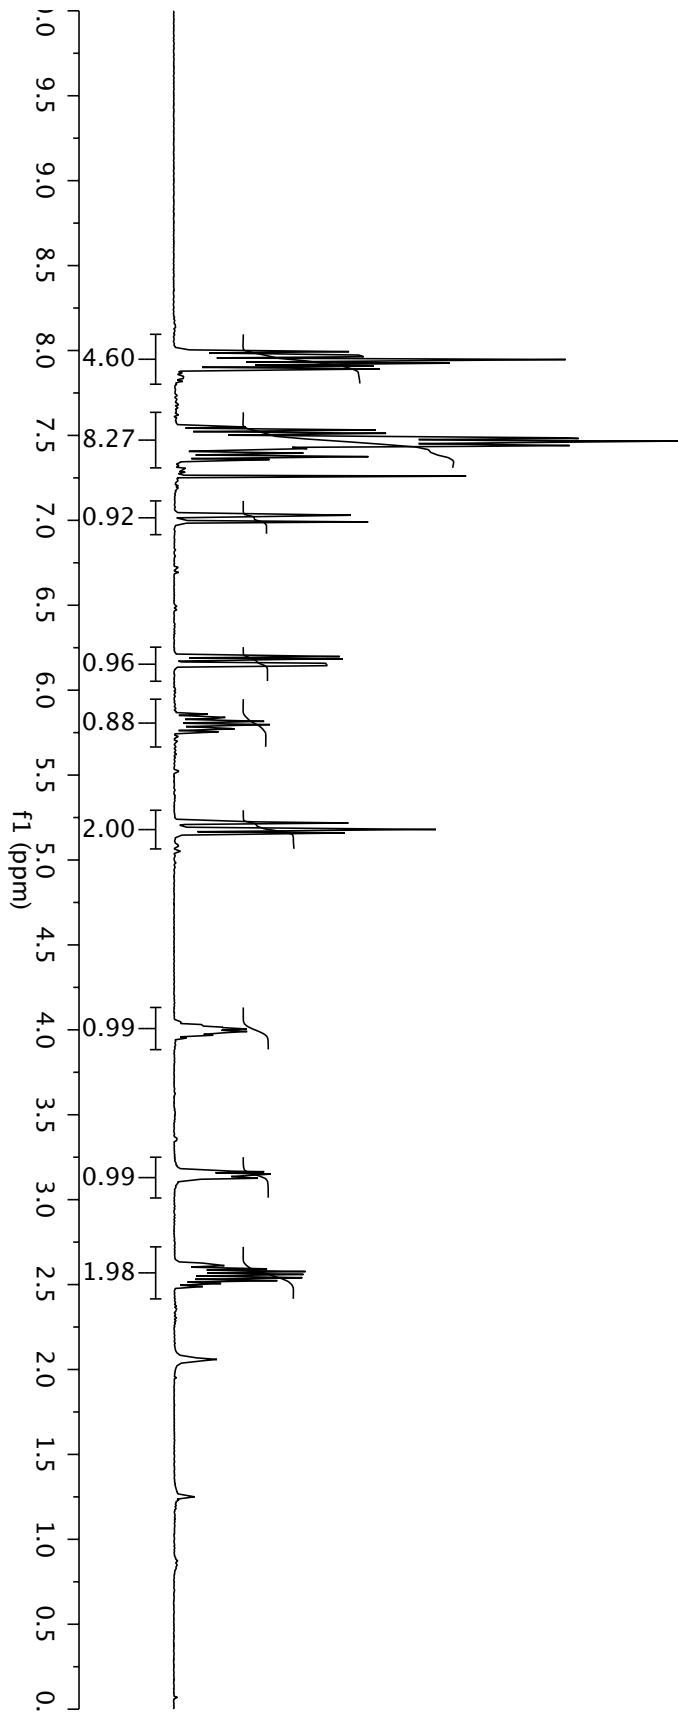

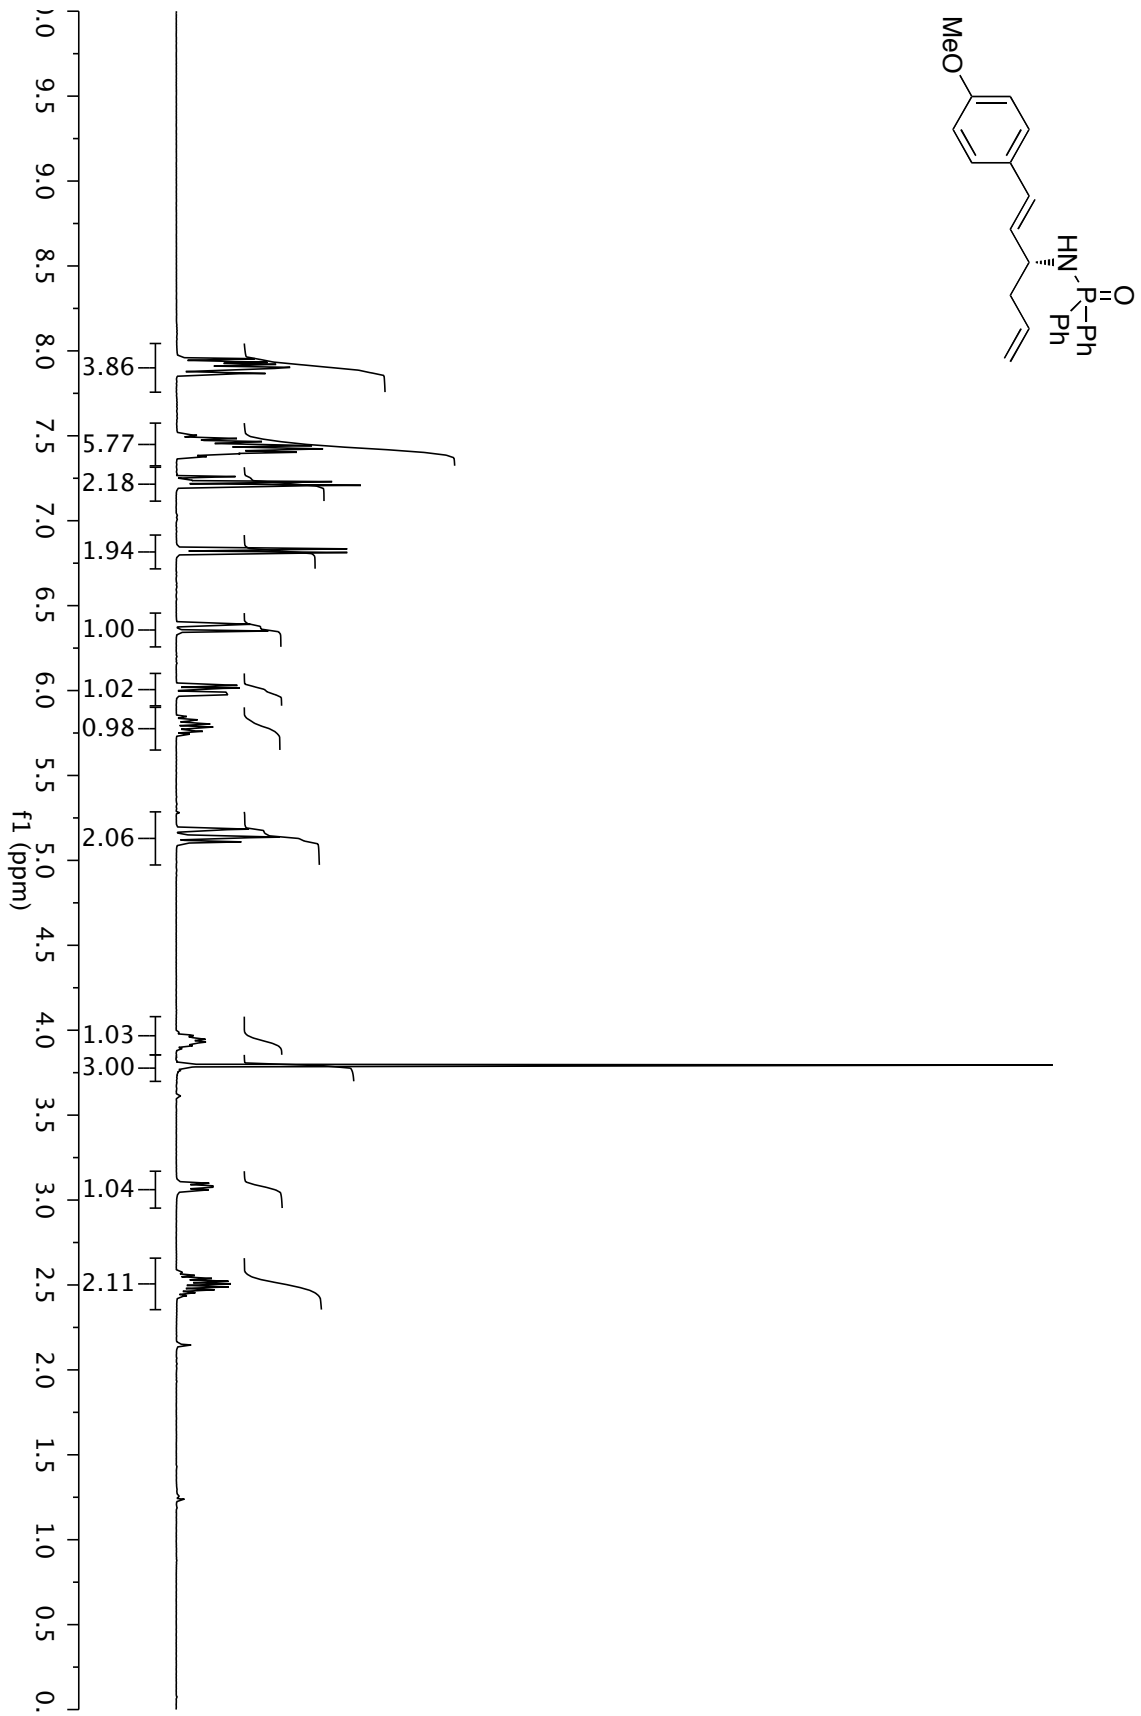

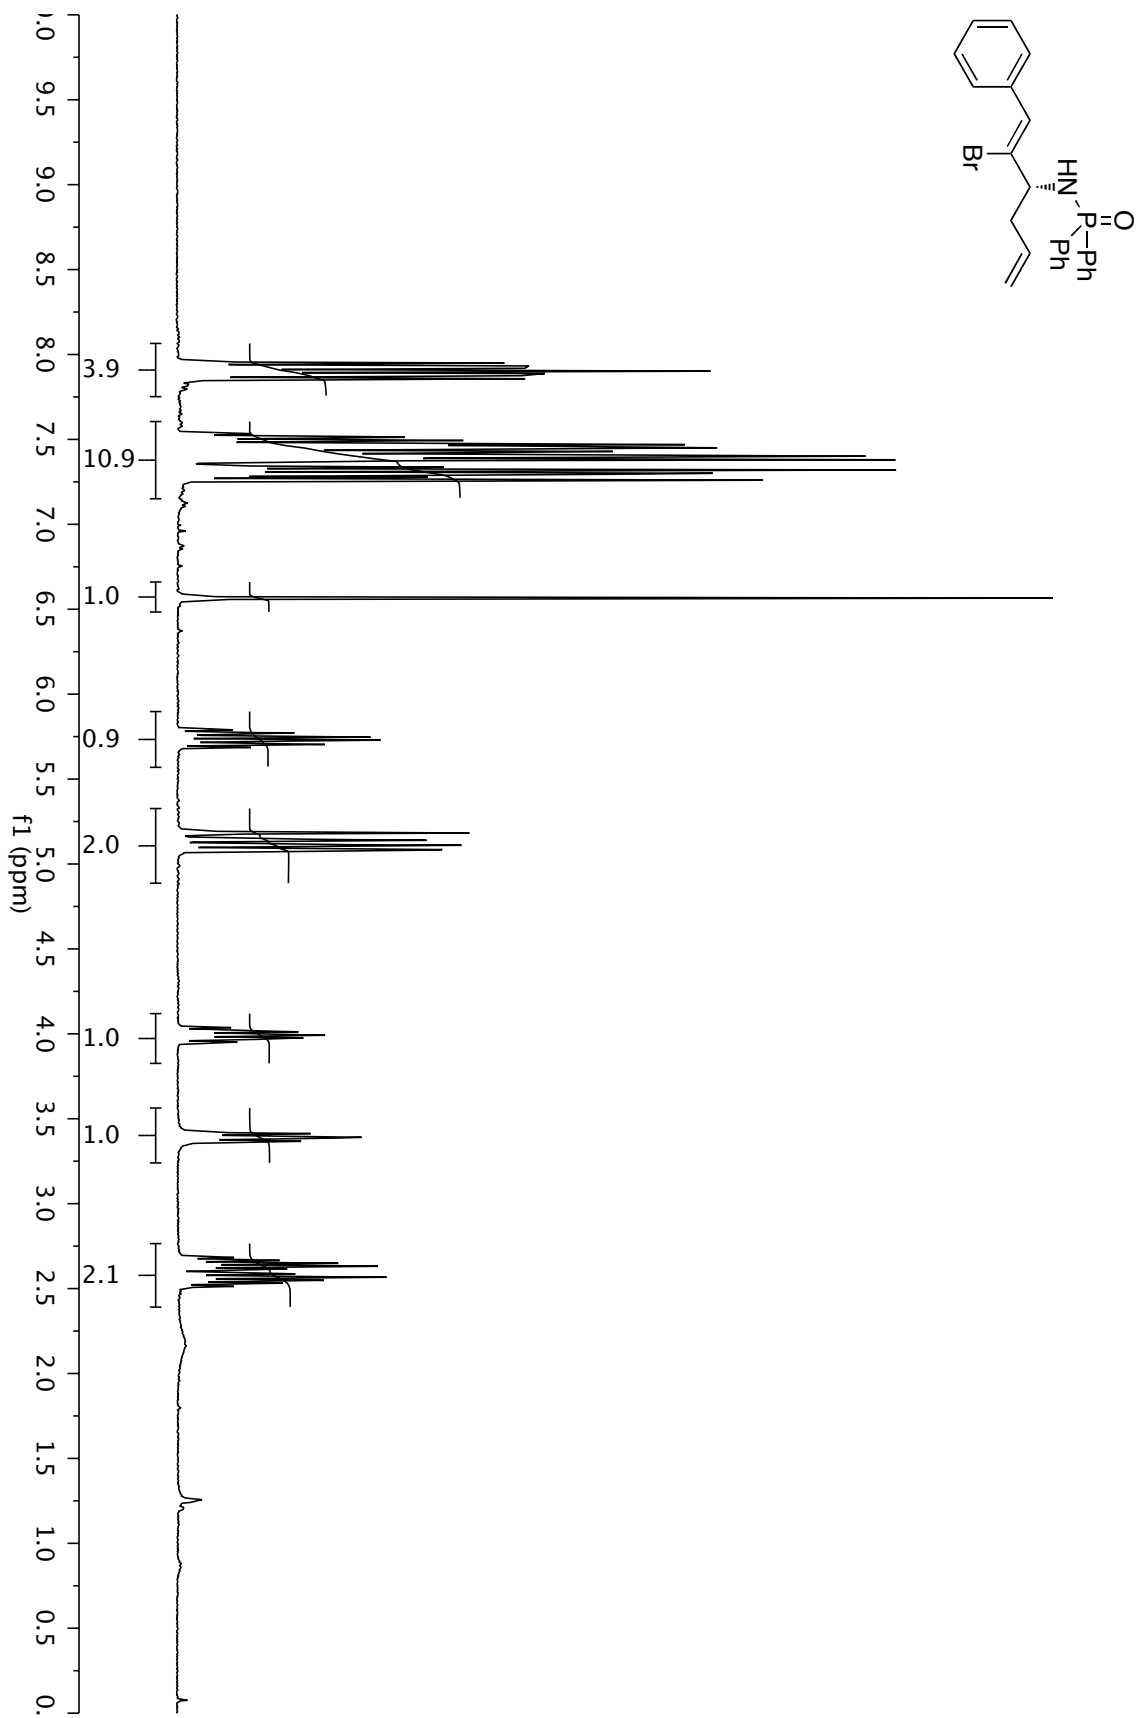

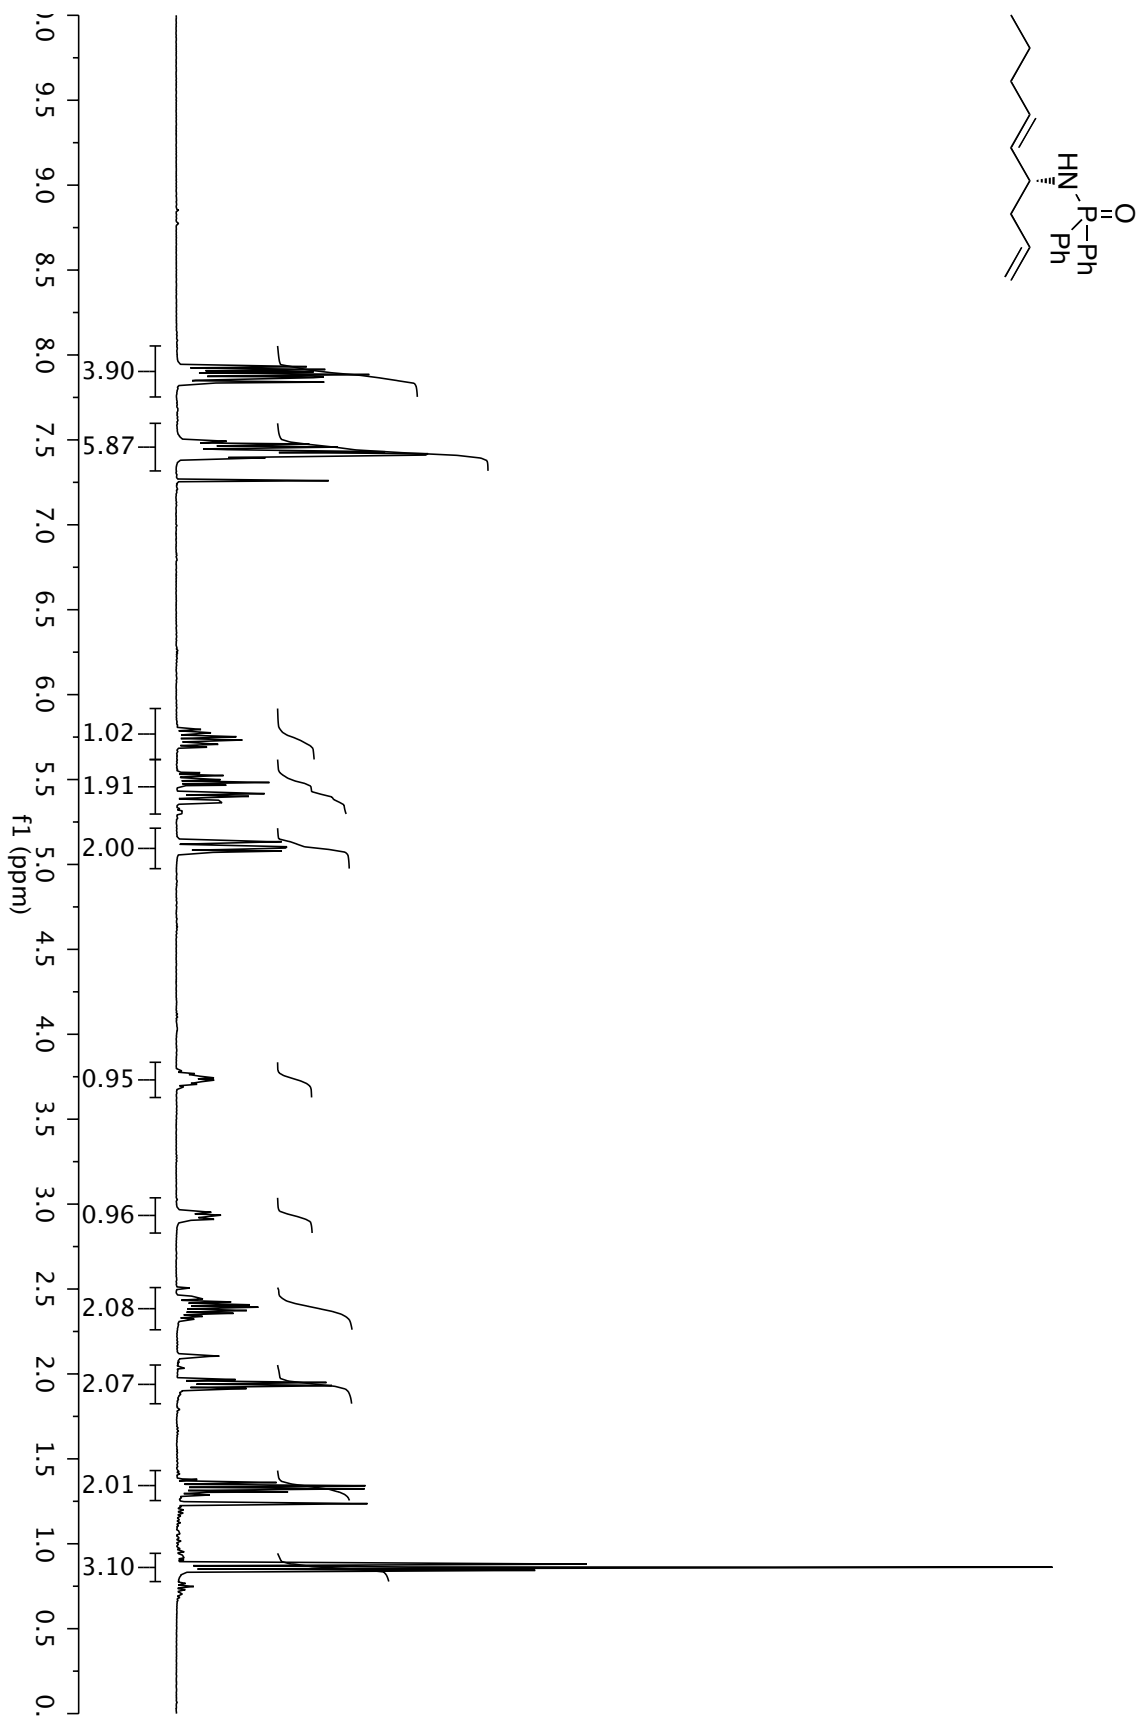

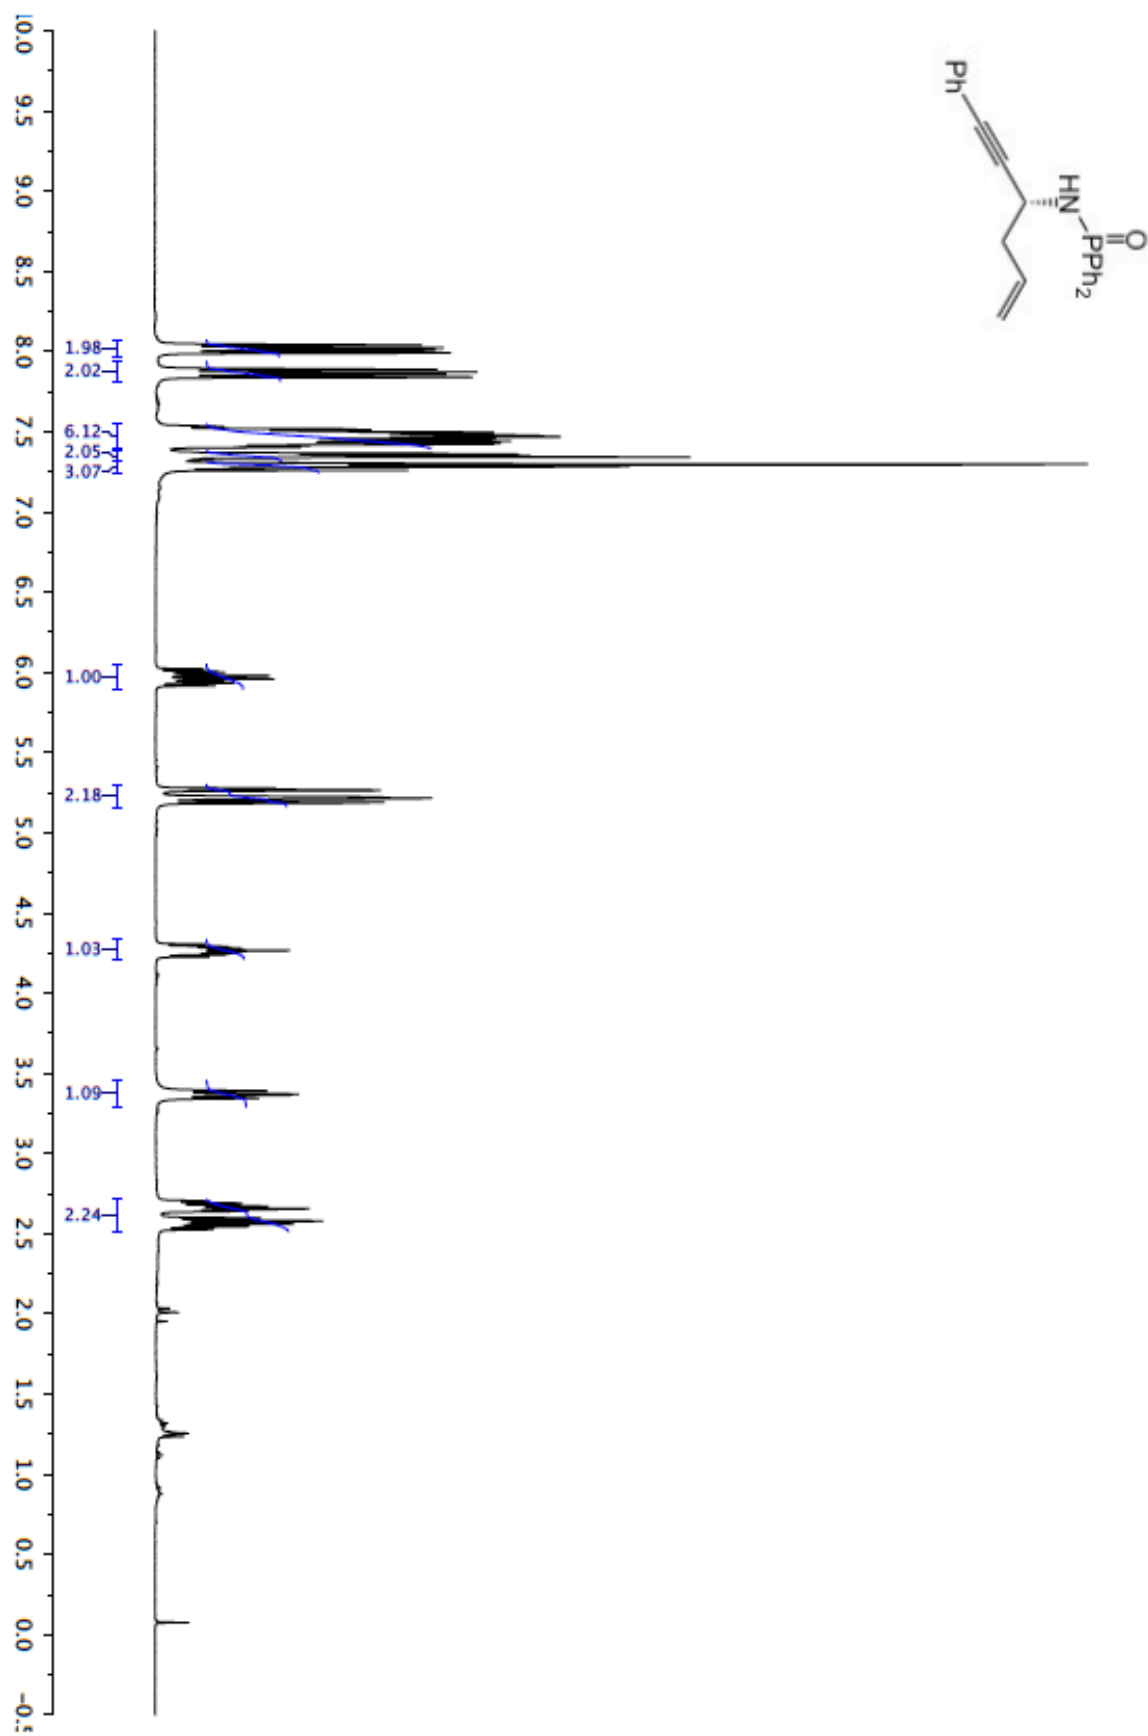

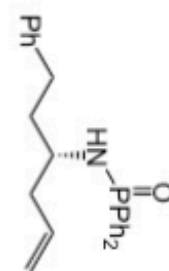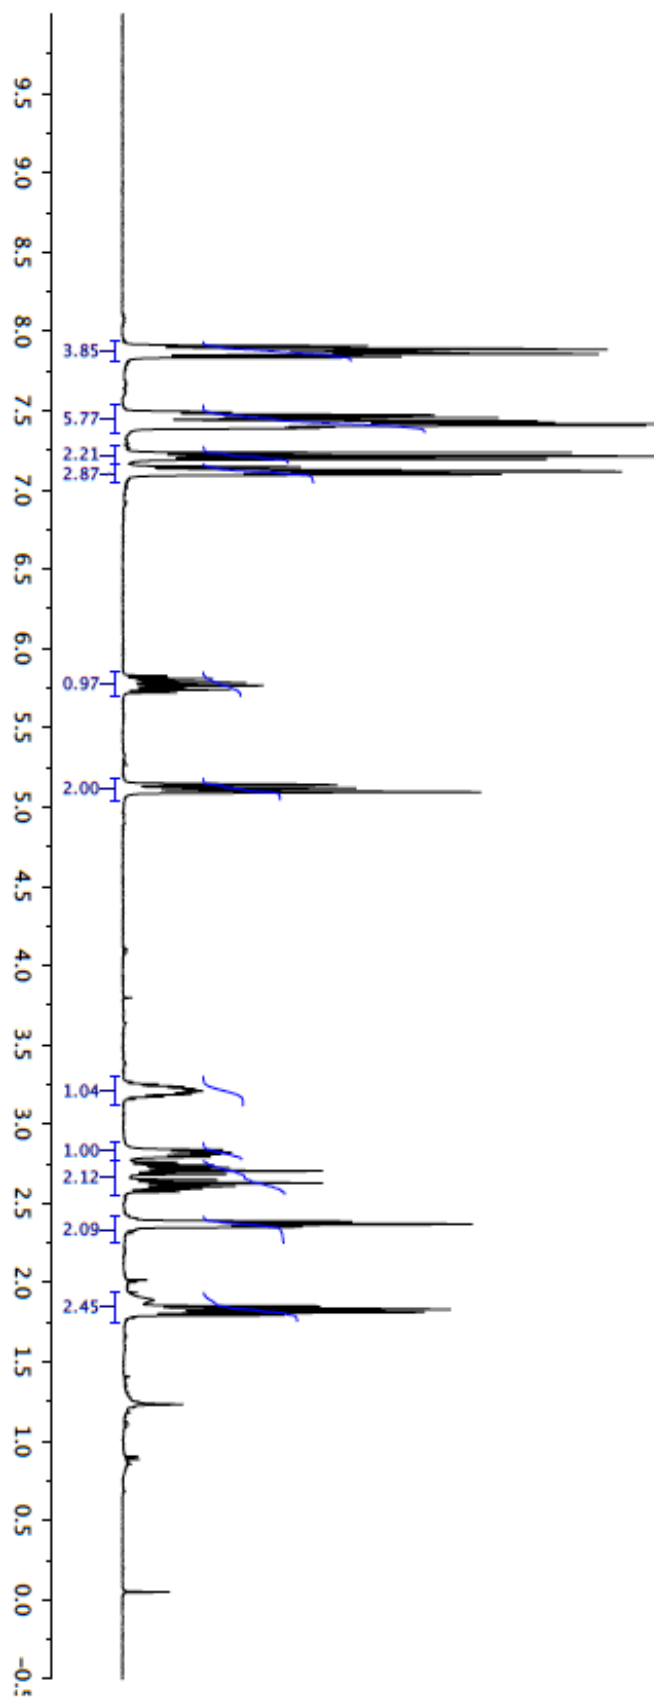

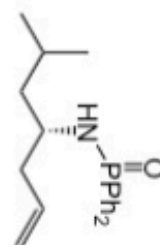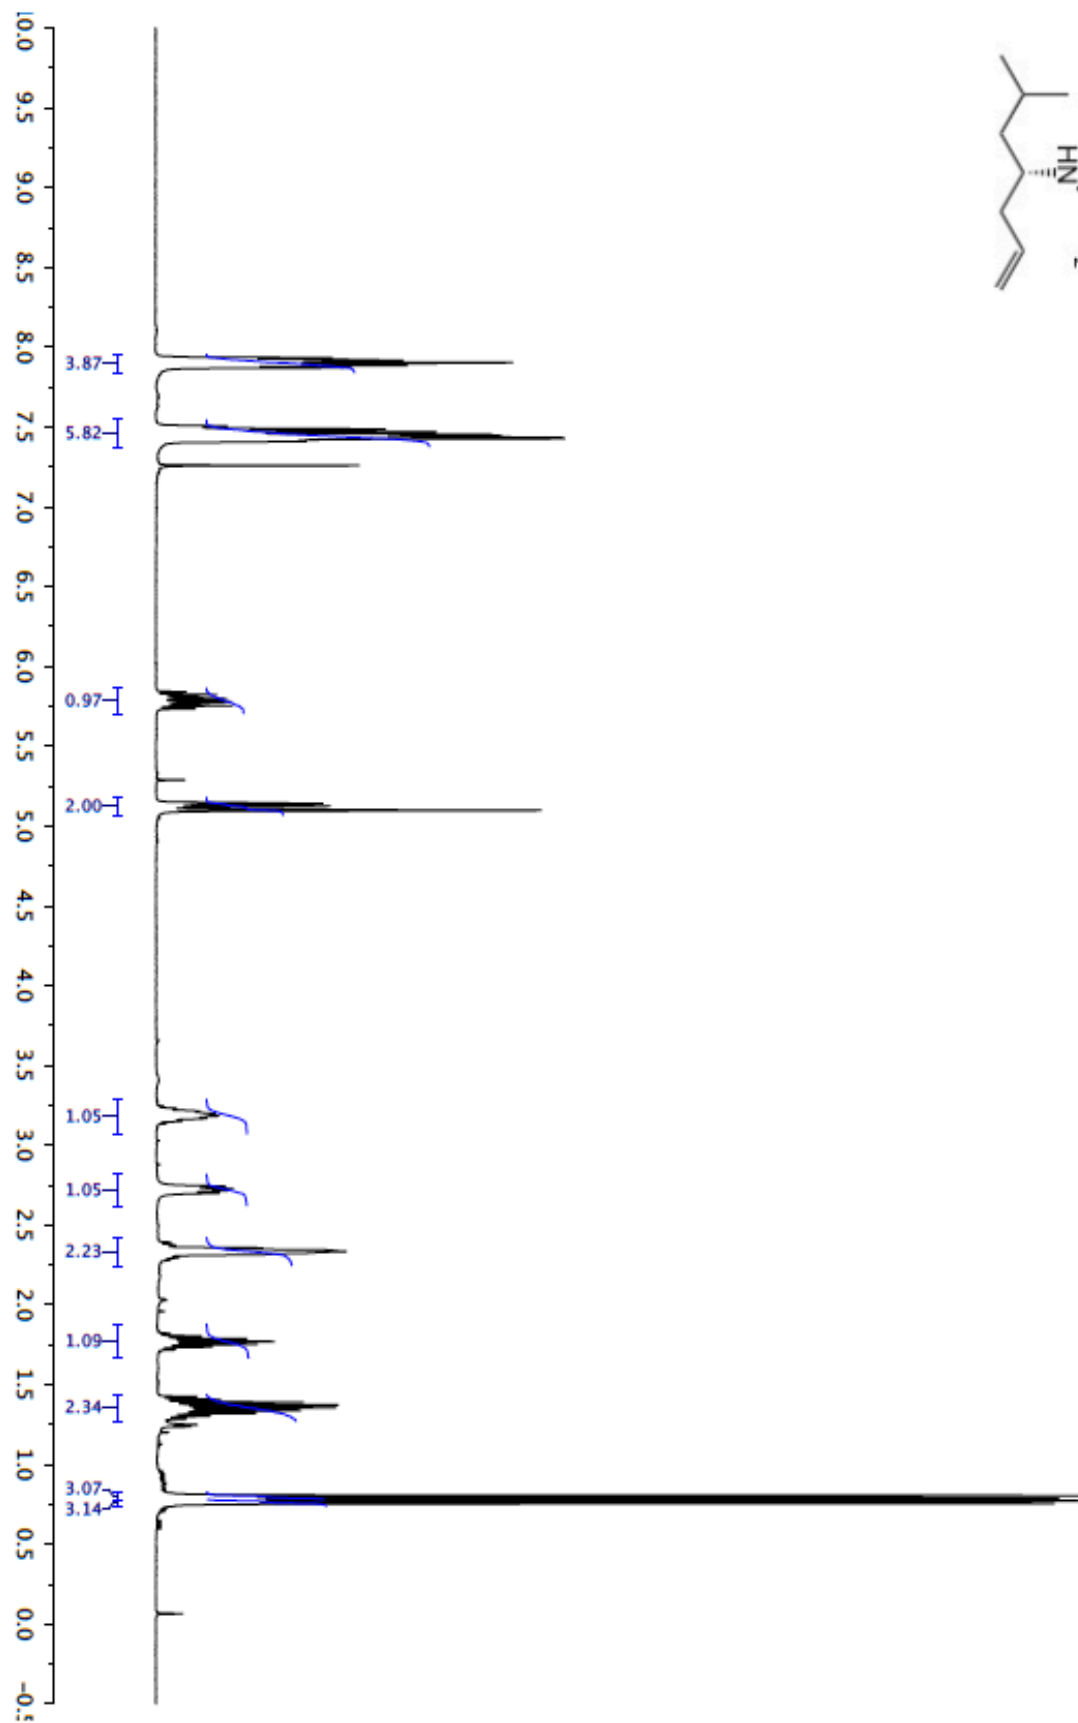

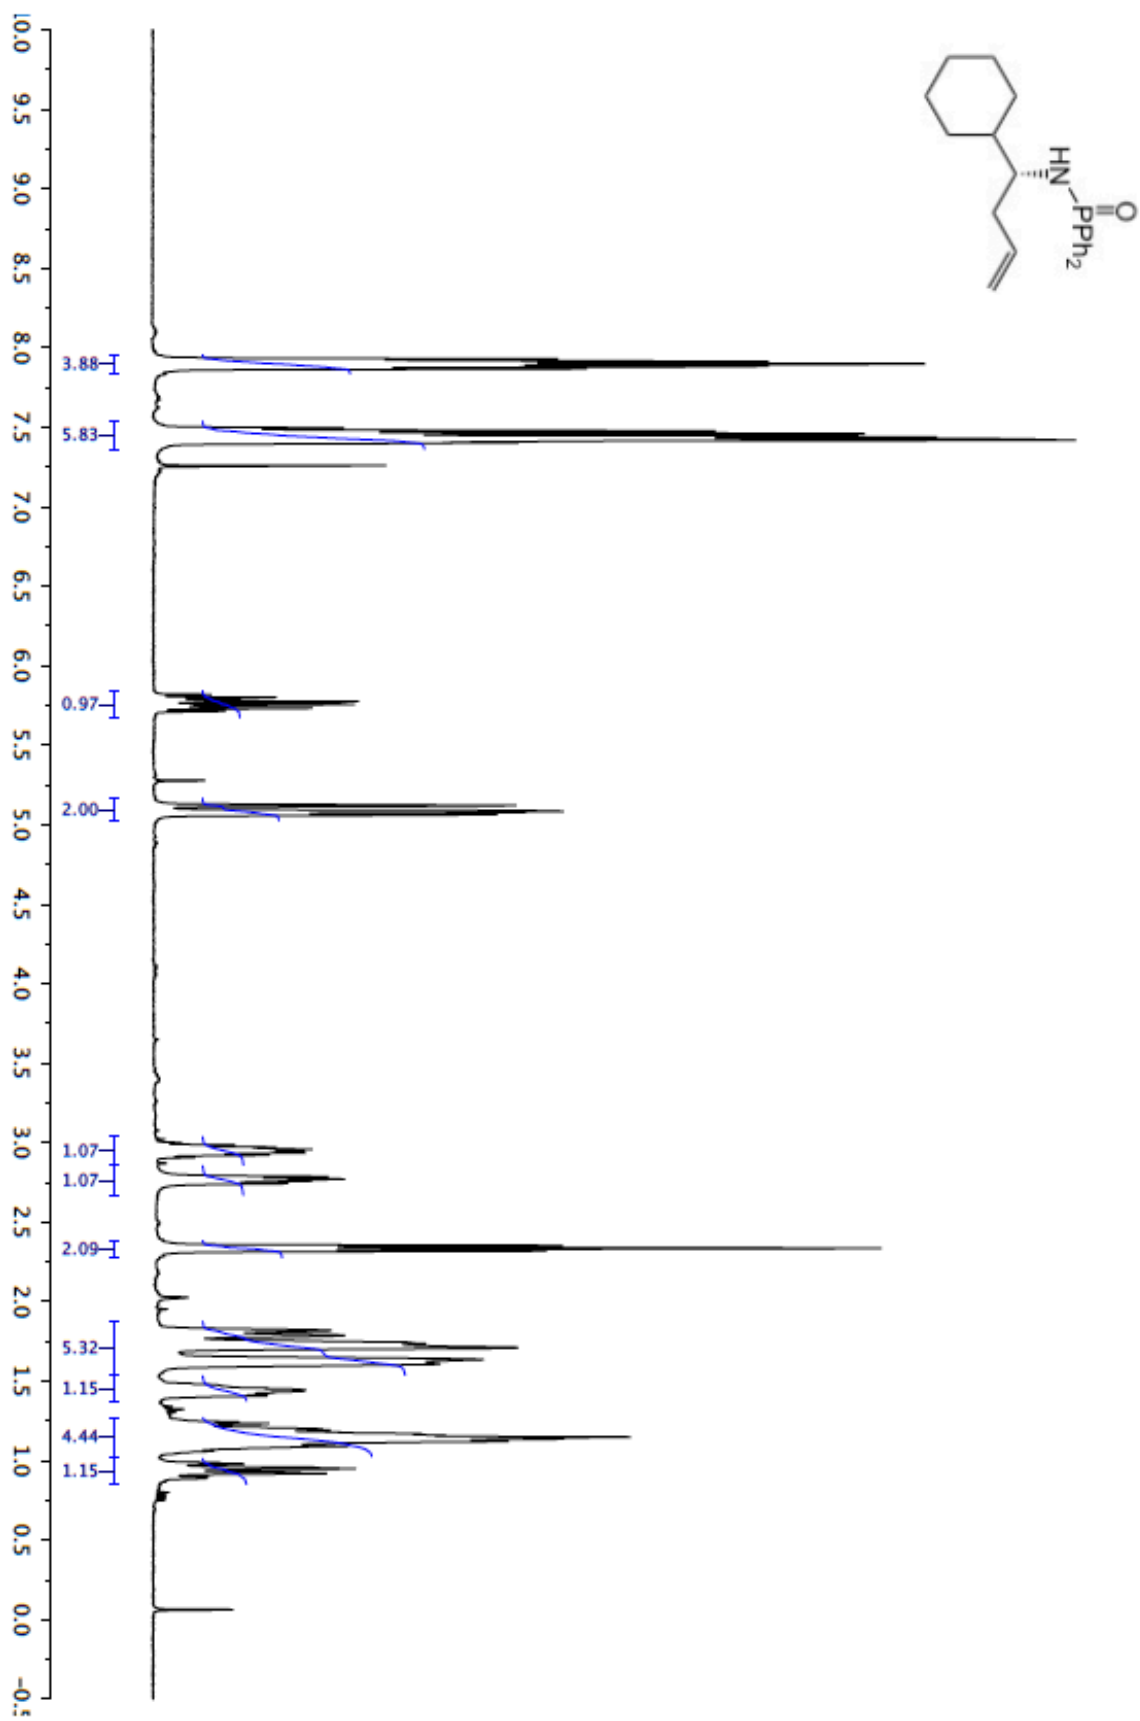



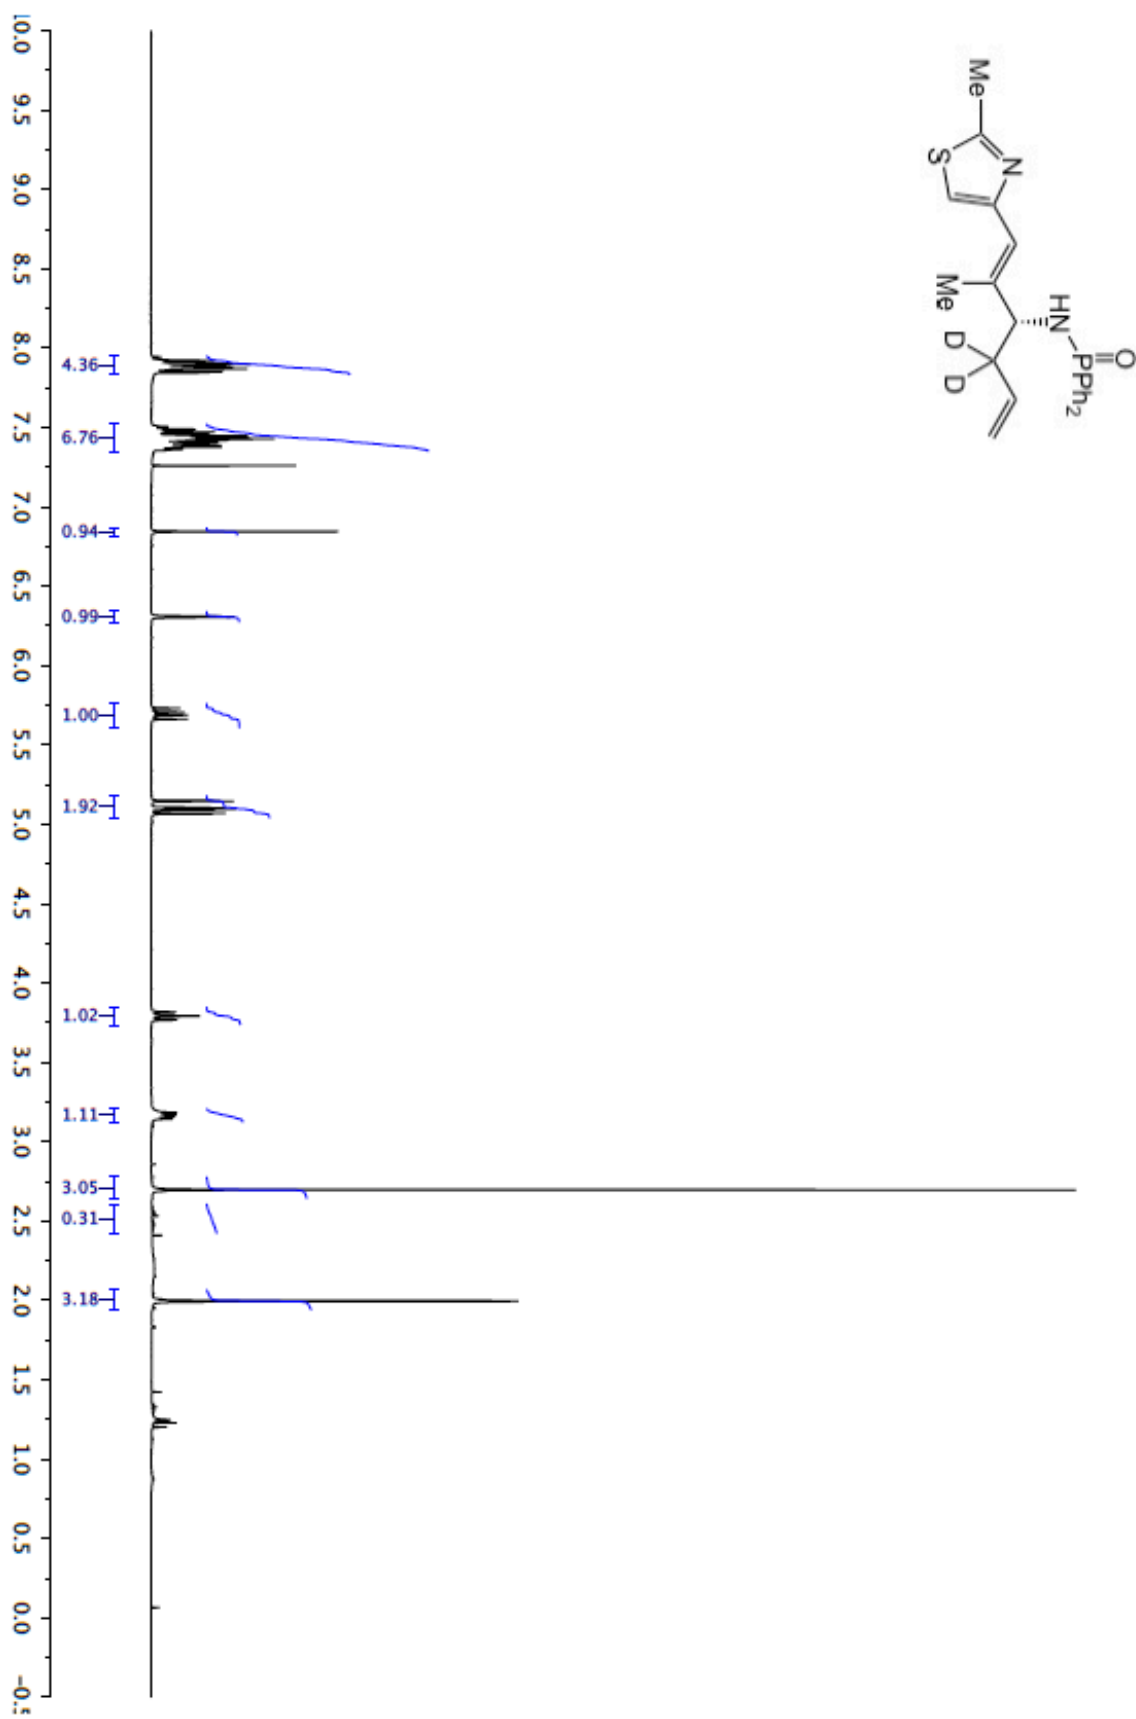

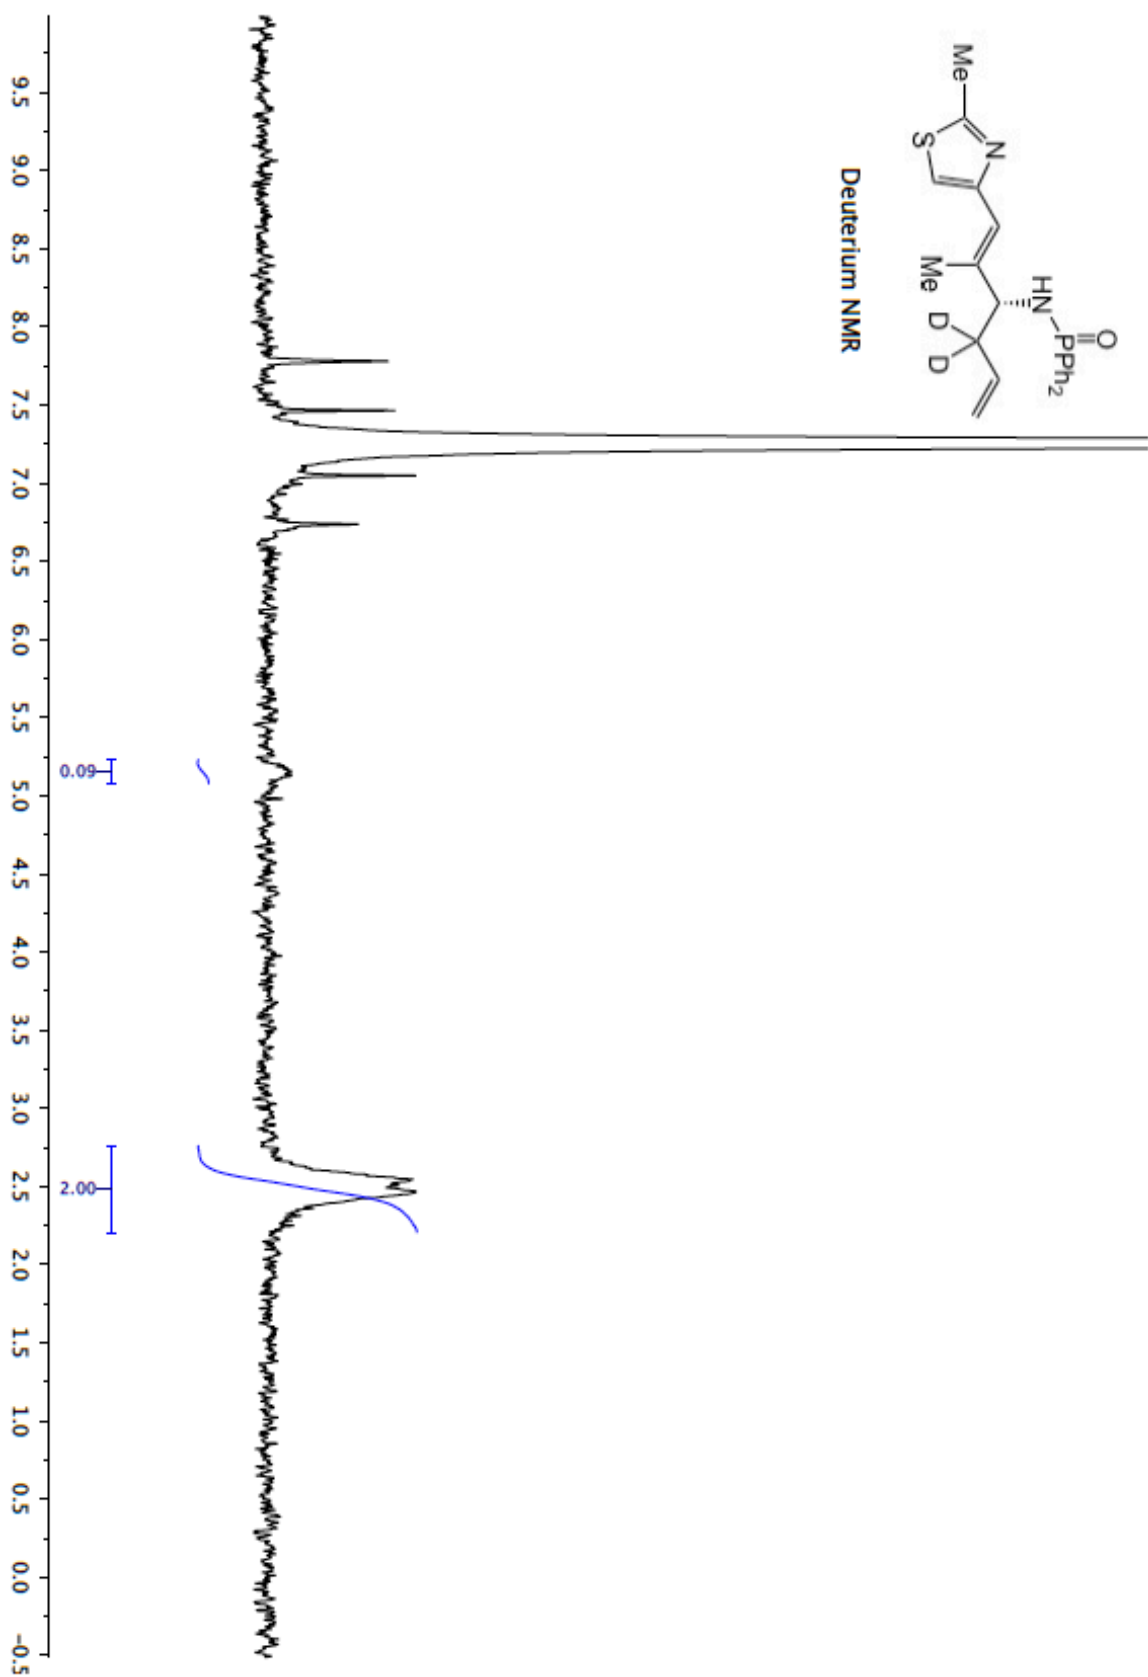

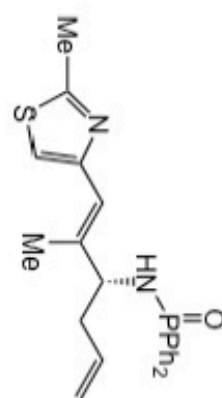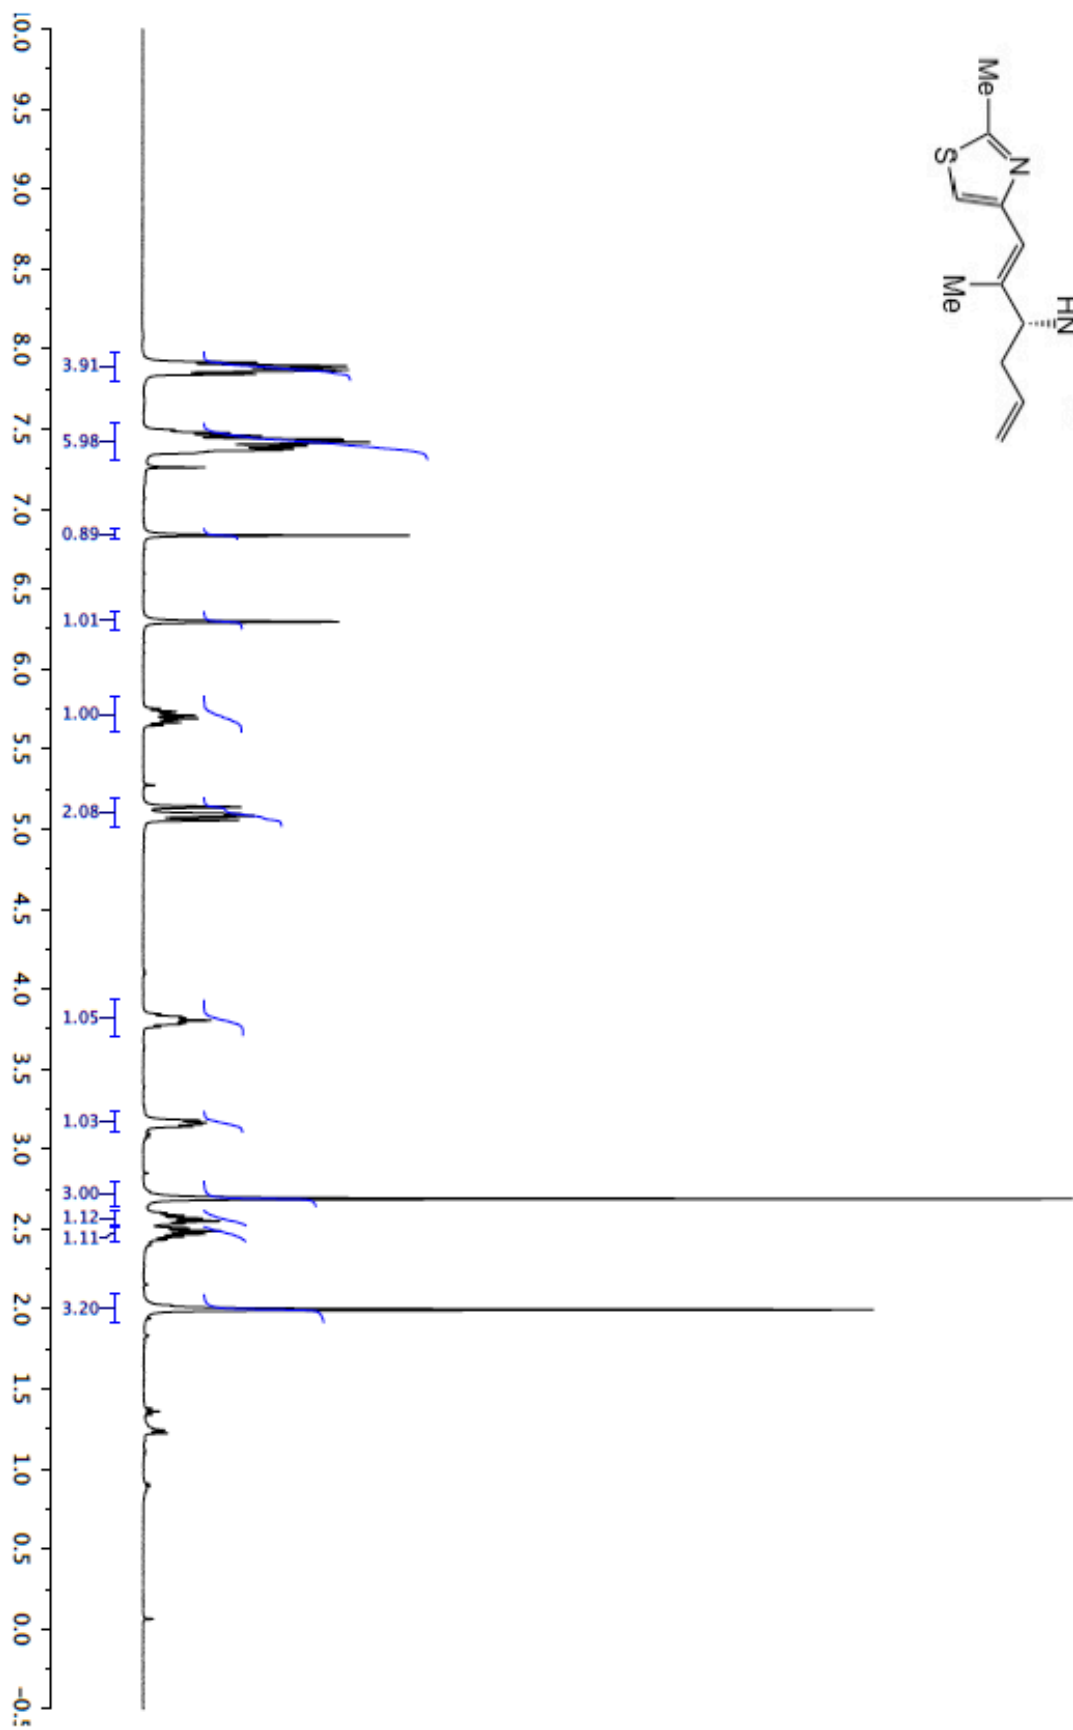

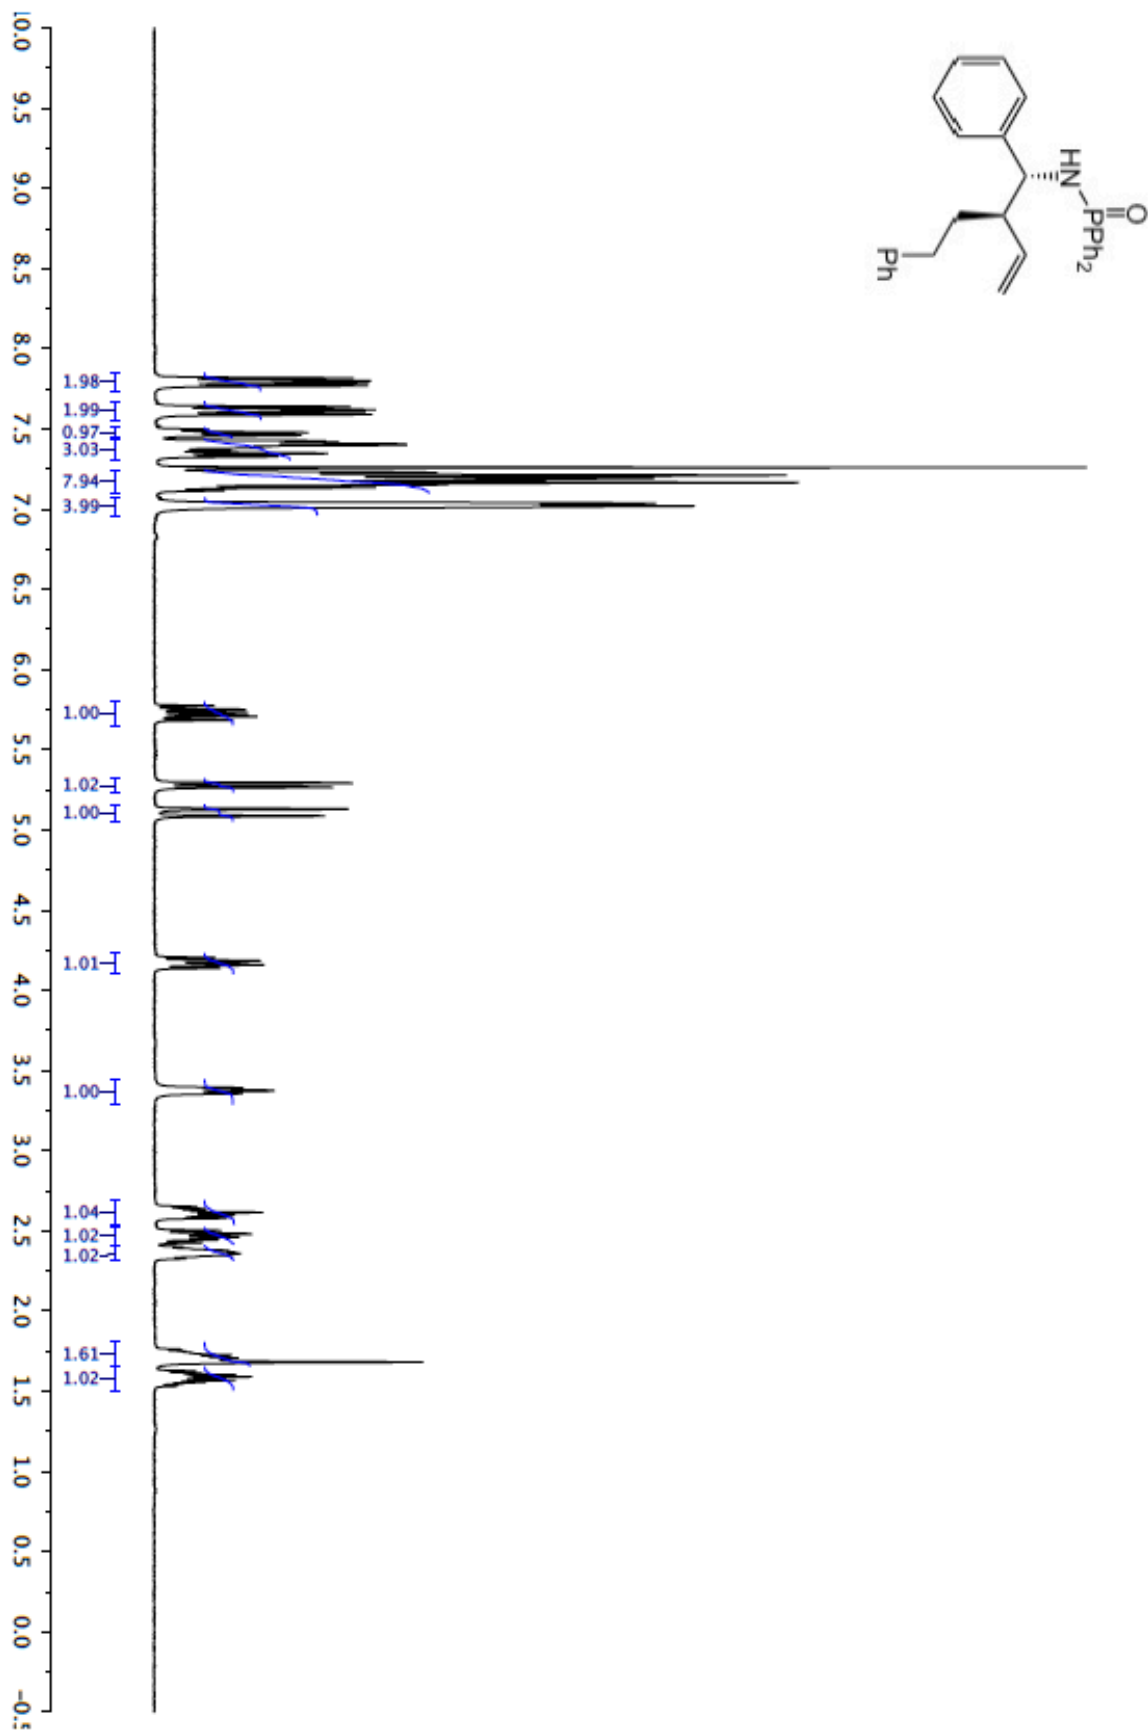

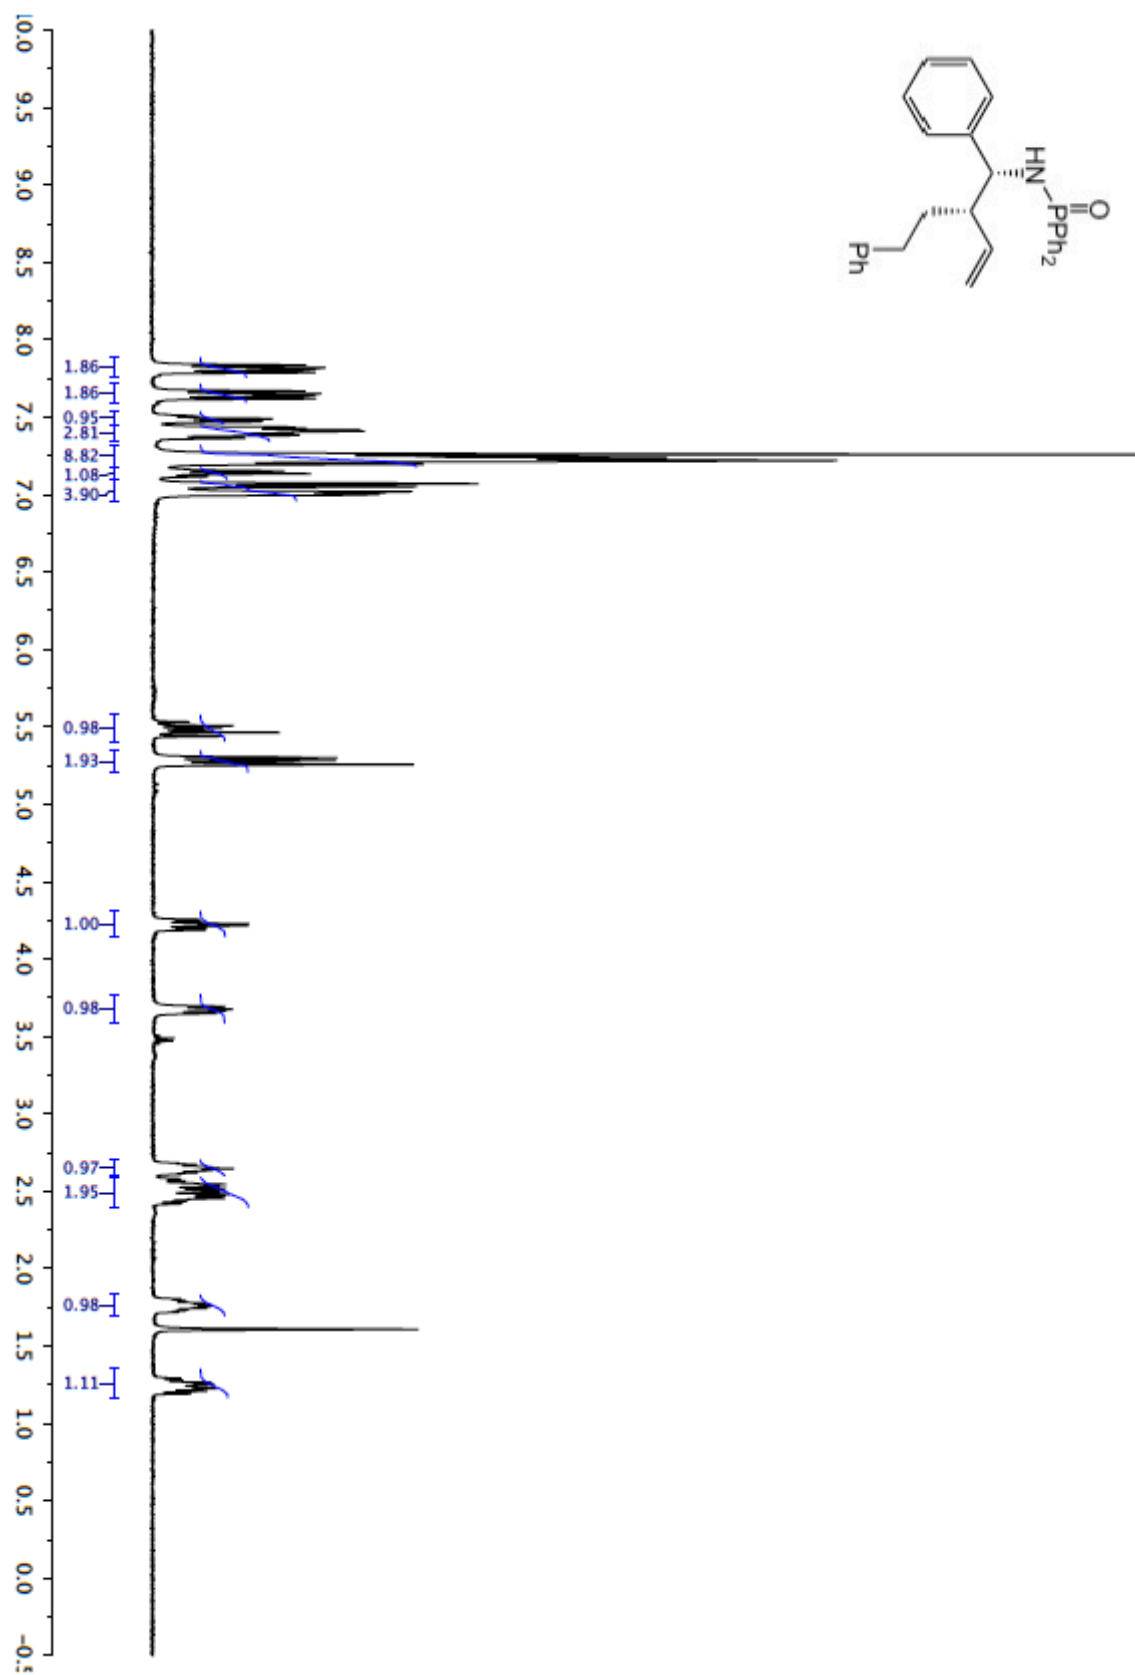

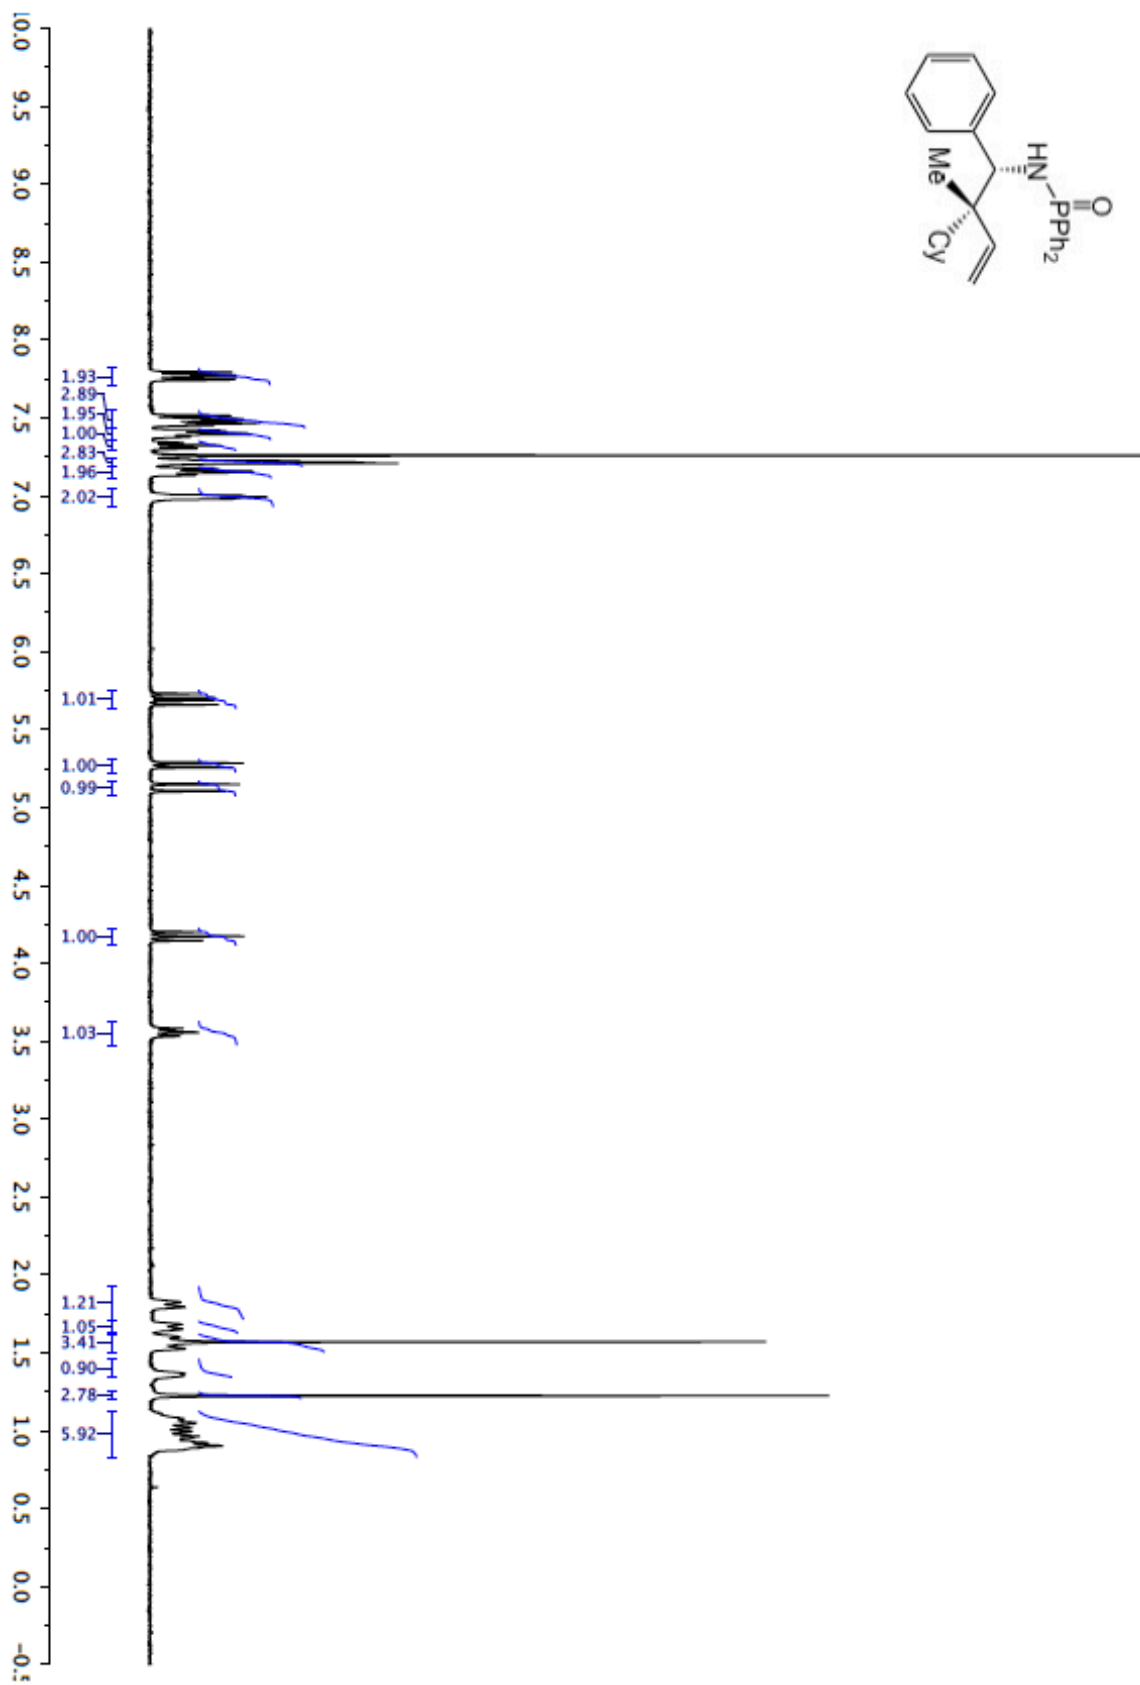

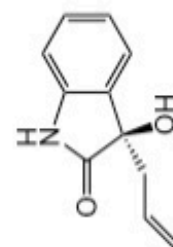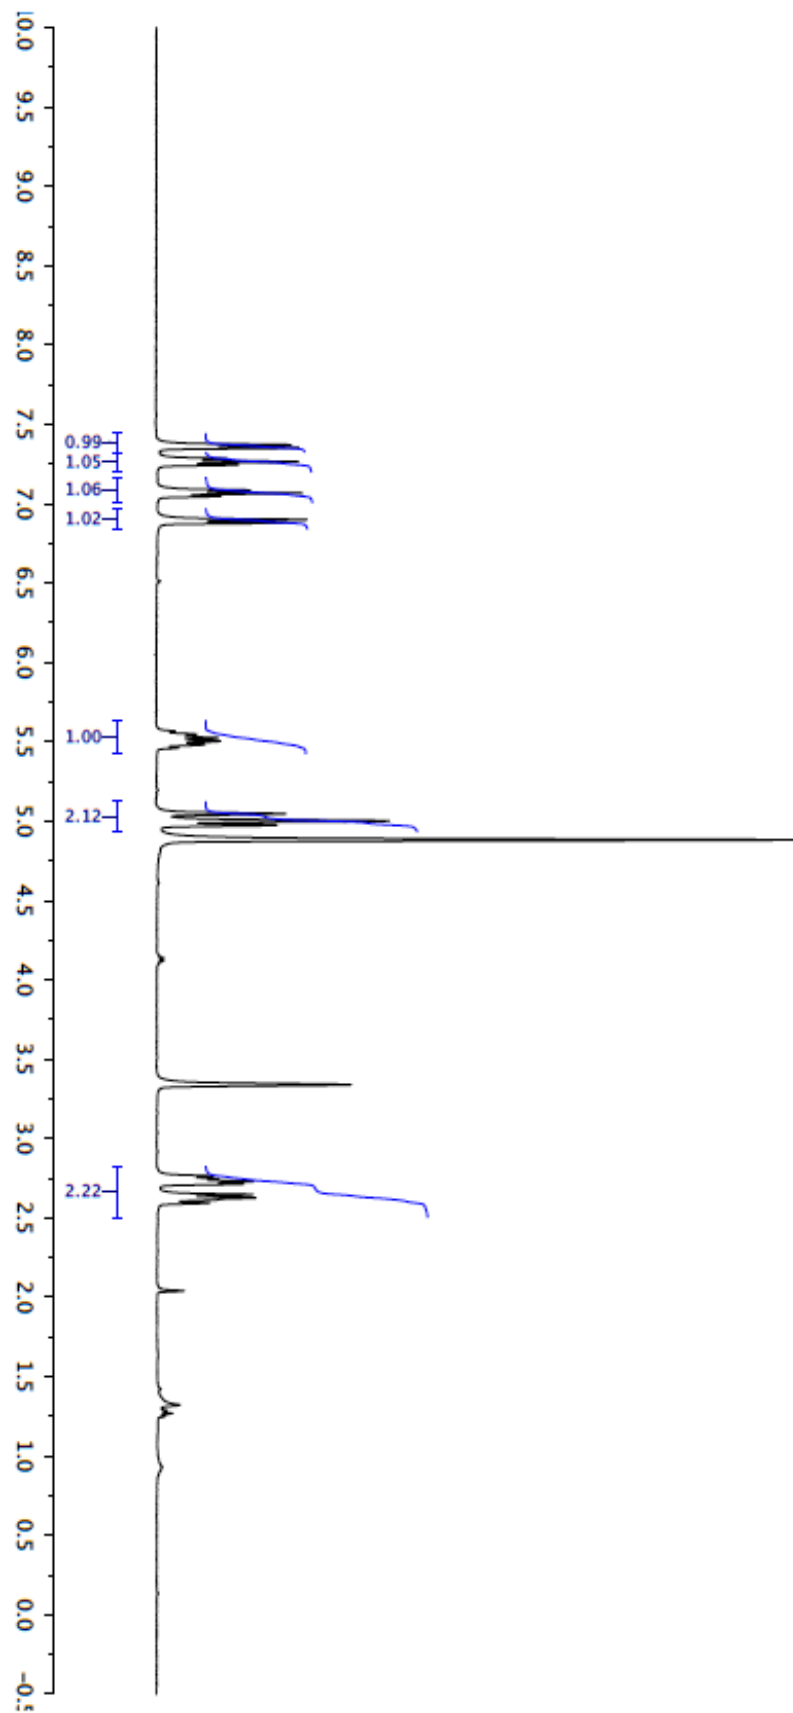

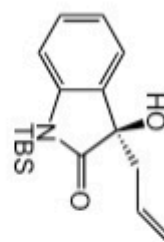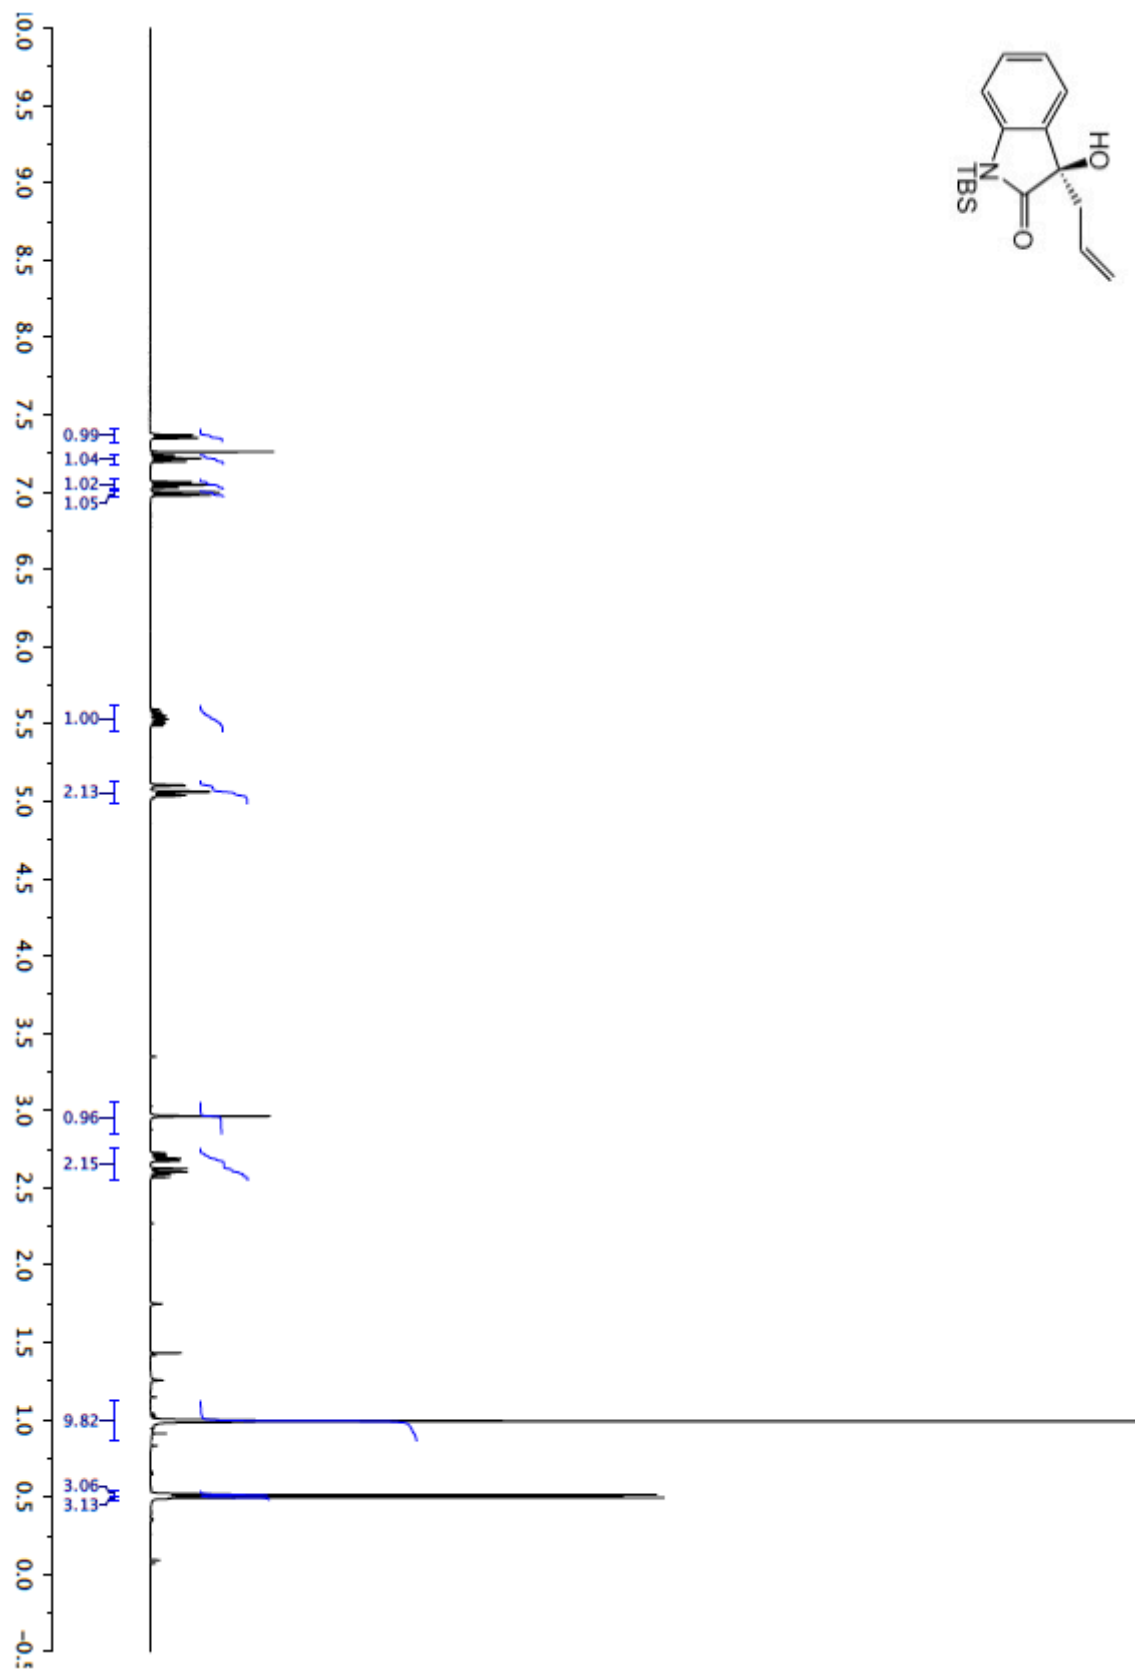



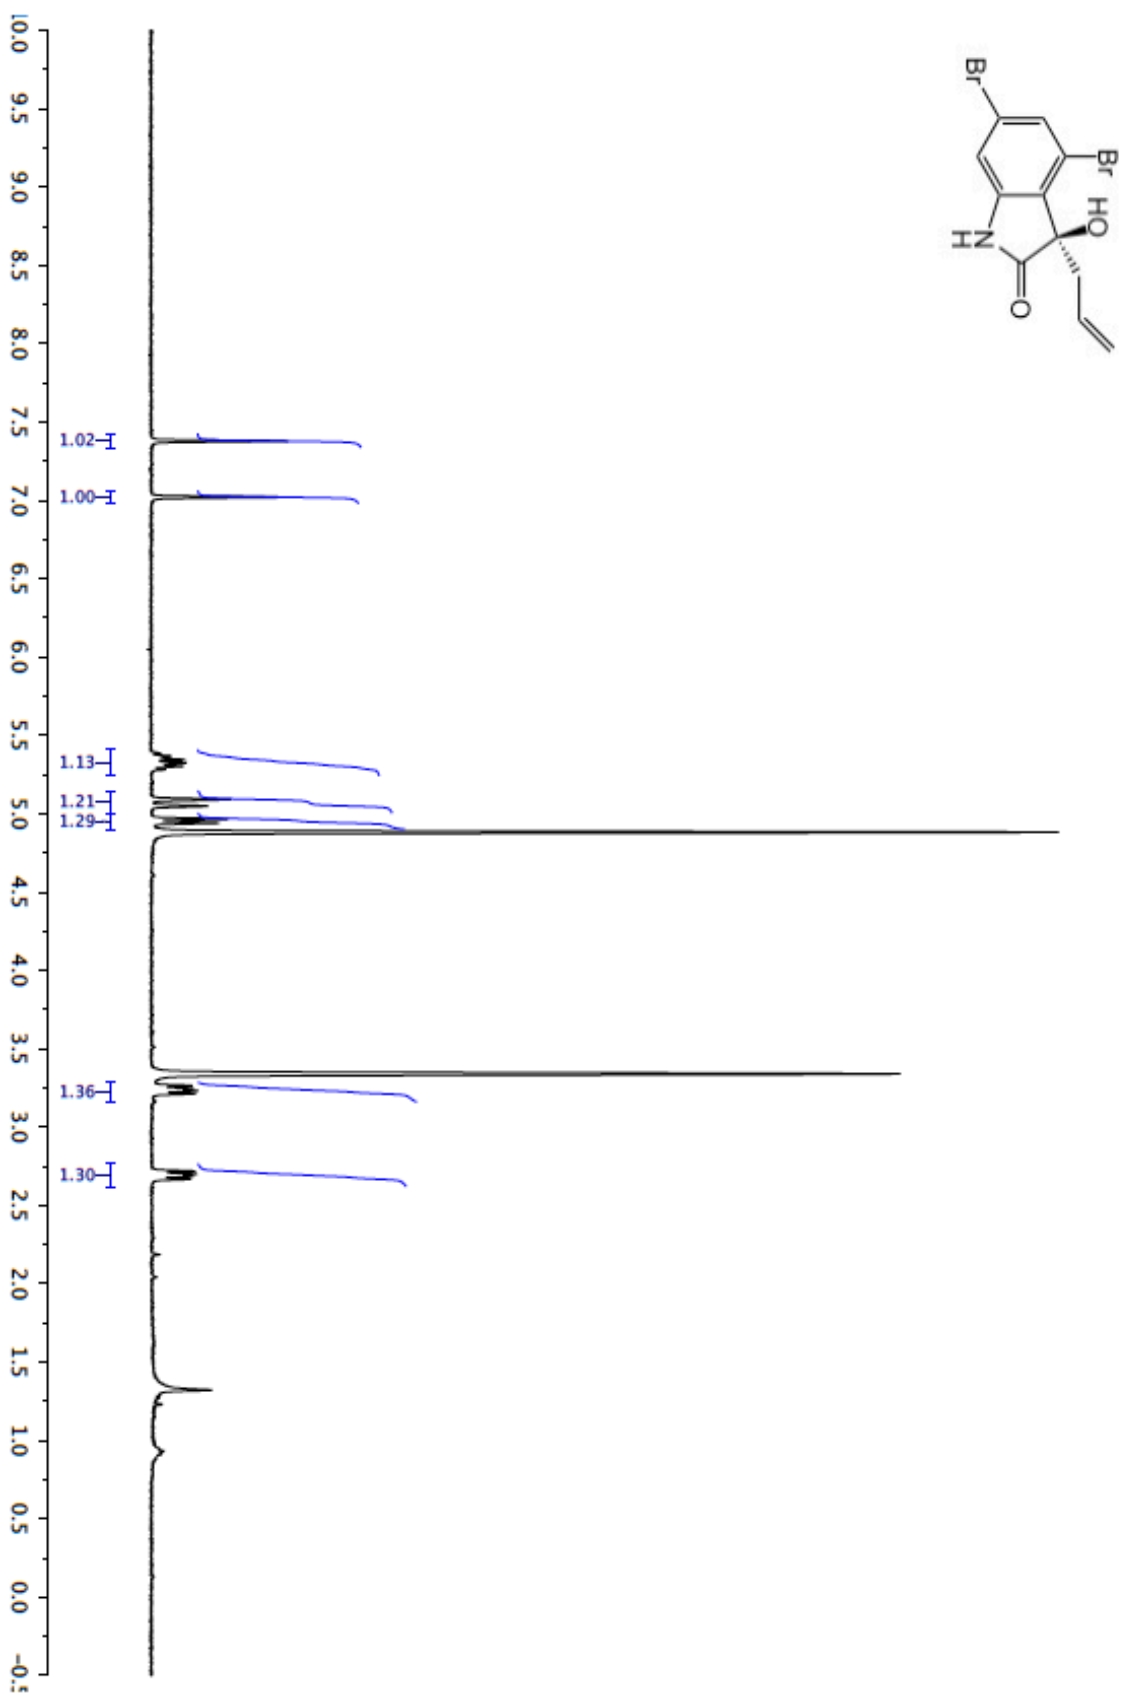

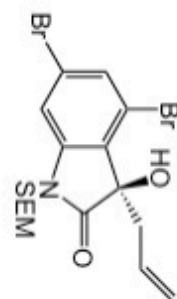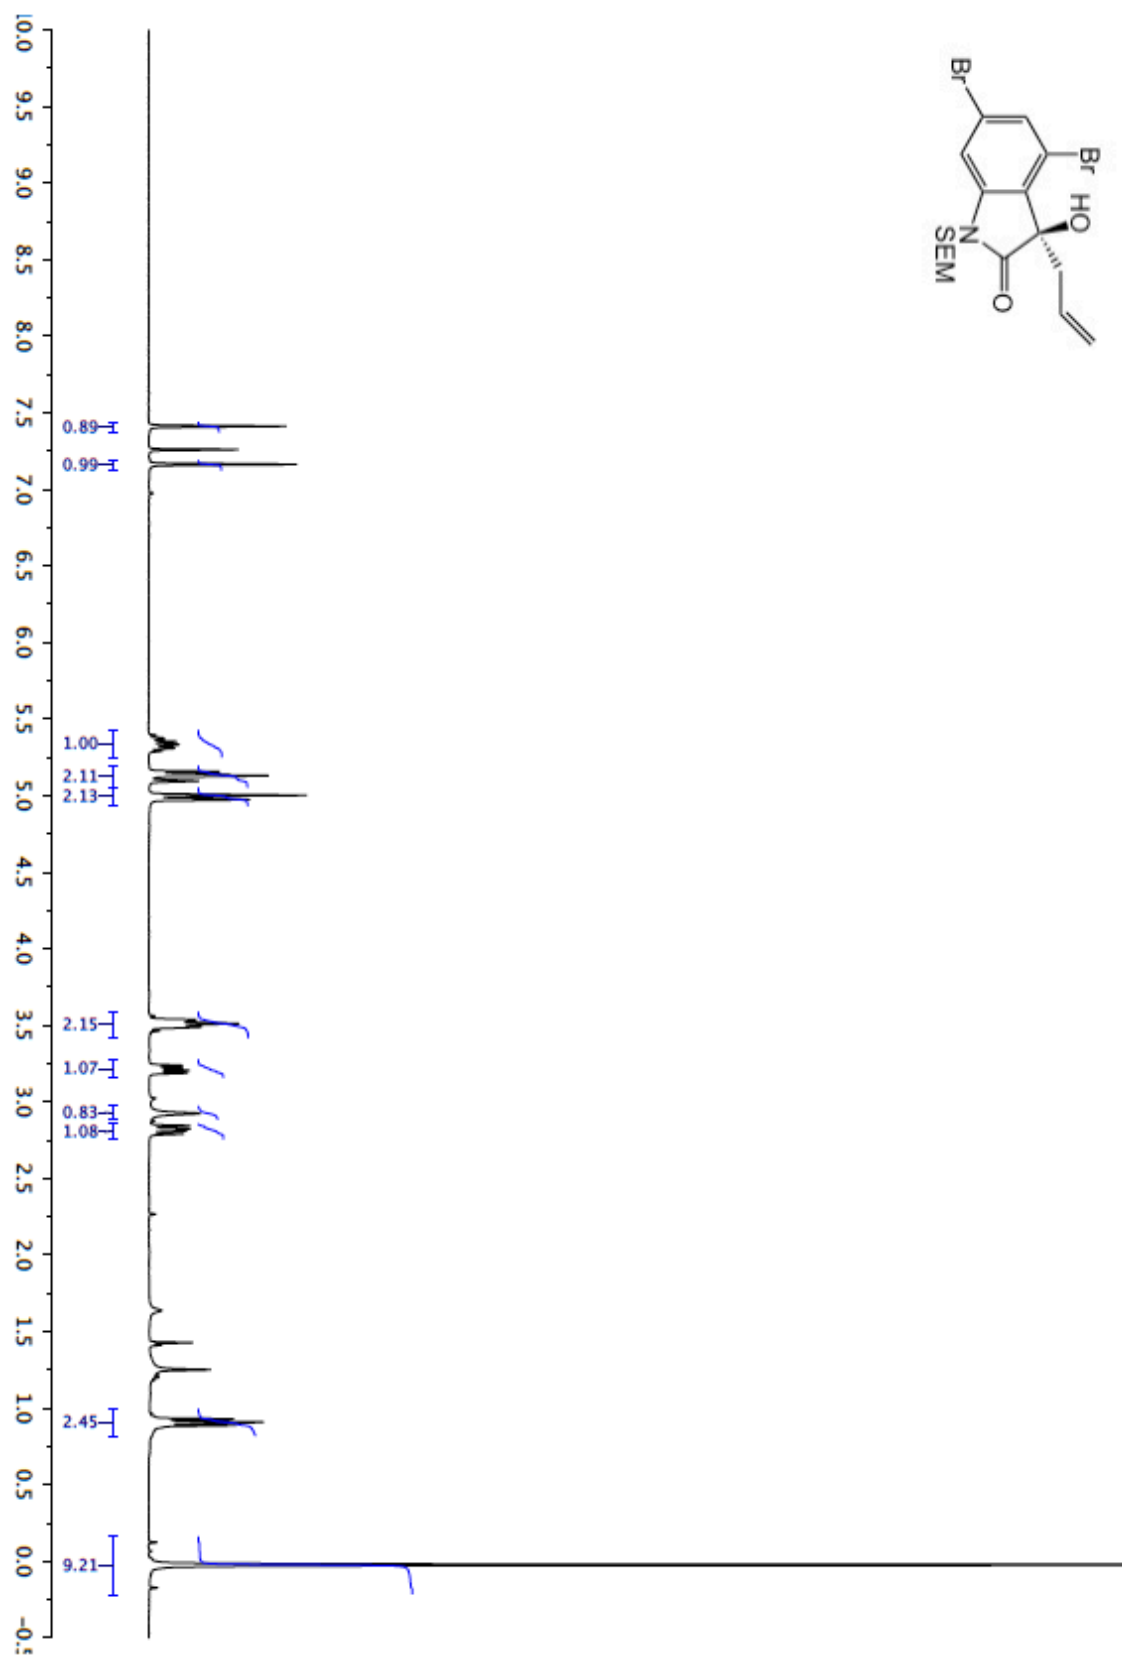

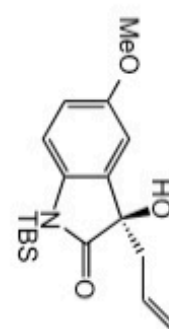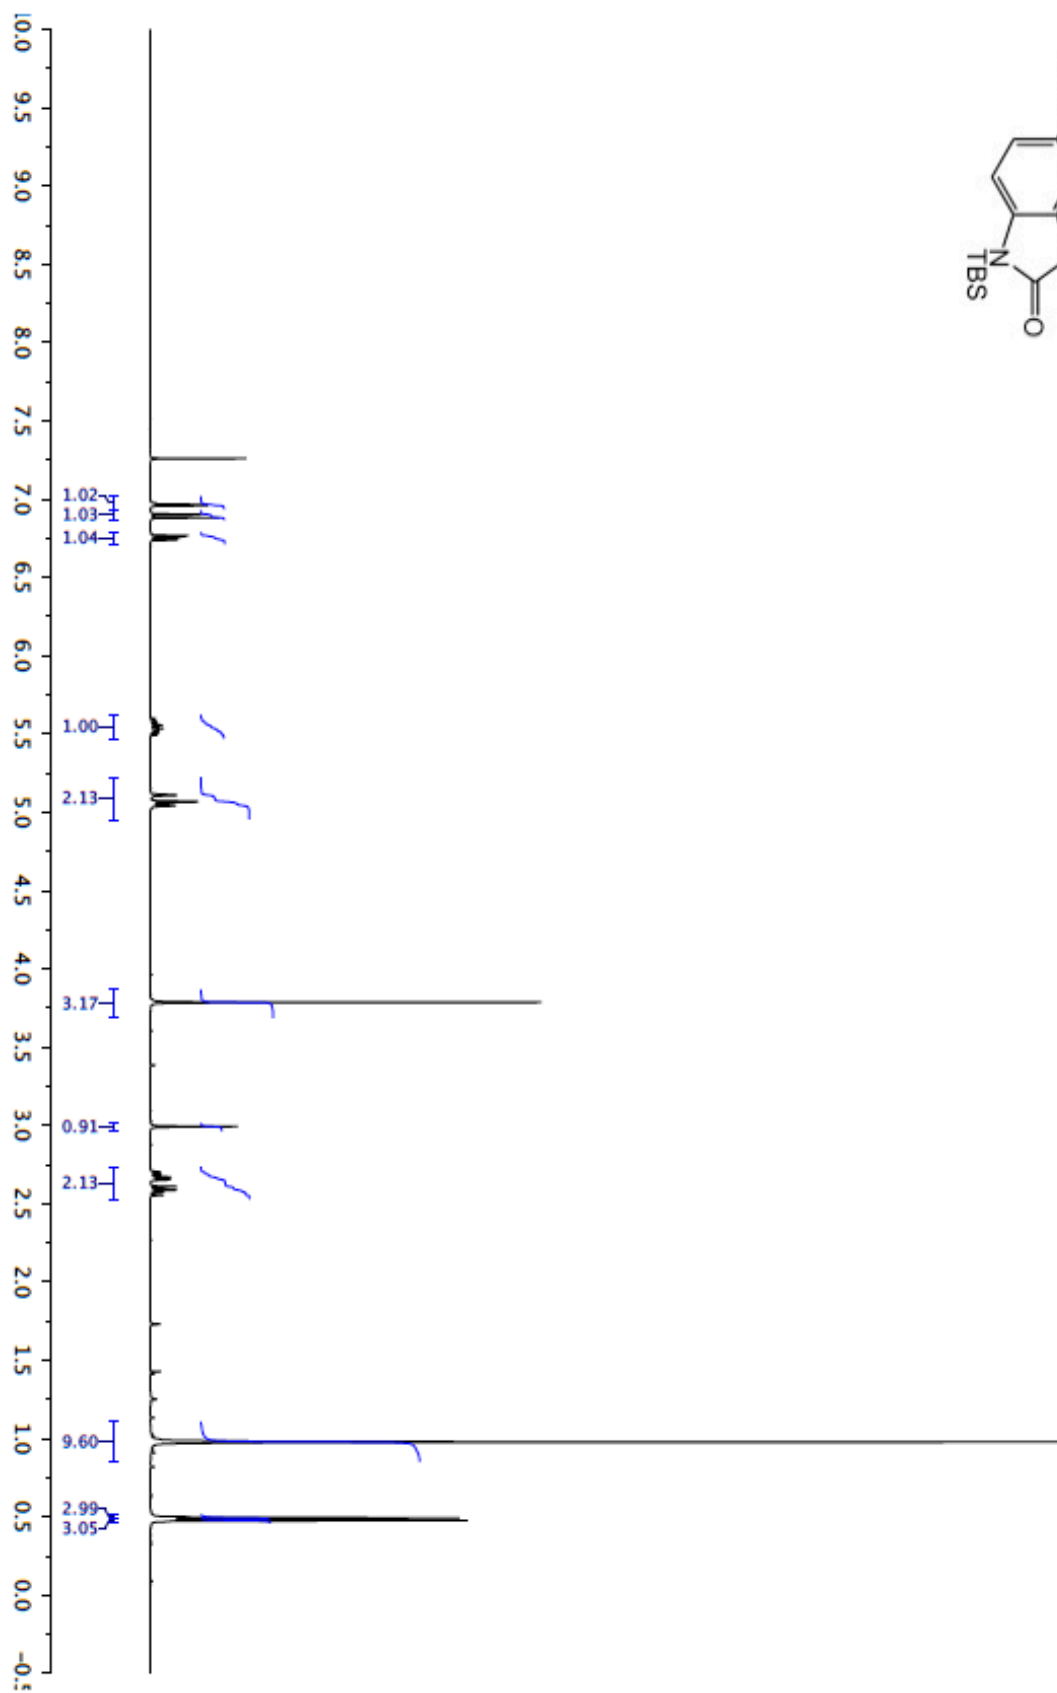

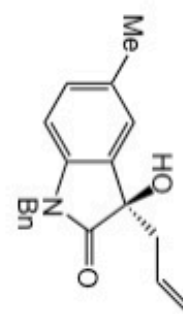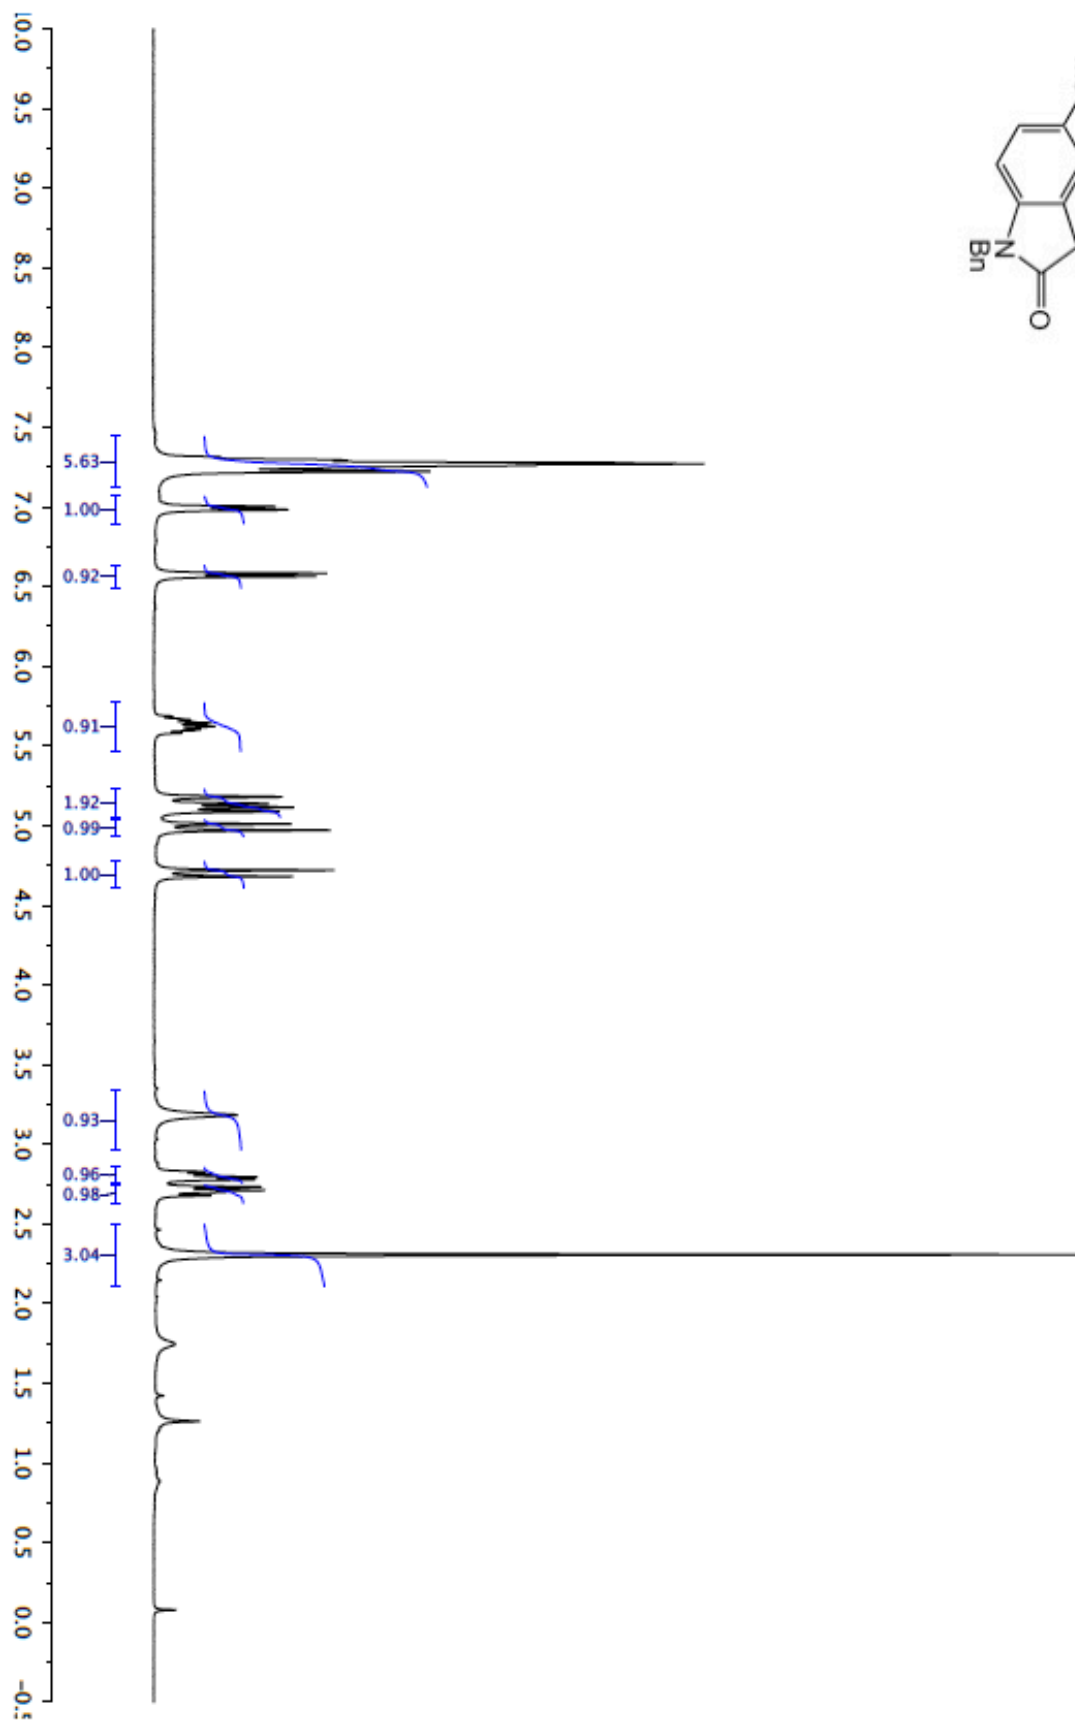

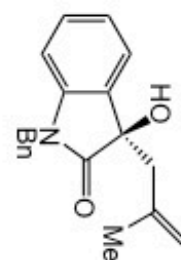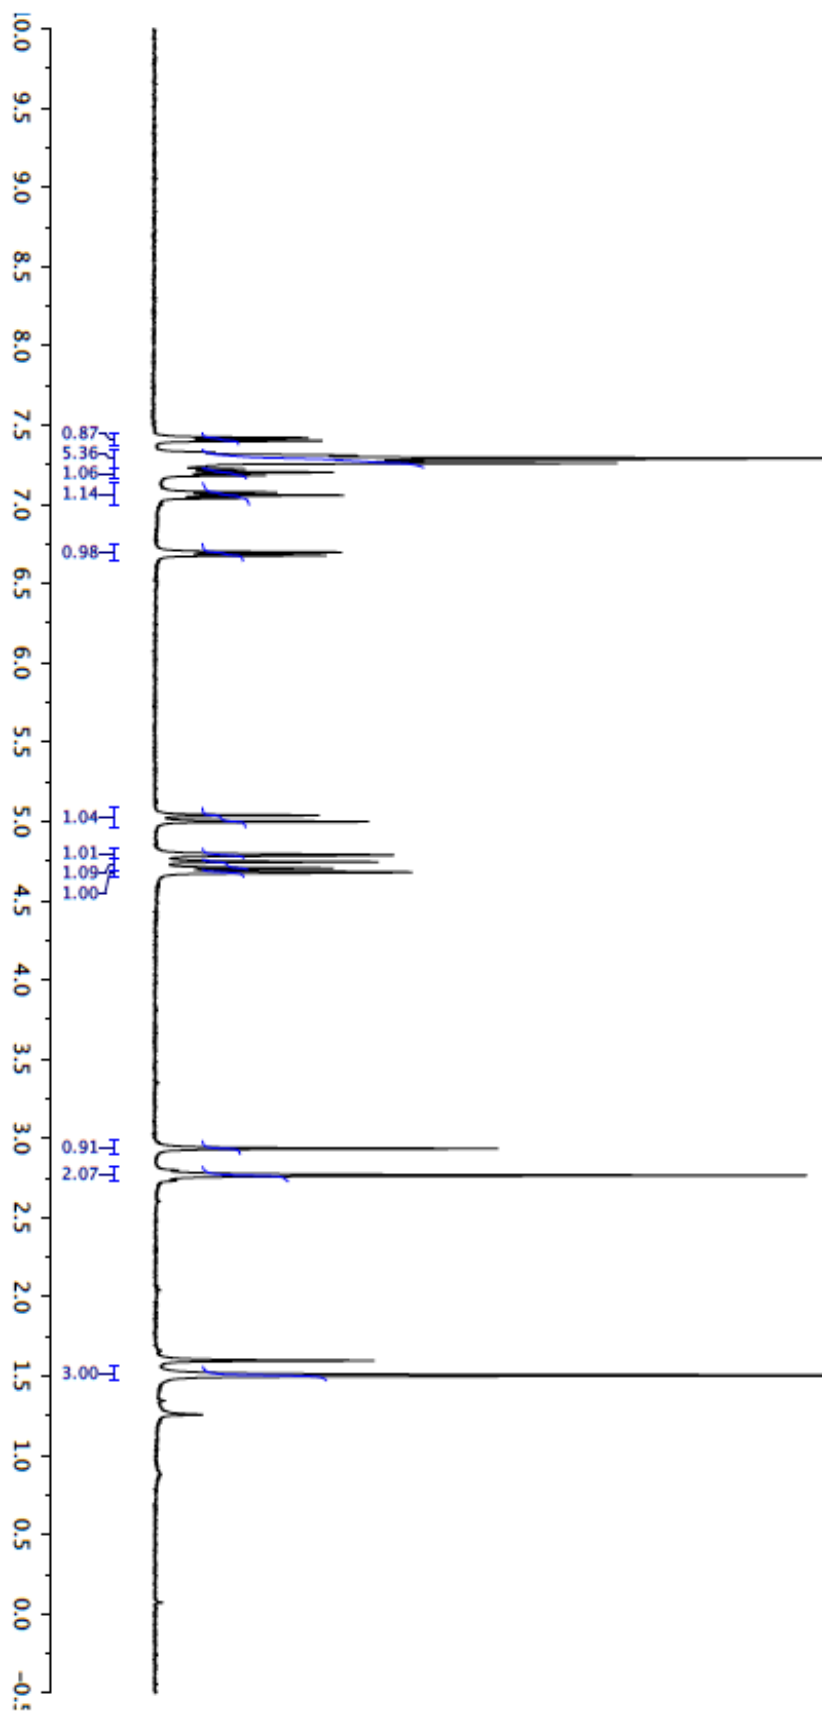

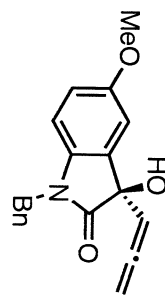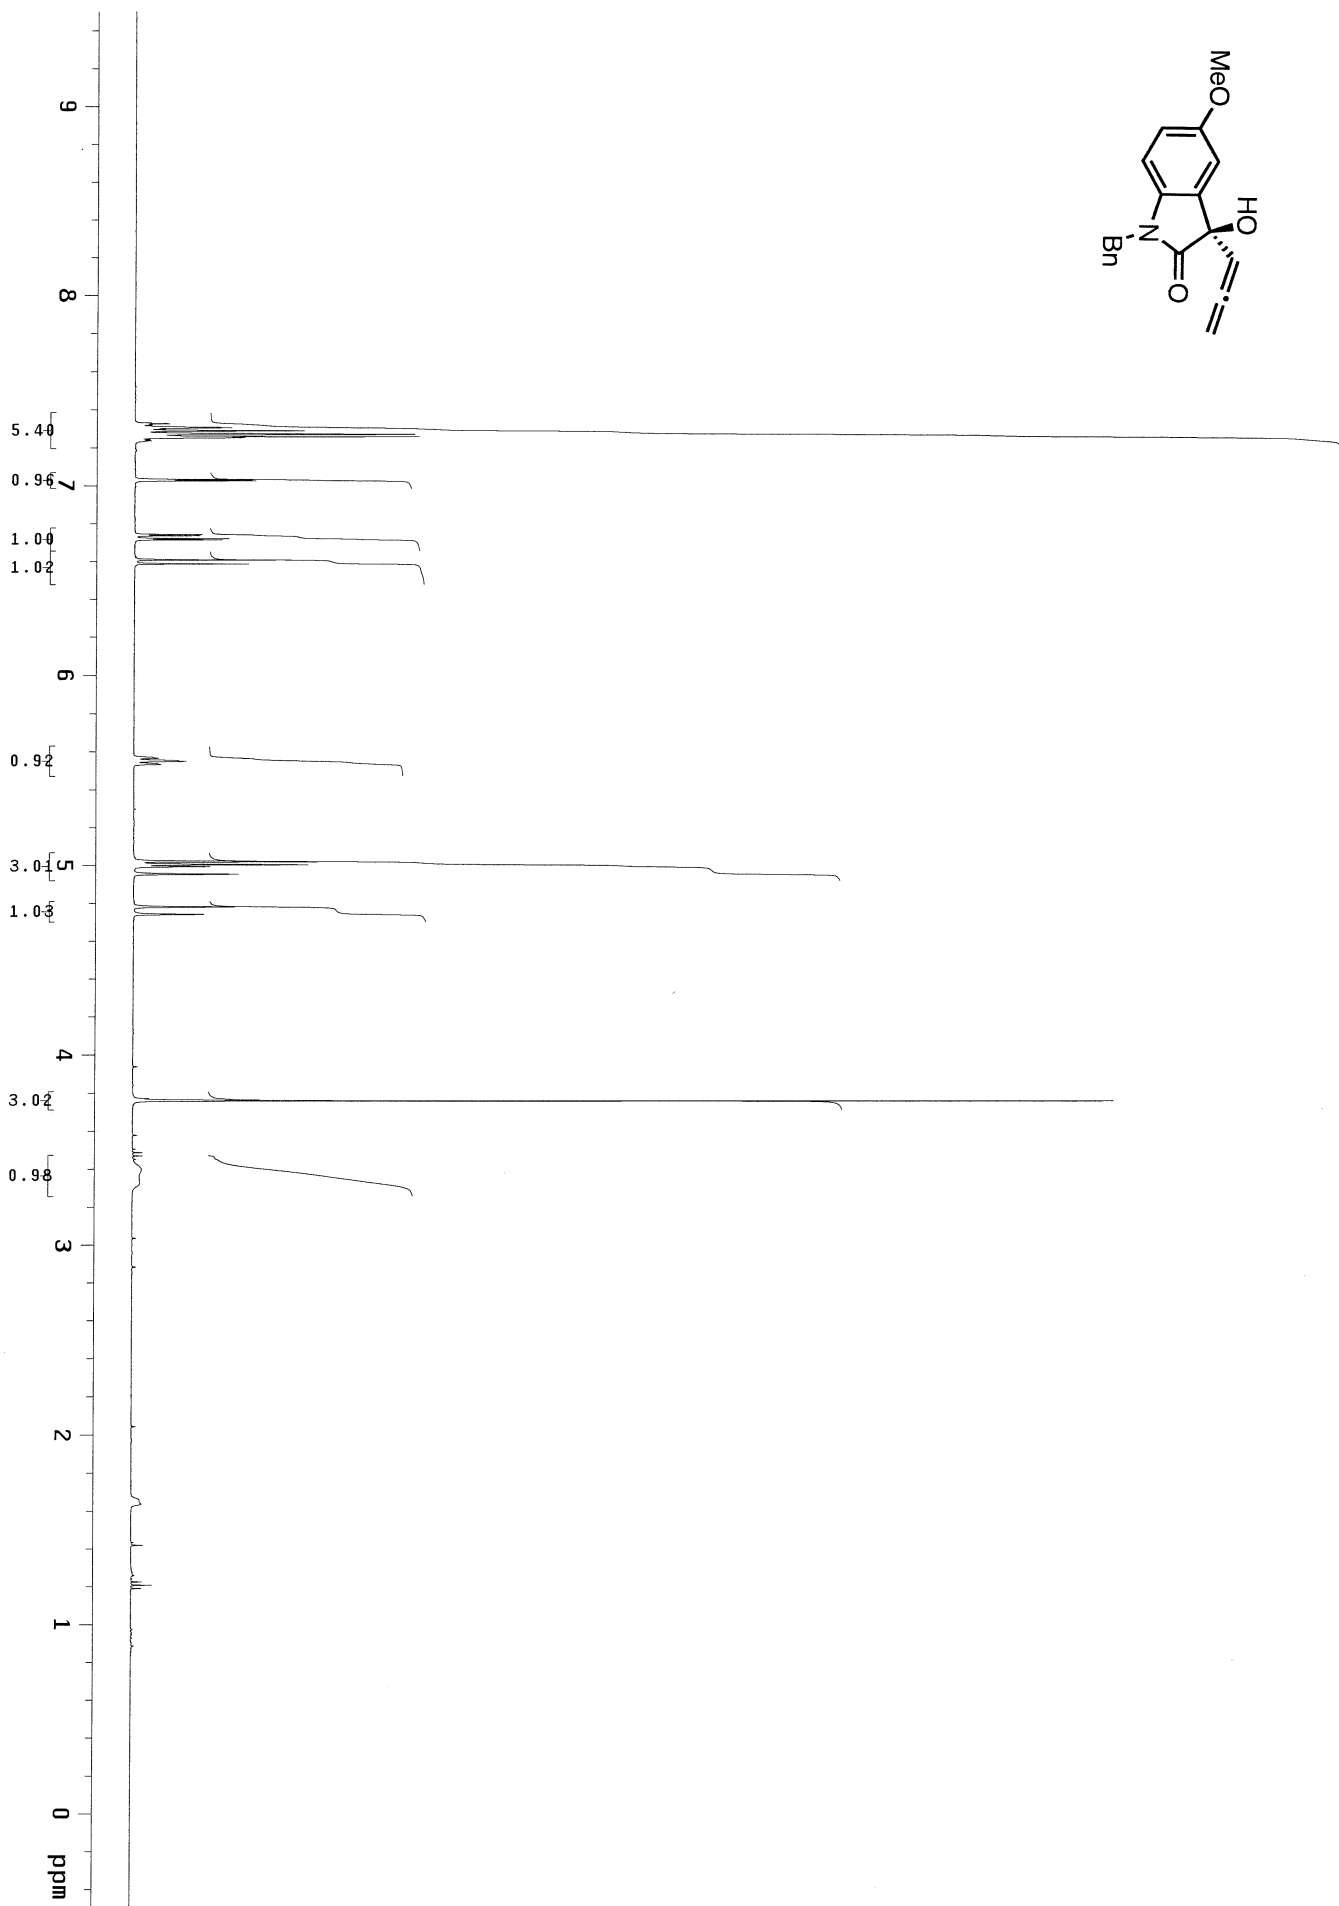

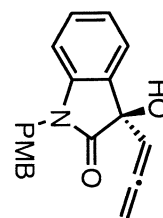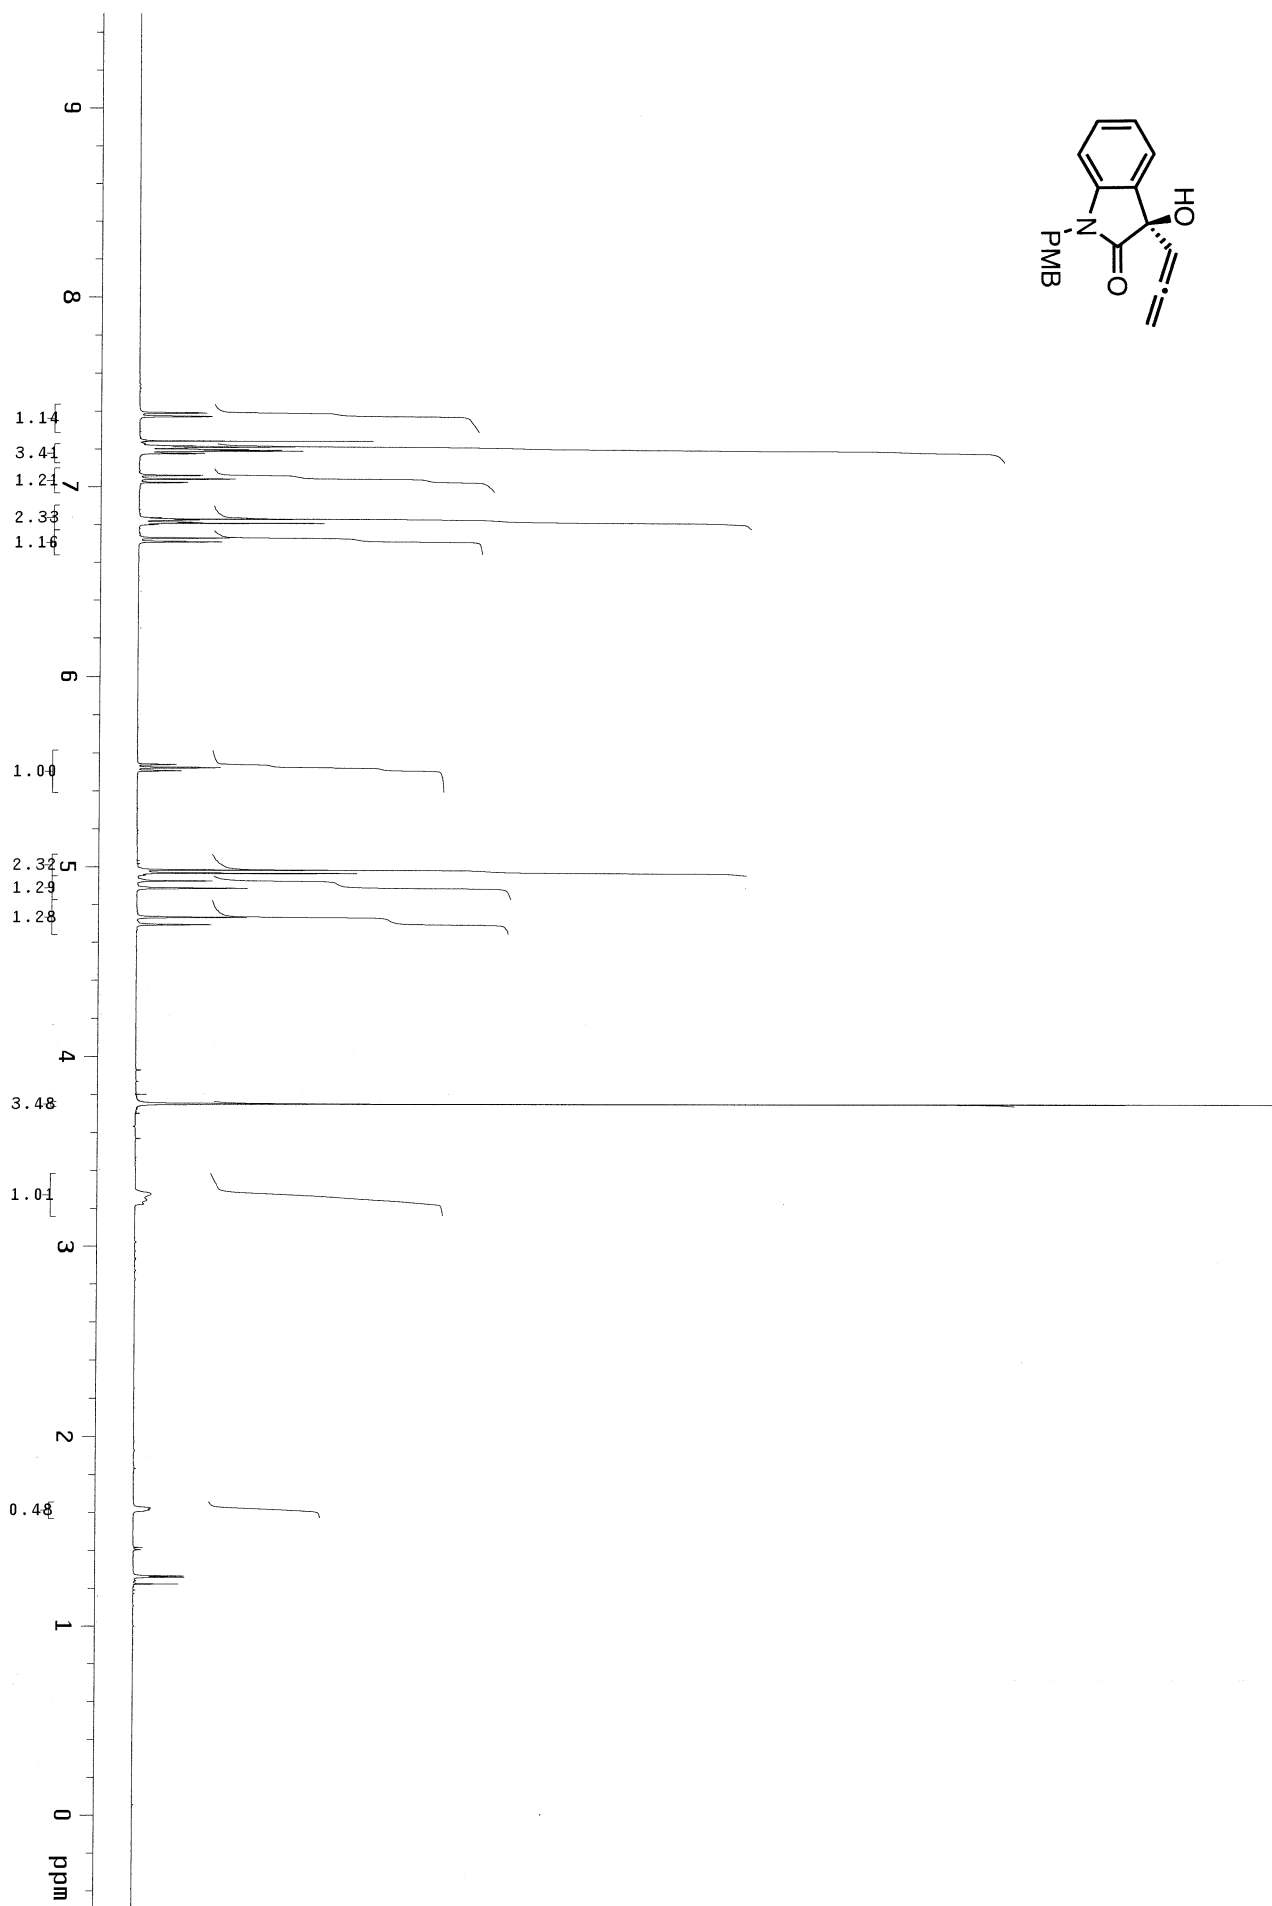

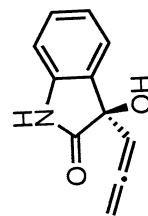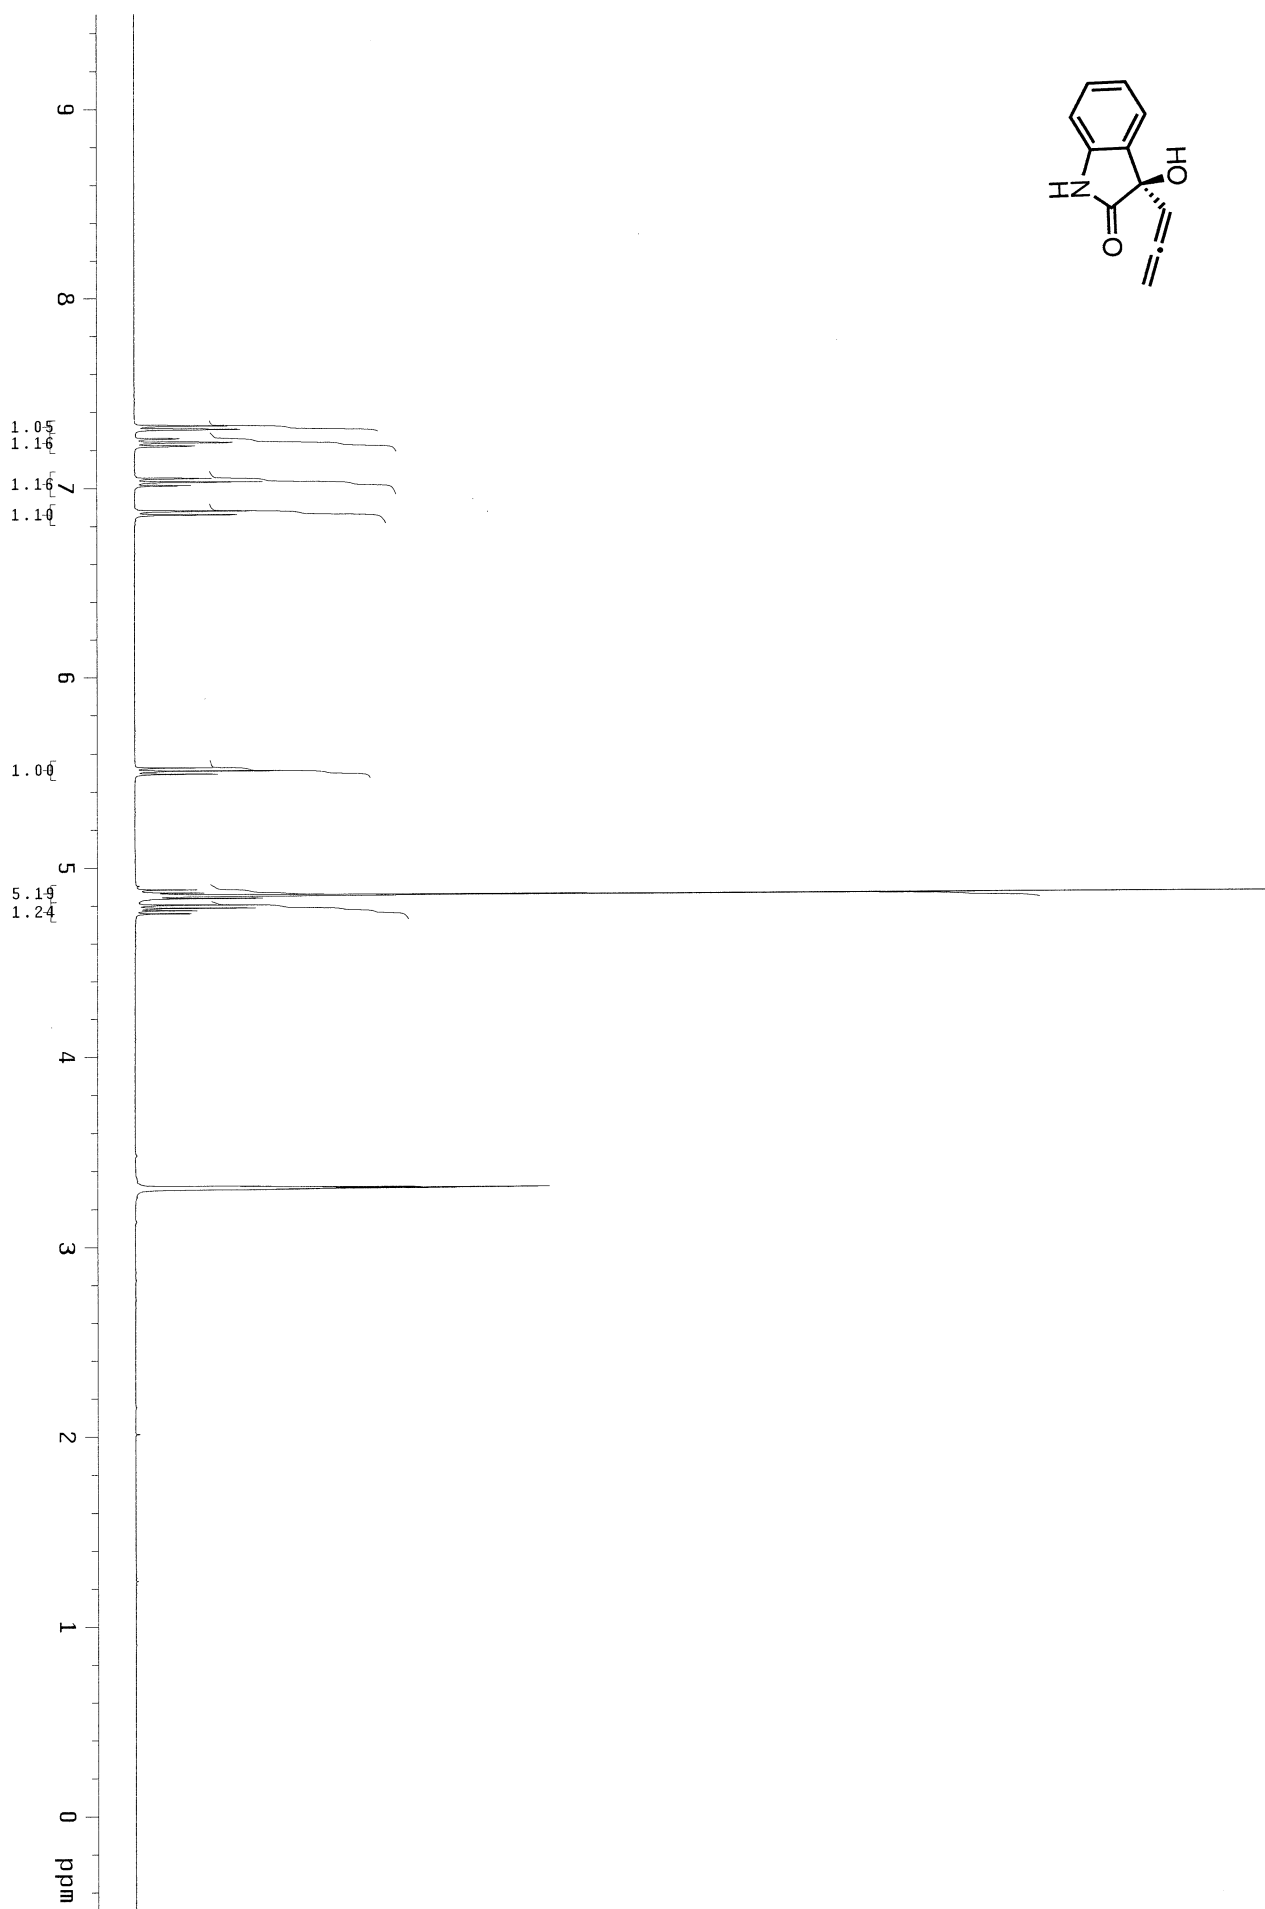



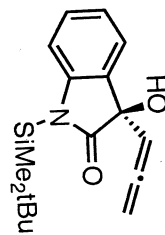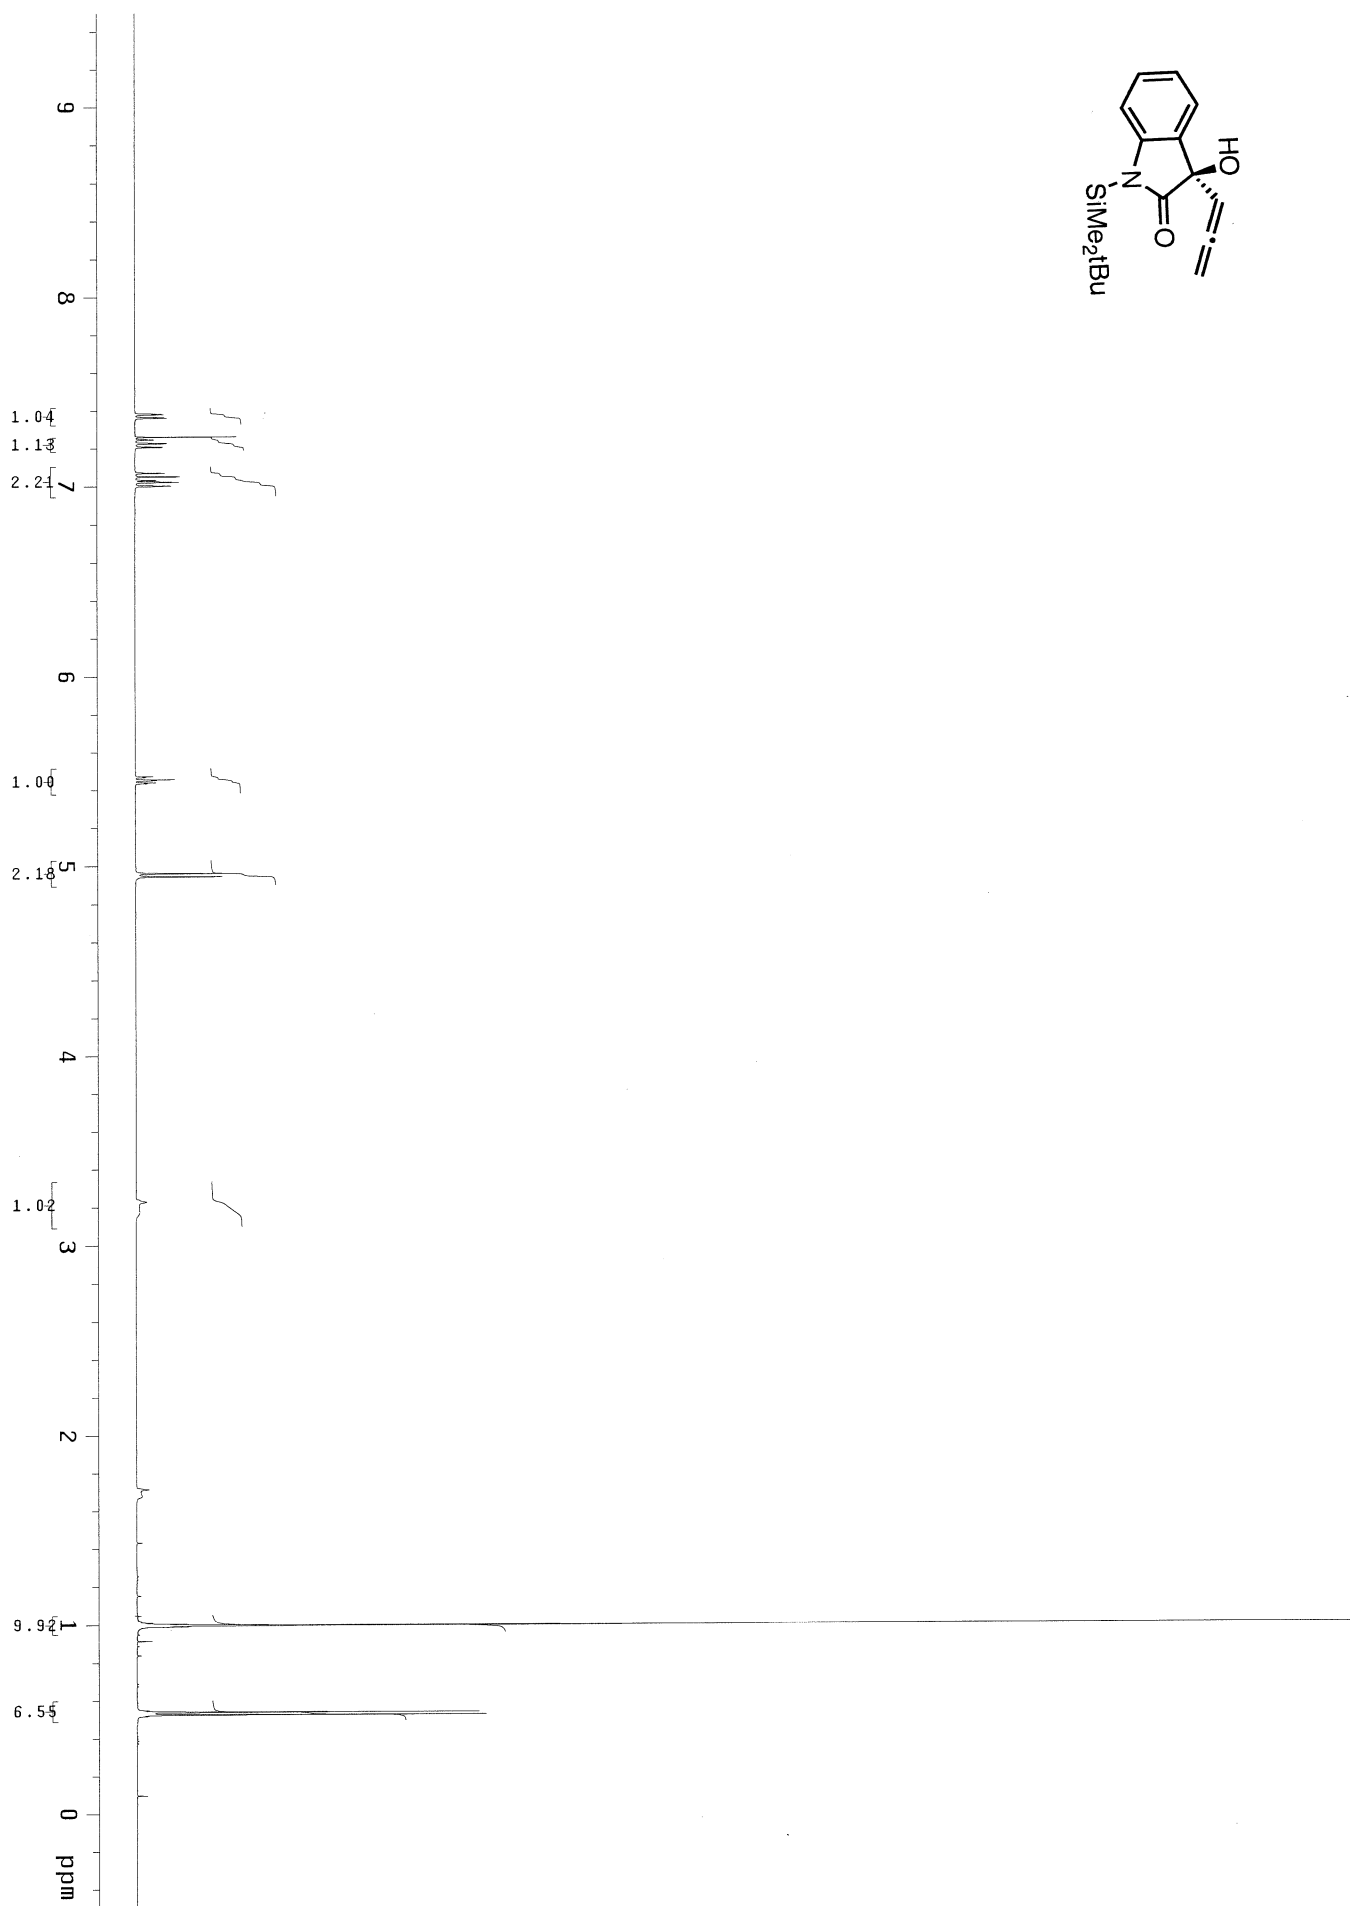

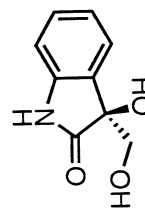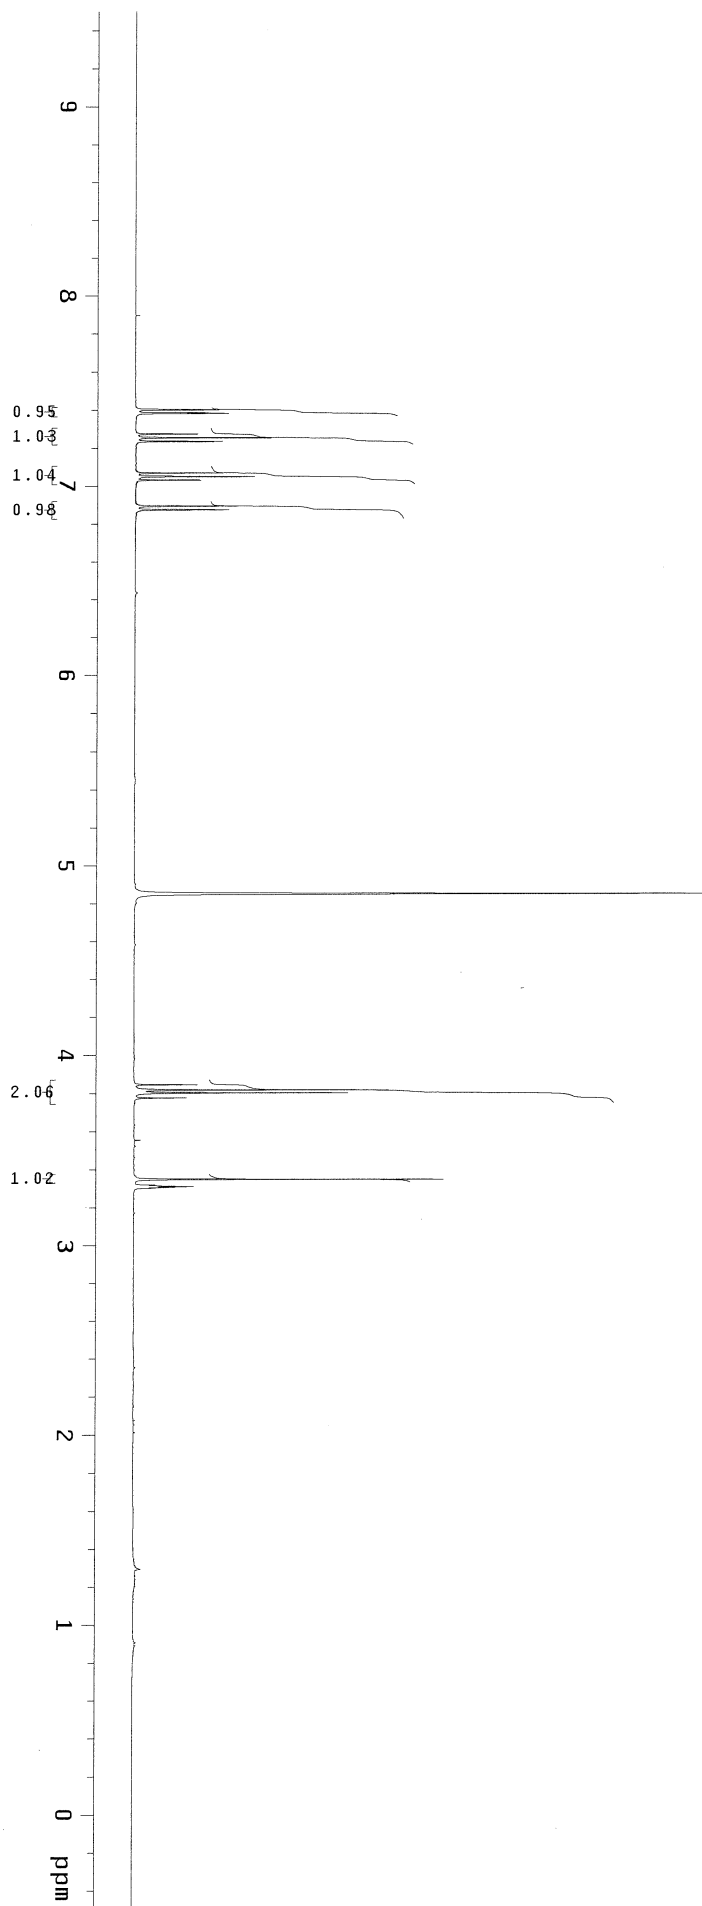

# Simple Organic Molecules as Catalysts for Enantioselective Synthesis of Amines and Alcohols

Daniel L. Silverio, Sebastian Torker, Tatiana Pilyugina, Erika M. Vieira,  
Marc L. Snapper, Fredrik Haeffner & Amir H. Hoveyda\*

*Department of Chemistry, Merkert Chemistry Center, Boston College, Chestnut Hill, Massachusetts 02467*

## SUPPLEMENTARY INFORMATION; PART D

| <i>Table of Contents</i>                                               | <i>Page</i> |
|------------------------------------------------------------------------|-------------|
| <i>X-ray Crystal Structure of Protonated Aminophenol <b>2g</b>•HCl</i> | S144        |
| <i>X-ray Crystal Structure of Aminophenol <b>2g</b></i>                | S169        |
| <i>X-ray Crystal Structure of Homoallylamide <b>S7</b></i>             | S179        |
| <i>X-ray Crystal Structure of Homoallylamide <b>S12</b></i>            | S196        |
| <i>X-ray Crystal Structure of Homoallylamide <b>10</b></i>             | S207        |
| <i>X-ray Crystal Structure of Homoallylamide <b>11</b></i>             | S219        |
| <i>X-ray Crystal Structure of Homoallylamide <b>13</b></i>             | S231        |
| <i>X-ray Crystal Structure of Homoallylic Alcohol <b>15a</b></i>       | S294        |
| <i>X-ray Crystal Structure of Allenyl Alcohol <b>21</b></i>            | S300        |

**X-ray Crystal Structure of 2g•HCl (Not shown in manuscript; see Scheme S1 in Part A of the Supplementary Information)**

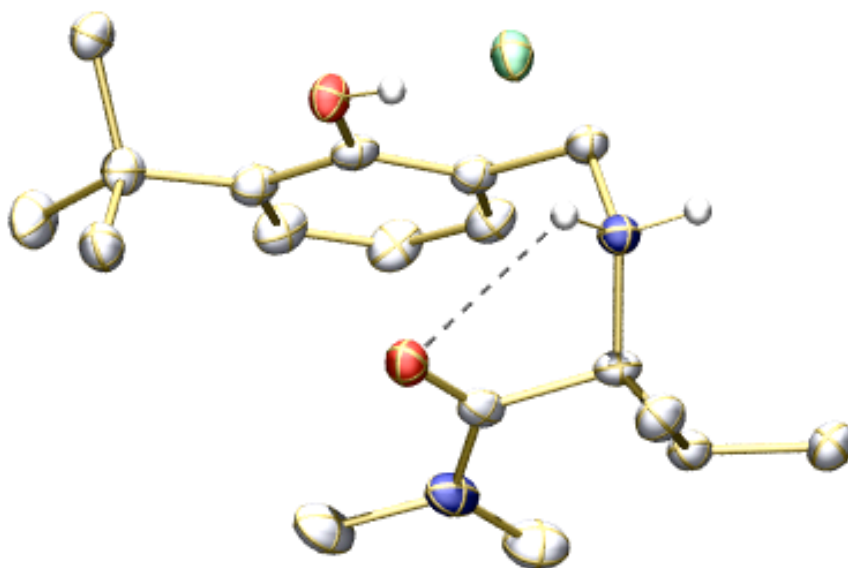

**Table 1. Crystal data and structure refinement for C<sub>18</sub>H<sub>31</sub>N<sub>2</sub>O<sub>2</sub>Cl (2g•HCl)**

|                                 |                                                                  |                |
|---------------------------------|------------------------------------------------------------------|----------------|
| Identification code             | C <sub>18</sub> H <sub>31</sub> N <sub>2</sub> O <sub>2</sub> Cl |                |
| Empirical formula               | C <sub>18</sub> H <sub>31</sub> N <sub>2</sub> O <sub>2</sub> Cl |                |
| Formula weight                  | 342.90                                                           |                |
| Temperature                     | 100(2) K                                                         |                |
| Wavelength                      | 1.54178 Å                                                        |                |
| Crystal system                  | Monoclinic                                                       |                |
| Space group                     | P 21                                                             |                |
| Unit cell dimensions            | a = 8.1015(4) Å                                                  | α = 90°        |
|                                 | b = 21.8686(12) Å                                                | β = 91.738(3)° |
|                                 | c = 16.8521(9) Å                                                 | γ = 90°        |
| Volume                          | 2984.3(3) Å <sup>3</sup>                                         |                |
| Z                               | 6                                                                |                |
| Density (calculated)            | 1.145 Mg/m <sup>3</sup>                                          |                |
| Absorption coefficient          | 1.776 mm <sup>-1</sup>                                           |                |
| F(000)                          | 1116                                                             |                |
| Crystal size                    | 0.15 x 0.09 x 0.03 mm <sup>3</sup>                               |                |
| Theta range for data collection | 2.62 to 67.29°                                                   |                |
| Index ranges                    | -6 ≤ h ≤ 9, -25 ≤ k ≤ 26, -20 ≤ l ≤ 20                           |                |
| Reflections collected           | 25872                                                            |                |

|                                   |                                             |
|-----------------------------------|---------------------------------------------|
| Independent reflections           | 9770 [R(int) = 0.0418]                      |
| Completeness to theta = 67.29°    | 98.9 %                                      |
| Absorption correction             | Semi-empirical from equivalents             |
| Max. and min. transmission        | 0.9487 and 0.7765                           |
| Refinement method                 | Full-matrix least-squares on F <sup>2</sup> |
| Data / restraints / parameters    | 9770 / 10 / 655                             |
| Goodness-of-fit on F <sup>2</sup> | 1.024                                       |
| Final R indices [I>2sigma(I)]     | R1 = 0.0379, wR2 = 0.0921                   |
| R indices (all data)              | R1 = 0.0440, wR2 = 0.0956                   |
| Absolute structure parameter      | 0.012(9)                                    |
| Extinction coefficient            | na                                          |
| Largest diff. peak and hole       | 0.280 and -0.175 e.Å <sup>-3</sup>          |

**Table 2. Atomic coordinates ( x 10<sup>4</sup>) and equivalent isotropic displacement parameters (Å<sup>2</sup> x 10<sup>3</sup>) for C<sub>18</sub>H<sub>31</sub>N<sub>2</sub>O<sub>2</sub>Cl (2g•HCl). U(eq) is defined as one third of the trace of the orthogonalized U<sup>ij</sup> tensor.**

|       | x       | y       | z       | U(eq) |
|-------|---------|---------|---------|-------|
| Cl(1) | 5873(1) | 4279(1) | 5833(1) | 26(1) |
| O(1)  | 4388(2) | 5077(1) | 7714(1) | 26(1) |
| O(2)  | 7895(2) | 4751(1) | 7289(1) | 24(1) |
| N(1)  | 3799(3) | 5997(1) | 8272(1) | 31(1) |
| N(2)  | 4854(3) | 5570(1) | 6282(1) | 22(1) |
| C(1)  | 4023(3) | 5617(1) | 7649(1) | 24(1) |
| C(2)  | 3712(3) | 5890(1) | 6820(1) | 22(1) |
| C(3)  | 6638(3) | 5780(1) | 6310(1) | 23(1) |
| C(4)  | 7424(3) | 5837(1) | 7132(1) | 23(1) |
| C(5)  | 7982(3) | 5329(1) | 7574(2) | 23(1) |
| C(6)  | 8680(3) | 5404(1) | 8351(2) | 26(1) |
| C(7)  | 8891(3) | 6001(1) | 8622(2) | 32(1) |
| C(8)  | 8415(3) | 6508(1) | 8179(2) | 33(1) |
| C(9)  | 7665(3) | 6425(1) | 7438(2) | 29(1) |
| C(10) | 4175(4) | 5763(2) | 9066(2) | 43(1) |

|       |          |         |         |       |
|-------|----------|---------|---------|-------|
| C(11) | 3392(4)  | 6643(1) | 8206(2) | 41(1) |
| C(12) | 1882(3)  | 5784(1) | 6565(1) | 25(1) |
| C(13) | 1519(3)  | 5118(1) | 6347(2) | 29(1) |
| C(14) | 1342(3)  | 6214(1) | 5893(2) | 31(1) |
| C(15) | 9156(3)  | 4852(1) | 8865(1) | 27(1) |
| C(16) | 10572(3) | 4495(1) | 8491(2) | 29(1) |
| C(17) | 9771(4)  | 5044(1) | 9704(2) | 38(1) |
| C(18) | 7638(3)  | 4443(1) | 8984(2) | 30(1) |
| Cl(2) | 5017(1)  | 2369(1) | 3817(1) | 29(1) |
| O(3)  | 3822(2)  | 1891(1) | 6973(1) | 30(1) |
| O(4)  | 7517(2)  | 1357(1) | 7073(1) | 28(1) |
| N(3)  | 3668(3)  | 2844(1) | 7484(1) | 29(1) |
| N(4)  | 5179(3)  | 2204(1) | 5653(1) | 23(1) |
| C(19) | 3894(3)  | 2444(1) | 6886(2) | 26(1) |
| C(20) | 4168(3)  | 2690(1) | 6045(1) | 23(1) |
| C(21) | 7028(3)  | 2253(1) | 5787(1) | 24(1) |
| C(22) | 7548(3)  | 2410(1) | 6627(1) | 23(1) |
| C(23) | 7721(3)  | 1966(1) | 7228(2) | 24(1) |
| C(24) | 8175(3)  | 2141(1) | 8009(2) | 28(1) |
| C(25) | 8439(4)  | 2760(1) | 8151(2) | 33(1) |
| C(26) | 8292(4)  | 3195(1) | 7560(2) | 34(1) |
| C(27) | 7851(3)  | 3019(1) | 6800(2) | 28(1) |
| C(28) | 3285(4)  | 2597(1) | 8261(2) | 40(1) |
| C(29) | 3913(4)  | 3504(1) | 7467(2) | 33(1) |
| C(30) | 2535(3)  | 2771(1) | 5562(2) | 30(1) |
| C(31) | 1605(4)  | 3334(1) | 5836(2) | 37(1) |
| C(32) | 1460(4)  | 2199(2) | 5555(2) | 40(1) |
| C(33) | 8339(4)  | 1666(1) | 8684(2) | 34(1) |
| C(34) | 6708(4)  | 1328(1) | 8784(2) | 39(1) |
| C(35) | 8804(5)  | 1966(2) | 9481(2) | 50(1) |
| C(36) | 9749(4)  | 1218(1) | 8496(2) | 34(1) |
| Cl(3) | 4499(1)  | 5738(1) | 4422(1) | 26(1) |
| O(5)  | 8331(3)  | 3526(1) | 4414(1) | 41(1) |
| O(6)  | 5415(2)  | 3236(1) | 2436(1) | 30(1) |
| N(5)  | 9467(3)  | 3444(1) | 3206(2) | 38(1) |
| N(6)  | 6261(3)  | 4407(1) | 4024(1) | 26(1) |

|       |          |         |         |       |
|-------|----------|---------|---------|-------|
| C(37) | 8504(4)  | 3720(1) | 3741(2) | 32(1) |
| C(38) | 7667(3)  | 4322(1) | 3490(2) | 29(1) |
| C(39) | 4789(3)  | 4001(1) | 3827(1) | 23(1) |
| C(40) | 4129(3)  | 4130(1) | 2995(1) | 24(1) |
| C(41) | 4489(3)  | 3754(1) | 2345(2) | 24(1) |
| C(42) | 3970(3)  | 3922(1) | 1566(1) | 25(1) |
| C(43) | 3100(3)  | 4465(1) | 1478(2) | 30(1) |
| C(44) | 2711(4)  | 4832(1) | 2115(2) | 34(1) |
| C(45) | 3234(3)  | 4661(1) | 2870(2) | 28(1) |
| C(46) | 10336(5) | 2882(2) | 3432(2) | 53(1) |
| C(47) | 9623(4)  | 3616(2) | 2381(2) | 39(1) |
| C(48) | 8878(4)  | 4867(1) | 3540(2) | 39(1) |
| C(49) | 9494(5)  | 4992(2) | 4386(2) | 61(1) |
| C(50) | 8131(5)  | 5432(2) | 3151(2) | 57(1) |
| C(51) | 4327(4)  | 3517(1) | 846(2)  | 30(1) |
| C(52) | 6180(4)  | 3407(2) | 764(2)  | 41(1) |
| C(53) | 3426(4)  | 2900(1) | 933(2)  | 40(1) |
| C(54) | 3689(4)  | 3812(2) | 66(2)   | 42(1) |

**Table 3. Bond lengths [Å] and angles [°] for C<sub>18</sub>H<sub>31</sub>N<sub>2</sub>O<sub>2</sub>Cl (2g•HCl)**

|            |           |
|------------|-----------|
| O(1)-C(1)  | 1.221(3)  |
| O(2)-C(5)  | 1.354(3)  |
| O(2)-H(2O) | 0.857(18) |
| N(1)-C(1)  | 1.354(3)  |
| N(1)-C(11) | 1.454(4)  |
| N(1)-C(10) | 1.456(4)  |
| N(2)-C(2)  | 1.491(3)  |
| N(2)-C(3)  | 1.517(3)  |
| N(2)-H(1N) | 0.937(17) |
| N(2)-H(2N) | 0.915(17) |
| C(1)-C(2)  | 1.533(3)  |
| C(2)-C(12) | 1.548(3)  |
| C(2)-H(2B) | 1.0000    |

|              |          |
|--------------|----------|
| C(3)-C(4)    | 1.512(3) |
| C(3)-H(3A)   | 0.9900   |
| C(3)-H(3B)   | 0.9900   |
| C(4)-C(9)    | 1.398(4) |
| C(4)-C(5)    | 1.405(3) |
| C(5)-C(6)    | 1.420(3) |
| C(6)-C(7)    | 1.390(4) |
| C(6)-C(15)   | 1.528(3) |
| C(7)-C(8)    | 1.386(4) |
| C(7)-H(7A)   | 0.9500   |
| C(8)-C(9)    | 1.383(4) |
| C(8)-H(8A)   | 0.9500   |
| C(9)-H(9A)   | 0.9500   |
| C(10)-H(10A) | 0.9800   |
| C(10)-H(10B) | 0.9800   |
| C(10)-H(10C) | 0.9800   |
| C(11)-H(11A) | 0.9800   |
| C(11)-H(11B) | 0.9800   |
| C(11)-H(11C) | 0.9800   |
| C(12)-C(14)  | 1.526(3) |
| C(12)-C(13)  | 1.528(3) |
| C(12)-H(12A) | 1.0000   |
| C(13)-H(13A) | 0.9800   |
| C(13)-H(13B) | 0.9800   |
| C(13)-H(13C) | 0.9800   |
| C(14)-H(14A) | 0.9800   |
| C(14)-H(14B) | 0.9800   |
| C(14)-H(14C) | 0.9800   |
| C(15)-C(16)  | 1.539(4) |
| C(15)-C(18)  | 1.540(4) |
| C(15)-C(17)  | 1.542(3) |
| C(16)-H(16A) | 0.9800   |
| C(16)-H(16B) | 0.9800   |
| C(16)-H(16C) | 0.9800   |
| C(17)-H(17A) | 0.9800   |
| C(17)-H(17B) | 0.9800   |



|              |           |
|--------------|-----------|
| C(17)-H(17C) | 0.9800    |
| C(18)-H(18A) | 0.9800    |
| C(18)-H(18B) | 0.9800    |
| C(18)-H(18C) | 0.9800    |
| O(3)-C(19)   | 1.222(3)  |
| O(4)-C(23)   | 1.367(3)  |
| O(4)-H(4O)   | 0.855(18) |
| N(3)-C(19)   | 1.350(3)  |
| N(3)-C(29)   | 1.457(3)  |
| N(3)-C(28)   | 1.458(3)  |
| N(4)-C(20)   | 1.507(3)  |
| N(4)-C(21)   | 1.512(3)  |
| N(4)-H(3N)   | 0.914(17) |
| N(4)-H(4N)   | 0.914(17) |
| C(19)-C(20)  | 1.538(3)  |
| C(20)-C(30)  | 1.542(3)  |
| C(20)-H(20A) | 1.0000    |
| C(21)-C(22)  | 1.505(3)  |
| C(21)-H(21A) | 0.9900    |
| C(21)-H(21B) | 0.9900    |
| C(22)-C(27)  | 1.383(4)  |
| C(22)-C(23)  | 1.407(3)  |
| C(23)-C(24)  | 1.409(4)  |
| C(24)-C(25)  | 1.389(4)  |
| C(24)-C(33)  | 1.543(4)  |
| C(25)-C(26)  | 1.379(4)  |
| C(25)-H(25A) | 0.9500    |
| C(26)-C(27)  | 1.375(4)  |
| C(26)-H(26A) | 0.9500    |
| C(27)-H(27A) | 0.9500    |
| C(28)-H(28A) | 0.9800    |
| C(28)-H(28B) | 0.9800    |
| C(28)-H(28C) | 0.9800    |
| C(29)-H(29A) | 0.9800    |
| C(29)-H(29B) | 0.9800    |
| C(29)-H(29C) | 0.9800    |

|              |           |
|--------------|-----------|
| C(30)-C(31)  | 1.524(4)  |
| C(30)-C(32)  | 1.524(4)  |
| C(30)-H(30A) | 1.0000    |
| C(31)-H(31A) | 0.9800    |
| C(31)-H(31B) | 0.9800    |
| C(31)-H(31C) | 0.9800    |
| C(32)-H(32A) | 0.9800    |
| C(32)-H(32B) | 0.9800    |
| C(32)-H(32C) | 0.9800    |
| C(33)-C(34)  | 1.528(4)  |
| C(33)-C(35)  | 1.531(4)  |
| C(33)-C(36)  | 1.545(4)  |
| C(34)-H(34A) | 0.9800    |
| C(34)-H(34B) | 0.9800    |
| C(34)-H(34C) | 0.9800    |
| C(35)-H(35A) | 0.9800    |
| C(35)-H(35B) | 0.9800    |
| C(35)-H(35C) | 0.9800    |
| C(36)-H(36A) | 0.9800    |
| C(36)-H(36B) | 0.9800    |
| C(36)-H(36C) | 0.9800    |
| O(5)-C(37)   | 1.223(4)  |
| O(6)-C(41)   | 1.363(3)  |
| O(6)-H(6O)   | 0.851(18) |
| N(5)-C(37)   | 1.353(4)  |
| N(5)-C(47)   | 1.449(4)  |
| N(5)-C(46)   | 1.460(4)  |
| N(6)-C(38)   | 1.485(4)  |
| N(6)-C(39)   | 1.516(3)  |
| N(6)-H(5N)   | 0.909(17) |
| N(6)-H(6N)   | 0.925(17) |
| C(37)-C(38)  | 1.533(4)  |
| C(38)-C(48)  | 1.544(4)  |
| C(38)-H(38A) | 1.0000    |
| C(39)-C(40)  | 1.512(3)  |
| C(39)-H(39A) | 0.9900    |

|              |          |
|--------------|----------|
| C(39)-H(39B) | 0.9900   |
| C(40)-C(45)  | 1.380(3) |
| C(40)-C(41)  | 1.408(4) |
| C(41)-C(42)  | 1.416(3) |
| C(42)-C(43)  | 1.386(4) |
| C(42)-C(51)  | 1.536(3) |
| C(43)-C(44)  | 1.384(4) |
| C(43)-H(43A) | 0.9500   |
| C(44)-C(45)  | 1.381(4) |
| C(44)-H(44A) | 0.9500   |
| C(45)-H(45A) | 0.9500   |
| C(46)-H(46A) | 0.9800   |
| C(46)-H(46B) | 0.9800   |
| C(46)-H(46C) | 0.9800   |
| C(47)-H(47A) | 0.9800   |
| C(47)-H(47B) | 0.9800   |
| C(47)-H(47C) | 0.9800   |
| C(48)-C(50)  | 1.518(5) |
| C(48)-C(49)  | 1.521(4) |
| C(48)-H(48A) | 1.0000   |
| C(49)-H(49A) | 0.9800   |
| C(49)-H(49B) | 0.9800   |
| C(49)-H(49C) | 0.9800   |
| C(50)-H(50A) | 0.9800   |
| C(50)-H(50B) | 0.9800   |
| C(50)-H(50C) | 0.9800   |
| C(51)-C(52)  | 1.530(4) |
| C(51)-C(54)  | 1.538(4) |
| C(51)-C(53)  | 1.545(4) |
| C(52)-H(52A) | 0.9800   |
| C(52)-H(52B) | 0.9800   |
| C(52)-H(52C) | 0.9800   |
| C(53)-H(53A) | 0.9800   |
| C(53)-H(53B) | 0.9800   |
| C(53)-H(53C) | 0.9800   |
| C(54)-H(54A) | 0.9800   |

|                  |            |
|------------------|------------|
| C(54)-H(54B)     | 0.9800     |
| C(54)-H(54C)     | 0.9800     |
| C(5)-O(2)-H(2O)  | 116(2)     |
| C(1)-N(1)-C(11)  | 124.9(2)   |
| C(1)-N(1)-C(10)  | 117.9(2)   |
| C(11)-N(1)-C(10) | 116.9(2)   |
| C(2)-N(2)-C(3)   | 116.52(19) |
| C(2)-N(2)-H(1N)  | 111.0(18)  |
| C(3)-N(2)-H(1N)  | 106.0(18)  |
| C(2)-N(2)-H(2N)  | 113.3(18)  |
| C(3)-N(2)-H(2N)  | 104.4(19)  |
| H(1N)-N(2)-H(2N) | 105(2)     |
| O(1)-C(1)-N(1)   | 124.1(2)   |
| O(1)-C(1)-C(2)   | 119.4(2)   |
| N(1)-C(1)-C(2)   | 116.4(2)   |
| N(2)-C(2)-C(1)   | 106.47(19) |
| N(2)-C(2)-C(12)  | 111.52(19) |
| C(1)-C(2)-C(12)  | 108.9(2)   |
| N(2)-C(2)-H(2B)  | 110.0      |
| C(1)-C(2)-H(2B)  | 110.0      |
| C(12)-C(2)-H(2B) | 110.0      |
| C(4)-C(3)-N(2)   | 115.37(19) |
| C(4)-C(3)-H(3A)  | 108.4      |
| N(2)-C(3)-H(3A)  | 108.4      |
| C(4)-C(3)-H(3B)  | 108.4      |
| N(2)-C(3)-H(3B)  | 108.4      |
| H(3A)-C(3)-H(3B) | 107.5      |
| C(9)-C(4)-C(5)   | 119.5(2)   |
| C(9)-C(4)-C(3)   | 117.6(2)   |
| C(5)-C(4)-C(3)   | 122.7(2)   |
| O(2)-C(5)-C(4)   | 122.5(2)   |
| O(2)-C(5)-C(6)   | 116.8(2)   |
| C(4)-C(5)-C(6)   | 120.6(2)   |
| C(7)-C(6)-C(5)   | 117.0(2)   |
| C(7)-C(6)-C(15)  | 121.9(2)   |

|                     |          |
|---------------------|----------|
| C(5)-C(6)-C(15)     | 121.1(2) |
| C(8)-C(7)-C(6)      | 123.0(2) |
| C(8)-C(7)-H(7A)     | 118.5    |
| C(6)-C(7)-H(7A)     | 118.5    |
| C(9)-C(8)-C(7)      | 119.2(2) |
| C(9)-C(8)-H(8A)     | 120.4    |
| C(7)-C(8)-H(8A)     | 120.4    |
| C(8)-C(9)-C(4)      | 120.5(2) |
| C(8)-C(9)-H(9A)     | 119.8    |
| C(4)-C(9)-H(9A)     | 119.8    |
| N(1)-C(10)-H(10A)   | 109.5    |
| N(1)-C(10)-H(10B)   | 109.5    |
| H(10A)-C(10)-H(10B) | 109.5    |
| N(1)-C(10)-H(10C)   | 109.5    |
| H(10A)-C(10)-H(10C) | 109.5    |
| H(10B)-C(10)-H(10C) | 109.5    |
| N(1)-C(11)-H(11A)   | 109.5    |
| N(1)-C(11)-H(11B)   | 109.5    |
| H(11A)-C(11)-H(11B) | 109.5    |
| N(1)-C(11)-H(11C)   | 109.5    |
| H(11A)-C(11)-H(11C) | 109.5    |
| H(11B)-C(11)-H(11C) | 109.5    |
| C(14)-C(12)-C(13)   | 111.1(2) |
| C(14)-C(12)-C(2)    | 111.4(2) |
| C(13)-C(12)-C(2)    | 112.7(2) |
| C(14)-C(12)-H(12A)  | 107.1    |
| C(13)-C(12)-H(12A)  | 107.1    |
| C(2)-C(12)-H(12A)   | 107.1    |
| C(12)-C(13)-H(13A)  | 109.5    |
| C(12)-C(13)-H(13B)  | 109.5    |
| H(13A)-C(13)-H(13B) | 109.5    |
| C(12)-C(13)-H(13C)  | 109.5    |
| H(13A)-C(13)-H(13C) | 109.5    |
| H(13B)-C(13)-H(13C) | 109.5    |
| C(12)-C(14)-H(14A)  | 109.5    |
| C(12)-C(14)-H(14B)  | 109.5    |

|                     |            |
|---------------------|------------|
| H(14A)-C(14)-H(14B) | 109.5      |
| C(12)-C(14)-H(14C)  | 109.5      |
| H(14A)-C(14)-H(14C) | 109.5      |
| H(14B)-C(14)-H(14C) | 109.5      |
| C(6)-C(15)-C(16)    | 110.3(2)   |
| C(6)-C(15)-C(18)    | 110.2(2)   |
| C(16)-C(15)-C(18)   | 111.4(2)   |
| C(6)-C(15)-C(17)    | 111.9(2)   |
| C(16)-C(15)-C(17)   | 106.8(2)   |
| C(18)-C(15)-C(17)   | 106.1(2)   |
| C(15)-C(16)-H(16A)  | 109.5      |
| C(15)-C(16)-H(16B)  | 109.5      |
| H(16A)-C(16)-H(16B) | 109.5      |
| C(15)-C(16)-H(16C)  | 109.5      |
| H(16A)-C(16)-H(16C) | 109.5      |
| H(16B)-C(16)-H(16C) | 109.5      |
| C(15)-C(17)-H(17A)  | 109.5      |
| C(15)-C(17)-H(17B)  | 109.5      |
| H(17A)-C(17)-H(17B) | 109.5      |
| C(15)-C(17)-H(17C)  | 109.5      |
| H(17A)-C(17)-H(17C) | 109.5      |
| H(17B)-C(17)-H(17C) | 109.5      |
| C(15)-C(18)-H(18A)  | 109.5      |
| C(15)-C(18)-H(18B)  | 109.5      |
| H(18A)-C(18)-H(18B) | 109.5      |
| C(15)-C(18)-H(18C)  | 109.5      |
| H(18A)-C(18)-H(18C) | 109.5      |
| H(18B)-C(18)-H(18C) | 109.5      |
| C(23)-O(4)-H(4O)    | 113(2)     |
| C(19)-N(3)-C(29)    | 127.2(2)   |
| C(19)-N(3)-C(28)    | 117.9(2)   |
| C(29)-N(3)-C(28)    | 114.7(2)   |
| C(20)-N(4)-C(21)    | 115.74(18) |
| C(20)-N(4)-H(3N)    | 107.2(18)  |
| C(21)-N(4)-H(3N)    | 111.7(19)  |
| C(20)-N(4)-H(4N)    | 112.2(18)  |

|                     |            |
|---------------------|------------|
| C(21)-N(4)-H(4N)    | 102.1(19)  |
| H(3N)-N(4)-H(4N)    | 108(2)     |
| O(3)-C(19)-N(3)     | 122.9(2)   |
| O(3)-C(19)-C(20)    | 117.8(2)   |
| N(3)-C(19)-C(20)    | 119.3(2)   |
| N(4)-C(20)-C(19)    | 104.64(19) |
| N(4)-C(20)-C(30)    | 108.55(19) |
| C(19)-C(20)-C(30)   | 112.4(2)   |
| N(4)-C(20)-H(20A)   | 110.4      |
| C(19)-C(20)-H(20A)  | 110.4      |
| C(30)-C(20)-H(20A)  | 110.4      |
| C(22)-C(21)-N(4)    | 113.9(2)   |
| C(22)-C(21)-H(21A)  | 108.8      |
| N(4)-C(21)-H(21A)   | 108.8      |
| C(22)-C(21)-H(21B)  | 108.8      |
| N(4)-C(21)-H(21B)   | 108.8      |
| H(21A)-C(21)-H(21B) | 107.7      |
| C(27)-C(22)-C(23)   | 119.9(2)   |
| C(27)-C(22)-C(21)   | 117.5(2)   |
| C(23)-C(22)-C(21)   | 122.6(2)   |
| O(4)-C(23)-C(22)    | 121.7(2)   |
| O(4)-C(23)-C(24)    | 118.0(2)   |
| C(22)-C(23)-C(24)   | 120.2(2)   |
| C(25)-C(24)-C(23)   | 117.3(2)   |
| C(25)-C(24)-C(33)   | 121.3(2)   |
| C(23)-C(24)-C(33)   | 121.3(2)   |
| C(26)-C(25)-C(24)   | 122.6(2)   |
| C(26)-C(25)-H(25A)  | 118.7      |
| C(24)-C(25)-H(25A)  | 118.7      |
| C(27)-C(26)-C(25)   | 119.6(3)   |
| C(27)-C(26)-H(26A)  | 120.2      |
| C(25)-C(26)-H(26A)  | 120.2      |
| C(26)-C(27)-C(22)   | 120.3(2)   |
| C(26)-C(27)-H(27A)  | 119.8      |
| C(22)-C(27)-H(27A)  | 119.8      |
| N(3)-C(28)-H(28A)   | 109.5      |

|                     |          |
|---------------------|----------|
| N(3)-C(28)-H(28B)   | 109.5    |
| H(28A)-C(28)-H(28B) | 109.5    |
| N(3)-C(28)-H(28C)   | 109.5    |
| H(28A)-C(28)-H(28C) | 109.5    |
| H(28B)-C(28)-H(28C) | 109.5    |
| N(3)-C(29)-H(29A)   | 109.5    |
| N(3)-C(29)-H(29B)   | 109.5    |
| H(29A)-C(29)-H(29B) | 109.5    |
| N(3)-C(29)-H(29C)   | 109.5    |
| H(29A)-C(29)-H(29C) | 109.5    |
| H(29B)-C(29)-H(29C) | 109.5    |
| C(31)-C(30)-C(32)   | 112.2(2) |
| C(31)-C(30)-C(20)   | 110.9(2) |
| C(32)-C(30)-C(20)   | 113.0(2) |
| C(31)-C(30)-H(30A)  | 106.8    |
| C(32)-C(30)-H(30A)  | 106.8    |
| C(20)-C(30)-H(30A)  | 106.8    |
| C(30)-C(31)-H(31A)  | 109.5    |
| C(30)-C(31)-H(31B)  | 109.5    |
| H(31A)-C(31)-H(31B) | 109.5    |
| C(30)-C(31)-H(31C)  | 109.5    |
| H(31A)-C(31)-H(31C) | 109.5    |
| H(31B)-C(31)-H(31C) | 109.5    |
| C(30)-C(32)-H(32A)  | 109.5    |
| C(30)-C(32)-H(32B)  | 109.5    |
| H(32A)-C(32)-H(32B) | 109.5    |
| C(30)-C(32)-H(32C)  | 109.5    |
| H(32A)-C(32)-H(32C) | 109.5    |
| H(32B)-C(32)-H(32C) | 109.5    |
| C(34)-C(33)-C(35)   | 107.6(3) |
| C(34)-C(33)-C(24)   | 110.6(2) |
| C(35)-C(33)-C(24)   | 111.8(2) |
| C(34)-C(33)-C(36)   | 111.2(2) |
| C(35)-C(33)-C(36)   | 106.7(2) |
| C(24)-C(33)-C(36)   | 108.9(2) |
| C(33)-C(34)-H(34A)  | 109.5    |



|                     |            |
|---------------------|------------|
| C(33)-C(34)-H(34B)  | 109.5      |
| H(34A)-C(34)-H(34B) | 109.5      |
| C(33)-C(34)-H(34C)  | 109.5      |
| H(34A)-C(34)-H(34C) | 109.5      |
| H(34B)-C(34)-H(34C) | 109.5      |
| C(33)-C(35)-H(35A)  | 109.5      |
| C(33)-C(35)-H(35B)  | 109.5      |
| H(35A)-C(35)-H(35B) | 109.5      |
| C(33)-C(35)-H(35C)  | 109.5      |
| H(35A)-C(35)-H(35C) | 109.5      |
| H(35B)-C(35)-H(35C) | 109.5      |
| C(33)-C(36)-H(36A)  | 109.5      |
| C(33)-C(36)-H(36B)  | 109.5      |
| H(36A)-C(36)-H(36B) | 109.5      |
| C(33)-C(36)-H(36C)  | 109.5      |
| H(36A)-C(36)-H(36C) | 109.5      |
| H(36B)-C(36)-H(36C) | 109.5      |
| C(41)-O(6)-H(6O)    | 110(2)     |
| C(37)-N(5)-C(47)    | 126.3(2)   |
| C(37)-N(5)-C(46)    | 119.0(3)   |
| C(47)-N(5)-C(46)    | 114.5(3)   |
| C(38)-N(6)-C(39)    | 113.96(19) |
| C(38)-N(6)-H(5N)    | 112.0(19)  |
| C(39)-N(6)-H(5N)    | 102.8(19)  |
| C(38)-N(6)-H(6N)    | 110.3(19)  |
| C(39)-N(6)-H(6N)    | 104.8(19)  |
| H(5N)-N(6)-H(6N)    | 113(3)     |
| O(5)-C(37)-N(5)     | 123.2(3)   |
| O(5)-C(37)-C(38)    | 119.4(3)   |
| N(5)-C(37)-C(38)    | 117.3(2)   |
| N(6)-C(38)-C(37)    | 106.3(2)   |
| N(6)-C(38)-C(48)    | 111.6(2)   |
| C(37)-C(38)-C(48)   | 111.8(2)   |
| N(6)-C(38)-H(38A)   | 109.0      |
| C(37)-C(38)-H(38A)  | 109.0      |
| C(48)-C(38)-H(38A)  | 109.0      |

|                     |            |
|---------------------|------------|
| C(40)-C(39)-N(6)    | 110.31(19) |
| C(40)-C(39)-H(39A)  | 109.6      |
| N(6)-C(39)-H(39A)   | 109.6      |
| C(40)-C(39)-H(39B)  | 109.6      |
| N(6)-C(39)-H(39B)   | 109.6      |
| H(39A)-C(39)-H(39B) | 108.1      |
| C(45)-C(40)-C(41)   | 119.6(2)   |
| C(45)-C(40)-C(39)   | 117.9(2)   |
| C(41)-C(40)-C(39)   | 122.3(2)   |
| O(6)-C(41)-C(40)    | 121.7(2)   |
| O(6)-C(41)-C(42)    | 117.8(2)   |
| C(40)-C(41)-C(42)   | 120.4(2)   |
| C(43)-C(42)-C(41)   | 117.2(2)   |
| C(43)-C(42)-C(51)   | 121.1(2)   |
| C(41)-C(42)-C(51)   | 121.7(2)   |
| C(44)-C(43)-C(42)   | 122.8(2)   |
| C(44)-C(43)-H(43A)  | 118.6      |
| C(42)-C(43)-H(43A)  | 118.6      |
| C(45)-C(44)-C(43)   | 119.1(2)   |
| C(45)-C(44)-H(44A)  | 120.4      |
| C(43)-C(44)-H(44A)  | 120.4      |
| C(40)-C(45)-C(44)   | 120.9(2)   |
| C(40)-C(45)-H(45A)  | 119.6      |
| C(44)-C(45)-H(45A)  | 119.6      |
| N(5)-C(46)-H(46A)   | 109.5      |
| N(5)-C(46)-H(46B)   | 109.5      |
| H(46A)-C(46)-H(46B) | 109.5      |
| N(5)-C(46)-H(46C)   | 109.5      |
| H(46A)-C(46)-H(46C) | 109.5      |
| H(46B)-C(46)-H(46C) | 109.5      |
| N(5)-C(47)-H(47A)   | 109.5      |
| N(5)-C(47)-H(47B)   | 109.5      |
| H(47A)-C(47)-H(47B) | 109.5      |
| N(5)-C(47)-H(47C)   | 109.5      |
| H(47A)-C(47)-H(47C) | 109.5      |
| H(47B)-C(47)-H(47C) | 109.5      |

|                     |          |
|---------------------|----------|
| C(50)-C(48)-C(49)   | 111.8(3) |
| C(50)-C(48)-C(38)   | 111.2(3) |
| C(49)-C(48)-C(38)   | 112.3(3) |
| C(50)-C(48)-H(48A)  | 107.0    |
| C(49)-C(48)-H(48A)  | 107.0    |
| C(38)-C(48)-H(48A)  | 107.0    |
| C(48)-C(49)-H(49A)  | 109.5    |
| C(48)-C(49)-H(49B)  | 109.5    |
| H(49A)-C(49)-H(49B) | 109.5    |
| C(48)-C(49)-H(49C)  | 109.5    |
| H(49A)-C(49)-H(49C) | 109.5    |
| H(49B)-C(49)-H(49C) | 109.5    |
| C(48)-C(50)-H(50A)  | 109.5    |
| C(48)-C(50)-H(50B)  | 109.5    |
| H(50A)-C(50)-H(50B) | 109.5    |
| C(48)-C(50)-H(50C)  | 109.5    |
| H(50A)-C(50)-H(50C) | 109.5    |
| H(50B)-C(50)-H(50C) | 109.5    |
| C(52)-C(51)-C(42)   | 111.8(2) |
| C(52)-C(51)-C(54)   | 107.1(2) |
| C(42)-C(51)-C(54)   | 111.5(2) |
| C(52)-C(51)-C(53)   | 109.8(2) |
| C(42)-C(51)-C(53)   | 109.1(2) |
| C(54)-C(51)-C(53)   | 107.5(2) |
| C(51)-C(52)-H(52A)  | 109.5    |
| C(51)-C(52)-H(52B)  | 109.5    |
| H(52A)-C(52)-H(52B) | 109.5    |
| C(51)-C(52)-H(52C)  | 109.5    |
| H(52A)-C(52)-H(52C) | 109.5    |
| H(52B)-C(52)-H(52C) | 109.5    |
| C(51)-C(53)-H(53A)  | 109.5    |
| C(51)-C(53)-H(53B)  | 109.5    |
| H(53A)-C(53)-H(53B) | 109.5    |
| C(51)-C(53)-H(53C)  | 109.5    |
| H(53A)-C(53)-H(53C) | 109.5    |
| H(53B)-C(53)-H(53C) | 109.5    |

|                     |       |
|---------------------|-------|
| C(51)-C(54)-H(54A)  | 109.5 |
| C(51)-C(54)-H(54B)  | 109.5 |
| H(54A)-C(54)-H(54B) | 109.5 |
| C(51)-C(54)-H(54C)  | 109.5 |
| H(54A)-C(54)-H(54C) | 109.5 |
| H(54B)-C(54)-H(54C) | 109.5 |

---

Symmetry transformations used to generate equivalent atoms:

**Table 4. Anisotropic displacement parameters ( $\text{\AA}^2 \times 10^3$ ) for  $\text{C}_{18}\text{H}_{31}\text{N}_2\text{O}_2\text{Cl}$  ( $2\text{g}\cdot\text{HCl}$ ). The anisotropic displacement factor exponent takes the form:  $-2p^2[h^2 a^*2U11 + \dots + 2hk a^* b^* U12]$**

|       | U11   | U22   | U33   | U23    | U13   | U12   |
|-------|-------|-------|-------|--------|-------|-------|
| Cl(1) | 34(1) | 25(1) | 21(1) | 0(1)   | -3(1) | 2(1)  |
| O(1)  | 23(1) | 31(1) | 24(1) | 4(1)   | -1(1) | -1(1) |
| O(2)  | 26(1) | 24(1) | 21(1) | -2(1)  | -5(1) | 0(1)  |
| N(1)  | 25(1) | 44(1) | 25(1) | -8(1)  | 1(1)  | -3(1) |
| N(2)  | 20(1) | 23(1) | 22(1) | -1(1)  | 1(1)  | 0(1)  |
| C(1)  | 13(1) | 36(1) | 23(1) | -2(1)  | 0(1)  | -5(1) |
| C(2)  | 17(1) | 24(1) | 25(1) | -4(1)  | 4(1)  | 1(1)  |
| C(3)  | 16(1) | 28(1) | 26(1) | 4(1)   | 3(1)  | 0(1)  |
| C(4)  | 15(1) | 28(1) | 27(1) | -1(1)  | 2(1)  | -3(1) |
| C(5)  | 13(1) | 28(1) | 28(1) | -3(1)  | 2(1)  | -1(1) |
| C(6)  | 18(1) | 30(1) | 29(1) | -3(1)  | -1(1) | -1(1) |
| C(7)  | 24(2) | 36(1) | 37(2) | -8(1)  | -6(1) | -3(1) |
| C(8)  | 29(2) | 27(1) | 42(2) | -9(1)  | -5(1) | -2(1) |
| C(9)  | 21(1) | 27(1) | 38(1) | -2(1)  | 0(1)  | -3(1) |
| C(10) | 35(2) | 72(2) | 22(1) | -9(1)  | 0(1)  | -5(2) |
| C(11) | 39(2) | 45(2) | 40(2) | -14(1) | 6(1)  | -4(1) |
| C(12) | 18(1) | 34(1) | 22(1) | -1(1)  | 2(1)  | 1(1)  |
| C(13) | 18(1) | 38(2) | 31(1) | 1(1)   | -2(1) | -2(1) |
| C(14) | 23(2) | 38(1) | 32(1) | 3(1)   | -3(1) | 3(1)  |

|       |       |       |       |       |        |       |
|-------|-------|-------|-------|-------|--------|-------|
| C(15) | 25(2) | 34(1) | 22(1) | -3(1) | -5(1)  | -1(1) |
| C(16) | 22(1) | 36(1) | 28(1) | 0(1)  | -5(1)  | 1(1)  |
| C(17) | 40(2) | 46(2) | 27(2) | -6(1) | -12(1) | 3(1)  |
| C(18) | 28(2) | 37(2) | 26(1) | 4(1)  | -1(1)  | -1(1) |
| Cl(2) | 40(1) | 24(1) | 24(1) | 0(1)  | -2(1)  | 2(1)  |
| O(3)  | 32(1) | 31(1) | 29(1) | 1(1)  | 2(1)   | -4(1) |
| O(4)  | 32(1) | 25(1) | 26(1) | -1(1) | -6(1)  | -1(1) |
| N(3)  | 27(1) | 33(1) | 27(1) | -2(1) | 2(1)   | -2(1) |
| N(4)  | 20(1) | 25(1) | 24(1) | 0(1)  | -1(1)  | 0(1)  |
| C(19) | 16(1) | 33(1) | 29(1) | 0(1)  | -2(1)  | -3(1) |
| C(20) | 20(1) | 25(1) | 25(1) | -3(1) | 0(1)   | 2(1)  |
| C(21) | 19(1) | 27(1) | 26(1) | 1(1)  | 0(1)   | 2(1)  |
| C(22) | 17(1) | 28(1) | 24(1) | 2(1)  | -1(1)  | 2(1)  |
| C(23) | 19(1) | 25(1) | 30(1) | -1(1) | 1(1)   | 1(1)  |
| C(24) | 24(2) | 31(1) | 29(1) | -1(1) | -4(1)  | 4(1)  |
| C(25) | 33(2) | 34(1) | 31(1) | -7(1) | -10(1) | 4(1)  |
| C(26) | 34(2) | 25(1) | 42(2) | -5(1) | -8(1)  | -2(1) |
| C(27) | 23(2) | 27(1) | 34(1) | 4(1)  | -3(1)  | 1(1)  |
| C(28) | 48(2) | 43(2) | 28(2) | -2(1) | 10(1)  | -1(1) |
| C(29) | 33(2) | 34(1) | 31(1) | -4(1) | 4(1)   | 4(1)  |
| C(30) | 21(2) | 42(2) | 27(1) | -2(1) | -2(1)  | 1(1)  |
| C(31) | 26(2) | 48(2) | 37(1) | 2(1)  | -4(1)  | 9(1)  |
| C(32) | 25(2) | 52(2) | 41(2) | -7(1) | -6(1)  | -2(1) |
| C(33) | 38(2) | 34(1) | 29(1) | -2(1) | -7(1)  | 6(1)  |
| C(34) | 46(2) | 41(2) | 30(1) | 7(1)  | 6(1)   | 7(1)  |
| C(35) | 77(3) | 42(2) | 31(2) | -3(1) | -17(2) | 14(2) |
| C(36) | 39(2) | 31(1) | 32(1) | 4(1)  | -10(1) | 3(1)  |
| Cl(3) | 32(1) | 25(1) | 21(1) | 0(1)  | -1(1)  | 1(1)  |
| O(5)  | 39(1) | 48(1) | 36(1) | 3(1)  | -6(1)  | 10(1) |
| O(6)  | 37(1) | 32(1) | 22(1) | 3(1)  | 2(1)   | 11(1) |
| N(5)  | 29(1) | 43(1) | 43(1) | -9(1) | -4(1)  | 9(1)  |
| N(6)  | 26(1) | 32(1) | 21(1) | -3(1) | 0(1)   | 0(1)  |
| C(37) | 27(2) | 39(2) | 31(2) | -5(1) | -7(1)  | 1(1)  |
| C(38) | 25(2) | 37(1) | 25(1) | -1(1) | -1(1)  | 2(1)  |
| C(39) | 23(1) | 24(1) | 23(1) | -2(1) | 2(1)   | -2(1) |
| C(40) | 18(1) | 28(1) | 26(1) | -2(1) | -1(1)  | -4(1) |

|       |       |       |       |        |       |        |
|-------|-------|-------|-------|--------|-------|--------|
| C(41) | 18(1) | 25(1) | 28(1) | 1(1)   | 0(1)  | 0(1)   |
| C(42) | 22(2) | 29(1) | 26(1) | -1(1)  | 0(1)  | -5(1)  |
| C(43) | 27(2) | 32(1) | 30(1) | 6(1)   | -8(1) | -1(1)  |
| C(44) | 34(2) | 28(1) | 38(2) | 1(1)   | -8(1) | 6(1)   |
| C(45) | 24(2) | 24(1) | 35(1) | -6(1)  | -3(1) | 0(1)   |
| C(46) | 54(2) | 50(2) | 56(2) | 0(2)   | 2(2)  | 20(2)  |
| C(47) | 31(2) | 49(2) | 38(2) | -11(1) | 2(1)  | 1(1)   |
| C(48) | 34(2) | 42(2) | 41(2) | -9(1)  | 12(1) | -4(1)  |
| C(49) | 64(3) | 71(2) | 48(2) | -23(2) | 3(2)  | -30(2) |
| C(50) | 60(3) | 39(2) | 75(3) | 6(2)   | 32(2) | -2(2)  |
| C(51) | 35(2) | 33(1) | 23(1) | 0(1)   | -3(1) | 0(1)   |
| C(52) | 44(2) | 55(2) | 25(1) | 0(1)   | 5(1)  | 4(2)   |
| C(53) | 47(2) | 34(2) | 36(2) | -7(1)  | -8(1) | -1(1)  |
| C(54) | 56(2) | 46(2) | 25(1) | -1(1)  | -4(1) | 7(2)   |

**Table 5. Hydrogen coordinates (  $\times 10^4$ ) and isotropic displacement parameters ( $\text{\AA}^2 \times 10^3$ ) for  $\text{C}_{18}\text{H}_{31}\text{N}_2\text{O}_2\text{Cl}$  ( $2\text{g}\cdot\text{HCl}$ ).**

|        | x        | y        | z        | U(eq) |
|--------|----------|----------|----------|-------|
| H(2O)  | 7320(30) | 4705(14) | 6859(13) | 36    |
| H(1N)  | 4490(30) | 5606(12) | 5751(11) | 26    |
| H(2N)  | 4910(40) | 5157(8)  | 6370(16) | 26    |
| H(2B)  | 3960     | 6338     | 6829     | 26    |
| H(3A)  | 7297     | 5488     | 6001     | 28    |
| H(3B)  | 6699     | 6183     | 6044     | 28    |
| H(7A)  | 9384     | 6063     | 9134     | 39    |
| H(8A)  | 8602     | 6909     | 8381     | 39    |
| H(9A)  | 7312     | 6770     | 7136     | 34    |
| H(10A) | 4262     | 5317     | 9047     | 65    |
| H(10B) | 3292     | 5880     | 9421     | 65    |
| H(10C) | 5224     | 5936     | 9264     | 65    |
| H(11A) | 4405     | 6880     | 8139     | 62    |
| H(11B) | 2851     | 6777     | 8688     | 62    |

|        |          |          |          |    |
|--------|----------|----------|----------|----|
| H(11C) | 2645     | 6707     | 7745     | 62 |
| H(12A) | 1201     | 5886     | 7032     | 30 |
| H(13A) | 348      | 5075     | 6194     | 43 |
| H(13B) | 1777     | 4856     | 6805     | 43 |
| H(13C) | 2197     | 4997     | 5902     | 43 |
| H(14A) | 180      | 6139     | 5748     | 47 |
| H(14B) | 2023     | 6141     | 5432     | 47 |
| H(14C) | 1477     | 6639     | 6069     | 47 |
| H(16A) | 11517    | 4767     | 8423     | 43 |
| H(16B) | 10200    | 4335     | 7973     | 43 |
| H(16C) | 10900    | 4154     | 8840     | 43 |
| H(17A) | 10743    | 5308     | 9662     | 57 |
| H(17B) | 10068    | 4679     | 10013    | 57 |
| H(17C) | 8895     | 5268     | 9968     | 57 |
| H(18A) | 7195     | 4307     | 8466     | 45 |
| H(18B) | 6791     | 4675     | 9257     | 45 |
| H(18C) | 7962     | 4086     | 9304     | 45 |
| H(4O)  | 6910(40) | 1290(15) | 6658(14) | 42 |
| H(3N)  | 4790(40) | 1834(9)  | 5814(16) | 28 |
| H(4N)  | 5070(40) | 2218(13) | 5112(10) | 28 |
| H(20A) | 4790     | 3085     | 6071     | 28 |
| H(21A) | 7539     | 1858     | 5643     | 29 |
| H(21B) | 7456     | 2569     | 5427     | 29 |
| H(25A) | 8732     | 2888     | 8675     | 39 |
| H(26A) | 8494     | 3613     | 7678     | 40 |
| H(27A) | 7753     | 3317     | 6391     | 34 |
| H(28A) | 3041     | 2159     | 8211     | 59 |
| H(28B) | 2323     | 2810     | 8465     | 59 |
| H(28C) | 4234     | 2655     | 8627     | 59 |
| H(29A) | 4293     | 3625     | 6944     | 49 |
| H(29B) | 4743     | 3620     | 7875     | 49 |
| H(29C) | 2868     | 3710     | 7571     | 49 |
| H(30A) | 2838     | 2848     | 4999     | 36 |
| H(31A) | 570      | 3375     | 5523     | 55 |
| H(31B) | 2286     | 3699     | 5761     | 55 |
| H(31C) | 1359     | 3292     | 6399     | 55 |

|        |          |          |          |    |
|--------|----------|----------|----------|----|
| H(32A) | 440      | 2277     | 5244     | 60 |
| H(32B) | 1188     | 2092     | 6100     | 60 |
| H(32C) | 2061     | 1859     | 5316     | 60 |
| H(34A) | 5839     | 1622     | 8905     | 58 |
| H(34B) | 6830     | 1033     | 9219     | 58 |
| H(34C) | 6409     | 1111     | 8291     | 58 |
| H(35A) | 7940     | 2256     | 9623     | 76 |
| H(35B) | 9855     | 2184     | 9438     | 76 |
| H(35C) | 8915     | 1651     | 9892     | 76 |
| H(36A) | 9865     | 915      | 8923     | 51 |
| H(36B) | 10785    | 1445     | 8454     | 51 |
| H(36C) | 9490     | 1009     | 7993     | 51 |
| H(6O)  | 5220(40) | 3068(14) | 2878(13) | 45 |
| H(5N)  | 6530(40) | 4301(14) | 4533(11) | 32 |
| H(6N)  | 5860(40) | 4802(9)  | 3982(17) | 32 |
| H(38A) | 7230     | 4281     | 2931     | 35 |
| H(39A) | 5124     | 3566     | 3869     | 28 |
| H(39B) | 3912     | 4075     | 4212     | 28 |
| H(43A) | 2757     | 4591     | 959      | 36 |
| H(44A) | 2093     | 5197     | 2033     | 41 |
| H(45A) | 2974     | 4911     | 3310     | 33 |
| H(46A) | 10179    | 2800     | 3997     | 80 |
| H(46B) | 11516    | 2930     | 3338     | 80 |
| H(46C) | 9894     | 2541     | 3115     | 80 |
| H(47A) | 8932     | 3975     | 2265     | 59 |
| H(47B) | 9264     | 3276     | 2039     | 59 |
| H(47C) | 10778    | 3714     | 2281     | 59 |
| H(48A) | 9863     | 4752     | 3229     | 47 |
| H(49A) | 10255    | 5341     | 4388     | 91 |
| H(49B) | 10070    | 4630     | 4597     | 91 |
| H(49C) | 8553     | 5087     | 4717     | 91 |
| H(50A) | 8924     | 5770     | 3191     | 86 |
| H(50B) | 7121     | 5546     | 3422     | 86 |
| H(50C) | 7865     | 5347     | 2591     | 86 |
| H(52A) | 6360     | 3147     | 301      | 61 |
| H(52B) | 6624     | 3204     | 1243     | 61 |



|        |      |      |      |    |
|--------|------|------|------|----|
| H(52C) | 6742 | 3800 | 695  | 61 |
| H(53A) | 3646 | 2640 | 474  | 59 |
| H(53B) | 2236 | 2971 | 962  | 59 |
| H(53C) | 3826 | 2695 | 1420 | 59 |
| H(54A) | 3927 | 3542 | -380 | 63 |
| H(54B) | 4239 | 4206 | -6   | 63 |
| H(54C) | 2494 | 3876 | 89   | 63 |

**Table 6. Torsion angles [°] for C<sub>18</sub>H<sub>31</sub>N<sub>2</sub>O<sub>2</sub>Cl (2g•HCl)**

|                      |            |
|----------------------|------------|
| C(11)-N(1)-C(1)-O(1) | 178.9(3)   |
| C(10)-N(1)-C(1)-O(1) | 6.3(4)     |
| C(11)-N(1)-C(1)-C(2) | -3.9(4)    |
| C(10)-N(1)-C(1)-C(2) | -176.6(2)  |
| C(3)-N(2)-C(2)-C(1)  | -78.7(2)   |
| C(3)-N(2)-C(2)-C(12) | 162.57(19) |
| O(1)-C(1)-C(2)-N(2)  | -34.0(3)   |
| N(1)-C(1)-C(2)-N(2)  | 148.7(2)   |
| O(1)-C(1)-C(2)-C(12) | 86.4(3)    |
| N(1)-C(1)-C(2)-C(12) | -90.9(3)   |
| C(2)-N(2)-C(3)-C(4)  | 48.5(3)    |
| N(2)-C(3)-C(4)-C(9)  | -105.6(3)  |
| N(2)-C(3)-C(4)-C(5)  | 77.6(3)    |
| C(9)-C(4)-C(5)-O(2)  | -175.1(2)  |
| C(3)-C(4)-C(5)-O(2)  | 1.7(4)     |
| C(9)-C(4)-C(5)-C(6)  | 4.5(4)     |
| C(3)-C(4)-C(5)-C(6)  | -178.7(2)  |
| O(2)-C(5)-C(6)-C(7)  | 175.1(2)   |
| C(4)-C(5)-C(6)-C(7)  | -4.6(4)    |
| O(2)-C(5)-C(6)-C(15) | -5.6(4)    |
| C(4)-C(5)-C(6)-C(15) | 174.7(2)   |
| C(5)-C(6)-C(7)-C(8)  | 1.7(4)     |
| C(15)-C(6)-C(7)-C(8) | -177.6(3)  |
| C(6)-C(7)-C(8)-C(9)  | 1.3(5)     |

|                         |           |
|-------------------------|-----------|
| C(7)-C(8)-C(9)-C(4)     | -1.5(4)   |
| C(5)-C(4)-C(9)-C(8)     | -1.4(4)   |
| C(3)-C(4)-C(9)-C(8)     | -178.4(2) |
| N(2)-C(2)-C(12)-C(14)   | -81.6(3)  |
| C(1)-C(2)-C(12)-C(14)   | 161.2(2)  |
| N(2)-C(2)-C(12)-C(13)   | 44.0(3)   |
| C(1)-C(2)-C(12)-C(13)   | -73.2(2)  |
| C(7)-C(6)-C(15)-C(16)   | -115.4(3) |
| C(5)-C(6)-C(15)-C(16)   | 65.3(3)   |
| C(7)-C(6)-C(15)-C(18)   | 121.1(3)  |
| C(5)-C(6)-C(15)-C(18)   | -58.2(3)  |
| C(7)-C(6)-C(15)-C(17)   | 3.4(4)    |
| C(5)-C(6)-C(15)-C(17)   | -175.9(3) |
| C(29)-N(3)-C(19)-O(3)   | 172.3(3)  |
| C(28)-N(3)-C(19)-O(3)   | -1.5(4)   |
| C(29)-N(3)-C(19)-C(20)  | -10.9(4)  |
| C(28)-N(3)-C(19)-C(20)  | 175.4(2)  |
| C(21)-N(4)-C(20)-C(19)  | -86.5(2)  |
| C(21)-N(4)-C(20)-C(30)  | 153.2(2)  |
| O(3)-C(19)-C(20)-N(4)   | -30.7(3)  |
| N(3)-C(19)-C(20)-N(4)   | 152.3(2)  |
| O(3)-C(19)-C(20)-C(30)  | 86.9(3)   |
| N(3)-C(19)-C(20)-C(30)  | -90.1(3)  |
| C(20)-N(4)-C(21)-C(22)  | 42.3(3)   |
| N(4)-C(21)-C(22)-C(27)  | -95.7(3)  |
| N(4)-C(21)-C(22)-C(23)  | 83.8(3)   |
| C(27)-C(22)-C(23)-O(4)  | -176.5(2) |
| C(21)-C(22)-C(23)-O(4)  | 3.9(4)    |
| C(27)-C(22)-C(23)-C(24) | 1.0(4)    |
| C(21)-C(22)-C(23)-C(24) | -178.5(2) |
| O(4)-C(23)-C(24)-C(25)  | 177.6(3)  |
| C(22)-C(23)-C(24)-C(25) | -0.1(4)   |
| O(4)-C(23)-C(24)-C(33)  | -3.6(4)   |
| C(22)-C(23)-C(24)-C(33) | 178.7(3)  |
| C(23)-C(24)-C(25)-C(26) | -0.8(5)   |
| C(33)-C(24)-C(25)-C(26) | -179.6(3) |

|                         |           |
|-------------------------|-----------|
| C(24)-C(25)-C(26)-C(27) | 0.7(5)    |
| C(25)-C(26)-C(27)-C(22) | 0.3(4)    |
| C(23)-C(22)-C(27)-C(26) | -1.2(4)   |
| C(21)-C(22)-C(27)-C(26) | 178.4(3)  |
| N(4)-C(20)-C(30)-C(31)  | -169.4(2) |
| C(19)-C(20)-C(30)-C(31) | 75.3(3)   |
| N(4)-C(20)-C(30)-C(32)  | 63.5(3)   |
| C(19)-C(20)-C(30)-C(32) | -51.7(3)  |
| C(25)-C(24)-C(33)-C(34) | 120.0(3)  |
| C(23)-C(24)-C(33)-C(34) | -58.8(4)  |
| C(25)-C(24)-C(33)-C(35) | 0.1(4)    |
| C(23)-C(24)-C(33)-C(35) | -178.6(3) |
| C(25)-C(24)-C(33)-C(36) | -117.6(3) |
| C(23)-C(24)-C(33)-C(36) | 63.7(3)   |
| C(47)-N(5)-C(37)-O(5)   | 174.4(3)  |
| C(46)-N(5)-C(37)-O(5)   | 0.6(4)    |
| C(47)-N(5)-C(37)-C(38)  | -8.5(4)   |
| C(46)-N(5)-C(37)-C(38)  | 177.7(3)  |
| C(39)-N(6)-C(38)-C(37)  | -75.6(2)  |
| C(39)-N(6)-C(38)-C(48)  | 162.2(2)  |
| O(5)-C(37)-C(38)-N(6)   | -23.1(3)  |
| N(5)-C(37)-C(38)-N(6)   | 159.7(2)  |
| O(5)-C(37)-C(38)-C(48)  | 98.9(3)   |
| N(5)-C(37)-C(38)-C(48)  | -78.3(3)  |
| C(38)-N(6)-C(39)-C(40)  | -60.4(3)  |
| N(6)-C(39)-C(40)-C(45)  | -74.9(3)  |
| N(6)-C(39)-C(40)-C(41)  | 100.7(3)  |
| C(45)-C(40)-C(41)-O(6)  | 177.8(2)  |
| C(39)-C(40)-C(41)-O(6)  | 2.2(4)    |
| C(45)-C(40)-C(41)-C(42) | 1.3(4)    |
| C(39)-C(40)-C(41)-C(42) | -174.3(2) |
| O(6)-C(41)-C(42)-C(43)  | -176.9(2) |
| C(40)-C(41)-C(42)-C(43) | -0.2(4)   |
| O(6)-C(41)-C(42)-C(51)  | 4.1(4)    |
| C(40)-C(41)-C(42)-C(51) | -179.3(2) |
| C(41)-C(42)-C(43)-C(44) | -1.1(4)   |

|                         |           |
|-------------------------|-----------|
| C(51)-C(42)-C(43)-C(44) | 178.0(3)  |
| C(42)-C(43)-C(44)-C(45) | 1.3(4)    |
| C(41)-C(40)-C(45)-C(44) | -1.1(4)   |
| C(39)-C(40)-C(45)-C(44) | 174.6(2)  |
| C(43)-C(44)-C(45)-C(40) | -0.2(4)   |
| N(6)-C(38)-C(48)-C(50)  | -71.3(3)  |
| C(37)-C(38)-C(48)-C(50) | 169.7(2)  |
| N(6)-C(38)-C(48)-C(49)  | 54.9(3)   |
| C(37)-C(38)-C(48)-C(49) | -64.1(3)  |
| C(43)-C(42)-C(51)-C(52) | 122.7(3)  |
| C(41)-C(42)-C(51)-C(52) | -58.2(3)  |
| C(43)-C(42)-C(51)-C(54) | 2.9(4)    |
| C(41)-C(42)-C(51)-C(54) | -178.0(3) |
| C(43)-C(42)-C(51)-C(53) | -115.6(3) |
| C(41)-C(42)-C(51)-C(53) | 63.4(3)   |

---

Symmetry transformations used to generate equivalent atoms:

**Table 7. Hydrogen bonds for C<sub>18</sub>H<sub>31</sub>N<sub>2</sub>O<sub>2</sub>Cl (2g•HCl) [Å and °]**

| D-H...A              | d(D-H)    | d(H...A)  | d(D...A)   | <(DHA) |
|----------------------|-----------|-----------|------------|--------|
| O(2)-H(2O)...Cl(1)   | 0.857(18) | 2.26(2)   | 3.0861(17) | 162(3) |
| N(2)-H(2N)...Cl(1)   | 0.915(17) | 2.27(2)   | 3.042(2)   | 142(2) |
| N(2)-H(1N)...Cl(3)   | 0.937(17) | 2.259(19) | 3.161(2)   | 161(2) |
| O(4)-H(4O)...Cl(3)#1 | 0.855(18) | 2.44(2)   | 3.2538(18) | 160(3) |
| N(4)-H(3N)...O(3)    | 0.914(17) | 2.13(3)   | 2.603(3)   | 111(2) |
| N(4)-H(3N)...Cl(3)#1 | 0.914(17) | 2.50(2)   | 3.218(2)   | 136(2) |
| N(4)-H(4N)...Cl(2)   | 0.914(17) | 2.205(18) | 3.113(2)   | 172(3) |
| O(6)-H(6O)...Cl(2)   | 0.851(18) | 2.21(2)   | 3.0290(19) | 161(3) |
| N(6)-H(5N)...Cl(1)   | 0.909(17) | 2.27(2)   | 3.087(2)   | 149(3) |
| N(6)-H(6N)...Cl(3)   | 0.925(17) | 2.45(2)   | 3.320(2)   | 157(2) |

---

Symmetry transformations used to generate equivalent atoms:

#1 -x+1,y-1/2,-z+1

**X-ray Crystal Structure of 2g (Table 1)**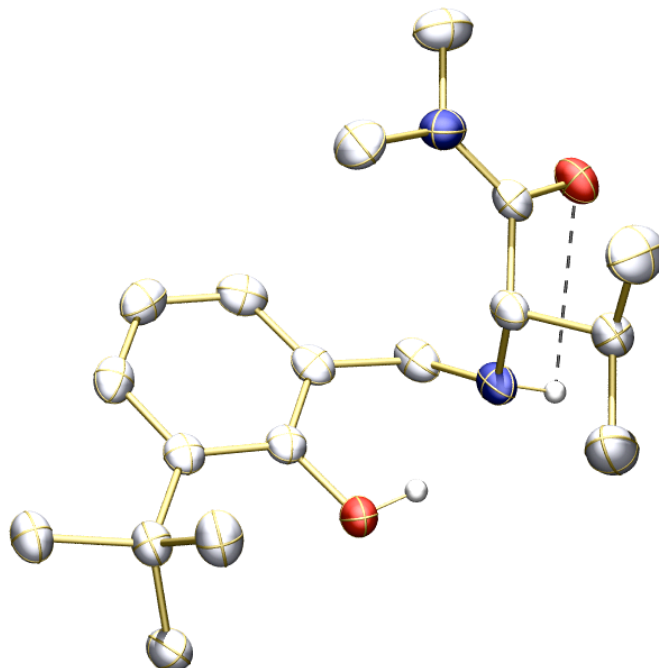**Table 1. Crystal data and structure refinement for C<sub>18</sub>H<sub>30</sub>N<sub>2</sub>O<sub>2</sub> (2g).**

|                        |                                                               |         |
|------------------------|---------------------------------------------------------------|---------|
| Identification code    | C <sub>18</sub> H <sub>30</sub> N <sub>2</sub> O <sub>2</sub> |         |
| Empirical formula      | C <sub>18</sub> H <sub>30</sub> N <sub>2</sub> O <sub>2</sub> |         |
| Formula weight         | 306.44                                                        |         |
| Temperature            | 143(2) K                                                      |         |
| Wavelength             | 1.54178 Å                                                     |         |
| Crystal system         | Orthorhombic                                                  |         |
| Space group            | P2(1)2(1)2(1)                                                 |         |
| Unit cell dimensions   | a = 7.4590(6) Å                                               | α = 90° |
|                        | b = 14.9795(12) Å                                             | β = 90° |
|                        | c = 16.2770(13) Å                                             | γ = 90° |
| Volume                 | 1818.7(3) Å <sup>3</sup>                                      |         |
| Z                      | 4                                                             |         |
| Density (calculated)   | 1.119 Mg/m <sup>3</sup>                                       |         |
| Absorption coefficient | 0.570 mm <sup>-1</sup>                                        |         |
| F(000)                 | 672                                                           |         |
| Crystal size           | 0.17 x 0.10 x 0.05 mm <sup>3</sup>                            |         |

|                                   |                                             |
|-----------------------------------|---------------------------------------------|
| Theta range for data collection   | 4.01 to 67.94°                              |
| Index ranges                      | -8<=h<=3, -18<=k<=17, -19<=l<=19            |
| Reflections collected             | 13923                                       |
| Independent reflections           | 3190 [R(int) = 0.0179]                      |
| Completeness to theta = 67.94°    | 99.2 %                                      |
| Absorption correction             | Semi-empirical from equivalents             |
| Max. and min. transmission        | 0.9721 and 0.9093                           |
| Refinement method                 | Full-matrix least-squares on F <sup>2</sup> |
| Data / restraints / parameters    | 3190 / 3 / 210                              |
| Goodness-of-fit on F <sup>2</sup> | 1.064                                       |
| Final R indices [I>2sigma(I)]     | R1 = 0.0292, wR2 = 0.0780                   |
| R indices (all data)              | R1 = 0.0293, wR2 = 0.0781                   |
| Absolute structure parameter      | 0.09(19)                                    |
| Extinction coefficient            | na                                          |
| Largest diff. peak and hole       | 0.144 and -0.103 e.Å <sup>-3</sup>          |

**Table 2. Atomic coordinates ( x 10<sup>4</sup>) and equivalent isotropic displacement parameters (Å<sup>2</sup> x 10<sup>3</sup>) for C<sub>18</sub>H<sub>30</sub>N<sub>2</sub>O<sub>2</sub> (2g). U(eq) is defined as one third of the trace of the orthogonalized U<sup>ij</sup> tensor.**

|      | x       | y       | z       | U(eq) |
|------|---------|---------|---------|-------|
| O(1) | -318(1) | 6477(1) | 2399(1) | 34(1) |
| O(2) | 4304(1) | 8137(1) | 390(1)  | 39(1) |
| N(1) | 1412(2) | 7118(1) | 1121(1) | 33(1) |
| N(2) | 5199(2) | 8362(1) | 1699(1) | 36(1) |
| C(1) | -51(2)  | 7283(1) | 2771(1) | 28(1) |
| C(2) | -223(2) | 7349(1) | 3633(1) | 28(1) |
| C(3) | 18(2)   | 8194(1) | 3976(1) | 33(1) |
| C(4) | 456(2)  | 8934(1) | 3510(1) | 37(1) |
| C(5) | 650(2)  | 8851(1) | 2667(1) | 36(1) |
| C(6) | 380(2)  | 8032(1) | 2291(1) | 31(1) |
| C(7) | 503(2)  | 7944(1) | 1367(1) | 36(1) |
| C(8) | 3309(2) | 7046(1) | 1351(1) | 29(1) |
| C(9) | 4330(2) | 7894(1) | 1115(1) | 31(1) |

|       |          |         |         |       |
|-------|----------|---------|---------|-------|
| C(10) | 5325(2)  | 8115(1) | 2566(1) | 44(1) |
| C(11) | 6055(2)  | 9200(1) | 1471(1) | 48(1) |
| C(12) | -610(2)  | 6519(1) | 4160(1) | 31(1) |
| C(13) | 882(2)   | 5825(1) | 4040(1) | 40(1) |
| C(14) | -2426(2) | 6110(1) | 3925(1) | 40(1) |
| C(15) | -673(2)  | 6747(1) | 5081(1) | 38(1) |
| C(16) | 4143(2)  | 6228(1) | 933(1)  | 35(1) |
| C(17) | 6119(2)  | 6137(1) | 1134(1) | 54(1) |
| C(18) | 3107(3)  | 5387(1) | 1155(1) | 56(1) |

**Table 3. Bond lengths [ $\text{\AA}$ ] and angles [ $^\circ$ ] for  $\text{C}_{18}\text{H}_{30}\text{N}_2\text{O}_2$  (2g)**

|            |            |
|------------|------------|
| O(1)-C(1)  | 1.3656(15) |
| O(1)-H(1O) | 0.839(13)  |
| O(2)-C(9)  | 1.2351(15) |
| N(1)-C(7)  | 1.4659(19) |
| N(1)-C(8)  | 1.4678(17) |
| N(1)-H(1N) | 0.898(13)  |
| N(2)-C(9)  | 1.3472(17) |
| N(2)-C(11) | 1.4563(18) |
| N(2)-C(10) | 1.4629(18) |
| C(1)-C(6)  | 1.4043(17) |
| C(1)-C(2)  | 1.4111(17) |
| C(2)-C(3)  | 1.3956(18) |
| C(2)-C(12) | 1.5382(17) |
| C(3)-C(4)  | 1.382(2)   |
| C(3)-H(3)  | 0.9500     |
| C(4)-C(5)  | 1.385(2)   |
| C(4)-H(4)  | 0.9500     |
| C(5)-C(6)  | 1.3858(19) |
| C(5)-H(5)  | 0.9500     |
| C(6)-C(7)  | 1.5127(17) |
| C(7)-H(7A) | 0.9900     |
| C(7)-H(7B) | 0.9900     |

|                 |            |
|-----------------|------------|
| C(8)-C(9)       | 1.5297(17) |
| C(8)-C(16)      | 1.5332(19) |
| C(8)-H(8)       | 0.991(12)  |
| C(10)-H(10A)    | 0.9800     |
| C(10)-H(10B)    | 0.9800     |
| C(10)-H(10C)    | 0.9800     |
| C(11)-H(11A)    | 0.9800     |
| C(11)-H(11B)    | 0.9800     |
| C(11)-H(11C)    | 0.9800     |
| C(12)-C(14)     | 1.535(2)   |
| C(12)-C(13)     | 1.5355(19) |
| C(12)-C(15)     | 1.5385(17) |
| C(13)-H(13A)    | 0.9800     |
| C(13)-H(13B)    | 0.9800     |
| C(13)-H(13C)    | 0.9800     |
| C(14)-H(14A)    | 0.9800     |
| C(14)-H(14B)    | 0.9800     |
| C(14)-H(14C)    | 0.9800     |
| C(15)-H(15A)    | 0.9800     |
| C(15)-H(15B)    | 0.9800     |
| C(15)-H(15C)    | 0.9800     |
| C(16)-C(17)     | 1.516(2)   |
| C(16)-C(18)     | 1.522(2)   |
| C(16)-H(16)     | 1.0000     |
| C(17)-H(17A)    | 0.9800     |
| C(17)-H(17B)    | 0.9800     |
| C(17)-H(17C)    | 0.9800     |
| C(18)-H(18A)    | 0.9800     |
| C(18)-H(18B)    | 0.9800     |
| C(18)-H(18C)    | 0.9800     |
| C(1)-O(1)-H(1O) | 106.8(11)  |
| C(7)-N(1)-C(8)  | 115.97(11) |
| C(7)-N(1)-H(1N) | 109.7(10)  |
| C(8)-N(1)-H(1N) | 110.8(11)  |
| C(9)-N(2)-C(11) | 118.70(12) |
| C(9)-N(2)-C(10) | 125.46(11) |



|                   |            |
|-------------------|------------|
| C(11)-N(2)-C(10)  | 115.81(12) |
| O(1)-C(1)-C(6)    | 119.55(11) |
| O(1)-C(1)-C(2)    | 119.25(11) |
| C(6)-C(1)-C(2)    | 121.20(11) |
| C(3)-C(2)-C(1)    | 116.73(11) |
| C(3)-C(2)-C(12)   | 122.22(11) |
| C(1)-C(2)-C(12)   | 121.03(11) |
| C(4)-C(3)-C(2)    | 122.53(12) |
| C(4)-C(3)-H(3)    | 118.7      |
| C(2)-C(3)-H(3)    | 118.7      |
| C(3)-C(4)-C(5)    | 119.78(12) |
| C(3)-C(4)-H(4)    | 120.1      |
| C(5)-C(4)-H(4)    | 120.1      |
| C(4)-C(5)-C(6)    | 120.08(12) |
| C(4)-C(5)-H(5)    | 120.0      |
| C(6)-C(5)-H(5)    | 120.0      |
| C(5)-C(6)-C(1)    | 119.65(12) |
| C(5)-C(6)-C(7)    | 120.53(12) |
| C(1)-C(6)-C(7)    | 119.80(12) |
| N(1)-C(7)-C(6)    | 111.95(10) |
| N(1)-C(7)-H(7A)   | 109.2      |
| C(6)-C(7)-H(7A)   | 109.2      |
| N(1)-C(7)-H(7B)   | 109.2      |
| C(6)-C(7)-H(7B)   | 109.2      |
| H(7A)-C(7)-H(7B)  | 107.9      |
| N(1)-C(8)-C(9)    | 110.81(10) |
| N(1)-C(8)-C(16)   | 109.65(11) |
| C(9)-C(8)-C(16)   | 110.53(10) |
| N(1)-C(8)-H(8)    | 107.6(9)   |
| C(9)-C(8)-H(8)    | 110.4(9)   |
| C(16)-C(8)-H(8)   | 107.7(9)   |
| O(2)-C(9)-N(2)    | 121.89(12) |
| O(2)-C(9)-C(8)    | 118.46(11) |
| N(2)-C(9)-C(8)    | 119.64(11) |
| N(2)-C(10)-H(10A) | 109.5      |
| N(2)-C(10)-H(10B) | 109.5      |

|                     |            |
|---------------------|------------|
| H(10A)-C(10)-H(10B) | 109.5      |
| N(2)-C(10)-H(10C)   | 109.5      |
| H(10A)-C(10)-H(10C) | 109.5      |
| H(10B)-C(10)-H(10C) | 109.5      |
| N(2)-C(11)-H(11A)   | 109.5      |
| N(2)-C(11)-H(11B)   | 109.5      |
| H(11A)-C(11)-H(11B) | 109.5      |
| N(2)-C(11)-H(11C)   | 109.5      |
| H(11A)-C(11)-H(11C) | 109.5      |
| H(11B)-C(11)-H(11C) | 109.5      |
| C(14)-C(12)-C(13)   | 109.77(11) |
| C(14)-C(12)-C(2)    | 110.44(11) |
| C(13)-C(12)-C(2)    | 109.86(11) |
| C(14)-C(12)-C(15)   | 107.73(11) |
| C(13)-C(12)-C(15)   | 107.23(11) |
| C(2)-C(12)-C(15)    | 111.73(11) |
| C(12)-C(13)-H(13A)  | 109.5      |
| C(12)-C(13)-H(13B)  | 109.5      |
| H(13A)-C(13)-H(13B) | 109.5      |
| C(12)-C(13)-H(13C)  | 109.5      |
| H(13A)-C(13)-H(13C) | 109.5      |
| H(13B)-C(13)-H(13C) | 109.5      |
| C(12)-C(14)-H(14A)  | 109.5      |
| C(12)-C(14)-H(14B)  | 109.5      |
| H(14A)-C(14)-H(14B) | 109.5      |
| C(12)-C(14)-H(14C)  | 109.5      |
| H(14A)-C(14)-H(14C) | 109.5      |
| H(14B)-C(14)-H(14C) | 109.5      |
| C(12)-C(15)-H(15A)  | 109.5      |
| C(12)-C(15)-H(15B)  | 109.5      |
| H(15A)-C(15)-H(15B) | 109.5      |
| C(12)-C(15)-H(15C)  | 109.5      |
| H(15A)-C(15)-H(15C) | 109.5      |
| H(15B)-C(15)-H(15C) | 109.5      |
| C(17)-C(16)-C(18)   | 111.58(14) |
| C(17)-C(16)-C(8)    | 111.74(12) |

|                     |            |
|---------------------|------------|
| C(18)-C(16)-C(8)    | 110.55(11) |
| C(17)-C(16)-H(16)   | 107.6      |
| C(18)-C(16)-H(16)   | 107.6      |
| C(8)-C(16)-H(16)    | 107.6      |
| C(16)-C(17)-H(17A)  | 109.5      |
| C(16)-C(17)-H(17B)  | 109.5      |
| H(17A)-C(17)-H(17B) | 109.5      |
| C(16)-C(17)-H(17C)  | 109.5      |
| H(17A)-C(17)-H(17C) | 109.5      |
| H(17B)-C(17)-H(17C) | 109.5      |
| C(16)-C(18)-H(18A)  | 109.5      |
| C(16)-C(18)-H(18B)  | 109.5      |
| H(18A)-C(18)-H(18B) | 109.5      |
| C(16)-C(18)-H(18C)  | 109.5      |
| H(18A)-C(18)-H(18C) | 109.5      |
| H(18B)-C(18)-H(18C) | 109.5      |

---

Symmetry transformations used to generate equivalent atoms:

**Table 4. Anisotropic displacement parameters ( $\text{\AA}^2 \times 10^3$ ) for  $\text{C}_{18}\text{H}_{30}\text{N}_2\text{O}_2$  (2g). The anisotropic displacement factor exponent takes the form:  $-2p^2 [ h^2 a^{*2} U_{11} + \dots + 2 h k a^* b^* U_{12} ]$**

|      | U11   | U22   | U33   | U23   | U13   | U12   |
|------|-------|-------|-------|-------|-------|-------|
| O(1) | 36(1) | 38(1) | 26(1) | -3(1) | 4(1)  | -7(1) |
| O(2) | 41(1) | 46(1) | 31(1) | 8(1)  | 8(1)  | -2(1) |
| N(1) | 28(1) | 46(1) | 23(1) | 2(1)  | -2(1) | -3(1) |
| N(2) | 32(1) | 36(1) | 40(1) | 0(1)  | 0(1)  | -4(1) |
| C(1) | 20(1) | 33(1) | 30(1) | -1(1) | -1(1) | 1(1)  |
| C(2) | 20(1) | 34(1) | 31(1) | 0(1)  | -1(1) | 4(1)  |
| C(3) | 27(1) | 38(1) | 34(1) | -6(1) | -2(1) | 8(1)  |
| C(4) | 33(1) | 31(1) | 48(1) | -6(1) | -4(1) | 6(1)  |
| C(5) | 27(1) | 33(1) | 48(1) | 8(1)  | -1(1) | 4(1)  |
| C(6) | 19(1) | 38(1) | 34(1) | 5(1)  | 0(1)  | 4(1)  |

|       |       |       |       |       |        |       |
|-------|-------|-------|-------|-------|--------|-------|
| C(7)  | 28(1) | 47(1) | 32(1) | 11(1) | -1(1)  | 1(1)  |
| C(8)  | 27(1) | 38(1) | 22(1) | 2(1)  | 0(1)   | -3(1) |
| C(9)  | 25(1) | 35(1) | 31(1) | 2(1)  | 5(1)   | 2(1)  |
| C(10) | 39(1) | 54(1) | 40(1) | -3(1) | -11(1) | -4(1) |
| C(11) | 41(1) | 36(1) | 68(1) | 1(1)  | -3(1)  | -6(1) |
| C(12) | 31(1) | 35(1) | 28(1) | 1(1)  | 3(1)   | 2(1)  |
| C(13) | 47(1) | 38(1) | 36(1) | 4(1)  | 4(1)   | 10(1) |
| C(14) | 39(1) | 46(1) | 35(1) | 2(1)  | 4(1)   | -9(1) |
| C(15) | 39(1) | 46(1) | 29(1) | 1(1)  | 3(1)   | 3(1)  |
| C(16) | 35(1) | 38(1) | 32(1) | -1(1) | 4(1)   | -3(1) |
| C(17) | 41(1) | 48(1) | 73(1) | -7(1) | 0(1)   | 10(1) |
| C(18) | 64(1) | 38(1) | 65(1) | -4(1) | 22(1)  | -8(1) |

**Table 5. Hydrogen coordinates ( $\times 10^4$ ) and isotropic displacement parameters ( $\text{\AA}^2 \times 10^{-3}$ ) for  $\text{C}_{18}\text{H}_{30}\text{N}_2\text{O}_2$  (2g)**

|        | x        | y        | z       | U(eq) |
|--------|----------|----------|---------|-------|
| H(1O)  | 120(20)  | 6516(10) | 1925(9) | 40    |
| H(1N)  | 1270(20) | 7029(10) | 580(8)  | 39    |
| H(3)   | -124     | 8263     | 4553    | 40    |
| H(4)   | 624      | 9497     | 3768    | 45    |
| H(5)   | 968      | 9357     | 2347    | 43    |
| H(7A)  | -720     | 7951     | 1131    | 43    |
| H(7B)  | 1166     | 8461     | 1142    | 43    |
| H(8)   | 3360(20) | 6950(10) | 1952(8) | 35    |
| H(10A) | 4172     | 8227     | 2836    | 67    |
| H(10B) | 6260     | 8473     | 2832    | 67    |
| H(10C) | 5627     | 7481     | 2612    | 67    |
| H(11A) | 6098     | 9250     | 871     | 72    |
| H(11B) | 7277     | 9215     | 1692    | 72    |
| H(11C) | 5365     | 9700     | 1697    | 72    |
| H(13A) | 2038     | 6088     | 4194    | 60    |
| H(13B) | 919      | 5640     | 3463    | 60    |

|        |       |      |      |    |
|--------|-------|------|------|----|
| H(13C) | 642   | 5304 | 4388 | 60 |
| H(14A) | -2422 | 5956 | 3340 | 60 |
| H(14B) | -3382 | 6543 | 4034 | 60 |
| H(14C) | -2634 | 5570 | 4252 | 60 |
| H(15A) | 476   | 7006 | 5249 | 57 |
| H(15B) | -899  | 6202 | 5398 | 57 |
| H(15C) | -1637 | 7178 | 5183 | 57 |
| H(16)  | 4036  | 6315 | 326  | 42 |
| H(17A) | 6744  | 6690 | 987  | 81 |
| H(17B) | 6628  | 5639 | 821  | 81 |
| H(17C) | 6263  | 6024 | 1723 | 81 |
| H(18A) | 1839  | 5468 | 1017 | 84 |
| H(18B) | 3226  | 5271 | 1745 | 84 |
| H(18C) | 3590  | 4880 | 845  | 84 |

**Table 6. Torsion angles [°] for C<sub>18</sub>H<sub>30</sub>N<sub>2</sub>O<sub>2</sub> (2g)**

|                      |             |
|----------------------|-------------|
| O(1)-C(1)-C(2)-C(3)  | -178.35(11) |
| C(6)-C(1)-C(2)-C(3)  | 1.33(17)    |
| O(1)-C(1)-C(2)-C(12) | 3.12(18)    |
| C(6)-C(1)-C(2)-C(12) | -177.20(11) |
| C(1)-C(2)-C(3)-C(4)  | -1.86(19)   |
| C(12)-C(2)-C(3)-C(4) | 176.65(12)  |
| C(2)-C(3)-C(4)-C(5)  | 0.8(2)      |
| C(3)-C(4)-C(5)-C(6)  | 0.9(2)      |
| C(4)-C(5)-C(6)-C(1)  | -1.42(19)   |
| C(4)-C(5)-C(6)-C(7)  | 177.15(12)  |
| O(1)-C(1)-C(6)-C(5)  | 179.94(11)  |
| C(2)-C(1)-C(6)-C(5)  | 0.27(18)    |
| O(1)-C(1)-C(6)-C(7)  | 1.36(17)    |
| C(2)-C(1)-C(6)-C(7)  | -178.31(12) |
| C(8)-N(1)-C(7)-C(6)  | -65.06(14)  |
| C(5)-C(6)-C(7)-N(1)  | 139.83(12)  |
| C(1)-C(6)-C(7)-N(1)  | -41.61(16)  |

|                       |             |
|-----------------------|-------------|
| C(7)-N(1)-C(8)-C(9)   | -48.44(13)  |
| C(7)-N(1)-C(8)-C(16)  | -170.73(10) |
| C(11)-N(2)-C(9)-O(2)  | 3.13(19)    |
| C(10)-N(2)-C(9)-O(2)  | -178.84(13) |
| C(11)-N(2)-C(9)-C(8)  | -175.71(12) |
| C(10)-N(2)-C(9)-C(8)  | 2.32(19)    |
| N(1)-C(8)-C(9)-O(2)   | -56.90(15)  |
| C(16)-C(8)-C(9)-O(2)  | 64.87(15)   |
| N(1)-C(8)-C(9)-N(2)   | 121.98(12)  |
| C(16)-C(8)-C(9)-N(2)  | -116.25(13) |
| C(3)-C(2)-C(12)-C(14) | 119.40(13)  |
| C(1)-C(2)-C(12)-C(14) | -62.15(15)  |
| C(3)-C(2)-C(12)-C(13) | -119.37(13) |
| C(1)-C(2)-C(12)-C(13) | 59.08(16)   |
| C(3)-C(2)-C(12)-C(15) | -0.49(17)   |
| C(1)-C(2)-C(12)-C(15) | 177.96(12)  |
| N(1)-C(8)-C(16)-C(17) | 178.59(12)  |
| C(9)-C(8)-C(16)-C(17) | 56.14(15)   |
| N(1)-C(8)-C(16)-C(18) | -56.50(15)  |
| C(9)-C(8)-C(16)-C(18) | -178.95(13) |

---

Symmetry transformations used to generate equivalent atoms:

**Table 7. Hydrogen bonds for C<sub>18</sub>H<sub>30</sub>N<sub>2</sub>O<sub>2</sub> (2g) [Å and °]**

| D-H...A             | d(D-H)    | d(H...A)  | d(D...A)   | <(DHA)    |
|---------------------|-----------|-----------|------------|-----------|
| O(1)-H(1O)...N(1)   | 0.839(13) | 1.860(14) | 2.6297(14) | 151.9(15) |
| N(1)-H(1N)...O(2)#1 | 0.898(13) | 2.167(14) | 2.9439(14) | 144.4(14) |

---

Symmetry transformations used to generate equivalent atoms:

#1 x-1/2,-y+3/2,-z

**X-ray Crystal Structure of S7 (Not shown in manuscript; see Chart S1 in Part A of the Supplementary Information)**

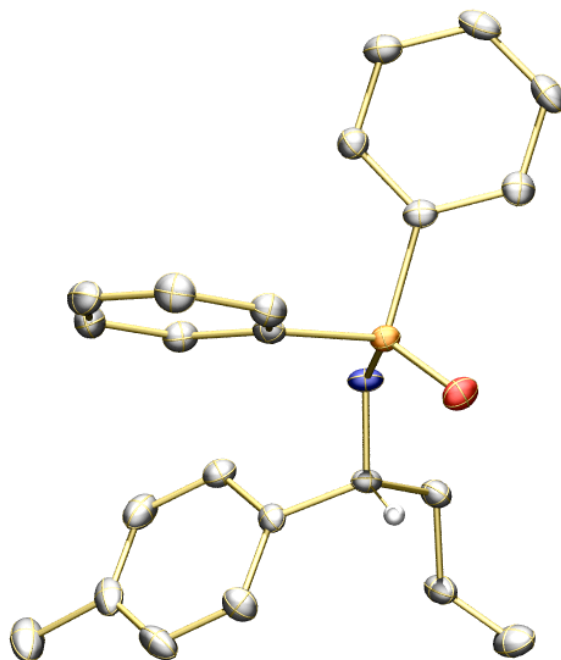

**Table 1. Crystal data and structure refinement for C<sub>23</sub>H<sub>24</sub>NOP (S7)**

|                        |                                     |                 |
|------------------------|-------------------------------------|-----------------|
| Identification code    | C <sub>23</sub> H <sub>24</sub> NOP |                 |
| Empirical formula      | C <sub>23</sub> H <sub>24</sub> NOP |                 |
| Formula weight         | 361.40                              |                 |
| Temperature            | 100(2) K                            |                 |
| Wavelength             | 0.71073 Å                           |                 |
| Crystal system         | Monoclinic                          |                 |
| Space group            | P 2(1)                              |                 |
| Unit cell dimensions   | a = 9.9115(7) Å                     | α = 90°         |
|                        | b = 19.7080(12) Å                   | β = 101.997(4)° |
|                        | c = 10.2367(7) Å                    | γ = 90°         |
| Volume                 | 1955.9(2) Å <sup>3</sup>            |                 |
| Z                      | 4                                   |                 |
| Density (calculated)   | 1.227 Mg/m <sup>3</sup>             |                 |
| Absorption coefficient | 0.152 mm <sup>-1</sup>              |                 |
| F(000)                 | 768                                 |                 |
| Crystal size           | 0.14 x 0.08 x 0.05 mm <sup>3</sup>  |                 |

|                                   |                                             |
|-----------------------------------|---------------------------------------------|
| Theta range for data collection   | 2.03 to 28.43°                              |
| Index ranges                      | -12<=h<=13, -26<=k<=26, -13<=l<=13          |
| Reflections collected             | 42680                                       |
| Independent reflections           | 9807 [R(int) = 0.0707]                      |
| Completeness to theta = 28.43°    | 99.7 %                                      |
| Absorption correction             | Semi-empirical from equivalents             |
| Max. and min. transmission        | 0.9925 and 0.9791                           |
| Refinement method                 | Full-matrix least-squares on F <sup>2</sup> |
| Data / restraints / parameters    | 9807 / 5 / 483                              |
| Goodness-of-fit on F <sup>2</sup> | 1.019                                       |
| Final R indices [I>2sigma(I)]     | R1 = 0.0419, wR2 = 0.0796                   |
| R indices (all data)              | R1 = 0.0613, wR2 = 0.0867                   |
| Absolute structure parameter      | 0.04(6)                                     |
| Extinction coefficient            | na                                          |
| Largest diff. peak and hole       | 0.360 and -0.247 e.Å <sup>-3</sup>          |

**Table 2. Atomic coordinates ( x 10<sup>4</sup>) and equivalent isotropic displacement parameters (Å<sup>2</sup> x 10<sup>3</sup>) for XXX. U(eq) is defined as one third of the trace of the orthogonalized U<sup>ij</sup> tensor.**

|       | x       | y        | z       | U(eq) |
|-------|---------|----------|---------|-------|
| P(1)  | 9053(1) | 7653(1)  | 1992(1) | 17(1) |
| O(1)  | 8854(2) | 7958(1)  | 634(1)  | 23(1) |
| N(1)  | 8318(2) | 8098(1)  | 2991(2) | 20(1) |
| C(1)  | 9941(3) | 10334(1) | 4205(3) | 45(1) |
| C(2)  | 8899(3) | 9939(1)  | 4126(2) | 32(1) |
| C(3)  | 8960(2) | 9179(1)  | 4177(2) | 25(1) |
| C(4)  | 8168(2) | 8840(1)  | 2881(2) | 19(1) |
| C(5)  | 6664(2) | 9044(1)  | 2560(2) | 20(1) |
| C(6)  | 5698(2) | 8734(1)  | 3176(2) | 23(1) |
| C(7)  | 4332(2) | 8937(1)  | 2895(2) | 26(1) |
| C(8)  | 3876(2) | 9459(1)  | 1984(2) | 29(1) |
| C(9)  | 4839(3) | 9758(1)  | 1368(2) | 30(1) |
| C(10) | 6201(2) | 9557(1)  | 1641(2) | 25(1) |
| C(11) | 2404(3) | 9694(1)  | 1729(3) | 45(1) |



|       |          |         |         |       |
|-------|----------|---------|---------|-------|
| C(12) | 10858(2) | 7526(1) | 2686(2) | 19(1) |
| C(13) | 11354(2) | 7499(1) | 4063(2) | 24(1) |
| C(14) | 12722(2) | 7348(1) | 4577(2) | 28(1) |
| C(15) | 13616(2) | 7227(1) | 3721(2) | 27(1) |
| C(16) | 13136(2) | 7261(1) | 2359(2) | 26(1) |
| C(17) | 11762(2) | 7410(1) | 1837(2) | 22(1) |
| C(18) | 8271(2)  | 6825(1) | 2005(2) | 18(1) |
| C(19) | 9019(2)  | 6240(1) | 2433(2) | 23(1) |
| C(20) | 8367(2)  | 5614(1) | 2356(2) | 26(1) |
| C(21) | 6966(2)  | 5564(1) | 1842(2) | 27(1) |
| C(22) | 6217(2)  | 6140(1) | 1423(2) | 31(1) |
| C(23) | 6856(2)  | 6769(1) | 1504(2) | 26(1) |
| P(2)  | 1823(1)  | 2359(1) | 3130(1) | 15(1) |
| O(2)  | 1432(1)  | 2673(1) | 4319(1) | 22(1) |
| N(2)  | 2302(2)  | 2892(1) | 2097(2) | 18(1) |
| C(24) | 2526(3)  | 5298(1) | 2712(2) | 34(1) |
| C(25) | 3013(2)  | 4794(1) | 2109(2) | 24(1) |
| C(26) | 2293(2)  | 4125(1) | 1794(2) | 22(1) |
| C(27) | 3094(2)  | 3516(1) | 2530(2) | 16(1) |
| C(28) | 4549(2)  | 3499(1) | 2299(2) | 17(1) |
| C(29) | 4824(2)  | 3329(1) | 1062(2) | 22(1) |
| C(30) | 6148(2)  | 3380(1) | 828(2)  | 28(1) |
| C(31) | 7240(2)  | 3607(1) | 1811(2) | 27(1) |
| C(32) | 6966(2)  | 3764(1) | 3047(2) | 28(1) |
| C(33) | 5642(2)  | 3713(1) | 3291(2) | 24(1) |
| C(34) | 8661(3)  | 3702(1) | 1536(3) | 40(1) |
| C(35) | 409(2)   | 1896(1) | 2116(2) | 18(1) |
| C(36) | -925(2)  | 2044(1) | 2252(2) | 21(1) |
| C(37) | -2044(2) | 1693(1) | 1503(2) | 25(1) |
| C(38) | -1821(2) | 1187(1) | 644(2)  | 25(1) |
| C(39) | -496(2)  | 1032(1) | 503(2)  | 24(1) |
| C(40) | 622(2)   | 1388(1) | 1234(2) | 21(1) |
| C(41) | 3159(2)  | 1734(1) | 3632(2) | 18(1) |
| C(42) | 3063(2)  | 1295(1) | 4685(2) | 21(1) |
| C(43) | 3994(2)  | 766(1)  | 5009(2) | 24(1) |
| C(44) | 5029(2)  | 671(1)  | 4313(2) | 24(1) |

|       |         |         |         |       |
|-------|---------|---------|---------|-------|
| C(45) | 5157(2) | 1112(1) | 3295(2) | 24(1) |
| C(46) | 4218(2) | 1640(1) | 2943(2) | 20(1) |

---

**Table 3. Bond lengths [Å] and angles [°] for C<sub>23</sub>H<sub>24</sub>NOP (S7)**

---

|              |            |
|--------------|------------|
| P(1)-O(1)    | 1.4889(14) |
| P(1)-N(1)    | 1.6299(18) |
| P(1)-C(12)   | 1.800(2)   |
| P(1)-C(18)   | 1.806(2)   |
| N(1)-C(4)    | 1.472(2)   |
| N(1)-H(1N)   | 0.855(15)  |
| C(1)-C(2)    | 1.283(3)   |
| C(1)-H(1A)   | 0.9500     |
| C(1)-H(1B)   | 0.9500     |
| C(2)-C(3)    | 1.499(3)   |
| C(2)-H(2)    | 0.9500     |
| C(3)-C(4)    | 1.546(3)   |
| C(3)-H(3A)   | 0.9900     |
| C(3)-H(3B)   | 0.9900     |
| C(4)-C(5)    | 1.512(3)   |
| C(4)-H(4)    | 0.987(16)  |
| C(5)-C(6)    | 1.393(3)   |
| C(5)-C(10)   | 1.393(3)   |
| C(6)-C(7)    | 1.384(3)   |
| C(6)-H(6)    | 0.9500     |
| C(7)-C(8)    | 1.398(3)   |
| C(7)-H(7)    | 0.9500     |
| C(8)-C(9)    | 1.381(4)   |
| C(8)-C(11)   | 1.501(3)   |
| C(9)-C(10)   | 1.378(3)   |
| C(9)-H(9)    | 0.9500     |
| C(10)-H(10)  | 0.9500     |
| C(11)-H(11A) | 0.9800     |
| C(11)-H(11B) | 0.9800     |

|              |            |
|--------------|------------|
| C(11)-H(11C) | 0.9800     |
| C(12)-C(17)  | 1.391(3)   |
| C(12)-C(13)  | 1.393(3)   |
| C(13)-C(14)  | 1.382(3)   |
| C(13)-H(13)  | 0.9500     |
| C(14)-C(15)  | 1.390(3)   |
| C(14)-H(14)  | 0.9500     |
| C(15)-C(16)  | 1.378(3)   |
| C(15)-H(15)  | 0.9500     |
| C(16)-C(17)  | 1.386(3)   |
| C(16)-H(16)  | 0.9500     |
| C(17)-H(17)  | 0.9500     |
| C(18)-C(19)  | 1.393(3)   |
| C(18)-C(23)  | 1.393(3)   |
| C(19)-C(20)  | 1.386(3)   |
| C(19)-H(19)  | 0.9500     |
| C(20)-C(21)  | 1.383(3)   |
| C(20)-H(20)  | 0.9500     |
| C(21)-C(22)  | 1.377(3)   |
| C(21)-H(21)  | 0.9500     |
| C(22)-C(23)  | 1.387(3)   |
| C(22)-H(22)  | 0.9500     |
| C(23)-H(23)  | 0.9500     |
| P(2)-O(2)    | 1.4868(14) |
| P(2)-N(2)    | 1.6297(18) |
| P(2)-C(41)   | 1.803(2)   |
| P(2)-C(35)   | 1.807(2)   |
| N(2)-C(27)   | 1.476(2)   |
| N(2)-H(2N)   | 0.841(15)  |
| C(24)-C(25)  | 1.313(3)   |
| C(24)-H(24A) | 0.9500     |
| C(24)-H(24B) | 0.9500     |
| C(25)-C(26)  | 1.501(3)   |
| C(25)-H(25)  | 0.9500     |
| C(26)-C(27)  | 1.546(3)   |
| C(26)-H(26A) | 0.9900     |

|              |           |
|--------------|-----------|
| C(26)-H(26B) | 0.9900    |
| C(27)-C(28)  | 1.509(3)  |
| C(27)-H(27)  | 1.005(15) |
| C(28)-C(33)  | 1.388(3)  |
| C(28)-C(29)  | 1.390(3)  |
| C(29)-C(30)  | 1.385(3)  |
| C(29)-H(29)  | 0.9500    |
| C(30)-C(31)  | 1.390(3)  |
| C(30)-H(30)  | 0.9500    |
| C(31)-C(32)  | 1.383(3)  |
| C(31)-C(34)  | 1.503(3)  |
| C(32)-C(33)  | 1.390(3)  |
| C(32)-H(32)  | 0.9500    |
| C(33)-H(33)  | 0.9500    |
| C(34)-H(34A) | 0.9800    |
| C(34)-H(34B) | 0.9800    |
| C(34)-H(34C) | 0.9800    |
| C(35)-C(36)  | 1.389(3)  |
| C(35)-C(40)  | 1.393(3)  |
| C(36)-C(37)  | 1.394(3)  |
| C(36)-H(36)  | 0.9500    |
| C(37)-C(38)  | 1.378(3)  |
| C(37)-H(37)  | 0.9500    |
| C(38)-C(39)  | 1.385(3)  |
| C(38)-H(38)  | 0.9500    |
| C(39)-C(40)  | 1.390(3)  |
| C(39)-H(39)  | 0.9500    |
| C(40)-H(40)  | 0.9500    |
| C(41)-C(46)  | 1.393(3)  |
| C(41)-C(42)  | 1.401(3)  |
| C(42)-C(43)  | 1.387(3)  |
| C(42)-H(42)  | 0.9500    |
| C(43)-C(44)  | 1.378(3)  |
| C(43)-H(43)  | 0.9500    |
| C(44)-C(45)  | 1.381(3)  |
| C(44)-H(44)  | 0.9500    |

|                  |            |
|------------------|------------|
| C(45)-C(46)      | 1.393(3)   |
| C(45)-H(45)      | 0.9500     |
| C(46)-H(46)      | 0.9500     |
| O(1)-P(1)-N(1)   | 112.21(9)  |
| O(1)-P(1)-C(12)  | 110.65(9)  |
| N(1)-P(1)-C(12)  | 111.32(9)  |
| O(1)-P(1)-C(18)  | 113.47(9)  |
| N(1)-P(1)-C(18)  | 103.48(9)  |
| C(12)-P(1)-C(18) | 105.33(9)  |
| C(4)-N(1)-P(1)   | 122.62(15) |
| C(4)-N(1)-H(1N)  | 116.6(15)  |
| P(1)-N(1)-H(1N)  | 116.4(15)  |
| C(2)-C(1)-H(1A)  | 120.0      |
| C(2)-C(1)-H(1B)  | 120.0      |
| H(1A)-C(1)-H(1B) | 120.0      |
| C(1)-C(2)-C(3)   | 125.4(2)   |
| C(1)-C(2)-H(2)   | 117.3      |
| C(3)-C(2)-H(2)   | 117.3      |
| C(2)-C(3)-C(4)   | 113.09(17) |
| C(2)-C(3)-H(3A)  | 109.0      |
| C(4)-C(3)-H(3A)  | 109.0      |
| C(2)-C(3)-H(3B)  | 109.0      |
| C(4)-C(3)-H(3B)  | 109.0      |
| H(3A)-C(3)-H(3B) | 107.8      |
| N(1)-C(4)-C(5)   | 111.13(17) |
| N(1)-C(4)-C(3)   | 109.79(16) |
| C(5)-C(4)-C(3)   | 111.93(17) |
| N(1)-C(4)-H(4)   | 107.0(13)  |
| C(5)-C(4)-H(4)   | 110.2(13)  |
| C(3)-C(4)-H(4)   | 106.6(13)  |
| C(6)-C(5)-C(10)  | 117.6(2)   |
| C(6)-C(5)-C(4)   | 121.63(18) |
| C(10)-C(5)-C(4)  | 120.8(2)   |
| C(7)-C(6)-C(5)   | 121.0(2)   |
| C(7)-C(6)-H(6)   | 119.5      |
| C(5)-C(6)-H(6)   | 119.5      |

|                     |            |
|---------------------|------------|
| C(6)-C(7)-C(8)      | 121.2(2)   |
| C(6)-C(7)-H(7)      | 119.4      |
| C(8)-C(7)-H(7)      | 119.4      |
| C(9)-C(8)-C(7)      | 117.5(2)   |
| C(9)-C(8)-C(11)     | 121.8(2)   |
| C(7)-C(8)-C(11)     | 120.7(2)   |
| C(10)-C(9)-C(8)     | 121.6(2)   |
| C(10)-C(9)-H(9)     | 119.2      |
| C(8)-C(9)-H(9)      | 119.2      |
| C(9)-C(10)-C(5)     | 121.2(2)   |
| C(9)-C(10)-H(10)    | 119.4      |
| C(5)-C(10)-H(10)    | 119.4      |
| C(8)-C(11)-H(11A)   | 109.5      |
| C(8)-C(11)-H(11B)   | 109.5      |
| H(11A)-C(11)-H(11B) | 109.5      |
| C(8)-C(11)-H(11C)   | 109.5      |
| H(11A)-C(11)-H(11C) | 109.5      |
| H(11B)-C(11)-H(11C) | 109.5      |
| C(17)-C(12)-C(13)   | 119.24(18) |
| C(17)-C(12)-P(1)    | 119.50(15) |
| C(13)-C(12)-P(1)    | 121.14(16) |
| C(14)-C(13)-C(12)   | 120.3(2)   |
| C(14)-C(13)-H(13)   | 119.8      |
| C(12)-C(13)-H(13)   | 119.8      |
| C(13)-C(14)-C(15)   | 120.0(2)   |
| C(13)-C(14)-H(14)   | 120.0      |
| C(15)-C(14)-H(14)   | 120.0      |
| C(16)-C(15)-C(14)   | 119.9(2)   |
| C(16)-C(15)-H(15)   | 120.0      |
| C(14)-C(15)-H(15)   | 120.0      |
| C(15)-C(16)-C(17)   | 120.3(2)   |
| C(15)-C(16)-H(16)   | 119.8      |
| C(17)-C(16)-H(16)   | 119.8      |
| C(16)-C(17)-C(12)   | 120.15(19) |
| C(16)-C(17)-H(17)   | 119.9      |
| C(12)-C(17)-H(17)   | 119.9      |

|                     |            |
|---------------------|------------|
| C(19)-C(18)-C(23)   | 118.62(19) |
| C(19)-C(18)-P(1)    | 123.33(16) |
| C(23)-C(18)-P(1)    | 117.98(15) |
| C(20)-C(19)-C(18)   | 120.6(2)   |
| C(20)-C(19)-H(19)   | 119.7      |
| C(18)-C(19)-H(19)   | 119.7      |
| C(21)-C(20)-C(19)   | 120.3(2)   |
| C(21)-C(20)-H(20)   | 119.8      |
| C(19)-C(20)-H(20)   | 119.8      |
| C(22)-C(21)-C(20)   | 119.6(2)   |
| C(22)-C(21)-H(21)   | 120.2      |
| C(20)-C(21)-H(21)   | 120.2      |
| C(21)-C(22)-C(23)   | 120.6(2)   |
| C(21)-C(22)-H(22)   | 119.7      |
| C(23)-C(22)-H(22)   | 119.7      |
| C(22)-C(23)-C(18)   | 120.3(2)   |
| C(22)-C(23)-H(23)   | 119.8      |
| C(18)-C(23)-H(23)   | 119.8      |
| O(2)-P(2)-N(2)      | 115.09(9)  |
| O(2)-P(2)-C(41)     | 110.59(9)  |
| N(2)-P(2)-C(41)     | 109.20(10) |
| O(2)-P(2)-C(35)     | 112.16(9)  |
| N(2)-P(2)-C(35)     | 104.38(9)  |
| C(41)-P(2)-C(35)    | 104.77(9)  |
| C(27)-N(2)-P(2)     | 123.38(13) |
| C(27)-N(2)-H(2N)    | 117.9(15)  |
| P(2)-N(2)-H(2N)     | 117.0(15)  |
| C(25)-C(24)-H(24A)  | 120.0      |
| C(25)-C(24)-H(24B)  | 120.0      |
| H(24A)-C(24)-H(24B) | 120.0      |
| C(24)-C(25)-C(26)   | 124.1(2)   |
| C(24)-C(25)-H(25)   | 117.9      |
| C(26)-C(25)-H(25)   | 117.9      |
| C(25)-C(26)-C(27)   | 113.86(16) |
| C(25)-C(26)-H(26A)  | 108.8      |
| C(27)-C(26)-H(26A)  | 108.8      |

|                     |            |
|---------------------|------------|
| C(25)-C(26)-H(26B)  | 108.8      |
| C(27)-C(26)-H(26B)  | 108.8      |
| H(26A)-C(26)-H(26B) | 107.7      |
| N(2)-C(27)-C(28)    | 113.55(16) |
| N(2)-C(27)-C(26)    | 108.28(15) |
| C(28)-C(27)-C(26)   | 110.55(16) |
| N(2)-C(27)-H(27)    | 104.8(12)  |
| C(28)-C(27)-H(27)   | 112.6(12)  |
| C(26)-C(27)-H(27)   | 106.6(12)  |
| C(33)-C(28)-C(29)   | 117.90(19) |
| C(33)-C(28)-C(27)   | 120.33(18) |
| C(29)-C(28)-C(27)   | 121.52(18) |
| C(30)-C(29)-C(28)   | 120.8(2)   |
| C(30)-C(29)-H(29)   | 119.6      |
| C(28)-C(29)-H(29)   | 119.6      |
| C(29)-C(30)-C(31)   | 121.5(2)   |
| C(29)-C(30)-H(30)   | 119.3      |
| C(31)-C(30)-H(30)   | 119.3      |
| C(32)-C(31)-C(30)   | 117.5(2)   |
| C(32)-C(31)-C(34)   | 120.9(2)   |
| C(30)-C(31)-C(34)   | 121.6(2)   |
| C(31)-C(32)-C(33)   | 121.4(2)   |
| C(31)-C(32)-H(32)   | 119.3      |
| C(33)-C(32)-H(32)   | 119.3      |
| C(28)-C(33)-C(32)   | 120.9(2)   |
| C(28)-C(33)-H(33)   | 119.5      |
| C(32)-C(33)-H(33)   | 119.5      |
| C(31)-C(34)-H(34A)  | 109.5      |
| C(31)-C(34)-H(34B)  | 109.5      |
| H(34A)-C(34)-H(34B) | 109.5      |
| C(31)-C(34)-H(34C)  | 109.5      |
| H(34A)-C(34)-H(34C) | 109.5      |
| H(34B)-C(34)-H(34C) | 109.5      |
| C(36)-C(35)-C(40)   | 119.42(19) |
| C(36)-C(35)-P(2)    | 118.47(15) |
| C(40)-C(35)-P(2)    | 122.09(16) |



|                   |            |
|-------------------|------------|
| C(35)-C(36)-C(37) | 120.3(2)   |
| C(35)-C(36)-H(36) | 119.8      |
| C(37)-C(36)-H(36) | 119.8      |
| C(38)-C(37)-C(36) | 119.7(2)   |
| C(38)-C(37)-H(37) | 120.1      |
| C(36)-C(37)-H(37) | 120.1      |
| C(37)-C(38)-C(39) | 120.5(2)   |
| C(37)-C(38)-H(38) | 119.8      |
| C(39)-C(38)-H(38) | 119.8      |
| C(38)-C(39)-C(40) | 120.0(2)   |
| C(38)-C(39)-H(39) | 120.0      |
| C(40)-C(39)-H(39) | 120.0      |
| C(39)-C(40)-C(35) | 120.0(2)   |
| C(39)-C(40)-H(40) | 120.0      |
| C(35)-C(40)-H(40) | 120.0      |
| C(46)-C(41)-C(42) | 119.07(19) |
| C(46)-C(41)-P(2)  | 122.18(15) |
| C(42)-C(41)-P(2)  | 118.55(16) |
| C(43)-C(42)-C(41) | 120.0(2)   |
| C(43)-C(42)-H(42) | 120.0      |
| C(41)-C(42)-H(42) | 120.0      |
| C(44)-C(43)-C(42) | 120.5(2)   |
| C(44)-C(43)-H(43) | 119.8      |
| C(42)-C(43)-H(43) | 119.8      |
| C(43)-C(44)-C(45) | 120.0(2)   |
| C(43)-C(44)-H(44) | 120.0      |
| C(45)-C(44)-H(44) | 120.0      |
| C(44)-C(45)-C(46) | 120.3(2)   |
| C(44)-C(45)-H(45) | 119.9      |
| C(46)-C(45)-H(45) | 119.9      |
| C(41)-C(46)-C(45) | 120.1(2)   |
| C(41)-C(46)-H(46) | 120.0      |
| C(45)-C(46)-H(46) | 120.0      |

---

Symmetry transformations used to generate equivalent atoms:

**Table 4. Anisotropic displacement parameters ( $\text{\AA}^2 \times 10^3$ ) for  $\text{C}_{23}\text{H}_{24}\text{NOP}$  (S7). The anisotropic displacement factor exponent takes the form:  $-2p^2[h^2 a^{*2}U^{11} + \dots + 2hk a^* b^* U^{12}]$**

|       | U11   | U22   | U33   | U23   | U13   | U12   |
|-------|-------|-------|-------|-------|-------|-------|
| P(1)  | 19(1) | 17(1) | 12(1) | 1(1)  | 1(1)  | 4(1)  |
| O(1)  | 28(1) | 26(1) | 14(1) | 2(1)  | 2(1)  | 3(1)  |
| N(1)  | 28(1) | 16(1) | 15(1) | 4(1)  | 5(1)  | 5(1)  |
| C(1)  | 51(2) | 38(1) | 42(2) | 5(1)  | 4(1)  | -8(1) |
| C(2)  | 35(1) | 25(1) | 32(1) | -2(1) | -5(1) | 1(1)  |
| C(3)  | 28(1) | 20(1) | 23(1) | 1(1)  | 0(1)  | 2(1)  |
| C(4)  | 27(1) | 15(1) | 16(1) | 2(1)  | 5(1)  | 3(1)  |
| C(5)  | 29(1) | 15(1) | 13(1) | -4(1) | 0(1)  | 2(1)  |
| C(6)  | 30(1) | 18(1) | 20(1) | 2(1)  | 2(1)  | 3(1)  |
| C(7)  | 29(1) | 24(1) | 26(1) | -5(1) | 4(1)  | 0(1)  |
| C(8)  | 30(1) | 27(1) | 26(1) | -4(1) | -3(1) | 9(1)  |
| C(9)  | 41(1) | 22(1) | 24(1) | 1(1)  | -1(1) | 11(1) |
| C(10) | 36(1) | 19(1) | 18(1) | 0(1)  | 3(1)  | 4(1)  |
| C(11) | 32(2) | 49(2) | 49(2) | -3(1) | -2(1) | 18(1) |
| C(12) | 22(1) | 14(1) | 20(1) | -1(1) | 2(1)  | 1(1)  |
| C(13) | 25(1) | 24(1) | 22(1) | 0(1)  | 1(1)  | 3(1)  |
| C(14) | 28(1) | 25(1) | 26(1) | 3(1)  | -4(1) | 3(1)  |
| C(15) | 17(1) | 19(1) | 42(1) | 1(1)  | -2(1) | 2(1)  |
| C(16) | 23(1) | 22(1) | 36(1) | 0(1)  | 11(1) | 0(1)  |
| C(17) | 26(1) | 18(1) | 21(1) | -1(1) | 3(1)  | -1(1) |
| C(18) | 24(1) | 18(1) | 13(1) | -2(1) | 5(1)  | 3(1)  |
| C(19) | 23(1) | 22(1) | 23(1) | 0(1)  | 3(1)  | 3(1)  |
| C(20) | 30(1) | 20(1) | 26(1) | 0(1)  | 4(1)  | 4(1)  |
| C(21) | 34(1) | 21(1) | 25(1) | -5(1) | 6(1)  | -7(1) |
| C(22) | 22(1) | 30(1) | 37(1) | -1(1) | -2(1) | -4(1) |
| C(23) | 24(1) | 21(1) | 30(1) | 1(1)  | -1(1) | 4(1)  |
| P(2)  | 18(1) | 15(1) | 13(1) | 0(1)  | 2(1)  | -1(1) |
| O(2)  | 28(1) | 22(1) | 16(1) | -2(1) | 7(1)  | 0(1)  |
| N(2)  | 23(1) | 16(1) | 13(1) | -1(1) | 0(1)  | -5(1) |
| C(24) | 39(1) | 21(1) | 38(1) | -3(1) | -2(1) | 1(1)  |

|       |       |       |       |       |       |       |
|-------|-------|-------|-------|-------|-------|-------|
| C(25) | 20(1) | 20(1) | 31(1) | 1(1)  | 0(1)  | -2(1) |
| C(26) | 18(1) | 21(1) | 26(1) | -1(1) | -1(1) | -1(1) |
| C(27) | 18(1) | 17(1) | 14(1) | -2(1) | 2(1)  | -4(1) |
| C(28) | 18(1) | 14(1) | 20(1) | 3(1)  | 3(1)  | 1(1)  |
| C(29) | 27(1) | 17(1) | 23(1) | -1(1) | 5(1)  | -1(1) |
| C(30) | 36(1) | 22(1) | 31(1) | -1(1) | 17(1) | 0(1)  |
| C(31) | 23(1) | 16(1) | 44(1) | 8(1)  | 12(1) | 3(1)  |
| C(32) | 20(1) | 28(1) | 34(1) | 8(1)  | -4(1) | -4(1) |
| C(33) | 23(1) | 27(1) | 20(1) | 4(1)  | 1(1)  | 0(1)  |
| C(34) | 29(1) | 26(1) | 68(2) | 7(1)  | 21(1) | -1(1) |
| C(35) | 23(1) | 15(1) | 16(1) | 3(1)  | 3(1)  | -2(1) |
| C(36) | 23(1) | 19(1) | 21(1) | 5(1)  | 8(1)  | 0(1)  |
| C(37) | 16(1) | 29(1) | 30(1) | 9(1)  | 4(1)  | -2(1) |
| C(38) | 23(1) | 24(1) | 26(1) | 7(1)  | -3(1) | -9(1) |
| C(39) | 28(1) | 20(1) | 22(1) | -1(1) | 0(1)  | -3(1) |
| C(40) | 20(1) | 20(1) | 22(1) | 1(1)  | 4(1)  | 0(1)  |
| C(41) | 17(1) | 18(1) | 15(1) | -2(1) | -2(1) | -2(1) |
| C(42) | 22(1) | 23(1) | 19(1) | 1(1)  | 4(1)  | -1(1) |
| C(43) | 29(1) | 24(1) | 19(1) | 6(1)  | 3(1)  | 0(1)  |
| C(44) | 24(1) | 18(1) | 27(1) | 0(1)  | 0(1)  | 2(1)  |
| C(45) | 19(1) | 23(1) | 31(1) | -4(1) | 7(1)  | 0(1)  |
| C(46) | 24(1) | 20(1) | 18(1) | 0(1)  | 5(1)  | -3(1) |

**Table 5. Hydrogen coordinates ( $\times 10^4$ ) and isotropic displacement parameters ( $\text{\AA}^2 \times 10^3$ ) for  $\text{C}_{23}\text{H}_{24}\text{NOP}$  (S7)**

|       | x        | y        | z        | U(eq) |
|-------|----------|----------|----------|-------|
| H(1N) | 8320(20) | 7925(11) | 3756(17) | 24    |
| H(1A) | 10842    | 10150    | 4305     | 54    |
| H(1B) | 9812     | 10812    | 4164     | 54    |
| H(2)  | 8017     | 10144    | 4027     | 39    |
| H(3A) | 8569     | 9020     | 4937     | 30    |
| H(3B) | 9937     | 9034     | 4341     | 30    |

|        |          |          |          |    |
|--------|----------|----------|----------|----|
| H(4)   | 8630(20) | 8986(11) | 2160(19) | 23 |
| H(6)   | 5981     | 8378     | 3798     | 28 |
| H(7)   | 3691     | 8718     | 3329     | 32 |
| H(9)   | 4556     | 10112    | 740      | 36 |
| H(10)  | 6834     | 9772     | 1194     | 30 |
| H(11A) | 2303     | 10045    | 2381     | 67 |
| H(11B) | 1802     | 9310     | 1815     | 67 |
| H(11C) | 2147     | 9882     | 825      | 67 |
| H(13)  | 10747    | 7586     | 4651     | 29 |
| H(14)  | 13053    | 7327     | 5516     | 33 |
| H(15)  | 14556    | 7122     | 4074     | 33 |
| H(16)  | 13749    | 7181     | 1775     | 32 |
| H(17)  | 11438    | 7433     | 897      | 26 |
| H(19)  | 9983     | 6269     | 2780     | 28 |
| H(20)  | 8886     | 5218     | 2659     | 31 |
| H(21)  | 6524     | 5134     | 1779     | 32 |
| H(22)  | 5253     | 6107     | 1074     | 37 |
| H(23)  | 6327     | 7164     | 1216     | 31 |
| H(2N)  | 1920(20) | 2858(11) | 1287(16) | 22 |
| H(24A) | 1668     | 5252     | 2977     | 41 |
| H(24B) | 3033     | 5709     | 2882     | 41 |
| H(25)  | 3874     | 4856     | 1857     | 29 |
| H(26A) | 2142     | 4045     | 820      | 27 |
| H(26B) | 1377     | 4150     | 2035     | 27 |
| H(27)  | 3060(20) | 3566(10) | 3500(16) | 20 |
| H(29)  | 4096     | 3176     | 369      | 27 |
| H(30)  | 6312     | 3256     | -22      | 34 |
| H(32)  | 7698     | 3910     | 3743     | 34 |
| H(33)  | 5484     | 3825     | 4148     | 29 |
| H(34A) | 8775     | 4174     | 1278     | 60 |
| H(34B) | 8781     | 3399     | 808      | 60 |
| H(34C) | 9352     | 3593     | 2342     | 60 |
| H(36)  | -1076    | 2387     | 2858     | 25 |
| H(37)  | -2956    | 1802     | 1584     | 30 |
| H(38)  | -2582    | 942      | 146      | 30 |
| H(39)  | -350     | 683      | -92      | 29 |

|       |      |      |      |    |
|-------|------|------|------|----|
| H(40) | 1530 | 1285 | 1131 | 25 |
| H(42) | 2358 | 1359 | 5176 | 26 |
| H(43) | 3918 | 466  | 5717 | 29 |
| H(44) | 5655 | 304  | 4532 | 29 |
| H(45) | 5887 | 1053 | 2834 | 29 |
| H(46) | 4301 | 1937 | 2233 | 25 |

---

**Table 6. Torsion angles [°] for C<sub>23</sub>H<sub>24</sub>NOP (S7)**

---

|                        |             |
|------------------------|-------------|
| O(1)-P(1)-N(1)-C(4)    | -31.06(19)  |
| C(12)-P(1)-N(1)-C(4)   | 93.57(17)   |
| C(18)-P(1)-N(1)-C(4)   | -153.76(16) |
| C(1)-C(2)-C(3)-C(4)    | -117.7(3)   |
| P(1)-N(1)-C(4)-C(5)    | 117.35(18)  |
| P(1)-N(1)-C(4)-C(3)    | -118.27(18) |
| C(2)-C(3)-C(4)-N(1)    | 177.94(19)  |
| C(2)-C(3)-C(4)-C(5)    | -58.2(3)    |
| N(1)-C(4)-C(5)-C(6)    | 41.9(3)     |
| C(3)-C(4)-C(5)-C(6)    | -81.2(2)    |
| N(1)-C(4)-C(5)-C(10)   | -138.74(19) |
| C(3)-C(4)-C(5)-C(10)   | 98.1(2)     |
| C(10)-C(5)-C(6)-C(7)   | -0.9(3)     |
| C(4)-C(5)-C(6)-C(7)    | 178.47(19)  |
| C(5)-C(6)-C(7)-C(8)    | 0.1(3)      |
| C(6)-C(7)-C(8)-C(9)    | 0.6(3)      |
| C(6)-C(7)-C(8)-C(11)   | -177.5(2)   |
| C(7)-C(8)-C(9)-C(10)   | -0.4(3)     |
| C(11)-C(8)-C(9)-C(10)  | 177.6(2)    |
| C(8)-C(9)-C(10)-C(5)   | -0.4(3)     |
| C(6)-C(5)-C(10)-C(9)   | 1.1(3)      |
| C(4)-C(5)-C(10)-C(9)   | -178.31(19) |
| O(1)-P(1)-C(12)-C(17)  | -28.89(18)  |
| N(1)-P(1)-C(12)-C(17)  | -154.39(15) |
| C(18)-P(1)-C(12)-C(17) | 94.11(17)   |

|                         |             |
|-------------------------|-------------|
| O(1)-P(1)-C(12)-C(13)   | 155.11(15)  |
| N(1)-P(1)-C(12)-C(13)   | 29.61(19)   |
| C(18)-P(1)-C(12)-C(13)  | -81.89(17)  |
| C(17)-C(12)-C(13)-C(14) | -1.1(3)     |
| P(1)-C(12)-C(13)-C(14)  | 174.89(16)  |
| C(12)-C(13)-C(14)-C(15) | 0.5(3)      |
| C(13)-C(14)-C(15)-C(16) | 0.2(3)      |
| C(14)-C(15)-C(16)-C(17) | -0.4(3)     |
| C(15)-C(16)-C(17)-C(12) | -0.2(3)     |
| C(13)-C(12)-C(17)-C(16) | 0.9(3)      |
| P(1)-C(12)-C(17)-C(16)  | -175.13(15) |
| O(1)-P(1)-C(18)-C(19)   | 118.70(18)  |
| N(1)-P(1)-C(18)-C(19)   | -119.45(18) |
| C(12)-P(1)-C(18)-C(19)  | -2.5(2)     |
| O(1)-P(1)-C(18)-C(23)   | -58.24(19)  |
| N(1)-P(1)-C(18)-C(23)   | 63.61(18)   |
| C(12)-P(1)-C(18)-C(23)  | -179.42(16) |
| C(23)-C(18)-C(19)-C(20) | 0.2(3)      |
| P(1)-C(18)-C(19)-C(20)  | -176.75(17) |
| C(18)-C(19)-C(20)-C(21) | 0.6(3)      |
| C(19)-C(20)-C(21)-C(22) | -0.9(3)     |
| C(20)-C(21)-C(22)-C(23) | 0.4(4)      |
| C(21)-C(22)-C(23)-C(18) | 0.4(4)      |
| C(19)-C(18)-C(23)-C(22) | -0.7(3)     |
| P(1)-C(18)-C(23)-C(22)  | 176.43(18)  |
| O(2)-P(2)-N(2)-C(27)    | 35.84(19)   |
| C(41)-P(2)-N(2)-C(27)   | -89.21(17)  |
| C(35)-P(2)-N(2)-C(27)   | 159.20(16)  |
| C(24)-C(25)-C(26)-C(27) | -116.1(2)   |
| P(2)-N(2)-C(27)-C(28)   | 111.83(18)  |
| P(2)-N(2)-C(27)-C(26)   | -124.99(17) |
| C(25)-C(26)-C(27)-N(2)  | -177.98(18) |
| C(25)-C(26)-C(27)-C(28) | -53.0(2)    |
| N(2)-C(27)-C(28)-C(33)  | -134.69(19) |
| C(26)-C(27)-C(28)-C(33) | 103.4(2)    |
| N(2)-C(27)-C(28)-C(29)  | 51.1(2)     |

|                         |             |
|-------------------------|-------------|
| C(26)-C(27)-C(28)-C(29) | -70.9(2)    |
| C(33)-C(28)-C(29)-C(30) | -0.7(3)     |
| C(27)-C(28)-C(29)-C(30) | 173.62(19)  |
| C(28)-C(29)-C(30)-C(31) | -0.6(3)     |
| C(29)-C(30)-C(31)-C(32) | 1.7(3)      |
| C(29)-C(30)-C(31)-C(34) | -176.4(2)   |
| C(30)-C(31)-C(32)-C(33) | -1.6(3)     |
| C(34)-C(31)-C(32)-C(33) | 176.6(2)    |
| C(29)-C(28)-C(33)-C(32) | 0.9(3)      |
| C(27)-C(28)-C(33)-C(32) | -173.51(19) |
| C(31)-C(32)-C(33)-C(28) | 0.2(3)      |
| O(2)-P(2)-C(35)-C(36)   | 20.04(18)   |
| N(2)-P(2)-C(35)-C(36)   | -105.21(16) |
| C(41)-P(2)-C(35)-C(36)  | 140.04(16)  |
| O(2)-P(2)-C(35)-C(40)   | -158.36(15) |
| N(2)-P(2)-C(35)-C(40)   | 76.39(18)   |
| C(41)-P(2)-C(35)-C(40)  | -38.36(19)  |
| C(40)-C(35)-C(36)-C(37) | -0.7(3)     |
| P(2)-C(35)-C(36)-C(37)  | -179.10(15) |
| C(35)-C(36)-C(37)-C(38) | 1.4(3)      |
| C(36)-C(37)-C(38)-C(39) | -1.1(3)     |
| C(37)-C(38)-C(39)-C(40) | 0.2(3)      |
| C(38)-C(39)-C(40)-C(35) | 0.5(3)      |
| C(36)-C(35)-C(40)-C(39) | -0.3(3)     |
| P(2)-C(35)-C(40)-C(39)  | 178.10(16)  |
| O(2)-P(2)-C(41)-C(46)   | -143.20(16) |
| N(2)-P(2)-C(41)-C(46)   | -15.57(19)  |
| C(35)-P(2)-C(41)-C(46)  | 95.76(18)   |
| O(2)-P(2)-C(41)-C(42)   | 41.95(18)   |
| N(2)-P(2)-C(41)-C(42)   | 169.58(15)  |
| C(35)-P(2)-C(41)-C(42)  | -79.09(17)  |
| C(46)-C(41)-C(42)-C(43) | -1.5(3)     |
| P(2)-C(41)-C(42)-C(43)  | 173.55(16)  |
| C(41)-C(42)-C(43)-C(44) | 0.7(3)      |
| C(42)-C(43)-C(44)-C(45) | 0.9(3)      |
| C(43)-C(44)-C(45)-C(46) | -1.8(3)     |

|                         |             |
|-------------------------|-------------|
| C(42)-C(41)-C(46)-C(45) | 0.6(3)      |
| P(2)-C(41)-C(46)-C(45)  | -174.26(15) |
| C(44)-C(45)-C(46)-C(41) | 1.1(3)      |

Symmetry transformations used to generate equivalent atoms:

**Table 7. Hydrogen bonds for C<sub>23</sub>H<sub>24</sub>NOP (S7) [Å and °]**

| D-H...A             | d(D-H)    | d(H...A)  | d(D...A) | <(DHA) |
|---------------------|-----------|-----------|----------|--------|
| N(1)-H(1N)...O(2)#1 | 0.855(15) | 1.998(16) | 2.840(2) | 169(2) |
| N(2)-H(2N)...O(1)#2 | 0.841(15) | 1.966(16) | 2.796(2) | 169(2) |

Symmetry transformations used to generate equivalent atoms:

#1 -x+1,y+1/2,-z+1 #2 -x+1,y-1/2,-z

#### X-ray Crystal Structure of S12 (Table 4)

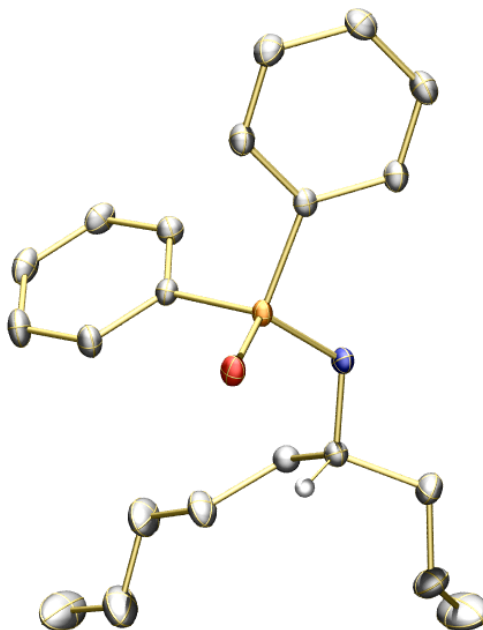

**Table 1. Crystal data and structure refinement for C<sub>21</sub>H<sub>26</sub>NOP (S12)**



|                                   |                                             |                |
|-----------------------------------|---------------------------------------------|----------------|
| Identification code               | C <sub>21</sub> H <sub>26</sub> NOP         |                |
| Empirical formula                 | C <sub>21</sub> H <sub>26</sub> NOP         |                |
| Formula weight                    | 339.40                                      |                |
| Temperature                       | 100(2) K                                    |                |
| Wavelength                        | 0.71073 Å                                   |                |
| Crystal system                    | Monoclinic                                  |                |
| Space group                       | P 2(1)                                      |                |
| Unit cell dimensions              | a = 5.3475(3) Å                             | α = 90°        |
|                                   | b = 8.4812(4) Å                             | β = 91.983(2)° |
|                                   | c = 21.2781(10) Å                           | γ = 90°        |
| Volume                            | 964.45(8) Å <sup>3</sup>                    |                |
| Z                                 | 2                                           |                |
| Density (calculated)              | 1.169 Mg/m <sup>3</sup>                     |                |
| Absorption coefficient            | 0.149 mm <sup>-1</sup>                      |                |
| F(000)                            | 364                                         |                |
| Crystal size                      | 0.30 x 0.24 x 0.08 mm <sup>3</sup>          |                |
| Theta range for data collection   | 1.92 to 28.48°                              |                |
| Index ranges                      | -7 ≤ h ≤ 7, -11 ≤ k ≤ 11, -28 ≤ l ≤ 28      |                |
| Reflections collected             | 39105                                       |                |
| Independent reflections           | 4895 [R(int) = 0.0215]                      |                |
| Completeness to theta = 28.48°    | 99.9 %                                      |                |
| Absorption correction             | Semi-empirical from equivalents             |                |
| Max. and min. transmission        | 0.9882 and 0.9566                           |                |
| Refinement method                 | Full-matrix least-squares on F <sup>2</sup> |                |
| Data / restraints / parameters    | 4895 / 77 / 253                             |                |
| Goodness-of-fit on F <sup>2</sup> | 1.069                                       |                |
| Final R indices [I > 2σ(I)]       | R1 = 0.0273, wR2 = 0.0718                   |                |
| R indices (all data)              | R1 = 0.0278, wR2 = 0.0722                   |                |
| Absolute structure parameter      | 0.00(5)                                     |                |
| Extinction coefficient            | na                                          |                |
| Largest diff. peak and hole       | 0.404 and -0.262 e.Å <sup>-3</sup>          |                |

**Table 2. Atomic coordinates ( x 10<sup>4</sup>) and equivalent isotropic displacement parameters (Å<sup>2</sup> x 10<sup>3</sup>) for C<sub>21</sub>H<sub>26</sub>NOP (S12). U(eq) is defined as one third of the trace of the orthogonalized U<sup>ij</sup> tensor.**

|       | x         | y        | z        | U(eq) |
|-------|-----------|----------|----------|-------|
| P(1)  | 520(1)    | -860(1)  | 8324(1)  | 13(1) |
| O(1)  | -1929(1)  | -1644(1) | 8175(1)  | 17(1) |
| N(1)  | 2774(2)   | -1603(1) | 7910(1)  | 16(1) |
| C(1)  | 5612(4)   | -3552(4) | 5942(1)  | 62(1) |
| C(2)  | 3843(3)   | -3594(2) | 6350(1)  | 36(1) |
| C(3)  | 4157(2)   | -3166(2) | 7029(1)  | 25(1) |
| C(4)  | 2418(2)   | -1834(1) | 7224(1)  | 17(1) |
| C(5)  | 2527(10)  | -366(5)  | 6853(2)  | 25(1) |
| C(6)  | 698(7)    | 310(4)   | 6539(1)  | 29(1) |
| C(7)  | 855(8)    | 1837(4)  | 6190(2)  | 40(1) |
| C(8)  | -89(8)    | 1743(5)  | 5514(2)  | 46(1) |
| C(9)  | 17(11)    | 3306(5)  | 5178(2)  | 63(1) |
| C(5X) | 3096(9)   | -323(6)  | 6874(3)  | 20(1) |
| C(6X) | 1493(8)   | 673(5)   | 6602(2)  | 36(1) |
| C(7X) | 2153(8)   | 2236(5)  | 6320(2)  | 46(1) |
| C(8X) | 1431(9)   | 2386(6)  | 5634(2)  | 60(1) |
| C(9X) | -1310(11) | 2407(8)  | 5500(3)  | 80(2) |
| C(10) | 1615(2)   | -1035(1) | 9129(1)  | 15(1) |
| C(11) | 3681(2)   | -1934(1) | 9332(1)  | 19(1) |
| C(12) | 4308(2)   | -2036(2) | 9972(1)  | 22(1) |
| C(13) | 2892(2)   | -1251(1) | 10408(1) | 22(1) |
| C(14) | 841(2)    | -353(2)  | 10210(1) | 23(1) |
| C(15) | 211(2)    | -247(2)  | 9573(1)  | 20(1) |
| C(16) | 159(2)    | 1236(1)  | 8196(1)  | 15(1) |
| C(17) | 1976(2)   | 2315(1)  | 8408(1)  | 19(1) |
| C(18) | 1664(2)   | 3917(1)  | 8290(1)  | 23(1) |
| C(19) | -454(3)   | 4460(1)  | 7960(1)  | 25(1) |
| C(20) | -2246(2)  | 3391(2)  | 7741(1)  | 26(1) |
| C(21) | -1952(2)  | 1790(2)  | 7864(1)  | 21(1) |

**Table 3. Bond lengths [Å] and angles [°] for C<sub>21</sub>H<sub>26</sub>NOP (S12)**

---

|             |            |
|-------------|------------|
| P(1)-O(1)   | 1.4931(8)  |
| P(1)-N(1)   | 1.6428(9)  |
| P(1)-C(10)  | 1.7978(11) |
| P(1)-C(16)  | 1.8083(12) |
| N(1)-C(4)   | 1.4767(14) |
| N(1)-H(1N)  | 0.885(13)  |
| C(1)-C(2)   | 1.307(3)   |
| C(1)-H(1A)  | 0.993(17)  |
| C(1)-H(1B)  | 0.986(16)  |
| C(2)-C(3)   | 1.4923(19) |
| C(2)-H(2)   | 0.980(15)  |
| C(3)-C(4)   | 1.5302(16) |
| C(3)-H(3A)  | 0.9900     |
| C(3)-H(3B)  | 0.9900     |
| C(4)-C(5)   | 1.477(5)   |
| C(4)-H(4)   | 0.989(12)  |
| C(5)-C(6)   | 1.298(5)   |
| C(5)-H(5)   | 0.9500     |
| C(6)-C(7)   | 1.497(5)   |
| C(6)-H(6)   | 0.9500     |
| C(7)-C(8)   | 1.509(5)   |
| C(7)-H(7A)  | 0.9900     |
| C(7)-H(7B)  | 0.9900     |
| C(8)-C(9)   | 1.509(5)   |
| C(8)-H(8A)  | 0.9900     |
| C(8)-H(8B)  | 0.9900     |
| C(9)-H(9A)  | 0.9800     |
| C(9)-H(9B)  | 0.9800     |
| C(9)-H(9C)  | 0.9800     |
| C(10)-C(15) | 1.3976(15) |
| C(10)-C(11) | 1.3991(15) |
| C(11)-C(12) | 1.3924(17) |
| C(11)-H(11) | 0.9500     |
| C(12)-C(13) | 1.3886(17) |

|             |            |
|-------------|------------|
| C(12)-H(12) | 0.9500     |
| C(13)-C(14) | 1.3889(17) |
| C(13)-H(13) | 0.9500     |
| C(14)-C(15) | 1.3867(17) |
| C(14)-H(14) | 0.9500     |
| C(15)-H(15) | 0.9500     |
| C(16)-C(21) | 1.3922(15) |
| C(16)-C(17) | 1.3979(16) |
| C(17)-C(18) | 1.3900(17) |
| C(17)-H(17) | 0.9500     |
| C(18)-C(19) | 1.3914(18) |
| C(18)-H(18) | 0.9500     |
| C(19)-C(20) | 1.388(2)   |
| C(19)-H(19) | 0.9500     |
| C(20)-C(21) | 1.3902(18) |
| C(20)-H(20) | 0.9500     |
| C(21)-H(21) | 0.9500     |

|                  |            |
|------------------|------------|
| O(1)-P(1)-N(1)   | 111.71(5)  |
| O(1)-P(1)-C(10)  | 114.84(5)  |
| N(1)-P(1)-C(10)  | 105.01(5)  |
| O(1)-P(1)-C(16)  | 108.53(5)  |
| N(1)-P(1)-C(16)  | 111.89(5)  |
| C(10)-P(1)-C(16) | 104.70(5)  |
| C(4)-N(1)-P(1)   | 120.56(7)  |
| C(4)-N(1)-H(1N)  | 115.7(10)  |
| P(1)-N(1)-H(1N)  | 118.5(10)  |
| C(2)-C(1)-H(1A)  | 119.6(17)  |
| C(2)-C(1)-H(1B)  | 122.8(16)  |
| H(1A)-C(1)-H(1B) | 118(2)     |
| C(1)-C(2)-C(3)   | 125.23(16) |
| C(1)-C(2)-H(2)   | 117.9(12)  |
| C(3)-C(2)-H(2)   | 116.9(12)  |
| C(2)-C(3)-C(4)   | 113.21(11) |
| C(2)-C(3)-H(3A)  | 108.9      |
| C(4)-C(3)-H(3A)  | 108.9      |

|                   |            |
|-------------------|------------|
| C(2)-C(3)-H(3B)   | 108.9      |
| C(4)-C(3)-H(3B)   | 108.9      |
| H(3A)-C(3)-H(3B)  | 107.7      |
| C(5)-C(4)-N(1)    | 114.2(2)   |
| C(5)-C(4)-C(3)    | 116.2(2)   |
| N(1)-C(4)-C(3)    | 107.93(9)  |
| C(5)-C(4)-H(4)    | 99.3(10)   |
| N(1)-C(4)-H(4)    | 107.5(9)   |
| C(3)-C(4)-H(4)    | 111.2(10)  |
| C(6)-C(5)-C(4)    | 127.2(4)   |
| C(6)-C(5)-H(5)    | 116.4      |
| C(4)-C(5)-H(5)    | 116.4      |
| C(5)-C(6)-C(7)    | 125.7(4)   |
| C(5)-C(6)-H(6)    | 117.2      |
| C(7)-C(6)-H(6)    | 117.2      |
| C(6)-C(7)-C(8)    | 113.9(3)   |
| C(6)-C(7)-H(7A)   | 108.8      |
| C(8)-C(7)-H(7A)   | 108.8      |
| C(6)-C(7)-H(7B)   | 108.8      |
| C(8)-C(7)-H(7B)   | 108.8      |
| H(7A)-C(7)-H(7B)  | 107.7      |
| C(7)-C(8)-C(9)    | 112.9(3)   |
| C(7)-C(8)-H(8A)   | 109.0      |
| C(9)-C(8)-H(8A)   | 109.0      |
| C(7)-C(8)-H(8B)   | 109.0      |
| C(9)-C(8)-H(8B)   | 109.0      |
| H(8A)-C(8)-H(8B)  | 107.8      |
| C(8)-C(9)-H(9A)   | 109.5      |
| C(8)-C(9)-H(9B)   | 109.5      |
| H(9A)-C(9)-H(9B)  | 109.5      |
| C(8)-C(9)-H(9C)   | 109.5      |
| H(9A)-C(9)-H(9C)  | 109.5      |
| H(9B)-C(9)-H(9C)  | 109.5      |
| C(15)-C(10)-C(11) | 119.24(10) |
| C(15)-C(10)-P(1)  | 116.15(8)  |
| C(11)-C(10)-P(1)  | 124.57(8)  |

|                   |            |
|-------------------|------------|
| C(12)-C(11)-C(10) | 119.79(11) |
| C(12)-C(11)-H(11) | 120.1      |
| C(10)-C(11)-H(11) | 120.1      |
| C(13)-C(12)-C(11) | 120.37(11) |
| C(13)-C(12)-H(12) | 119.8      |
| C(11)-C(12)-H(12) | 119.8      |
| C(12)-C(13)-C(14) | 120.16(11) |
| C(12)-C(13)-H(13) | 119.9      |
| C(14)-C(13)-H(13) | 119.9      |
| C(15)-C(14)-C(13) | 119.70(11) |
| C(15)-C(14)-H(14) | 120.2      |
| C(13)-C(14)-H(14) | 120.2      |
| C(14)-C(15)-C(10) | 120.75(11) |
| C(14)-C(15)-H(15) | 119.6      |
| C(10)-C(15)-H(15) | 119.6      |
| C(21)-C(16)-C(17) | 119.01(11) |
| C(21)-C(16)-P(1)  | 119.24(9)  |
| C(17)-C(16)-P(1)  | 121.73(9)  |
| C(18)-C(17)-C(16) | 120.27(11) |
| C(18)-C(17)-H(17) | 119.9      |
| C(16)-C(17)-H(17) | 119.9      |
| C(17)-C(18)-C(19) | 120.32(11) |
| C(17)-C(18)-H(18) | 119.8      |
| C(19)-C(18)-H(18) | 119.8      |
| C(20)-C(19)-C(18) | 119.57(11) |
| C(20)-C(19)-H(19) | 120.2      |
| C(18)-C(19)-H(19) | 120.2      |
| C(19)-C(20)-C(21) | 120.21(12) |
| C(19)-C(20)-H(20) | 119.9      |
| C(21)-C(20)-H(20) | 119.9      |
| C(20)-C(21)-C(16) | 120.60(12) |
| C(20)-C(21)-H(21) | 119.7      |
| C(16)-C(21)-H(21) | 119.7      |

---

Symmetry transformations used to generate equivalent atoms:

**Table 4. Anisotropic displacement parameters ( $\text{\AA}^2 \times 10^3$ ) for  $\text{C}_{21}\text{H}_{26}\text{NOP}$  (S12). The anisotropic displacement factor exponent takes the form:  $-2p^2 [ h^2 a^{*2} U_{11} + \dots + 2 h k a^* b^* U_{12} ]$**

|       | U11    | U22   | U33   | U23    | U13   | U12   |
|-------|--------|-------|-------|--------|-------|-------|
| P(1)  | 9(1)   | 12(1) | 18(1) | 0(1)   | 0(1)  | 0(1)  |
| O(1)  | 10(1)  | 16(1) | 26(1) | -3(1)  | -1(1) | -1(1) |
| N(1)  | 11(1)  | 18(1) | 18(1) | -2(1)  | 0(1)  | 2(1)  |
| C(1)  | 57(1)  | 95(2) | 33(1) | -19(1) | 9(1)  | 12(1) |
| C(2)  | 36(1)  | 40(1) | 31(1) | -15(1) | 0(1)  | 8(1)  |
| C(3)  | 26(1)  | 26(1) | 24(1) | -2(1)  | 3(1)  | 9(1)  |
| C(4)  | 14(1)  | 18(1) | 18(1) | -1(1)  | 0(1)  | 2(1)  |
| C(5)  | 24(2)  | 27(2) | 26(2) | 3(1)   | 2(2)  | -1(2) |
| C(6)  | 30(2)  | 31(2) | 24(1) | 10(1)  | 2(1)  | 8(2)  |
| C(7)  | 55(2)  | 34(2) | 30(1) | 9(1)   | -1(1) | 15(2) |
| C(8)  | 54(2)  | 53(2) | 32(2) | 9(2)   | 2(1)  | 20(2) |
| C(9)  | 116(4) | 41(2) | 31(2) | 9(2)   | -6(2) | 15(2) |
| C(10) | 13(1)  | 12(1) | 18(1) | 2(1)   | 1(1)  | -1(1) |
| C(11) | 15(1)  | 19(1) | 22(1) | 1(1)   | 2(1)  | 3(1)  |
| C(12) | 18(1)  | 26(1) | 24(1) | 5(1)   | -1(1) | 3(1)  |
| C(13) | 23(1)  | 24(1) | 19(1) | 5(1)   | 0(1)  | -1(1) |
| C(14) | 25(1)  | 23(1) | 20(1) | 1(1)   | 6(1)  | 4(1)  |
| C(15) | 18(1)  | 20(1) | 22(1) | 2(1)   | 3(1)  | 4(1)  |
| C(16) | 15(1)  | 13(1) | 17(1) | 1(1)   | 2(1)  | 2(1)  |
| C(17) | 18(1)  | 17(1) | 21(1) | 1(1)   | 0(1)  | -1(1) |
| C(18) | 28(1)  | 14(1) | 26(1) | 0(1)   | 4(1)  | -3(1) |
| C(19) | 30(1)  | 15(1) | 30(1) | 4(1)   | 9(1)  | 4(1)  |
| C(20) | 22(1)  | 22(1) | 33(1) | 7(1)   | 1(1)  | 7(1)  |
| C(21) | 16(1)  | 20(1) | 28(1) | 1(1)   | -2(1) | 2(1)  |

**Table 5. Hydrogen coordinates ( $\times 10^4$ ) and isotropic displacement parameters ( $\text{\AA}^2 \times 10^3$ )**

for C<sub>21</sub>H<sub>26</sub>NOP (S12)

|        | x        | y         | z        | U(eq) |
|--------|----------|-----------|----------|-------|
| H(1N)  | 4340(20) | -1474(19) | 8048(7)  | 19    |
| H(1A)  | 7340(40) | -3260(30) | 6082(13) | 74    |
| H(1B)  | 5330(50) | -3860(30) | 5497(8)  | 74    |
| H(2)   | 2180(30) | -3950(20) | 6204(10) | 43    |
| H(3A)  | 5913     | -2841     | 7116     | 30    |
| H(3B)  | 3830     | -4109     | 7287     | 30    |
| H(4)   | 640(20)  | -2114(19) | 7140(7)  | 20    |
| H(5)   | 4110     | 140       | 6843     | 31    |
| H(6)   | -877     | -210      | 6531     | 34    |
| H(7A)  | 2620     | 2190      | 6199     | 48    |
| H(7B)  | -128     | 2642      | 6410     | 48    |
| H(8A)  | -1840    | 1362      | 5503     | 56    |
| H(8B)  | 928      | 965       | 5289     | 56    |
| H(9A)  | -656     | 3184      | 4746     | 94    |
| H(9B)  | 1757     | 3666      | 5169     | 94    |
| H(9C)  | -983     | 4084      | 5399     | 94    |
| H(5X)  | 4825     | -80       | 6850     | 24    |
| H(6X)  | -220     | 375       | 6584     | 43    |
| H(7XA) | 1313     | 3082      | 6554     | 55    |
| H(7XB) | 3981     | 2399      | 6374     | 55    |
| H(8XA) | 2162     | 3370      | 5471     | 72    |
| H(8XB) | 2167     | 1493      | 5404     | 72    |
| H(9XA) | -1640    | 2485      | 5045     | 120   |
| H(9XB) | -2048    | 3317      | 5709     | 120   |
| H(9XC) | -2053    | 1434      | 5658     | 120   |
| H(11)  | 4654     | -2474     | 9035     | 23    |
| H(12)  | 5711     | -2647     | 10110    | 27    |
| H(13)  | 3327     | -1328     | 10844    | 27    |
| H(14)  | -125     | 186       | 10508    | 27    |
| H(15)  | -1191    | 368       | 9438     | 24    |
| H(17)  | 3429     | 1952      | 8633     | 23    |



|       |       |      |      |    |
|-------|-------|------|------|----|
| H(18) | 2904  | 4644 | 8437 | 27 |
| H(19) | -672  | 5556 | 7883 | 30 |
| H(20) | -3677 | 3753 | 7507 | 31 |
| H(21) | -3204 | 1068 | 7721 | 26 |

---

**Table 6. Torsion angles [°] for C<sub>21</sub>H<sub>26</sub>NOP (S12)**

---

|                         |             |
|-------------------------|-------------|
| O(1)-P(1)-N(1)-C(4)     | 47.67(10)   |
| C(10)-P(1)-N(1)-C(4)    | 172.76(9)   |
| C(16)-P(1)-N(1)-C(4)    | -74.24(10)  |
| C(1)-C(2)-C(3)-C(4)     | 121.7(2)    |
| P(1)-N(1)-C(4)-C(5)     | 75.1(2)     |
| P(1)-N(1)-C(4)-C(3)     | -154.04(9)  |
| C(2)-C(3)-C(4)-C(5)     | -54.4(3)    |
| C(2)-C(3)-C(4)-N(1)     | 175.89(12)  |
| N(1)-C(4)-C(5)-C(6)     | -111.9(5)   |
| C(3)-C(4)-C(5)-C(6)     | 121.5(5)    |
| C(4)-C(5)-C(6)-C(7)     | 177.3(4)    |
| C(5)-C(6)-C(7)-C(8)     | 127.5(5)    |
| C(6)-C(7)-C(8)-C(9)     | 178.3(4)    |
| O(1)-P(1)-C(10)-C(15)   | -67.14(10)  |
| N(1)-P(1)-C(10)-C(15)   | 169.76(9)   |
| C(16)-P(1)-C(10)-C(15)  | 51.77(10)   |
| O(1)-P(1)-C(10)-C(11)   | 110.54(10)  |
| N(1)-P(1)-C(10)-C(11)   | -12.56(11)  |
| C(16)-P(1)-C(10)-C(11)  | -130.55(10) |
| C(15)-C(10)-C(11)-C(12) | 0.16(17)    |
| P(1)-C(10)-C(11)-C(12)  | -177.45(9)  |
| C(10)-C(11)-C(12)-C(13) | 0.03(18)    |
| C(11)-C(12)-C(13)-C(14) | -0.18(19)   |
| C(12)-C(13)-C(14)-C(15) | 0.13(19)    |
| C(13)-C(14)-C(15)-C(10) | 0.06(19)    |
| C(11)-C(10)-C(15)-C(14) | -0.20(18)   |
| P(1)-C(10)-C(15)-C(14)  | 177.61(10)  |

|                         |             |
|-------------------------|-------------|
| O(1)-P(1)-C(16)-C(21)   | -14.04(11)  |
| N(1)-P(1)-C(16)-C(21)   | 109.67(10)  |
| C(10)-P(1)-C(16)-C(21)  | -137.13(9)  |
| O(1)-P(1)-C(16)-C(17)   | 167.59(9)   |
| N(1)-P(1)-C(16)-C(17)   | -68.70(10)  |
| C(10)-P(1)-C(16)-C(17)  | 44.50(10)   |
| C(21)-C(16)-C(17)-C(18) | 0.30(18)    |
| P(1)-C(16)-C(17)-C(18)  | 178.68(9)   |
| C(16)-C(17)-C(18)-C(19) | -0.20(19)   |
| C(17)-C(18)-C(19)-C(20) | -0.64(19)   |
| C(18)-C(19)-C(20)-C(21) | 1.37(19)    |
| C(19)-C(20)-C(21)-C(16) | -1.3(2)     |
| C(17)-C(16)-C(21)-C(20) | 0.43(18)    |
| P(1)-C(16)-C(21)-C(20)  | -177.98(10) |

---

Symmetry transformations used to generate equivalent atoms:

**Table 7. Hydrogen bonds for C<sub>21</sub>H<sub>26</sub>NOP (S12) [Å and °]**

| D-H...A             | d(D-H)    | d(H...A)  | d(D...A)   | <(DHA)    |
|---------------------|-----------|-----------|------------|-----------|
| N(1)-H(1N)...O(1)#1 | 0.885(13) | 2.009(13) | 2.8692(12) | 163.7(14) |

---

Symmetry transformations used to generate equivalent atoms:

#1 x+1,y,z

**X-ray Crystal Structure of 10 (Figure 3a)**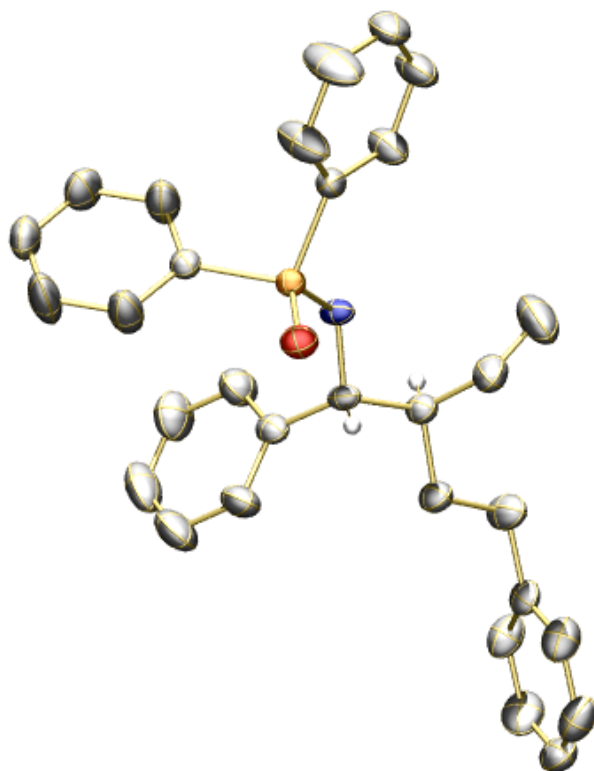**Table 1. Crystal data and structure refinement for C<sub>30</sub>H<sub>30</sub>NOP (10)**

|                        |                                     |         |
|------------------------|-------------------------------------|---------|
| Identification code    | C <sub>30</sub> H <sub>30</sub> NOP |         |
| Empirical formula      | C <sub>30</sub> H <sub>30</sub> NOP |         |
| Formula weight         | 451.52                              |         |
| Temperature            | 213(2) K                            |         |
| Wavelength             | 0.71073 Å                           |         |
| Crystal system         | Orthorhombic                        |         |
| Space group            | P2(1)2(1)2(1)                       |         |
| Unit cell dimensions   | a = 5.4229(2) Å                     | α = 90° |
|                        | b = 16.7050(6) Å                    | β = 90° |
|                        | c = 27.7408(11) Å                   | γ = 90° |
| Volume                 | 2513.03(16) Å <sup>3</sup>          |         |
| Z                      | 4                                   |         |
| Density (calculated)   | 1.193 Mg/m <sup>3</sup>             |         |
| Absorption coefficient | 0.131 mm <sup>-1</sup>              |         |
| F(000)                 | 960                                 |         |

|                                   |                                             |
|-----------------------------------|---------------------------------------------|
| Crystal size                      | 0.20 x 0.08 x 0.04 mm <sup>3</sup>          |
| Theta range for data collection   | 1.42 to 28.37°                              |
| Index ranges                      | -6<=h<=7, -22<=k<=22, -37<=l<=37            |
| Reflections collected             | 65893                                       |
| Independent reflections           | 6293 [R(int) = 0.0763]                      |
| Completeness to theta = 28.37°    | 99.9 %                                      |
| Absorption correction             | Semi-empirical from equivalents             |
| Max. and min. transmission        | 0.9948 and 0.9742                           |
| Refinement method                 | Full-matrix least-squares on F <sup>2</sup> |
| Data / restraints / parameters    | 6293 / 0 / 313                              |
| Goodness-of-fit on F <sup>2</sup> | 1.016                                       |
| Final R indices [I>2sigma(I)]     | R1 = 0.0422, wR2 = 0.0906                   |
| R indices (all data)              | R1 = 0.0607, wR2 = 0.0990                   |
| Absolute structure parameter      | 0.01(8)                                     |
| Extinction coefficient            | na                                          |
| Largest diff. peak and hole       | 0.227 and -0.202 e.Å <sup>-3</sup>          |

**Table 2. Atomic coordinates ( x 10<sup>4</sup>) and equivalent isotropic displacement parameters (Å<sup>2</sup> x 10<sup>3</sup>) for C<sub>30</sub>H<sub>30</sub>NOP (10). U(eq) is defined as one third of the trace of the orthogonalized U<sub>ij</sub> tensor.**

|      | x        | y       | z       | U(eq) |
|------|----------|---------|---------|-------|
| P(1) | 10237(1) | 1920(1) | 1447(1) | 25(1) |
| O(1) | 12782(2) | 1714(1) | 1299(1) | 34(1) |
| N(1) | 8159(3)  | 1429(1) | 1140(1) | 28(1) |
| C(1) | 9453(3)  | 2960(1) | 1370(1) | 29(1) |
| C(2) | 7484(4)  | 3226(1) | 1103(1) | 47(1) |
| C(3) | 7029(5)  | 4042(1) | 1060(1) | 54(1) |
| C(4) | 8565(5)  | 4584(1) | 1272(1) | 51(1) |
| C(5) | 10554(6) | 4327(1) | 1528(1) | 81(1) |
| C(6) | 10993(5) | 3517(1) | 1580(1) | 64(1) |
| C(7) | 9832(3)  | 1752(1) | 2088(1) | 28(1) |
| C(8) | 7816(4)  | 2046(2) | 2329(1) | 56(1) |

|       |          |          |         |       |
|-------|----------|----------|---------|-------|
| C(9)  | 7515(5)  | 1903(2)  | 2818(1) | 55(1) |
| C(10) | 9196(5)  | 1470(1)  | 3065(1) | 48(1) |
| C(11) | 11243(6) | 1201(2)  | 2836(1) | 75(1) |
| C(12) | 11557(5) | 1340(2)  | 2344(1) | 58(1) |
| C(13) | 8636(4)  | 611(1)   | 964(1)  | 29(1) |
| C(14) | 8128(4)  | -26(1)   | 1339(1) | 34(1) |
| C(15) | 6030(5)  | -6(1)    | 1619(1) | 49(1) |
| C(16) | 5611(6)  | -590(2)  | 1964(1) | 64(1) |
| C(17) | 7274(7)  | -1203(2) | 2026(1) | 69(1) |
| C(18) | 9355(6)  | -1231(2) | 1748(1) | 67(1) |
| C(19) | 9771(5)  | -646(1)  | 1408(1) | 50(1) |
| C(20) | 7174(4)  | 486(1)   | 490(1)  | 33(1) |
| C(21) | 7710(5)  | 1155(1)  | 147(1)  | 49(1) |
| C(22) | 6103(8)  | 1636(2)  | -48(1)  | 79(1) |
| C(23) | 7847(4)  | -325(1)  | 262(1)  | 38(1) |
| C(24) | 6369(5)  | -520(1)  | -191(1) | 51(1) |
| C(25) | 7255(4)  | -1271(1) | -441(1) | 37(1) |
| C(26) | 5986(4)  | -1981(1) | -406(1) | 48(1) |
| C(27) | 6824(5)  | -2660(1) | -638(1) | 58(1) |
| C(28) | 8930(5)  | -2649(1) | -903(1) | 53(1) |
| C(29) | 10220(4) | -1956(2) | -938(1) | 54(1) |
| C(30) | 9382(4)  | -1268(1) | -711(1) | 49(1) |

---

**Table 3. Bond lengths [Å] and angles [°] for C<sub>30</sub>H<sub>30</sub>NOP (10)**

|            |            |
|------------|------------|
| P(1)-O(1)  | 1.4815(13) |
| P(1)-N(1)  | 1.6343(16) |
| P(1)-C(1)  | 1.8003(17) |
| P(1)-C(7)  | 1.8131(17) |
| N(1)-C(13) | 1.473(2)   |
| N(1)-H(1N) | 0.78(2)    |
| C(1)-C(2)  | 1.373(3)   |
| C(1)-C(6)  | 1.380(3)   |
| C(2)-C(3)  | 1.391(3)   |

|             |          |
|-------------|----------|
| C(2)-H(2)   | 0.9400   |
| C(3)-C(4)   | 1.363(3) |
| C(3)-H(3)   | 0.9400   |
| C(4)-C(5)   | 1.361(4) |
| C(4)-H(4)   | 0.9400   |
| C(5)-C(6)   | 1.381(3) |
| C(5)-H(5)   | 0.9400   |
| C(6)-H(6)   | 0.9400   |
| C(7)-C(12)  | 1.361(3) |
| C(7)-C(8)   | 1.371(3) |
| C(8)-C(9)   | 1.388(3) |
| C(8)-H(8)   | 0.9400   |
| C(9)-C(10)  | 1.349(3) |
| C(9)-H(9)   | 0.9400   |
| C(10)-C(11) | 1.355(3) |
| C(10)-H(10) | 0.9400   |
| C(11)-C(12) | 1.396(3) |
| C(11)-H(11) | 0.9400   |
| C(12)-H(12) | 0.9400   |
| C(13)-C(14) | 1.514(3) |
| C(13)-C(20) | 1.549(3) |
| C(13)-H(13) | 0.97(2)  |
| C(14)-C(15) | 1.378(3) |
| C(14)-C(19) | 1.380(3) |
| C(15)-C(16) | 1.384(3) |
| C(15)-H(15) | 0.9400   |
| C(16)-C(17) | 1.377(4) |
| C(16)-H(16) | 0.9400   |
| C(17)-C(18) | 1.368(4) |
| C(17)-H(17) | 0.9400   |
| C(18)-C(19) | 1.377(3) |
| C(18)-H(18) | 0.9400   |
| C(19)-H(19) | 0.9400   |
| C(20)-C(21) | 1.498(3) |
| C(20)-C(23) | 1.539(3) |
| C(20)-H(20) | 0.98(2)  |

|                  |            |
|------------------|------------|
| C(21)-C(22)      | 1.301(4)   |
| C(21)-H(21)      | 0.9400     |
| C(22)-H(22A)     | 1.01(3)    |
| C(22)-H(22B)     | 0.93(3)    |
| C(23)-C(24)      | 1.527(3)   |
| C(23)-H(23)      | 0.9800     |
| C(23)-H(7B)      | 0.9800     |
| C(24)-C(25)      | 1.512(3)   |
| C(24)-H(24A)     | 0.9800     |
| C(24)-H(24B)     | 0.9800     |
| C(25)-C(30)      | 1.374(3)   |
| C(25)-C(26)      | 1.375(3)   |
| C(26)-C(27)      | 1.381(3)   |
| C(26)-H(26)      | 0.9400     |
| C(27)-C(28)      | 1.359(4)   |
| C(27)-H(27)      | 0.9400     |
| C(28)-C(29)      | 1.357(3)   |
| C(28)-H(28)      | 0.9400     |
| C(29)-C(30)      | 1.387(3)   |
| C(29)-H(29)      | 0.9400     |
| C(30)-H(30)      | 0.9400     |
| O(1)-P(1)-N(1)   | 112.31(8)  |
| O(1)-P(1)-C(1)   | 114.32(8)  |
| N(1)-P(1)-C(1)   | 105.06(8)  |
| O(1)-P(1)-C(7)   | 110.45(8)  |
| N(1)-P(1)-C(7)   | 110.49(8)  |
| C(1)-P(1)-C(7)   | 103.78(7)  |
| C(13)-N(1)-P(1)  | 121.21(13) |
| C(13)-N(1)-H(1N) | 115.8(16)  |
| P(1)-N(1)-H(1N)  | 117.8(16)  |
| C(2)-C(1)-C(6)   | 118.66(18) |
| C(2)-C(1)-P(1)   | 124.10(14) |
| C(6)-C(1)-P(1)   | 117.20(15) |
| C(1)-C(2)-C(3)   | 120.1(2)   |
| C(1)-C(2)-H(2)   | 119.9      |
| C(3)-C(2)-H(2)   | 119.9      |

|                   |            |
|-------------------|------------|
| C(4)-C(3)-C(2)    | 120.3(2)   |
| C(4)-C(3)-H(3)    | 119.8      |
| C(2)-C(3)-H(3)    | 119.8      |
| C(5)-C(4)-C(3)    | 120.0(2)   |
| C(5)-C(4)-H(4)    | 120.0      |
| C(3)-C(4)-H(4)    | 120.0      |
| C(4)-C(5)-C(6)    | 120.0(2)   |
| C(4)-C(5)-H(5)    | 120.0      |
| C(6)-C(5)-H(5)    | 120.0      |
| C(1)-C(6)-C(5)    | 120.8(2)   |
| C(1)-C(6)-H(6)    | 119.6      |
| C(5)-C(6)-H(6)    | 119.6      |
| C(12)-C(7)-C(8)   | 118.34(18) |
| C(12)-C(7)-P(1)   | 120.43(15) |
| C(8)-C(7)-P(1)    | 121.22(14) |
| C(7)-C(8)-C(9)    | 120.6(2)   |
| C(7)-C(8)-H(8)    | 119.7      |
| C(9)-C(8)-H(8)    | 119.7      |
| C(10)-C(9)-C(8)   | 120.6(2)   |
| C(10)-C(9)-H(9)   | 119.7      |
| C(8)-C(9)-H(9)    | 119.7      |
| C(9)-C(10)-C(11)  | 119.6(2)   |
| C(9)-C(10)-H(10)  | 120.2      |
| C(11)-C(10)-H(10) | 120.2      |
| C(10)-C(11)-C(12) | 120.1(2)   |
| C(10)-C(11)-H(11) | 119.9      |
| C(12)-C(11)-H(11) | 119.9      |
| C(7)-C(12)-C(11)  | 120.7(2)   |
| C(7)-C(12)-H(12)  | 119.6      |
| C(11)-C(12)-H(12) | 119.6      |
| N(1)-C(13)-C(14)  | 113.10(15) |
| N(1)-C(13)-C(20)  | 108.47(15) |
| C(14)-C(13)-C(20) | 113.26(15) |
| N(1)-C(13)-H(13)  | 105.7(12)  |
| C(14)-C(13)-H(13) | 110.4(12)  |
| C(20)-C(13)-H(13) | 105.4(11)  |



|                     |            |
|---------------------|------------|
| C(15)-C(14)-C(19)   | 118.22(19) |
| C(15)-C(14)-C(13)   | 121.40(17) |
| C(19)-C(14)-C(13)   | 120.37(19) |
| C(14)-C(15)-C(16)   | 120.6(2)   |
| C(14)-C(15)-H(15)   | 119.7      |
| C(16)-C(15)-H(15)   | 119.7      |
| C(17)-C(16)-C(15)   | 120.2(3)   |
| C(17)-C(16)-H(16)   | 119.9      |
| C(15)-C(16)-H(16)   | 119.9      |
| C(18)-C(17)-C(16)   | 119.7(2)   |
| C(18)-C(17)-H(17)   | 120.2      |
| C(16)-C(17)-H(17)   | 120.2      |
| C(17)-C(18)-C(19)   | 119.8(2)   |
| C(17)-C(18)-H(18)   | 120.1      |
| C(19)-C(18)-H(18)   | 120.1      |
| C(18)-C(19)-C(14)   | 121.5(2)   |
| C(18)-C(19)-H(19)   | 119.3      |
| C(14)-C(19)-H(19)   | 119.3      |
| C(21)-C(20)-C(23)   | 110.45(16) |
| C(21)-C(20)-C(13)   | 109.87(16) |
| C(23)-C(20)-C(13)   | 110.28(15) |
| C(21)-C(20)-H(20)   | 107.7(12)  |
| C(23)-C(20)-H(20)   | 109.2(12)  |
| C(13)-C(20)-H(20)   | 109.3(12)  |
| C(22)-C(21)-C(20)   | 126.4(3)   |
| C(22)-C(21)-H(21)   | 116.8      |
| C(20)-C(21)-H(21)   | 116.8      |
| C(21)-C(22)-H(22A)  | 115.1(19)  |
| C(21)-C(22)-H(22B)  | 118(2)     |
| H(22A)-C(22)-H(22B) | 126(3)     |
| C(24)-C(23)-C(20)   | 113.68(17) |
| C(24)-C(23)-H(23)   | 108.8      |
| C(20)-C(23)-H(23)   | 108.8      |
| C(24)-C(23)-H(7B)   | 108.8      |
| C(20)-C(23)-H(7B)   | 108.8      |
| H(23)-C(23)-H(7B)   | 107.7      |

|                     |            |
|---------------------|------------|
| C(25)-C(24)-C(23)   | 112.82(18) |
| C(25)-C(24)-H(24A)  | 109.0      |
| C(23)-C(24)-H(24A)  | 109.0      |
| C(25)-C(24)-H(24B)  | 109.0      |
| C(23)-C(24)-H(24B)  | 109.0      |
| H(24A)-C(24)-H(24B) | 107.8      |
| C(30)-C(25)-C(26)   | 117.51(19) |
| C(30)-C(25)-C(24)   | 120.9(2)   |
| C(26)-C(25)-C(24)   | 121.6(2)   |
| C(25)-C(26)-C(27)   | 120.7(2)   |
| C(25)-C(26)-H(26)   | 119.6      |
| C(27)-C(26)-H(26)   | 119.6      |
| C(28)-C(27)-C(26)   | 121.2(2)   |
| C(28)-C(27)-H(27)   | 119.4      |
| C(26)-C(27)-H(27)   | 119.4      |
| C(29)-C(28)-C(27)   | 118.9(2)   |
| C(29)-C(28)-H(28)   | 120.5      |
| C(27)-C(28)-H(28)   | 120.5      |
| C(28)-C(29)-C(30)   | 120.4(2)   |
| C(28)-C(29)-H(29)   | 119.8      |
| C(30)-C(29)-H(29)   | 119.8      |
| C(25)-C(30)-C(29)   | 121.3(2)   |
| C(25)-C(30)-H(30)   | 119.3      |
| C(29)-C(30)-H(30)   | 119.3      |

---

Symmetry transformations used to generate equivalent atoms:

**Table 4. Anisotropic displacement parameters ( $\text{\AA}^2 \times 10^3$ ) for  $\text{C}_{30}\text{H}_{30}\text{NOP}$  (10). The anisotropic displacement factor exponent takes the form:  $-2p^2 [ h^2 a^{*2} U_{11} + \dots + 2 h k a^* b^* U_{12} ]$**

|      | U11   | U22   | U33   | U23   | U13   | U12  |
|------|-------|-------|-------|-------|-------|------|
| P(1) | 23(1) | 25(1) | 27(1) | -1(1) | -1(1) | 2(1) |

|       |        |        |        |        |        |        |
|-------|--------|--------|--------|--------|--------|--------|
| O(1)  | 26(1)  | 38(1)  | 40(1)  | -2(1)  | 2(1)   | 3(1)   |
| N(1)  | 23(1)  | 26(1)  | 36(1)  | -8(1)  | -4(1)  | 5(1)   |
| C(1)  | 33(1)  | 28(1)  | 27(1)  | 0(1)   | 1(1)   | 2(1)   |
| C(2)  | 53(1)  | 33(1)  | 56(1)  | 1(1)   | -21(1) | 2(1)   |
| C(3)  | 66(2)  | 34(1)  | 63(2)  | 3(1)   | -21(1) | 11(1)  |
| C(4)  | 73(2)  | 28(1)  | 53(1)  | 1(1)   | -9(1)  | 6(1)   |
| C(5)  | 99(2)  | 30(1)  | 114(2) | -7(1)  | -49(2) | -5(1)  |
| C(6)  | 64(2)  | 36(1)  | 90(2)  | -1(1)  | -40(1) | 1(1)   |
| C(7)  | 30(1)  | 26(1)  | 29(1)  | -2(1)  | -3(1)  | -1(1)  |
| C(8)  | 49(1)  | 80(2)  | 37(1)  | 11(1)  | 6(1)   | 27(1)  |
| C(9)  | 55(1)  | 70(2)  | 39(1)  | 4(1)   | 16(1)  | 16(1)  |
| C(10) | 63(2)  | 54(1)  | 29(1)  | 8(1)   | 2(1)   | -2(1)  |
| C(11) | 76(2)  | 107(2) | 43(1)  | 29(2)  | 6(1)   | 44(2)  |
| C(12) | 54(2)  | 80(2)  | 41(1)  | 15(1)  | 9(1)   | 31(1)  |
| C(13) | 27(1)  | 27(1)  | 32(1)  | -8(1)  | -3(1)  | 6(1)   |
| C(14) | 38(1)  | 28(1)  | 35(1)  | -7(1)  | -10(1) | 1(1)   |
| C(15) | 54(1)  | 43(1)  | 52(1)  | 8(1)   | 2(1)   | 3(1)   |
| C(16) | 73(2)  | 64(2)  | 54(1)  | 14(1)  | 6(1)   | -12(2) |
| C(17) | 102(3) | 47(1)  | 58(2)  | 19(1)  | -23(2) | -14(2) |
| C(18) | 85(2)  | 44(1)  | 72(2)  | 15(1)  | -16(2) | 14(1)  |
| C(19) | 57(1)  | 38(1)  | 53(1)  | -1(1)  | -9(1)  | 17(1)  |
| C(20) | 35(1)  | 32(1)  | 32(1)  | -6(1)  | -7(1)  | 4(1)   |
| C(21) | 68(2)  | 42(1)  | 36(1)  | -5(1)  | -6(1)  | 0(1)   |
| C(22) | 118(3) | 52(2)  | 68(2)  | 13(1)  | -35(2) | 2(2)   |
| C(23) | 42(1)  | 36(1)  | 35(1)  | -9(1)  | -7(1)  | 5(1)   |
| C(24) | 56(1)  | 51(1)  | 47(1)  | -17(1) | -19(1) | 10(1)  |
| C(25) | 43(1)  | 39(1)  | 28(1)  | -6(1)  | -10(1) | -2(1)  |
| C(26) | 47(1)  | 57(1)  | 41(1)  | -9(1)  | 1(1)   | -16(1) |
| C(27) | 83(2)  | 39(1)  | 54(1)  | -9(1)  | -4(1)  | -22(1) |
| C(28) | 66(2)  | 51(1)  | 41(1)  | -14(1) | -9(1)  | 12(1)  |
| C(29) | 44(1)  | 78(2)  | 39(1)  | -10(1) | 4(1)   | -2(2)  |
| C(30) | 53(2)  | 51(1)  | 44(1)  | -3(1)  | 0(1)   | -18(1) |

---

**Table 5. Hydrogen coordinates ( $\times 10^4$ ) and isotropic displacement parameters ( $\text{\AA}^2 \times 10^3$ )**

for  $C_{30}H_{30}NOP$  (10)

|        | x         | y        | z        | U(eq) |
|--------|-----------|----------|----------|-------|
| H(1N)  | 6780(40)  | 1537(12) | 1182(8)  | 34    |
| H(2)   | 6441      | 2856     | 950      | 57    |
| H(3)   | 5656      | 4222     | 884      | 65    |
| H(4)   | 8251      | 5135     | 1241     | 62    |
| H(5)   | 11628     | 4701     | 1670     | 97    |
| H(6)   | 12359     | 3344     | 1761     | 76    |
| H(8)   | 6629      | 2346     | 2161     | 67    |
| H(9)   | 6128      | 2109     | 2979     | 66    |
| H(10)  | 8949      | 1357     | 3393     | 58    |
| H(11)  | 12454     | 919      | 3010     | 90    |
| H(12)  | 12976     | 1148     | 2187     | 70    |
| H(13)  | 10360(40) | 603(11)  | 871(7)   | 35    |
| H(15)  | 4874      | 406      | 1576     | 59    |
| H(16)  | 4185      | -566     | 2157     | 77    |
| H(17)  | 6983      | -1601    | 2259     | 83    |
| H(18)  | 10498     | -1649    | 1788     | 80    |
| H(19)  | 11207     | -669     | 1219     | 60    |
| H(20)  | 5410(40)  | 495(12)  | 561(7)   | 39    |
| H(21)  | 9371      | 1236     | 63       | 58    |
| H(22A) | 4370(70)  | 1590(20) | 86(12)   | 95    |
| H(22B) | 6680(60)  | 2030(20) | -255(12) | 95    |
| H(23)  | 9606      | -324     | 182      | 45    |
| H(7B)  | 7572      | -749     | 501      | 45    |
| H(24A) | 4629      | -585     | -104     | 62    |
| H(24B) | 6488      | -69      | -416     | 62    |
| H(26)  | 4532      | -2005    | -222     | 58    |
| H(27)  | 5922      | -3139    | -611     | 70    |
| H(28)  | 9484      | -3114    | -1060    | 63    |
| H(29)  | 11689     | -1941    | -1118    | 64    |
| H(30)  | 10287     | -791     | -741     | 59    |

**Table 6. Torsion angles [°] for C<sub>30</sub>H<sub>30</sub>NOP (10)**

|                        |             |
|------------------------|-------------|
| O(1)-P(1)-N(1)-C(13)   | 32.32(17)   |
| C(1)-P(1)-N(1)-C(13)   | 157.18(14)  |
| C(7)-P(1)-N(1)-C(13)   | -91.49(16)  |
| O(1)-P(1)-C(1)-C(2)    | 123.78(17)  |
| N(1)-P(1)-C(1)-C(2)    | 0.20(19)    |
| C(7)-P(1)-C(1)-C(2)    | -115.85(18) |
| O(1)-P(1)-C(1)-C(6)    | -53.9(2)    |
| N(1)-P(1)-C(1)-C(6)    | -177.49(19) |
| C(7)-P(1)-C(1)-C(6)    | 66.5(2)     |
| C(6)-C(1)-C(2)-C(3)    | -1.8(3)     |
| P(1)-C(1)-C(2)-C(3)    | -179.48(19) |
| C(1)-C(2)-C(3)-C(4)    | 1.6(4)      |
| C(2)-C(3)-C(4)-C(5)    | -0.1(4)     |
| C(3)-C(4)-C(5)-C(6)    | -1.1(5)     |
| C(2)-C(1)-C(6)-C(5)    | 0.7(4)      |
| P(1)-C(1)-C(6)-C(5)    | 178.5(3)    |
| C(4)-C(5)-C(6)-C(1)    | 0.8(5)      |
| O(1)-P(1)-C(7)-C(12)   | -12.0(2)    |
| N(1)-P(1)-C(7)-C(12)   | 112.92(19)  |
| C(1)-P(1)-C(7)-C(12)   | -134.92(18) |
| O(1)-P(1)-C(7)-C(8)    | 166.88(17)  |
| N(1)-P(1)-C(7)-C(8)    | -68.24(19)  |
| C(1)-P(1)-C(7)-C(8)    | 43.91(19)   |
| C(12)-C(7)-C(8)-C(9)   | -2.0(4)     |
| P(1)-C(7)-C(8)-C(9)    | 179.1(2)    |
| C(7)-C(8)-C(9)-C(10)   | -0.2(4)     |
| C(8)-C(9)-C(10)-C(11)  | 2.6(4)      |
| C(9)-C(10)-C(11)-C(12) | -2.7(5)     |
| C(8)-C(7)-C(12)-C(11)  | 1.9(4)      |
| P(1)-C(7)-C(12)-C(11)  | -179.3(2)   |
| C(10)-C(11)-C(12)-C(7) | 0.5(5)      |
| P(1)-N(1)-C(13)-C(14)  | 84.0(2)     |
| P(1)-N(1)-C(13)-C(20)  | -149.53(14) |

|                         |             |
|-------------------------|-------------|
| N(1)-C(13)-C(14)-C(15)  | 44.7(2)     |
| C(20)-C(13)-C(14)-C(15) | -79.2(2)    |
| N(1)-C(13)-C(14)-C(19)  | -135.40(18) |
| C(20)-C(13)-C(14)-C(19) | 100.7(2)    |
| C(19)-C(14)-C(15)-C(16) | 0.8(3)      |
| C(13)-C(14)-C(15)-C(16) | -179.3(2)   |
| C(14)-C(15)-C(16)-C(17) | -0.9(4)     |
| C(15)-C(16)-C(17)-C(18) | 0.5(4)      |
| C(16)-C(17)-C(18)-C(19) | 0.0(4)      |
| C(17)-C(18)-C(19)-C(14) | -0.1(4)     |
| C(15)-C(14)-C(19)-C(18) | -0.3(3)     |
| C(13)-C(14)-C(19)-C(18) | 179.8(2)    |
| N(1)-C(13)-C(20)-C(21)  | 51.5(2)     |
| C(14)-C(13)-C(20)-C(21) | 177.98(17)  |
| N(1)-C(13)-C(20)-C(23)  | 173.53(17)  |
| C(14)-C(13)-C(20)-C(23) | -60.0(2)    |
| C(23)-C(20)-C(21)-C(22) | 115.4(3)    |
| C(13)-C(20)-C(21)-C(22) | -122.7(3)   |
| C(21)-C(20)-C(23)-C(24) | -61.9(3)    |
| C(13)-C(20)-C(23)-C(24) | 176.50(19)  |
| C(20)-C(23)-C(24)-C(25) | 173.42(19)  |
| C(23)-C(24)-C(25)-C(30) | -75.9(3)    |
| C(23)-C(24)-C(25)-C(26) | 103.5(2)    |
| C(30)-C(25)-C(26)-C(27) | -0.6(3)     |
| C(24)-C(25)-C(26)-C(27) | 179.9(2)    |
| C(25)-C(26)-C(27)-C(28) | 0.6(4)      |
| C(26)-C(27)-C(28)-C(29) | 0.1(4)      |
| C(27)-C(28)-C(29)-C(30) | -0.7(3)     |
| C(26)-C(25)-C(30)-C(29) | 0.0(3)      |
| C(24)-C(25)-C(30)-C(29) | 179.5(2)    |
| C(28)-C(29)-C(30)-C(25) | 0.7(3)      |

---

Symmetry transformations used to generate equivalent atoms:

**Table 7. Hydrogen bonds for C<sub>30</sub>H<sub>30</sub>NOP (10) [Å and °]**

| D-H...A             | d(D-H)  | d(H...A) | d(D...A) | <(DHA) |
|---------------------|---------|----------|----------|--------|
| N(1)-H(1N)...O(1)#1 | 0.78(2) | 2.21(2)  | 2.987(2) | 174(2) |

Symmetry transformations used to generate equivalent atoms:

#1 x-1,y,z

### X-ray Crystal Structure of 11 (Figure 3c)

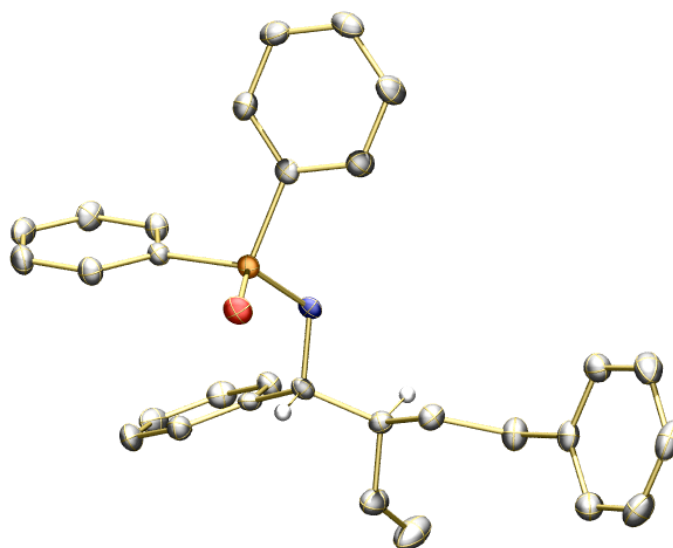

**Table 1. Crystal data and structure refinement for C<sub>30</sub>H<sub>30</sub>NOP (11)**

|                      |                                     |                |
|----------------------|-------------------------------------|----------------|
| Identification code  | C <sub>30</sub> H <sub>30</sub> NOP |                |
| Empirical formula    | C <sub>30</sub> H <sub>30</sub> NOP |                |
| Formula weight       | 451.52                              |                |
| Temperature          | 100(2) K                            |                |
| Wavelength           | 0.71073 Å                           |                |
| Crystal system       | Monoclinic                          |                |
| Space group          | P2(1)                               |                |
| Unit cell dimensions | a = 10.7855(5) Å                    | α = 90°        |
|                      | b = 10.0513(5) Å                    | β = 93.331(3)° |
|                      | c = 11.6042(6) Å                    | γ = 90°        |
| Volume               | 1255.87(11) Å <sup>3</sup>          |                |
| Z                    | 2                                   |                |

|                                   |                                             |
|-----------------------------------|---------------------------------------------|
| Density (calculated)              | 1.194 Mg/m <sup>3</sup>                     |
| Absorption coefficient            | 0.132 mm <sup>-1</sup>                      |
| F(000)                            | 480                                         |
| Crystal size                      | 0.25 x 0.08 x 0.05 mm <sup>3</sup>          |
| Theta range for data collection   | 1.76 to 28.33°                              |
| Index ranges                      | -14<=h<=14, -12<=k<=13, -15<=l<=15          |
| Reflections collected             | 20929                                       |
| Independent reflections           | 6086 [R(int) = 0.0557]                      |
| Completeness to theta = 28.33°    | 99.5 %                                      |
| Absorption correction             | Semi-empirical from equivalents             |
| Max. and min. transmission        | 0.9935 and 0.9679                           |
| Refinement method                 | Full-matrix least-squares on F <sup>2</sup> |
| Data / restraints / parameters    | 6086 / 6 / 313                              |
| Goodness-of-fit on F <sup>2</sup> | 1.028                                       |
| Final R indices [I>2sigma(I)]     | R1 = 0.0402, wR2 = 0.0759                   |
| R indices (all data)              | R1 = 0.0599, wR2 = 0.0827                   |
| Absolute structure parameter      | -0.09(7)                                    |
| Extinction coefficient            | na                                          |
| Largest diff. peak and hole       | 0.289 and -0.247 e.Å <sup>-3</sup>          |

**Table 2. Atomic coordinates ( x 10<sup>4</sup>) and equivalent isotropic displacement parameters (Å<sup>2</sup> x 10<sup>3</sup>) for C<sub>30</sub>H<sub>30</sub>NOP (11). U(eq) is defined as one third of the trace of the orthogonalized U<sup>ij</sup> tensor.**

|      | x       | y        | z       | U(eq) |
|------|---------|----------|---------|-------|
| P(1) | -133(1) | 612(1)   | 4531(1) | 16(1) |
| O(1) | 102(1)  | 2053(1)  | 4761(1) | 22(1) |
| N(1) | -146(1) | -242(2)  | 5733(1) | 16(1) |
| C(1) | 1070(2) | -166(2)  | 3747(2) | 18(1) |
| C(2) | 2273(2) | -174(2)  | 4250(2) | 25(1) |
| C(3) | 3254(2) | -654(2)  | 3642(2) | 28(1) |
| C(4) | 3037(2) | -1123(2) | 2532(2) | 26(1) |
| C(5) | 1845(2) | -1124(2) | 2025(2) | 27(1) |



|       |          |          |          |       |
|-------|----------|----------|----------|-------|
| C(6)  | 869(2)   | -636(2)  | 2627(2)  | 24(1) |
| C(7)  | -1556(2) | 397(2)   | 3651(2)  | 18(1) |
| C(8)  | -2129(2) | 1510(2)  | 3138(2)  | 23(1) |
| C(9)  | -3203(2) | 1356(2)  | 2431(2)  | 27(1) |
| C(10) | -3700(2) | 100(2)   | 2233(2)  | 26(1) |
| C(11) | -3145(2) | -1009(2) | 2750(2)  | 26(1) |
| C(12) | -2074(2) | -865(2)  | 3464(2)  | 22(1) |
| C(13) | -906(2)  | 226(2)   | 6671(2)  | 17(1) |
| C(14) | -2240(2) | -265(2)  | 6510(2)  | 18(1) |
| C(15) | -3162(2) | 610(2)   | 6114(2)  | 23(1) |
| C(16) | -4386(2) | 180(2)   | 5924(2)  | 29(1) |
| C(17) | -4689(2) | -1129(2) | 6137(2)  | 30(1) |
| C(18) | -3771(2) | -2013(2) | 6529(2)  | 27(1) |
| C(19) | -2556(2) | -1583(2) | 6709(2)  | 23(1) |
| C(20) | -265(2)  | -147(2)  | 7849(2)  | 19(1) |
| C(21) | -1071(2) | 234(2)   | 8814(2)  | 30(1) |
| C(22) | -1255(2) | -473(3)  | 9747(2)  | 46(1) |
| C(23) | 1008(2)  | 542(2)   | 8016(2)  | 21(1) |
| C(24) | 1794(2)  | -29(2)   | 9043(2)  | 28(1) |
| C(25) | 3003(2)  | 696(2)   | 9289(2)  | 22(1) |
| C(26) | 4026(2)  | 438(2)   | 8655(2)  | 26(1) |
| C(27) | 5127(2)  | 1131(2)  | 8865(2)  | 31(1) |
| C(28) | 5209(2)  | 2115(2)  | 9700(2)  | 32(1) |
| C(29) | 4202(2)  | 2380(2)  | 10329(2) | 33(1) |
| C(30) | 3110(2)  | 1666(2)  | 10136(2) | 28(1) |

**Table 3. Bond lengths [Å] and angles [°] for C<sub>30</sub>H<sub>30</sub>NOP (11)**

|            |            |
|------------|------------|
| P(1)-O(1)  | 1.4922(13) |
| P(1)-N(1)  | 1.6385(16) |
| P(1)-C(1)  | 1.8060(19) |
| P(1)-C(7)  | 1.8061(17) |
| N(1)-C(13) | 1.477(2)   |
| N(1)-H(1N) | 0.854(15)  |

|             |           |
|-------------|-----------|
| C(1)-C(6)   | 1.388(3)  |
| C(1)-C(2)   | 1.391(3)  |
| C(2)-C(3)   | 1.391(3)  |
| C(2)-H(2)   | 0.9500    |
| C(3)-C(4)   | 1.378(3)  |
| C(3)-H(3)   | 0.9500    |
| C(4)-C(5)   | 1.383(3)  |
| C(4)-H(4)   | 0.9500    |
| C(5)-C(6)   | 1.386(3)  |
| C(5)-H(5)   | 0.9500    |
| C(6)-H(6)   | 0.9500    |
| C(7)-C(8)   | 1.395(3)  |
| C(7)-C(12)  | 1.398(3)  |
| C(8)-C(9)   | 1.389(3)  |
| C(8)-H(8)   | 0.9500    |
| C(9)-C(10)  | 1.385(3)  |
| C(9)-H(9)   | 0.9500    |
| C(10)-C(11) | 1.386(3)  |
| C(10)-H(10) | 0.9500    |
| C(11)-C(12) | 1.389(3)  |
| C(11)-H(11) | 0.9500    |
| C(12)-H(12) | 0.9500    |
| C(13)-C(14) | 1.522(2)  |
| C(13)-C(20) | 1.541(3)  |
| C(13)-H(13) | 0.976(15) |
| C(14)-C(15) | 1.387(3)  |
| C(14)-C(19) | 1.390(3)  |
| C(15)-C(16) | 1.394(3)  |
| C(15)-H(15) | 0.9500    |
| C(16)-C(17) | 1.382(3)  |
| C(16)-H(16) | 0.9500    |
| C(17)-C(18) | 1.387(3)  |
| C(17)-H(17) | 0.9500    |
| C(18)-C(19) | 1.385(3)  |
| C(18)-H(18) | 0.9500    |
| C(19)-H(19) | 0.9500    |

|                  |            |
|------------------|------------|
| C(20)-C(21)      | 1.507(3)   |
| C(20)-C(23)      | 1.541(2)   |
| C(20)-H(20)      | 1.029(15)  |
| C(21)-C(22)      | 1.318(3)   |
| C(21)-H(21)      | 0.9500     |
| C(22)-H(22A)     | 1.036(17)  |
| C(22)-H(22B)     | 0.995(16)  |
| C(23)-C(24)      | 1.534(3)   |
| C(23)-H(23A)     | 0.9900     |
| C(23)-H(23B)     | 0.9900     |
| C(24)-C(25)      | 1.506(3)   |
| C(24)-H(24A)     | 0.9900     |
| C(24)-H(24B)     | 0.9900     |
| C(25)-C(30)      | 1.385(3)   |
| C(25)-C(26)      | 1.386(3)   |
| C(26)-C(27)      | 1.385(3)   |
| C(26)-H(26)      | 0.9500     |
| C(27)-C(28)      | 1.385(3)   |
| C(27)-H(27)      | 0.9500     |
| C(28)-C(29)      | 1.370(3)   |
| C(28)-H(28)      | 0.9500     |
| C(29)-C(30)      | 1.386(3)   |
| C(29)-H(29)      | 0.9500     |
| C(30)-H(30)      | 0.9500     |
| O(1)-P(1)-N(1)   | 111.48(8)  |
| O(1)-P(1)-C(1)   | 113.01(8)  |
| N(1)-P(1)-C(1)   | 104.15(8)  |
| O(1)-P(1)-C(7)   | 110.32(8)  |
| N(1)-P(1)-C(7)   | 111.69(8)  |
| C(1)-P(1)-C(7)   | 105.95(8)  |
| C(13)-N(1)-P(1)  | 119.56(12) |
| C(13)-N(1)-H(1N) | 113.2(13)  |
| P(1)-N(1)-H(1N)  | 115.6(14)  |
| C(6)-C(1)-C(2)   | 118.85(17) |
| C(6)-C(1)-P(1)   | 122.79(14) |
| C(2)-C(1)-P(1)   | 118.06(14) |

|                   |            |
|-------------------|------------|
| C(3)-C(2)-C(1)    | 120.43(18) |
| C(3)-C(2)-H(2)    | 119.8      |
| C(1)-C(2)-H(2)    | 119.8      |
| C(4)-C(3)-C(2)    | 120.01(18) |
| C(4)-C(3)-H(3)    | 120.0      |
| C(2)-C(3)-H(3)    | 120.0      |
| C(3)-C(4)-C(5)    | 120.02(18) |
| C(3)-C(4)-H(4)    | 120.0      |
| C(5)-C(4)-H(4)    | 120.0      |
| C(4)-C(5)-C(6)    | 120.01(19) |
| C(4)-C(5)-H(5)    | 120.0      |
| C(6)-C(5)-H(5)    | 120.0      |
| C(5)-C(6)-C(1)    | 120.67(18) |
| C(5)-C(6)-H(6)    | 119.7      |
| C(1)-C(6)-H(6)    | 119.7      |
| C(8)-C(7)-C(12)   | 119.88(17) |
| C(8)-C(7)-P(1)    | 119.11(14) |
| C(12)-C(7)-P(1)   | 121.01(14) |
| C(9)-C(8)-C(7)    | 119.77(19) |
| C(9)-C(8)-H(8)    | 120.1      |
| C(7)-C(8)-H(8)    | 120.1      |
| C(10)-C(9)-C(8)   | 120.09(19) |
| C(10)-C(9)-H(9)   | 120.0      |
| C(8)-C(9)-H(9)    | 120.0      |
| C(9)-C(10)-C(11)  | 120.54(18) |
| C(9)-C(10)-H(10)  | 119.7      |
| C(11)-C(10)-H(10) | 119.7      |
| C(10)-C(11)-C(12) | 119.84(19) |
| C(10)-C(11)-H(11) | 120.1      |
| C(12)-C(11)-H(11) | 120.1      |
| C(11)-C(12)-C(7)  | 119.87(18) |
| C(11)-C(12)-H(12) | 120.1      |
| C(7)-C(12)-H(12)  | 120.1      |
| N(1)-C(13)-C(14)  | 111.56(15) |
| N(1)-C(13)-C(20)  | 109.66(14) |
| C(14)-C(13)-C(20) | 113.69(15) |

|                     |            |
|---------------------|------------|
| N(1)-C(13)-H(13)    | 105.6(12)  |
| C(14)-C(13)-H(13)   | 109.4(11)  |
| C(20)-C(13)-H(13)   | 106.5(12)  |
| C(15)-C(14)-C(19)   | 118.80(17) |
| C(15)-C(14)-C(13)   | 119.30(17) |
| C(19)-C(14)-C(13)   | 121.86(17) |
| C(14)-C(15)-C(16)   | 120.7(2)   |
| C(14)-C(15)-H(15)   | 119.7      |
| C(16)-C(15)-H(15)   | 119.7      |
| C(17)-C(16)-C(15)   | 119.9(2)   |
| C(17)-C(16)-H(16)   | 120.0      |
| C(15)-C(16)-H(16)   | 120.0      |
| C(16)-C(17)-C(18)   | 119.80(19) |
| C(16)-C(17)-H(17)   | 120.1      |
| C(18)-C(17)-H(17)   | 120.1      |
| C(19)-C(18)-C(17)   | 120.0(2)   |
| C(19)-C(18)-H(18)   | 120.0      |
| C(17)-C(18)-H(18)   | 120.0      |
| C(18)-C(19)-C(14)   | 120.79(18) |
| C(18)-C(19)-H(19)   | 119.6      |
| C(14)-C(19)-H(19)   | 119.6      |
| C(21)-C(20)-C(23)   | 109.95(15) |
| C(21)-C(20)-C(13)   | 110.43(15) |
| C(23)-C(20)-C(13)   | 110.68(15) |
| C(21)-C(20)-H(20)   | 106.6(11)  |
| C(23)-C(20)-H(20)   | 108.1(11)  |
| C(13)-C(20)-H(20)   | 111.0(12)  |
| C(22)-C(21)-C(20)   | 126.5(2)   |
| C(22)-C(21)-H(21)   | 116.8      |
| C(20)-C(21)-H(21)   | 116.8      |
| C(21)-C(22)-H(22A)  | 117.9(15)  |
| C(21)-C(22)-H(22B)  | 121.8(16)  |
| H(22A)-C(22)-H(22B) | 120(2)     |
| C(24)-C(23)-C(20)   | 112.22(16) |
| C(24)-C(23)-H(23A)  | 109.2      |
| C(20)-C(23)-H(23A)  | 109.2      |

|                     |            |
|---------------------|------------|
| C(24)-C(23)-H(23B)  | 109.2      |
| C(20)-C(23)-H(23B)  | 109.2      |
| H(23A)-C(23)-H(23B) | 107.9      |
| C(25)-C(24)-C(23)   | 113.51(17) |
| C(25)-C(24)-H(24A)  | 108.9      |
| C(23)-C(24)-H(24A)  | 108.9      |
| C(25)-C(24)-H(24B)  | 108.9      |
| C(23)-C(24)-H(24B)  | 108.9      |
| H(24A)-C(24)-H(24B) | 107.7      |
| C(30)-C(25)-C(26)   | 118.15(18) |
| C(30)-C(25)-C(24)   | 120.71(18) |
| C(26)-C(25)-C(24)   | 121.11(19) |
| C(27)-C(26)-C(25)   | 120.9(2)   |
| C(27)-C(26)-H(26)   | 119.5      |
| C(25)-C(26)-H(26)   | 119.5      |
| C(28)-C(27)-C(26)   | 120.1(2)   |
| C(28)-C(27)-H(27)   | 119.9      |
| C(26)-C(27)-H(27)   | 119.9      |
| C(29)-C(28)-C(27)   | 119.4(2)   |
| C(29)-C(28)-H(28)   | 120.3      |
| C(27)-C(28)-H(28)   | 120.3      |
| C(28)-C(29)-C(30)   | 120.4(2)   |
| C(28)-C(29)-H(29)   | 119.8      |
| C(30)-C(29)-H(29)   | 119.8      |
| C(25)-C(30)-C(29)   | 120.96(19) |
| C(25)-C(30)-H(30)   | 119.5      |
| C(29)-C(30)-H(30)   | 119.5      |

---

Symmetry transformations used to generate equivalent atoms:

**Table 4. Anisotropic displacement parameters ( $\text{\AA}^2 \times 10^3$ ) for  $\text{C}_{30}\text{H}_{30}\text{NOP}$  (11). The anisotropic displacement factor exponent takes the form:  $-2p^2 [ h^2 a^* U_{11} + \dots + 2 h k a^* b^* U_{12} ]$**

---

|     |     |     |     |     |     |
|-----|-----|-----|-----|-----|-----|
| U11 | U22 | U33 | U23 | U13 | U12 |
|-----|-----|-----|-----|-----|-----|

---

|       |       |       |       |       |       |        |
|-------|-------|-------|-------|-------|-------|--------|
| P(1)  | 17(1) | 11(1) | 19(1) | 0(1)  | 0(1)  | -1(1)  |
| O(1)  | 26(1) | 12(1) | 28(1) | -1(1) | 1(1)  | -2(1)  |
| N(1)  | 19(1) | 8(1)  | 21(1) | -1(1) | 2(1)  | 1(1)   |
| C(1)  | 20(1) | 13(1) | 21(1) | 3(1)  | 3(1)  | -1(1)  |
| C(2)  | 24(1) | 26(1) | 26(1) | -5(1) | 0(1)  | -1(1)  |
| C(3)  | 20(1) | 29(1) | 35(1) | -5(1) | 2(1)  | 0(1)   |
| C(4)  | 27(1) | 20(1) | 31(1) | 3(1)  | 12(1) | 2(1)   |
| C(5)  | 34(1) | 28(1) | 19(1) | 0(1)  | 6(1)  | 2(1)   |
| C(6)  | 26(1) | 26(1) | 21(1) | 3(1)  | -1(1) | 0(1)   |
| C(7)  | 16(1) | 18(1) | 19(1) | 1(1)  | 2(1)  | 1(1)   |
| C(8)  | 23(1) | 19(1) | 26(1) | 2(1)  | 0(1)  | 1(1)   |
| C(9)  | 24(1) | 28(1) | 28(1) | 5(1)  | -2(1) | 6(1)   |
| C(10) | 17(1) | 39(1) | 23(1) | -1(1) | -2(1) | -1(1)  |
| C(11) | 23(1) | 28(1) | 29(1) | -2(1) | -2(1) | -8(1)  |
| C(12) | 21(1) | 19(1) | 26(1) | 2(1)  | -1(1) | -1(1)  |
| C(13) | 18(1) | 12(1) | 22(1) | -2(1) | 2(1)  | 2(1)   |
| C(14) | 20(1) | 20(1) | 16(1) | -4(1) | 3(1)  | 1(1)   |
| C(15) | 22(1) | 23(1) | 24(1) | -3(1) | 0(1)  | 2(1)   |
| C(16) | 20(1) | 37(1) | 29(1) | -2(1) | -2(1) | 7(1)   |
| C(17) | 18(1) | 40(1) | 30(1) | -9(1) | 3(1)  | -4(1)  |
| C(18) | 28(1) | 25(1) | 29(1) | -2(1) | 5(1)  | -7(1)  |
| C(19) | 21(1) | 20(1) | 28(1) | 0(1)  | 2(1)  | 2(1)   |
| C(20) | 21(1) | 18(1) | 18(1) | -1(1) | 1(1)  | -1(1)  |
| C(21) | 25(1) | 40(1) | 27(1) | -6(1) | 2(1)  | -1(1)  |
| C(22) | 37(1) | 74(2) | 29(1) | -4(1) | 6(1)  | -15(1) |
| C(23) | 22(1) | 22(1) | 21(1) | 0(1)  | 1(1)  | -4(1)  |
| C(24) | 24(1) | 29(1) | 29(1) | 6(1)  | -3(1) | -2(1)  |
| C(25) | 22(1) | 23(1) | 21(1) | 7(1)  | -3(1) | 0(1)   |
| C(26) | 27(1) | 25(1) | 26(1) | 2(1)  | 1(1)  | 4(1)   |
| C(27) | 24(1) | 41(1) | 28(1) | 7(1)  | 3(1)  | 3(1)   |
| C(28) | 29(1) | 42(1) | 25(1) | 9(1)  | -8(1) | -12(1) |
| C(29) | 40(1) | 34(1) | 25(1) | -3(1) | -6(1) | -5(1)  |
| C(30) | 25(1) | 35(1) | 24(1) | 1(1)  | 2(1)  | 4(1)   |

---

**Table 5. Hydrogen coordinates (  $\times 10^4$ ) and isotropic displacement parameters ( $\text{\AA}^2 \times 10^{-3}$ ) for  $\text{C}_{30}\text{H}_{30}\text{NOP}$  (11)**

|        | x         | y         | z         | U(eq) |
|--------|-----------|-----------|-----------|-------|
| H(1N)  | -151(17)  | -1087(16) | 5655(18)  | 19    |
| H(2)   | 2426      | 151       | 5014      | 30    |
| H(3)   | 4072      | -658      | 3992      | 34    |
| H(4)   | 3708      | -1446     | 2116      | 31    |
| H(5)   | 1695      | -1459     | 1264      | 32    |
| H(6)   | 54        | -624      | 2269      | 29    |
| H(8)   | -1786     | 2371      | 3273      | 27    |
| H(9)   | -3597     | 2112      | 2083      | 32    |
| H(10)  | -4427     | -1        | 1738      | 32    |
| H(11)  | -3495     | -1866     | 2616      | 32    |
| H(12)  | -1696     | -1623     | 3826      | 26    |
| H(13)  | -895(17)  | 1196(15)  | 6627(17)  | 21    |
| H(15)  | -2958     | 1512      | 5970      | 27    |
| H(16)  | -5011     | 787       | 5649      | 34    |
| H(17)  | -5524     | -1423     | 6015      | 35    |
| H(18)  | -3977     | -2915     | 6673      | 33    |
| H(19)  | -1930     | -2195     | 6971      | 28    |
| H(20)  | -127(17)  | -1158(16) | 7911(18)  | 23    |
| H(21)  | -1489     | 1065      | 8744      | 37    |
| H(22A) | -790(20)  | -1370(20) | 9850(20)  | 56    |
| H(22B) | -1780(20) | -140(30)  | 10363(18) | 56    |
| H(23A) | 1464      | 435       | 7305      | 26    |
| H(23B) | 881       | 1506      | 8140      | 26    |



|        |      |      |       |    |
|--------|------|------|-------|----|
| H(24A) | 1306 | 8    | 9739  | 33 |
| H(24B) | 1974 | -976 | 8888  | 33 |
| H(26)  | 3973 | -222 | 8069  | 31 |
| H(27)  | 5826 | 930  | 8435  | 37 |
| H(28)  | 5958 | 2602 | 9837  | 39 |
| H(29)  | 4252 | 3058 | 10901 | 40 |
| H(30)  | 2426 | 1844 | 10593 | 33 |

**Table 6. Torsion angles [°] for C<sub>30</sub>H<sub>30</sub>NOP (11)**

|                      |             |
|----------------------|-------------|
| O(1)-P(1)-N(1)-C(13) | 49.52(15)   |
| C(1)-P(1)-N(1)-C(13) | 171.68(13)  |
| C(7)-P(1)-N(1)-C(13) | -74.41(15)  |
| O(1)-P(1)-C(1)-C(6)  | -112.97(16) |
| N(1)-P(1)-C(1)-C(6)  | 125.88(16)  |
| C(7)-P(1)-C(1)-C(6)  | 7.95(18)    |
| O(1)-P(1)-C(1)-C(2)  | 60.64(17)   |
| N(1)-P(1)-C(1)-C(2)  | -60.51(17)  |
| C(7)-P(1)-C(1)-C(2)  | -178.45(15) |
| C(6)-C(1)-C(2)-C(3)  | -0.5(3)     |
| P(1)-C(1)-C(2)-C(3)  | -174.31(16) |
| C(1)-C(2)-C(3)-C(4)  | 0.2(3)      |
| C(2)-C(3)-C(4)-C(5)  | -0.4(3)     |
| C(3)-C(4)-C(5)-C(6)  | 0.9(3)      |
| C(4)-C(5)-C(6)-C(1)  | -1.2(3)     |
| C(2)-C(1)-C(6)-C(5)  | 1.0(3)      |
| P(1)-C(1)-C(6)-C(5)  | 174.51(16)  |
| O(1)-P(1)-C(7)-C(8)  | 10.78(17)   |
| N(1)-P(1)-C(7)-C(8)  | 135.36(14)  |
| C(1)-P(1)-C(7)-C(8)  | -111.86(15) |
| O(1)-P(1)-C(7)-C(12) | -170.18(14) |
| N(1)-P(1)-C(7)-C(12) | -45.60(17)  |
| C(1)-P(1)-C(7)-C(12) | 67.18(16)   |
| C(12)-C(7)-C(8)-C(9) | -1.0(3)     |

|                         |             |
|-------------------------|-------------|
| P(1)-C(7)-C(8)-C(9)     | 178.07(14)  |
| C(7)-C(8)-C(9)-C(10)    | -0.2(3)     |
| C(8)-C(9)-C(10)-C(11)   | 1.0(3)      |
| C(9)-C(10)-C(11)-C(12)  | -0.6(3)     |
| C(10)-C(11)-C(12)-C(7)  | -0.6(3)     |
| C(8)-C(7)-C(12)-C(11)   | 1.4(3)      |
| P(1)-C(7)-C(12)-C(11)   | -177.65(15) |
| P(1)-N(1)-C(13)-C(14)   | 85.70(17)   |
| P(1)-N(1)-C(13)-C(20)   | -147.44(13) |
| N(1)-C(13)-C(14)-C(15)  | -103.98(19) |
| C(20)-C(13)-C(14)-C(15) | 131.38(17)  |
| N(1)-C(13)-C(14)-C(19)  | 73.6(2)     |
| C(20)-C(13)-C(14)-C(19) | -51.1(2)    |
| C(19)-C(14)-C(15)-C(16) | 0.4(3)      |
| C(13)-C(14)-C(15)-C(16) | 178.03(17)  |
| C(14)-C(15)-C(16)-C(17) | 0.3(3)      |
| C(15)-C(16)-C(17)-C(18) | -0.6(3)     |
| C(16)-C(17)-C(18)-C(19) | 0.2(3)      |
| C(17)-C(18)-C(19)-C(14) | 0.5(3)      |
| C(15)-C(14)-C(19)-C(18) | -0.8(3)     |
| C(13)-C(14)-C(19)-C(18) | -178.38(18) |
| N(1)-C(13)-C(20)-C(21)  | -175.90(16) |
| C(14)-C(13)-C(20)-C(21) | -50.2(2)    |
| N(1)-C(13)-C(20)-C(23)  | 62.1(2)     |
| C(14)-C(13)-C(20)-C(23) | -172.23(16) |
| C(23)-C(20)-C(21)-C(22) | -98.5(2)    |
| C(13)-C(20)-C(21)-C(22) | 139.1(2)    |
| C(21)-C(20)-C(23)-C(24) | 70.2(2)     |
| C(13)-C(20)-C(23)-C(24) | -167.56(16) |
| C(20)-C(23)-C(24)-C(25) | -175.36(17) |
| C(23)-C(24)-C(25)-C(30) | 97.6(2)     |
| C(23)-C(24)-C(25)-C(26) | -80.7(2)    |
| C(30)-C(25)-C(26)-C(27) | 0.1(3)      |
| C(24)-C(25)-C(26)-C(27) | 178.41(19)  |
| C(25)-C(26)-C(27)-C(28) | -1.4(3)     |
| C(26)-C(27)-C(28)-C(29) | 1.1(3)      |

|                         |             |
|-------------------------|-------------|
| C(27)-C(28)-C(29)-C(30) | 0.3(3)      |
| C(26)-C(25)-C(30)-C(29) | 1.4(3)      |
| C(24)-C(25)-C(30)-C(29) | -176.93(19) |
| C(28)-C(29)-C(30)-C(25) | -1.6(3)     |

Symmetry transformations used to generate equivalent atoms:

**Table 7. Hydrogen bonds for C<sub>30</sub>H<sub>30</sub>NOP (11) [Å and °]**

| D-H...A             | d(D-H)    | d(H...A)  | d(D...A) | <(DHA) |
|---------------------|-----------|-----------|----------|--------|
| N(1)-H(1N)...O(1)#1 | 0.854(15) | 1.932(16) | 2.779(2) | 171(2) |

Symmetry transformations used to generate equivalent atoms:

#1 -x,y-1/2,-z+1

### X-ray Crystal Structure of 13 (Figure 2c)

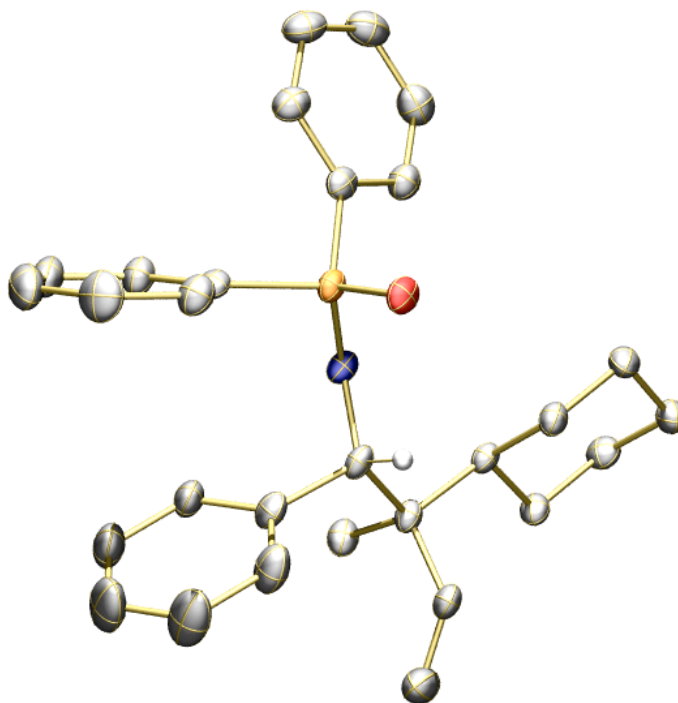

**Table 1. Crystal data and structure refinement for C<sub>29</sub>H<sub>34</sub>NOP (13)**

Identification code C<sub>29</sub>H<sub>34</sub>NOP

|                                   |                                             |                 |
|-----------------------------------|---------------------------------------------|-----------------|
| Empirical formula                 | C <sub>29</sub> H <sub>34</sub> NOP         |                 |
| Formula weight                    | 443.54                                      |                 |
| Temperature                       | 100(2) K                                    |                 |
| Wavelength                        | 0.71073 Å                                   |                 |
| Crystal system                    | Monoclinic                                  |                 |
| Space group                       | P2(1)                                       |                 |
| Unit cell dimensions              | a = 22.5726(15) Å                           | α = 90°         |
|                                   | b = 20.6585(13) Å                           | β = 119.094(4)° |
|                                   | c = 23.0355(15) Å                           | γ = 90°         |
| Volume                            | 9386.5(11) Å <sup>3</sup>                   |                 |
| Z                                 | 12                                          |                 |
| Density (calculated)              | 0.942 Mg/m <sup>3</sup>                     |                 |
| Absorption coefficient            | 0.104 mm <sup>-1</sup>                      |                 |
| F(000)                            | 2856                                        |                 |
| Crystal size                      | 0.15 x 0.06 x 0.05 mm <sup>3</sup>          |                 |
| Theta range for data collection   | 1.41 to 28.81°                              |                 |
| Index ranges                      | -30 ≤ h ≤ 26, -27 ≤ k ≤ 27, 0 ≤ l ≤ 31      |                 |
| Reflections collected             | 48686                                       |                 |
| Independent reflections           | 48686 [R(int) = 0.0000]                     |                 |
| Completeness to theta = 28.81°    | 99.8 %                                      |                 |
| Absorption correction             | Semi-empirical from equivalents             |                 |
| Max. and min. transmission        | 0.9948 and 0.9845                           |                 |
| Refinement method                 | Full-matrix least-squares on F <sup>2</sup> |                 |
| Data / restraints / parameters    | 48686 / 1 / 1729                            |                 |
| Goodness-of-fit on F <sup>2</sup> | 0.998                                       |                 |
| Final R indices [I > 2σ(I)]       | R1 = 0.0492, wR2 = 0.1165                   |                 |
| R indices (all data)              | R1 = 0.0702, wR2 = 0.1245                   |                 |
| Absolute structure parameter      | -0.04(3)                                    |                 |
| Extinction coefficient            | na                                          |                 |
| Largest diff. peak and hole       | 0.458 and -0.341 e.Å <sup>-3</sup>          |                 |

**Table 2. Atomic coordinates ( x 10<sup>4</sup>) and equivalent isotropic displacement parameters (Å<sup>2</sup> x 10<sup>3</sup>) for C<sub>29</sub>H<sub>34</sub>NOP. U(eq) is defined as one third of the trace of the orthogonalized U<sup>ij</sup> tensor.**

|       | x        | y        | z        | U(eq) |
|-------|----------|----------|----------|-------|
| P(1)  | 20(1)    | 2748(1)  | 29(1)    | 18(1) |
| O(1)  | -106(1)  | 3419(1)  | 180(1)   | 22(1) |
| N(1)  | 24(1)    | 2228(1)  | 570(1)   | 20(1) |
| C(1)  | 809(1)   | 2687(1)  | 20(1)    | 21(1) |
| C(2)  | 1116(1)  | 3246(1)  | -40(1)   | 27(1) |
| C(3)  | 1714(1)  | 3207(1)  | -69(1)   | 34(1) |
| C(4)  | 2002(1)  | 2616(1)  | -46(1)   | 34(1) |
| C(5)  | 1701(1)  | 2052(1)  | 14(1)    | 32(1) |
| C(6)  | 1104(1)  | 2086(1)  | 47(1)    | 26(1) |
| C(7)  | -622(1)  | 2507(1)  | -790(1)  | 20(1) |
| C(8)  | -493(1)  | 2454(1)  | -1323(1) | 26(1) |
| C(9)  | -1020(1) | 2356(1)  | -1965(1) | 30(1) |
| C(10) | -1675(1) | 2312(1)  | -2080(1) | 31(1) |
| C(11) | -1813(1) | 2358(1)  | -1554(1) | 29(1) |
| C(12) | -1293(1) | 2457(1)  | -918(1)  | 24(1) |
| C(13) | -22(1)   | 2444(1)  | 1156(1)  | 21(1) |
| C(14) | -751(1)  | 2391(1)  | 1025(1)  | 22(1) |
| C(15) | -1164(1) | 1865(1)  | 695(1)   | 29(1) |
| C(16) | -1833(1) | 1850(1)  | 558(1)   | 35(1) |
| C(17) | -2102(1) | 2353(1)  | 749(1)   | 35(1) |
| C(18) | -1697(1) | 2878(1)  | 1078(1)  | 33(1) |
| C(19) | -1027(1) | 2898(1)  | 1213(1)  | 26(1) |
| C(20) | 514(1)   | 2112(1)  | 1819(1)  | 23(1) |
| C(21) | 337(1)   | 1400(1)  | 1832(1)  | 28(1) |
| C(22) | 507(1)   | 2493(1)  | 2378(1)  | 28(1) |
| C(23) | 402(1)   | 2263(1)  | 2857(1)  | 42(1) |
| C(24) | 1232(1)  | 2165(1)  | 1867(1)  | 29(1) |
| C(25) | 1800(1)  | 1867(1)  | 2513(1)  | 43(1) |
| C(26) | 2485(1)  | 1890(1)  | 2533(2)  | 54(1) |
| C(27) | 2683(1)  | 2570(1)  | 2452(1)  | 49(1) |
| C(28) | 2129(1)  | 2874(1)  | 1813(1)  | 40(1) |
| C(29) | 1442(1)  | 2860(1)  | 1801(1)  | 30(1) |
| P(2)  | 10484(1) | 10148(1) | 10524(1) | 20(1) |

|       |          |          |          |       |
|-------|----------|----------|----------|-------|
| O(2)  | 10410(1) | 10866(1) | 10490(1) | 27(1) |
| N(2)  | 10115(1) | 9825(1)  | 9779(1)  | 22(1) |
| C(30) | 11363(1) | 9912(1)  | 10986(1) | 26(1) |
| C(31) | 11572(1) | 9279(1)  | 11010(1) | 30(1) |
| C(32) | 12242(1) | 9111(1)  | 11377(1) | 43(1) |
| C(33) | 12717(1) | 9580(2)  | 11735(2) | 64(1) |
| C(34) | 12524(1) | 10212(2) | 11709(2) | 73(1) |
| C(35) | 11848(1) | 10390(1) | 11340(2) | 49(1) |
| C(36) | 10058(1) | 9765(1)  | 10924(1) | 20(1) |
| C(37) | 10326(1) | 9285(1)  | 11403(1) | 29(1) |
| C(38) | 9943(1)  | 9022(1)  | 11667(1) | 35(1) |
| C(39) | 9293(1)  | 9239(1)  | 11455(1) | 33(1) |
| C(40) | 9022(1)  | 9722(1)  | 10986(1) | 27(1) |
| C(41) | 9402(1)  | 9985(1)  | 10720(1) | 25(1) |
| C(42) | 10108(1) | 10178(1) | 9223(1)  | 21(1) |
| C(43) | 10784(1) | 10117(1) | 9224(1)  | 24(1) |
| C(44) | 11049(1) | 10648(1) | 9058(1)  | 32(1) |
| C(45) | 11674(1) | 10618(1) | 9087(1)  | 41(1) |
| C(46) | 12052(1) | 10059(1) | 9295(1)  | 43(1) |
| C(47) | 11796(1) | 9523(1)  | 9461(1)  | 36(1) |
| C(48) | 11163(1) | 9552(1)  | 9421(1)  | 27(1) |
| C(49) | 9471(1)  | 9993(1)  | 8551(1)  | 21(1) |
| C(50) | 9561(1)  | 9310(1)  | 8351(1)  | 24(1) |
| C(51) | 9402(1)  | 10486(1) | 8040(1)  | 27(1) |
| C(52) | 9368(1)  | 10367(1) | 7458(1)  | 38(1) |
| C(53) | 8820(1)  | 10020(1) | 8632(1)  | 25(1) |
| C(54) | 8171(1)  | 9881(1)  | 7977(1)  | 34(1) |
| C(55) | 7543(1)  | 9874(1)  | 8067(1)  | 42(1) |
| C(56) | 7465(1)  | 10507(1) | 8360(1)  | 42(1) |
| C(57) | 8108(1)  | 10650(1) | 9014(1)  | 35(1) |
| C(58) | 8733(1)  | 10662(1) | 8922(1)  | 27(1) |
| P(3)  | 4815(1)  | 1138(1)  | 9976(1)  | 18(1) |
| O(3)  | 4684(1)  | 486(1)   | 9662(1)  | 23(1) |
| N(3)  | 4800(1)  | 1703(1)  | 9466(1)  | 19(1) |
| C(59) | 5631(1)  | 1203(1)  | 10714(1) | 20(1) |
| C(60) | 6209(1)  | 1363(1)  | 10680(1) | 27(1) |

|       |         |         |          |       |
|-------|---------|---------|----------|-------|
| C(61) | 6840(1) | 1353(1) | 11252(1) | 33(1) |
| C(62) | 6895(1) | 1182(1) | 11853(1) | 31(1) |
| C(63) | 6325(1) | 1019(1) | 11889(1) | 36(1) |
| C(64) | 5696(1) | 1025(1) | 11327(1) | 29(1) |
| C(65) | 4229(1) | 1314(1) | 10278(1) | 21(1) |
| C(66) | 3818(1) | 827(1)  | 10301(1) | 26(1) |
| C(67) | 3402(1) | 943(1)  | 10577(1) | 30(1) |
| C(68) | 3399(1) | 1544(1) | 10839(1) | 31(1) |
| C(69) | 3807(1) | 2037(1) | 10811(1) | 30(1) |
| C(70) | 4219(1) | 1924(1) | 10536(1) | 27(1) |
| C(71) | 4388(1) | 1600(1) | 8743(1)  | 23(1) |
| C(72) | 3627(1) | 1583(1) | 8509(1)  | 25(1) |
| C(73) | 3332(1) | 2005(1) | 8769(1)  | 28(1) |
| C(74) | 2641(1) | 1998(1) | 8536(1)  | 34(1) |
| C(75) | 2224(1) | 1565(1) | 8042(1)  | 35(1) |
| C(76) | 2518(1) | 1136(1) | 7802(1)  | 37(1) |
| C(77) | 3218(1) | 1142(1) | 8044(1)  | 32(1) |
| C(78) | 4570(1) | 2095(1) | 8338(1)  | 25(1) |
| C(79) | 4282(1) | 2759(1) | 8329(1)  | 24(1) |
| C(80) | 4282(1) | 1821(1) | 7644(1)  | 32(1) |
| C(81) | 3886(1) | 2103(1) | 7080(1)  | 47(1) |
| C(82) | 5367(1) | 2144(1) | 8656(1)  | 26(1) |
| C(83) | 5595(1) | 2600(1) | 8277(1)  | 34(1) |
| C(84) | 6361(1) | 2670(1) | 8629(1)  | 41(1) |
| C(85) | 6716(1) | 2021(1) | 8740(1)  | 42(1) |
| C(86) | 6491(1) | 1568(1) | 9114(1)  | 38(1) |
| C(87) | 5720(1) | 1494(1) | 8748(1)  | 33(1) |
| P(4)  | 4568(1) | 8661(1) | 9798(1)  | 20(1) |
| O(4)  | 4827(1) | 7984(1) | 9934(1)  | 24(1) |
| N(4)  | 5108(1) | 9158(1) | 9741(1)  | 21(1) |
| C(88) | 4446(1) | 9027(1) | 10443(1) | 23(1) |
| C(89) | 4998(1) | 9302(1) | 10996(1) | 28(1) |
| C(90) | 4917(1) | 9544(1) | 11516(1) | 34(1) |
| C(91) | 4294(1) | 9514(1) | 11486(1) | 37(1) |
| C(92) | 3741(1) | 9247(1) | 10936(1) | 35(1) |
| C(93) | 3819(1) | 9007(1) | 10422(1) | 28(1) |

|        |          |         |          |       |
|--------|----------|---------|----------|-------|
| C(94)  | 3755(1)  | 8693(1) | 9056(1)  | 21(1) |
| C(95)  | 3413(1)  | 9279(1) | 8830(1)  | 28(1) |
| C(96)  | 2798(1)  | 9301(1) | 8256(1)  | 34(1) |
| C(97)  | 2519(1)  | 8744(1) | 7893(1)  | 39(1) |
| C(98)  | 2858(1)  | 8158(1) | 8112(1)  | 41(1) |
| C(99)  | 3472(1)  | 8131(1) | 8687(1)  | 29(1) |
| C(100) | 5451(1)  | 8937(1) | 9372(1)  | 21(1) |
| C(101) | 4997(1)  | 8986(1) | 8622(1)  | 27(1) |
| C(102) | 4581(1)  | 9519(1) | 8330(1)  | 30(1) |
| C(103) | 4187(1)  | 9564(1) | 7644(1)  | 44(1) |
| C(104) | 4191(1)  | 9069(2) | 7244(1)  | 55(1) |
| C(105) | 4593(1)  | 8535(2) | 7526(1)  | 55(1) |
| C(106) | 4989(1)  | 8486(1) | 8214(1)  | 40(1) |
| C(107) | 6147(1)  | 9296(1) | 9618(1)  | 21(1) |
| C(108) | 6027(1)  | 9982(1) | 9352(1)  | 27(1) |
| C(109) | 6539(1)  | 8902(1) | 9364(1)  | 24(1) |
| C(110) | 6687(1)  | 9044(1) | 8897(1)  | 41(1) |
| C(111) | 6541(1)  | 9322(1) | 10396(1) | 20(1) |
| C(112) | 7243(1)  | 9636(1) | 10657(1) | 24(1) |
| C(113) | 7614(1)  | 9695(1) | 11416(1) | 28(1) |
| C(114) | 7689(1)  | 9037(1) | 11741(1) | 29(1) |
| C(115) | 6995(1)  | 8733(1) | 11495(1) | 28(1) |
| C(116) | 6618(1)  | 8668(1) | 10735(1) | 24(1) |
| P(5)   | 9858(1)  | 1825(1) | 4923(1)  | 19(1) |
| O(5)   | 9798(1)  | 1153(1) | 5125(1)  | 23(1) |
| N(5)   | 9598(1)  | 2369(1) | 5267(1)  | 20(1) |
| C(117) | 9393(1)  | 1912(1) | 4033(1)  | 22(1) |
| C(118) | 9191(1)  | 1356(1) | 3637(1)  | 30(1) |
| C(119) | 8839(1)  | 1414(1) | 2952(1)  | 34(1) |
| C(120) | 8685(1)  | 2014(1) | 2656(1)  | 35(1) |
| C(121) | 8884(1)  | 2565(1) | 3046(1)  | 33(1) |
| C(122) | 9234(1)  | 2517(1) | 3732(1)  | 25(1) |
| C(123) | 10723(1) | 2028(1) | 5154(1)  | 24(1) |
| C(124) | 10965(1) | 1995(1) | 4703(1)  | 38(1) |
| C(125) | 11641(1) | 2093(2) | 4909(2)  | 52(1) |
| C(126) | 12088(1) | 2225(1) | 5570(2)  | 49(1) |



|        |          |          |         |       |
|--------|----------|----------|---------|-------|
| C(127) | 11858(1) | 2251(1)  | 6025(1) | 45(1) |
| C(128) | 11182(1) | 2160(1)  | 5823(1) | 35(1) |
| C(129) | 9313(1)  | 2191(1)  | 5696(1) | 22(1) |
| C(130) | 9818(1)  | 2313(1)  | 6423(1) | 22(1) |
| C(131) | 10225(1) | 2861(1)  | 6633(1) | 27(1) |
| C(132) | 10673(1) | 2958(1)  | 7305(1) | 32(1) |
| C(133) | 10720(1) | 2515(1)  | 7771(1) | 33(1) |
| C(134) | 10330(1) | 1962(1)  | 7567(1) | 38(1) |
| C(135) | 9883(1)  | 1862(1)  | 6896(1) | 31(1) |
| C(136) | 8602(1)  | 2510(1)  | 5474(1) | 24(1) |
| C(137) | 8687(1)  | 3235(1)  | 5649(1) | 32(1) |
| C(138) | 8288(1)  | 2147(1)  | 5828(1) | 34(1) |
| C(139) | 8046(1)  | 2394(2)  | 6199(1) | 55(1) |
| C(140) | 8138(1)  | 2433(1)  | 4701(1) | 27(1) |
| C(141) | 7435(1)  | 2738(1)  | 4444(1) | 42(1) |
| C(142) | 7014(1)  | 2696(1)  | 3693(1) | 53(1) |
| C(143) | 6932(1)  | 1999(1)  | 3445(1) | 46(1) |
| C(144) | 7630(1)  | 1692(1)  | 3701(1) | 36(1) |
| C(145) | 8044(1)  | 1731(1)  | 4458(1) | 27(1) |
| P(6)   | 10247(1) | 9399(1)  | 4945(1) | 22(1) |
| O(6)   | 10179(1) | 8682(1)  | 4925(1) | 29(1) |
| N(6)   | 9641(1)  | 9746(1)  | 5041(1) | 22(1) |
| C(146) | 10146(1) | 9732(1)  | 4177(1) | 23(1) |
| C(147) | 9535(1)  | 9616(1)  | 3602(1) | 28(1) |
| C(148) | 9441(1)  | 9818(1)  | 2992(1) | 31(1) |
| C(149) | 9949(1)  | 10144(1) | 2943(1) | 36(1) |
| C(150) | 10554(1) | 10274(1) | 3507(1) | 42(1) |
| C(151) | 10656(1) | 10060(1) | 4123(1) | 36(1) |
| C(152) | 11079(1) | 9646(1)  | 5571(1) | 25(1) |
| C(153) | 11582(1) | 9185(1)  | 5907(1) | 36(1) |
| C(154) | 12230(1) | 9383(1)  | 6365(1) | 52(1) |
| C(155) | 12377(1) | 10026(2) | 6487(2) | 57(1) |
| C(156) | 11882(1) | 10489(1) | 6163(1) | 44(1) |
| C(157) | 11230(1) | 10301(1) | 5709(1) | 31(1) |
| C(158) | 9414(1)  | 9418(1)  | 5466(1) | 24(1) |
| C(159) | 9920(1)  | 9494(1)  | 6208(1) | 26(1) |

|        |          |          |         |       |
|--------|----------|----------|---------|-------|
| C(160) | 10271(1) | 10067(1) | 6469(1) | 28(1) |
| C(161) | 10730(1) | 10111(1) | 7145(1) | 37(1) |
| C(162) | 10846(1) | 9586(2)  | 7556(1) | 45(1) |
| C(163) | 10504(1) | 9018(1)  | 7298(1) | 42(1) |
| C(164) | 10048(1) | 8969(1)  | 6629(1) | 35(1) |
| C(165) | 8677(1)  | 9610(1)  | 5285(1) | 26(1) |
| C(166) | 8676(1)  | 10292(1) | 5541(1) | 27(1) |
| C(167) | 8441(1)  | 9118(1)  | 5615(1) | 37(1) |
| C(168) | 8250(2)  | 9221(2)  | 6059(1) | 54(1) |
| C(169) | 8204(1)  | 9591(1)  | 4514(1) | 32(1) |
| C(170) | 7464(1)  | 9752(2)  | 4306(1) | 48(1) |
| C(171) | 7007(1)  | 9763(2)  | 3548(1) | 58(1) |
| C(172) | 7051(2)  | 9122(2)  | 3243(1) | 62(1) |
| C(173) | 7784(2)  | 8976(2)  | 3440(1) | 51(1) |
| C(174) | 8227(1)  | 8956(1)  | 4188(1) | 41(1) |

**Table 3. Bond lengths [ $\text{\AA}$ ] and angles [ $^\circ$ ] for  $\text{C}_{29}\text{H}_{34}\text{NOP}$  (13)**

|            |            |
|------------|------------|
| P(1)-O(1)  | 1.4897(13) |
| P(1)-N(1)  | 1.6401(16) |
| P(1)-C(1)  | 1.7961(19) |
| P(1)-C(7)  | 1.8040(19) |
| N(1)-C(13) | 1.472(2)   |
| N(1)-H(1N) | 0.8800     |
| C(1)-C(2)  | 1.386(3)   |
| C(1)-C(6)  | 1.397(3)   |
| C(2)-C(3)  | 1.386(3)   |
| C(2)-H(2A) | 0.9500     |
| C(3)-C(4)  | 1.372(3)   |
| C(3)-H(3A) | 0.9500     |
| C(4)-C(5)  | 1.391(3)   |
| C(4)-H(4A) | 0.9500     |
| C(5)-C(6)  | 1.387(3)   |
| C(5)-H(5A) | 0.9500     |

|              |          |
|--------------|----------|
| C(6)-H(6A)   | 0.9500   |
| C(7)-C(8)    | 1.394(3) |
| C(7)-C(12)   | 1.400(3) |
| C(8)-C(9)    | 1.390(3) |
| C(8)-H(8A)   | 0.9500   |
| C(9)-C(10)   | 1.374(3) |
| C(9)-H(9A)   | 0.9500   |
| C(10)-C(11)  | 1.392(3) |
| C(10)-H(10A) | 0.9500   |
| C(11)-C(12)  | 1.377(3) |
| C(11)-H(11A) | 0.9500   |
| C(12)-H(12A) | 0.9500   |
| C(13)-C(14)  | 1.526(3) |
| C(13)-C(20)  | 1.571(3) |
| C(13)-H(13A) | 1.0000   |
| C(14)-C(15)  | 1.392(3) |
| C(14)-C(19)  | 1.392(3) |
| C(15)-C(16)  | 1.384(3) |
| C(15)-H(15A) | 0.9500   |
| C(16)-C(17)  | 1.379(3) |
| C(16)-H(16A) | 0.9500   |
| C(17)-C(18)  | 1.382(3) |
| C(17)-H(17A) | 0.9500   |
| C(18)-C(19)  | 1.390(3) |
| C(18)-H(18A) | 0.9500   |
| C(19)-H(19A) | 0.9500   |
| C(20)-C(22)  | 1.516(3) |
| C(20)-C(21)  | 1.529(3) |
| C(20)-C(24)  | 1.572(3) |
| C(21)-H(21A) | 0.9800   |
| C(21)-H(21B) | 0.9800   |
| C(21)-H(21C) | 0.9800   |
| C(22)-C(23)  | 1.325(3) |
| C(22)-H(22A) | 0.9500   |
| C(23)-H(23A) | 0.9500   |
| C(23)-H(23B) | 0.9500   |

|              |            |
|--------------|------------|
| C(24)-C(29)  | 1.541(3)   |
| C(24)-C(25)  | 1.542(3)   |
| C(24)-H(24A) | 1.0000     |
| C(25)-C(26)  | 1.524(4)   |
| C(25)-H(25A) | 0.9900     |
| C(25)-H(25B) | 0.9900     |
| C(26)-C(27)  | 1.515(4)   |
| C(26)-H(26A) | 0.9900     |
| C(26)-H(26B) | 0.9900     |
| C(27)-C(28)  | 1.527(4)   |
| C(27)-H(27A) | 0.9900     |
| C(27)-H(27B) | 0.9900     |
| C(28)-C(29)  | 1.537(3)   |
| C(28)-H(28A) | 0.9900     |
| C(28)-H(28B) | 0.9900     |
| C(29)-H(29A) | 0.9900     |
| C(29)-H(29B) | 0.9900     |
| P(2)-O(2)    | 1.4899(14) |
| P(2)-N(2)    | 1.6415(17) |
| P(2)-C(30)   | 1.804(2)   |
| P(2)-C(36)   | 1.8048(19) |
| N(2)-C(42)   | 1.467(2)   |
| N(2)-H(2N)   | 0.8800     |
| C(30)-C(31)  | 1.382(3)   |
| C(30)-C(35)  | 1.404(3)   |
| C(31)-C(32)  | 1.372(3)   |
| C(31)-H(31A) | 0.9500     |
| C(32)-C(33)  | 1.381(4)   |
| C(32)-H(32A) | 0.9500     |
| C(33)-C(34)  | 1.368(5)   |
| C(33)-H(33A) | 0.9500     |
| C(34)-C(35)  | 1.387(4)   |
| C(34)-H(34A) | 0.9500     |
| C(35)-H(35A) | 0.9500     |
| C(36)-C(37)  | 1.386(3)   |
| C(36)-C(41)  | 1.393(3)   |

|              |          |
|--------------|----------|
| C(37)-C(38)  | 1.387(3) |
| C(37)-H(37A) | 0.9500   |
| C(38)-C(39)  | 1.376(3) |
| C(38)-H(38A) | 0.9500   |
| C(39)-C(40)  | 1.377(3) |
| C(39)-H(39A) | 0.9500   |
| C(40)-C(41)  | 1.385(3) |
| C(40)-H(40A) | 0.9500   |
| C(41)-H(41A) | 0.9500   |
| C(42)-C(43)  | 1.529(3) |
| C(42)-C(49)  | 1.564(3) |
| C(42)-H(42A) | 1.0000   |
| C(43)-C(48)  | 1.387(3) |
| C(43)-C(44)  | 1.389(3) |
| C(44)-C(45)  | 1.383(3) |
| C(44)-H(44A) | 0.9500   |
| C(45)-C(46)  | 1.377(4) |
| C(45)-H(45A) | 0.9500   |
| C(46)-C(47)  | 1.386(4) |
| C(46)-H(46A) | 0.9500   |
| C(47)-C(48)  | 1.388(3) |
| C(47)-H(47A) | 0.9500   |
| C(48)-H(48A) | 0.9500   |
| C(49)-C(51)  | 1.505(3) |
| C(49)-C(50)  | 1.529(3) |
| C(49)-C(53)  | 1.570(3) |
| C(50)-H(50A) | 0.9800   |
| C(50)-H(50B) | 0.9800   |
| C(50)-H(50C) | 0.9800   |
| C(51)-C(52)  | 1.328(3) |
| C(51)-H(51A) | 0.9500   |
| C(52)-H(52A) | 0.9500   |
| C(52)-H(52B) | 0.9500   |
| C(53)-C(54)  | 1.535(3) |
| C(53)-C(58)  | 1.540(3) |
| C(53)-H(53A) | 1.0000   |

|              |            |
|--------------|------------|
| C(54)-C(55)  | 1.528(3)   |
| C(54)-H(54A) | 0.9900     |
| C(54)-H(54B) | 0.9900     |
| C(55)-C(56)  | 1.522(3)   |
| C(55)-H(55A) | 0.9900     |
| C(55)-H(55B) | 0.9900     |
| C(56)-C(57)  | 1.530(3)   |
| C(56)-H(56A) | 0.9900     |
| C(56)-H(56B) | 0.9900     |
| C(57)-C(58)  | 1.525(3)   |
| C(57)-H(57A) | 0.9900     |
| C(57)-H(57B) | 0.9900     |
| C(58)-H(58A) | 0.9900     |
| C(58)-H(58B) | 0.9900     |
| P(3)-O(3)    | 1.4903(14) |
| P(3)-N(3)    | 1.6441(16) |
| P(3)-C(59)   | 1.8039(19) |
| P(3)-C(65)   | 1.807(2)   |
| N(3)-C(71)   | 1.476(2)   |
| N(3)-H(3N)   | 0.8800     |
| C(59)-C(60)  | 1.385(3)   |
| C(59)-C(64)  | 1.397(3)   |
| C(60)-C(61)  | 1.393(3)   |
| C(60)-H(60A) | 0.9500     |
| C(61)-C(62)  | 1.376(3)   |
| C(61)-H(61A) | 0.9500     |
| C(62)-C(63)  | 1.370(3)   |
| C(62)-H(62A) | 0.9500     |
| C(63)-C(64)  | 1.380(3)   |
| C(63)-H(63A) | 0.9500     |
| C(64)-H(64A) | 0.9500     |
| C(65)-C(66)  | 1.385(3)   |
| C(65)-C(70)  | 1.400(3)   |
| C(66)-C(67)  | 1.388(3)   |
| C(66)-H(66A) | 0.9500     |
| C(67)-C(68)  | 1.381(3)   |

|              |          |
|--------------|----------|
| C(67)-H(67A) | 0.9500   |
| C(68)-C(69)  | 1.394(3) |
| C(68)-H(68A) | 0.9500   |
| C(69)-C(70)  | 1.376(3) |
| C(69)-H(69A) | 0.9500   |
| C(70)-H(70A) | 0.9500   |
| C(71)-C(72)  | 1.531(3) |
| C(71)-C(78)  | 1.569(3) |
| C(71)-H(71A) | 1.0000   |
| C(72)-C(77)  | 1.368(3) |
| C(72)-C(73)  | 1.395(3) |
| C(73)-C(74)  | 1.381(3) |
| C(73)-H(73A) | 0.9500   |
| C(74)-C(75)  | 1.394(3) |
| C(74)-H(74A) | 0.9500   |
| C(75)-C(76)  | 1.373(3) |
| C(75)-H(75A) | 0.9500   |
| C(76)-C(77)  | 1.398(3) |
| C(76)-H(76A) | 0.9500   |
| C(77)-H(77A) | 0.9500   |
| C(78)-C(80)  | 1.513(3) |
| C(78)-C(79)  | 1.514(3) |
| C(78)-C(82)  | 1.580(3) |
| C(79)-H(79A) | 0.9800   |
| C(79)-H(79B) | 0.9800   |
| C(79)-H(79C) | 0.9800   |
| C(80)-C(81)  | 1.303(3) |
| C(80)-H(80A) | 0.9500   |
| C(81)-H(81A) | 0.9500   |
| C(81)-H(81B) | 0.9500   |
| C(82)-C(87)  | 1.525(3) |
| C(82)-C(83)  | 1.536(3) |
| C(82)-H(82A) | 1.0000   |
| C(83)-C(84)  | 1.517(3) |
| C(83)-H(83A) | 0.9900   |
| C(83)-H(83B) | 0.9900   |

|              |            |
|--------------|------------|
| C(84)-C(85)  | 1.518(3)   |
| C(84)-H(84A) | 0.9900     |
| C(84)-H(84B) | 0.9900     |
| C(85)-C(86)  | 1.517(3)   |
| C(85)-H(85A) | 0.9900     |
| C(85)-H(85B) | 0.9900     |
| C(86)-C(87)  | 1.527(3)   |
| C(86)-H(86A) | 0.9900     |
| C(86)-H(86B) | 0.9900     |
| C(87)-H(87A) | 0.9900     |
| C(87)-H(87B) | 0.9900     |
| P(4)-O(4)    | 1.4894(14) |
| P(4)-N(4)    | 1.6464(16) |
| P(4)-C(94)   | 1.8016(19) |
| P(4)-C(88)   | 1.804(2)   |
| N(4)-C(100)  | 1.474(2)   |
| N(4)-H(4N)   | 0.8800     |
| C(88)-C(93)  | 1.391(3)   |
| C(88)-C(89)  | 1.398(3)   |
| C(89)-C(90)  | 1.389(3)   |
| C(89)-H(89A) | 0.9500     |
| C(90)-C(91)  | 1.376(3)   |
| C(90)-H(90A) | 0.9500     |
| C(91)-C(92)  | 1.389(3)   |
| C(91)-H(91A) | 0.9500     |
| C(92)-C(93)  | 1.374(3)   |
| C(92)-H(92A) | 0.9500     |
| C(93)-H(93A) | 0.9500     |
| C(94)-C(95)  | 1.391(3)   |
| C(94)-C(99)  | 1.398(3)   |
| C(95)-C(96)  | 1.376(3)   |
| C(95)-H(95A) | 0.9500     |
| C(96)-C(97)  | 1.381(4)   |
| C(96)-H(96A) | 0.9500     |
| C(97)-C(98)  | 1.389(4)   |
| C(97)-H(97A) | 0.9500     |



|               |          |
|---------------|----------|
| C(98)-C(99)   | 1.376(3) |
| C(98)-H(98A)  | 0.9500   |
| C(99)-H(99A)  | 0.9500   |
| C(100)-C(101) | 1.523(3) |
| C(100)-C(107) | 1.573(3) |
| C(100)-H(10B) | 1.0000   |
| C(101)-C(102) | 1.389(3) |
| C(101)-C(106) | 1.391(3) |
| C(102)-C(103) | 1.388(3) |
| C(102)-H(10C) | 0.9500   |
| C(103)-C(104) | 1.378(4) |
| C(103)-H(10D) | 0.9500   |
| C(104)-C(105) | 1.375(4) |
| C(104)-H(10E) | 0.9500   |
| C(105)-C(106) | 1.394(3) |
| C(105)-H(10F) | 0.9500   |
| C(106)-H(10G) | 0.9500   |
| C(107)-C(109) | 1.513(3) |
| C(107)-C(108) | 1.514(3) |
| C(107)-C(111) | 1.568(3) |
| C(108)-H(10H) | 0.9800   |
| C(108)-H(10I) | 0.9800   |
| C(108)-H(10J) | 0.9800   |
| C(109)-C(110) | 1.305(3) |
| C(109)-H(10K) | 0.9500   |
| C(110)-H(11B) | 0.9500   |
| C(110)-H(11C) | 0.9500   |
| C(111)-C(116) | 1.528(3) |
| C(111)-C(112) | 1.539(3) |
| C(111)-H(11E) | 1.0000   |
| C(112)-C(113) | 1.532(3) |
| C(112)-H(11F) | 0.9900   |
| C(112)-H(11G) | 0.9900   |
| C(113)-C(114) | 1.522(3) |
| C(113)-H(11H) | 0.9900   |
| C(113)-H(11I) | 0.9900   |

|               |            |
|---------------|------------|
| C(114)-C(115) | 1.519(3)   |
| C(114)-H(11J) | 0.9900     |
| C(114)-H(11K) | 0.9900     |
| C(115)-C(116) | 1.536(3)   |
| C(115)-H(11L) | 0.9900     |
| C(115)-H(11M) | 0.9900     |
| C(116)-H(11N) | 0.9900     |
| C(116)-H(11O) | 0.9900     |
| P(5)-O(5)     | 1.4915(14) |
| P(5)-N(5)     | 1.6398(16) |
| P(5)-C(117)   | 1.8002(19) |
| P(5)-C(123)   | 1.805(2)   |
| N(5)-C(129)   | 1.463(2)   |
| N(5)-H(5N)    | 0.8800     |
| C(117)-C(122) | 1.389(3)   |
| C(117)-C(118) | 1.398(3)   |
| C(118)-C(119) | 1.384(3)   |
| C(118)-H(11P) | 0.9500     |
| C(119)-C(120) | 1.376(3)   |
| C(119)-H(11Q) | 0.9500     |
| C(120)-C(121) | 1.382(3)   |
| C(120)-H(12B) | 0.9500     |
| C(121)-C(122) | 1.383(3)   |
| C(121)-H(12C) | 0.9500     |
| C(122)-H(12D) | 0.9500     |
| C(123)-C(124) | 1.391(3)   |
| C(123)-C(128) | 1.403(3)   |
| C(124)-C(125) | 1.375(3)   |
| C(124)-H(12E) | 0.9500     |
| C(125)-C(126) | 1.385(4)   |
| C(125)-H(12F) | 0.9500     |
| C(126)-C(127) | 1.379(4)   |
| C(126)-H(12G) | 0.9500     |
| C(127)-C(128) | 1.374(3)   |
| C(127)-H(12H) | 0.9500     |
| C(128)-H(12I) | 0.9500     |

|               |          |
|---------------|----------|
| C(129)-C(130) | 1.521(3) |
| C(129)-C(136) | 1.574(3) |
| C(129)-H(12J) | 1.0000   |
| C(130)-C(135) | 1.386(3) |
| C(130)-C(131) | 1.390(3) |
| C(131)-C(132) | 1.391(3) |
| C(131)-H(13B) | 0.9500   |
| C(132)-C(133) | 1.375(3) |
| C(132)-H(13C) | 0.9500   |
| C(133)-C(134) | 1.378(4) |
| C(133)-H(13D) | 0.9500   |
| C(134)-C(135) | 1.391(3) |
| C(134)-H(13E) | 0.9500   |
| C(135)-H(13F) | 0.9500   |
| C(136)-C(138) | 1.515(3) |
| C(136)-C(137) | 1.538(3) |
| C(136)-C(140) | 1.575(3) |
| C(137)-H(13G) | 0.9800   |
| C(137)-H(13H) | 0.9800   |
| C(137)-H(13I) | 0.9800   |
| C(138)-C(139) | 1.321(4) |
| C(138)-H(13J) | 0.9500   |
| C(139)-H(13K) | 0.9500   |
| C(139)-H(13L) | 0.9500   |
| C(140)-C(145) | 1.532(3) |
| C(140)-C(141) | 1.534(3) |
| C(140)-H(14A) | 1.0000   |
| C(141)-C(142) | 1.519(3) |
| C(141)-H(14B) | 0.9900   |
| C(141)-H(14C) | 0.9900   |
| C(142)-C(143) | 1.528(4) |
| C(142)-H(14D) | 0.9900   |
| C(142)-H(14E) | 0.9900   |
| C(143)-C(144) | 1.526(3) |
| C(143)-H(14F) | 0.9900   |
| C(143)-H(14G) | 0.9900   |

|               |            |
|---------------|------------|
| C(144)-C(145) | 1.529(3)   |
| C(144)-H(14H) | 0.9900     |
| C(144)-H(14I) | 0.9900     |
| C(145)-H(14J) | 0.9900     |
| C(145)-H(14K) | 0.9900     |
| P(6)-O(6)     | 1.4880(15) |
| P(6)-N(6)     | 1.6515(17) |
| P(6)-C(152)   | 1.798(2)   |
| P(6)-C(146)   | 1.806(2)   |
| N(6)-C(158)   | 1.472(2)   |
| N(6)-H(6N)    | 0.8800     |
| C(146)-C(151) | 1.392(3)   |
| C(146)-C(147) | 1.393(3)   |
| C(147)-C(148) | 1.380(3)   |
| C(147)-H(14L) | 0.9500     |
| C(148)-C(149) | 1.381(3)   |
| C(148)-H(14M) | 0.9500     |
| C(149)-C(150) | 1.378(3)   |
| C(149)-H(14N) | 0.9500     |
| C(150)-C(151) | 1.396(3)   |
| C(150)-H(15B) | 0.9500     |
| C(151)-H(15C) | 0.9500     |
| C(152)-C(153) | 1.392(3)   |
| C(152)-C(157) | 1.395(3)   |
| C(153)-C(154) | 1.386(4)   |
| C(153)-H(15D) | 0.9500     |
| C(154)-C(155) | 1.366(4)   |
| C(154)-H(15E) | 0.9500     |
| C(155)-C(156) | 1.382(4)   |
| C(155)-H(15F) | 0.9500     |
| C(156)-C(157) | 1.383(3)   |
| C(156)-H(15G) | 0.9500     |
| C(157)-H(15H) | 0.9500     |
| C(158)-C(159) | 1.534(3)   |
| C(158)-C(165) | 1.558(3)   |
| C(158)-H(15I) | 1.0000     |

|               |          |
|---------------|----------|
| C(159)-C(164) | 1.388(3) |
| C(159)-C(160) | 1.389(3) |
| C(160)-C(161) | 1.392(3) |
| C(160)-H(16B) | 0.9500   |
| C(161)-C(162) | 1.380(4) |
| C(161)-H(16C) | 0.9500   |
| C(162)-C(163) | 1.371(4) |
| C(162)-H(16D) | 0.9500   |
| C(163)-C(164) | 1.379(3) |
| C(163)-H(16E) | 0.9500   |
| C(164)-H(16F) | 0.9500   |
| C(165)-C(167) | 1.512(3) |
| C(165)-C(166) | 1.526(3) |
| C(165)-C(169) | 1.567(3) |
| C(166)-H(16G) | 0.9800   |
| C(166)-H(16H) | 0.9800   |
| C(166)-H(16I) | 0.9800   |
| C(167)-C(168) | 1.306(4) |
| C(167)-H(16J) | 0.9500   |
| C(168)-H(16K) | 0.9500   |
| C(168)-H(16L) | 0.9500   |
| C(169)-C(174) | 1.526(3) |
| C(169)-C(170) | 1.534(3) |
| C(169)-H(16N) | 1.0000   |
| C(170)-C(171) | 1.536(4) |
| C(170)-H(17B) | 0.9900   |
| C(170)-H(17C) | 0.9900   |
| C(171)-C(172) | 1.526(5) |
| C(171)-H(17D) | 0.9900   |
| C(171)-H(17E) | 0.9900   |
| C(172)-C(173) | 1.517(4) |
| C(172)-H(17F) | 0.9900   |
| C(172)-H(17G) | 0.9900   |
| C(173)-C(174) | 1.514(3) |
| C(173)-H(17H) | 0.9900   |
| C(173)-H(17I) | 0.9900   |

|                  |            |
|------------------|------------|
| C(174)-H(17J)    | 0.9900     |
| C(174)-H(17K)    | 0.9900     |
| O(1)-P(1)-N(1)   | 111.29(8)  |
| O(1)-P(1)-C(1)   | 111.77(9)  |
| N(1)-P(1)-C(1)   | 108.90(9)  |
| O(1)-P(1)-C(7)   | 110.71(8)  |
| N(1)-P(1)-C(7)   | 108.61(8)  |
| C(1)-P(1)-C(7)   | 105.33(9)  |
| C(13)-N(1)-P(1)  | 121.44(13) |
| C(13)-N(1)-H(1N) | 119.3      |
| P(1)-N(1)-H(1N)  | 119.3      |
| C(2)-C(1)-C(6)   | 119.69(18) |
| C(2)-C(1)-P(1)   | 119.25(16) |
| C(6)-C(1)-P(1)   | 121.02(15) |
| C(3)-C(2)-C(1)   | 120.0(2)   |
| C(3)-C(2)-H(2A)  | 120.0      |
| C(1)-C(2)-H(2A)  | 120.0      |
| C(4)-C(3)-C(2)   | 120.4(2)   |
| C(4)-C(3)-H(3A)  | 119.8      |
| C(2)-C(3)-H(3A)  | 119.8      |
| C(3)-C(4)-C(5)   | 120.2(2)   |
| C(3)-C(4)-H(4A)  | 119.9      |
| C(5)-C(4)-H(4A)  | 119.9      |
| C(6)-C(5)-C(4)   | 119.9(2)   |
| C(6)-C(5)-H(5A)  | 120.1      |
| C(4)-C(5)-H(5A)  | 120.1      |
| C(5)-C(6)-C(1)   | 119.80(19) |
| C(5)-C(6)-H(6A)  | 120.1      |
| C(1)-C(6)-H(6A)  | 120.1      |
| C(8)-C(7)-C(12)  | 118.51(18) |
| C(8)-C(7)-P(1)   | 122.49(15) |
| C(12)-C(7)-P(1)  | 118.41(15) |
| C(9)-C(8)-C(7)   | 120.74(19) |
| C(9)-C(8)-H(8A)  | 119.6      |
| C(7)-C(8)-H(8A)  | 119.6      |
| C(10)-C(9)-C(8)  | 119.85(19) |

|                    |            |
|--------------------|------------|
| C(10)-C(9)-H(9A)   | 120.1      |
| C(8)-C(9)-H(9A)    | 120.1      |
| C(9)-C(10)-C(11)   | 120.2(2)   |
| C(9)-C(10)-H(10A)  | 119.9      |
| C(11)-C(10)-H(10A) | 119.9      |
| C(12)-C(11)-C(10)  | 120.10(19) |
| C(12)-C(11)-H(11A) | 119.9      |
| C(10)-C(11)-H(11A) | 119.9      |
| C(11)-C(12)-C(7)   | 120.58(18) |
| C(11)-C(12)-H(12A) | 119.7      |
| C(7)-C(12)-H(12A)  | 119.7      |
| N(1)-C(13)-C(14)   | 110.40(15) |
| N(1)-C(13)-C(20)   | 113.24(15) |
| C(14)-C(13)-C(20)  | 114.06(15) |
| N(1)-C(13)-H(13A)  | 106.2      |
| C(14)-C(13)-H(13A) | 106.2      |
| C(20)-C(13)-H(13A) | 106.2      |
| C(15)-C(14)-C(19)  | 118.30(19) |
| C(15)-C(14)-C(13)  | 122.41(18) |
| C(19)-C(14)-C(13)  | 119.21(17) |
| C(16)-C(15)-C(14)  | 120.7(2)   |
| C(16)-C(15)-H(15A) | 119.7      |
| C(14)-C(15)-H(15A) | 119.7      |
| C(17)-C(16)-C(15)  | 120.6(2)   |
| C(17)-C(16)-H(16A) | 119.7      |
| C(15)-C(16)-H(16A) | 119.7      |
| C(16)-C(17)-C(18)  | 119.4(2)   |
| C(16)-C(17)-H(17A) | 120.3      |
| C(18)-C(17)-H(17A) | 120.3      |
| C(17)-C(18)-C(19)  | 120.1(2)   |
| C(17)-C(18)-H(18A) | 119.9      |
| C(19)-C(18)-H(18A) | 119.9      |
| C(18)-C(19)-C(14)  | 120.8(2)   |
| C(18)-C(19)-H(19A) | 119.6      |
| C(14)-C(19)-H(19A) | 119.6      |
| C(22)-C(20)-C(21)  | 111.77(17) |

|                     |            |
|---------------------|------------|
| C(22)-C(20)-C(13)   | 106.16(16) |
| C(21)-C(20)-C(13)   | 110.65(16) |
| C(22)-C(20)-C(24)   | 109.85(16) |
| C(21)-C(20)-C(24)   | 109.70(16) |
| C(13)-C(20)-C(24)   | 108.63(16) |
| C(20)-C(21)-H(21A)  | 109.5      |
| C(20)-C(21)-H(21B)  | 109.5      |
| H(21A)-C(21)-H(21B) | 109.5      |
| C(20)-C(21)-H(21C)  | 109.5      |
| H(21A)-C(21)-H(21C) | 109.5      |
| H(21B)-C(21)-H(21C) | 109.5      |
| C(23)-C(22)-C(20)   | 127.0(2)   |
| C(23)-C(22)-H(22A)  | 116.5      |
| C(20)-C(22)-H(22A)  | 116.5      |
| C(22)-C(23)-H(23A)  | 120.0      |
| C(22)-C(23)-H(23B)  | 120.0      |
| H(23A)-C(23)-H(23B) | 120.0      |
| C(29)-C(24)-C(25)   | 108.45(18) |
| C(29)-C(24)-C(20)   | 114.43(17) |
| C(25)-C(24)-C(20)   | 112.66(18) |
| C(29)-C(24)-H(24A)  | 107.0      |
| C(25)-C(24)-H(24A)  | 107.0      |
| C(20)-C(24)-H(24A)  | 107.0      |
| C(26)-C(25)-C(24)   | 111.9(2)   |
| C(26)-C(25)-H(25A)  | 109.2      |
| C(24)-C(25)-H(25A)  | 109.2      |
| C(26)-C(25)-H(25B)  | 109.2      |
| C(24)-C(25)-H(25B)  | 109.2      |
| H(25A)-C(25)-H(25B) | 107.9      |
| C(27)-C(26)-C(25)   | 112.4(2)   |
| C(27)-C(26)-H(26A)  | 109.1      |
| C(25)-C(26)-H(26A)  | 109.1      |
| C(27)-C(26)-H(26B)  | 109.1      |
| C(25)-C(26)-H(26B)  | 109.1      |
| H(26A)-C(26)-H(26B) | 107.9      |
| C(26)-C(27)-C(28)   | 110.3(2)   |



|                     |            |
|---------------------|------------|
| C(26)-C(27)-H(27A)  | 109.6      |
| C(28)-C(27)-H(27A)  | 109.6      |
| C(26)-C(27)-H(27B)  | 109.6      |
| C(28)-C(27)-H(27B)  | 109.6      |
| H(27A)-C(27)-H(27B) | 108.1      |
| C(27)-C(28)-C(29)   | 110.9(2)   |
| C(27)-C(28)-H(28A)  | 109.5      |
| C(29)-C(28)-H(28A)  | 109.5      |
| C(27)-C(28)-H(28B)  | 109.5      |
| C(29)-C(28)-H(28B)  | 109.5      |
| H(28A)-C(28)-H(28B) | 108.0      |
| C(28)-C(29)-C(24)   | 111.82(18) |
| C(28)-C(29)-H(29A)  | 109.3      |
| C(24)-C(29)-H(29A)  | 109.3      |
| C(28)-C(29)-H(29B)  | 109.3      |
| C(24)-C(29)-H(29B)  | 109.3      |
| H(29A)-C(29)-H(29B) | 107.9      |
| O(2)-P(2)-N(2)      | 111.27(8)  |
| O(2)-P(2)-C(30)     | 111.24(9)  |
| N(2)-P(2)-C(30)     | 111.14(9)  |
| O(2)-P(2)-C(36)     | 112.89(8)  |
| N(2)-P(2)-C(36)     | 103.32(9)  |
| C(30)-P(2)-C(36)    | 106.65(9)  |
| C(42)-N(2)-P(2)     | 119.67(13) |
| C(42)-N(2)-H(2N)    | 120.2      |
| P(2)-N(2)-H(2N)     | 120.2      |
| C(31)-C(30)-C(35)   | 119.2(2)   |
| C(31)-C(30)-P(2)    | 122.37(16) |
| C(35)-C(30)-P(2)    | 118.43(18) |
| C(32)-C(31)-C(30)   | 121.1(2)   |
| C(32)-C(31)-H(31A)  | 119.4      |
| C(30)-C(31)-H(31A)  | 119.4      |
| C(31)-C(32)-C(33)   | 119.6(3)   |
| C(31)-C(32)-H(32A)  | 120.2      |
| C(33)-C(32)-H(32A)  | 120.2      |
| C(34)-C(33)-C(32)   | 120.3(3)   |

|                    |            |
|--------------------|------------|
| C(34)-C(33)-H(33A) | 119.9      |
| C(32)-C(33)-H(33A) | 119.9      |
| C(33)-C(34)-C(35)  | 120.9(3)   |
| C(33)-C(34)-H(34A) | 119.6      |
| C(35)-C(34)-H(34A) | 119.6      |
| C(34)-C(35)-C(30)  | 118.9(3)   |
| C(34)-C(35)-H(35A) | 120.6      |
| C(30)-C(35)-H(35A) | 120.6      |
| C(37)-C(36)-C(41)  | 118.90(18) |
| C(37)-C(36)-P(2)   | 125.82(15) |
| C(41)-C(36)-P(2)   | 115.28(15) |
| C(36)-C(37)-C(38)  | 120.3(2)   |
| C(36)-C(37)-H(37A) | 119.8      |
| C(38)-C(37)-H(37A) | 119.8      |
| C(39)-C(38)-C(37)  | 120.2(2)   |
| C(39)-C(38)-H(38A) | 119.9      |
| C(37)-C(38)-H(38A) | 119.9      |
| C(38)-C(39)-C(40)  | 120.21(19) |
| C(38)-C(39)-H(39A) | 119.9      |
| C(40)-C(39)-H(39A) | 119.9      |
| C(39)-C(40)-C(41)  | 119.8(2)   |
| C(39)-C(40)-H(40A) | 120.1      |
| C(41)-C(40)-H(40A) | 120.1      |
| C(40)-C(41)-C(36)  | 120.5(2)   |
| C(40)-C(41)-H(41A) | 119.7      |
| C(36)-C(41)-H(41A) | 119.7      |
| N(2)-C(42)-C(43)   | 111.80(16) |
| N(2)-C(42)-C(49)   | 110.85(15) |
| C(43)-C(42)-C(49)  | 114.71(15) |
| N(2)-C(42)-H(42A)  | 106.3      |
| C(43)-C(42)-H(42A) | 106.3      |
| C(49)-C(42)-H(42A) | 106.3      |
| C(48)-C(43)-C(44)  | 118.4(2)   |
| C(48)-C(43)-C(42)  | 121.72(18) |
| C(44)-C(43)-C(42)  | 119.75(19) |
| C(45)-C(44)-C(43)  | 121.2(2)   |

|                     |            |
|---------------------|------------|
| C(45)-C(44)-H(44A)  | 119.4      |
| C(43)-C(44)-H(44A)  | 119.4      |
| C(46)-C(45)-C(44)   | 120.0(2)   |
| C(46)-C(45)-H(45A)  | 120.0      |
| C(44)-C(45)-H(45A)  | 120.0      |
| C(45)-C(46)-C(47)   | 119.7(2)   |
| C(45)-C(46)-H(46A)  | 120.2      |
| C(47)-C(46)-H(46A)  | 120.2      |
| C(46)-C(47)-C(48)   | 120.2(2)   |
| C(46)-C(47)-H(47A)  | 119.9      |
| C(48)-C(47)-H(47A)  | 119.9      |
| C(43)-C(48)-C(47)   | 120.6(2)   |
| C(43)-C(48)-H(48A)  | 119.7      |
| C(47)-C(48)-H(48A)  | 119.7      |
| C(51)-C(49)-C(50)   | 111.47(16) |
| C(51)-C(49)-C(42)   | 107.72(16) |
| C(50)-C(49)-C(42)   | 109.28(15) |
| C(51)-C(49)-C(53)   | 108.81(16) |
| C(50)-C(49)-C(53)   | 109.77(15) |
| C(42)-C(49)-C(53)   | 109.75(15) |
| C(49)-C(50)-H(50A)  | 109.5      |
| C(49)-C(50)-H(50B)  | 109.5      |
| H(50A)-C(50)-H(50B) | 109.5      |
| C(49)-C(50)-H(50C)  | 109.5      |
| H(50A)-C(50)-H(50C) | 109.5      |
| H(50B)-C(50)-H(50C) | 109.5      |
| C(52)-C(51)-C(49)   | 126.7(2)   |
| C(52)-C(51)-H(51A)  | 116.7      |
| C(49)-C(51)-H(51A)  | 116.7      |
| C(51)-C(52)-H(52A)  | 120.0      |
| C(51)-C(52)-H(52B)  | 120.0      |
| H(52A)-C(52)-H(52B) | 120.0      |
| C(54)-C(53)-C(58)   | 109.03(17) |
| C(54)-C(53)-C(49)   | 112.18(16) |
| C(58)-C(53)-C(49)   | 113.92(16) |
| C(54)-C(53)-H(53A)  | 107.1      |

|                     |            |
|---------------------|------------|
| C(58)-C(53)-H(53A)  | 107.1      |
| C(49)-C(53)-H(53A)  | 107.1      |
| C(55)-C(54)-C(53)   | 111.85(19) |
| C(55)-C(54)-H(54A)  | 109.2      |
| C(53)-C(54)-H(54A)  | 109.2      |
| C(55)-C(54)-H(54B)  | 109.2      |
| C(53)-C(54)-H(54B)  | 109.2      |
| H(54A)-C(54)-H(54B) | 107.9      |
| C(56)-C(55)-C(54)   | 111.6(2)   |
| C(56)-C(55)-H(55A)  | 109.3      |
| C(54)-C(55)-H(55A)  | 109.3      |
| C(56)-C(55)-H(55B)  | 109.3      |
| C(54)-C(55)-H(55B)  | 109.3      |
| H(55A)-C(55)-H(55B) | 108.0      |
| C(55)-C(56)-C(57)   | 110.1(2)   |
| C(55)-C(56)-H(56A)  | 109.6      |
| C(57)-C(56)-H(56A)  | 109.6      |
| C(55)-C(56)-H(56B)  | 109.6      |
| C(57)-C(56)-H(56B)  | 109.6      |
| H(56A)-C(56)-H(56B) | 108.2      |
| C(58)-C(57)-C(56)   | 111.45(19) |
| C(58)-C(57)-H(57A)  | 109.3      |
| C(56)-C(57)-H(57A)  | 109.3      |
| C(58)-C(57)-H(57B)  | 109.3      |
| C(56)-C(57)-H(57B)  | 109.3      |
| H(57A)-C(57)-H(57B) | 108.0      |
| C(57)-C(58)-C(53)   | 111.63(17) |
| C(57)-C(58)-H(58A)  | 109.3      |
| C(53)-C(58)-H(58A)  | 109.3      |
| C(57)-C(58)-H(58B)  | 109.3      |
| C(53)-C(58)-H(58B)  | 109.3      |
| H(58A)-C(58)-H(58B) | 108.0      |
| O(3)-P(3)-N(3)      | 111.43(8)  |
| O(3)-P(3)-C(59)     | 113.29(8)  |
| N(3)-P(3)-C(59)     | 106.09(8)  |
| O(3)-P(3)-C(65)     | 111.00(8)  |

|                    |            |
|--------------------|------------|
| N(3)-P(3)-C(65)    | 111.62(8)  |
| C(59)-P(3)-C(65)   | 103.05(9)  |
| C(71)-N(3)-P(3)    | 119.08(12) |
| C(71)-N(3)-H(3N)   | 120.5      |
| P(3)-N(3)-H(3N)    | 120.5      |
| C(60)-C(59)-C(64)  | 118.76(18) |
| C(60)-C(59)-P(3)   | 121.52(15) |
| C(64)-C(59)-P(3)   | 119.40(15) |
| C(59)-C(60)-C(61)  | 120.0(2)   |
| C(59)-C(60)-H(60A) | 120.0      |
| C(61)-C(60)-H(60A) | 120.0      |
| C(62)-C(61)-C(60)  | 120.4(2)   |
| C(62)-C(61)-H(61A) | 119.8      |
| C(60)-C(61)-H(61A) | 119.8      |
| C(63)-C(62)-C(61)  | 119.9(2)   |
| C(63)-C(62)-H(62A) | 120.1      |
| C(61)-C(62)-H(62A) | 120.1      |
| C(62)-C(63)-C(64)  | 120.5(2)   |
| C(62)-C(63)-H(63A) | 119.7      |
| C(64)-C(63)-H(63A) | 119.7      |
| C(63)-C(64)-C(59)  | 120.4(2)   |
| C(63)-C(64)-H(64A) | 119.8      |
| C(59)-C(64)-H(64A) | 119.8      |
| C(66)-C(65)-C(70)  | 119.26(18) |
| C(66)-C(65)-P(3)   | 119.92(15) |
| C(70)-C(65)-P(3)   | 120.64(15) |
| C(65)-C(66)-C(67)  | 120.52(19) |
| C(65)-C(66)-H(66A) | 119.7      |
| C(67)-C(66)-H(66A) | 119.7      |
| C(68)-C(67)-C(66)  | 120.12(19) |
| C(68)-C(67)-H(67A) | 119.9      |
| C(66)-C(67)-H(67A) | 119.9      |
| C(67)-C(68)-C(69)  | 119.6(2)   |
| C(67)-C(68)-H(68A) | 120.2      |
| C(69)-C(68)-H(68A) | 120.2      |
| C(70)-C(69)-C(68)  | 120.5(2)   |

|                    |            |
|--------------------|------------|
| C(70)-C(69)-H(69A) | 119.8      |
| C(68)-C(69)-H(69A) | 119.8      |
| C(69)-C(70)-C(65)  | 120.06(19) |
| C(69)-C(70)-H(70A) | 120.0      |
| C(65)-C(70)-H(70A) | 120.0      |
| N(3)-C(71)-C(72)   | 112.62(16) |
| N(3)-C(71)-C(78)   | 111.92(15) |
| C(72)-C(71)-C(78)  | 112.36(16) |
| N(3)-C(71)-H(71A)  | 106.5      |
| C(72)-C(71)-H(71A) | 106.5      |
| C(78)-C(71)-H(71A) | 106.5      |
| C(77)-C(72)-C(73)  | 118.25(19) |
| C(77)-C(72)-C(71)  | 120.26(18) |
| C(73)-C(72)-C(71)  | 121.47(18) |
| C(74)-C(73)-C(72)  | 120.7(2)   |
| C(74)-C(73)-H(73A) | 119.6      |
| C(72)-C(73)-H(73A) | 119.6      |
| C(73)-C(74)-C(75)  | 120.7(2)   |
| C(73)-C(74)-H(74A) | 119.6      |
| C(75)-C(74)-H(74A) | 119.6      |
| C(76)-C(75)-C(74)  | 118.4(2)   |
| C(76)-C(75)-H(75A) | 120.8      |
| C(74)-C(75)-H(75A) | 120.8      |
| C(75)-C(76)-C(77)  | 120.6(2)   |
| C(75)-C(76)-H(76A) | 119.7      |
| C(77)-C(76)-H(76A) | 119.7      |
| C(72)-C(77)-C(76)  | 121.2(2)   |
| C(72)-C(77)-H(77A) | 119.4      |
| C(76)-C(77)-H(77A) | 119.4      |
| C(80)-C(78)-C(79)  | 111.29(17) |
| C(80)-C(78)-C(71)  | 106.44(16) |
| C(79)-C(78)-C(71)  | 111.24(16) |
| C(80)-C(78)-C(82)  | 108.84(17) |
| C(79)-C(78)-C(82)  | 109.41(16) |
| C(71)-C(78)-C(82)  | 109.55(16) |
| C(78)-C(79)-H(79A) | 109.5      |

|                     |            |
|---------------------|------------|
| C(78)-C(79)-H(79B)  | 109.5      |
| H(79A)-C(79)-H(79B) | 109.5      |
| C(78)-C(79)-H(79C)  | 109.5      |
| H(79A)-C(79)-H(79C) | 109.5      |
| H(79B)-C(79)-H(79C) | 109.5      |
| C(81)-C(80)-C(78)   | 128.4(2)   |
| C(81)-C(80)-H(80A)  | 115.8      |
| C(78)-C(80)-H(80A)  | 115.8      |
| C(80)-C(81)-H(81A)  | 120.0      |
| C(80)-C(81)-H(81B)  | 120.0      |
| H(81A)-C(81)-H(81B) | 120.0      |
| C(87)-C(82)-C(83)   | 108.74(17) |
| C(87)-C(82)-C(78)   | 114.06(17) |
| C(83)-C(82)-C(78)   | 113.34(17) |
| C(87)-C(82)-H(82A)  | 106.7      |
| C(83)-C(82)-H(82A)  | 106.7      |
| C(78)-C(82)-H(82A)  | 106.7      |
| C(84)-C(83)-C(82)   | 111.31(19) |
| C(84)-C(83)-H(83A)  | 109.4      |
| C(82)-C(83)-H(83A)  | 109.4      |
| C(84)-C(83)-H(83B)  | 109.4      |
| C(82)-C(83)-H(83B)  | 109.4      |
| H(83A)-C(83)-H(83B) | 108.0      |
| C(83)-C(84)-C(85)   | 112.2(2)   |
| C(83)-C(84)-H(84A)  | 109.2      |
| C(85)-C(84)-H(84A)  | 109.2      |
| C(83)-C(84)-H(84B)  | 109.2      |
| C(85)-C(84)-H(84B)  | 109.2      |
| H(84A)-C(84)-H(84B) | 107.9      |
| C(86)-C(85)-C(84)   | 110.18(19) |
| C(86)-C(85)-H(85A)  | 109.6      |
| C(84)-C(85)-H(85A)  | 109.6      |
| C(86)-C(85)-H(85B)  | 109.6      |
| C(84)-C(85)-H(85B)  | 109.6      |
| H(85A)-C(85)-H(85B) | 108.1      |
| C(85)-C(86)-C(87)   | 110.8(2)   |

|                     |            |
|---------------------|------------|
| C(85)-C(86)-H(86A)  | 109.5      |
| C(87)-C(86)-H(86A)  | 109.5      |
| C(85)-C(86)-H(86B)  | 109.5      |
| C(87)-C(86)-H(86B)  | 109.5      |
| H(86A)-C(86)-H(86B) | 108.1      |
| C(82)-C(87)-C(86)   | 111.50(18) |
| C(82)-C(87)-H(87A)  | 109.3      |
| C(86)-C(87)-H(87A)  | 109.3      |
| C(82)-C(87)-H(87B)  | 109.3      |
| C(86)-C(87)-H(87B)  | 109.3      |
| H(87A)-C(87)-H(87B) | 108.0      |
| O(4)-P(4)-N(4)      | 111.86(8)  |
| O(4)-P(4)-C(94)     | 110.46(9)  |
| N(4)-P(4)-C(94)     | 110.72(8)  |
| O(4)-P(4)-C(88)     | 114.94(9)  |
| N(4)-P(4)-C(88)     | 102.72(9)  |
| C(94)-P(4)-C(88)    | 105.77(9)  |
| C(100)-N(4)-P(4)    | 118.03(13) |
| C(100)-N(4)-H(4N)   | 121.0      |
| P(4)-N(4)-H(4N)     | 121.0      |
| C(93)-C(88)-C(89)   | 118.96(19) |
| C(93)-C(88)-P(4)    | 121.25(16) |
| C(89)-C(88)-P(4)    | 119.68(15) |
| C(90)-C(89)-C(88)   | 119.9(2)   |
| C(90)-C(89)-H(89A)  | 120.0      |
| C(88)-C(89)-H(89A)  | 120.0      |
| C(91)-C(90)-C(89)   | 120.1(2)   |
| C(91)-C(90)-H(90A)  | 120.0      |
| C(89)-C(90)-H(90A)  | 120.0      |
| C(90)-C(91)-C(92)   | 120.5(2)   |
| C(90)-C(91)-H(91A)  | 119.8      |
| C(92)-C(91)-H(91A)  | 119.8      |
| C(93)-C(92)-C(91)   | 119.6(2)   |
| C(93)-C(92)-H(92A)  | 120.2      |
| C(91)-C(92)-H(92A)  | 120.2      |
| C(92)-C(93)-C(88)   | 121.0(2)   |



|                      |            |
|----------------------|------------|
| C(92)-C(93)-H(93A)   | 119.5      |
| C(88)-C(93)-H(93A)   | 119.5      |
| C(95)-C(94)-C(99)    | 119.27(18) |
| C(95)-C(94)-P(4)     | 120.71(15) |
| C(99)-C(94)-P(4)     | 119.98(15) |
| C(96)-C(95)-C(94)    | 120.3(2)   |
| C(96)-C(95)-H(95A)   | 119.8      |
| C(94)-C(95)-H(95A)   | 119.8      |
| C(95)-C(96)-C(97)    | 120.3(2)   |
| C(95)-C(96)-H(96A)   | 119.8      |
| C(97)-C(96)-H(96A)   | 119.8      |
| C(96)-C(97)-C(98)    | 119.8(2)   |
| C(96)-C(97)-H(97A)   | 120.1      |
| C(98)-C(97)-H(97A)   | 120.1      |
| C(99)-C(98)-C(97)    | 120.3(2)   |
| C(99)-C(98)-H(98A)   | 119.8      |
| C(97)-C(98)-H(98A)   | 119.8      |
| C(98)-C(99)-C(94)    | 120.0(2)   |
| C(98)-C(99)-H(99A)   | 120.0      |
| C(94)-C(99)-H(99A)   | 120.0      |
| N(4)-C(100)-C(101)   | 112.40(15) |
| N(4)-C(100)-C(107)   | 111.05(15) |
| C(101)-C(100)-C(107) | 112.38(16) |
| N(4)-C(100)-H(10B)   | 106.9      |
| C(101)-C(100)-H(10B) | 106.9      |
| C(107)-C(100)-H(10B) | 106.9      |
| C(102)-C(101)-C(106) | 118.4(2)   |
| C(102)-C(101)-C(100) | 121.74(19) |
| C(106)-C(101)-C(100) | 119.83(19) |
| C(103)-C(102)-C(101) | 120.9(2)   |
| C(103)-C(102)-H(10C) | 119.6      |
| C(101)-C(102)-H(10C) | 119.6      |
| C(104)-C(103)-C(102) | 120.1(2)   |
| C(104)-C(103)-H(10D) | 120.0      |
| C(102)-C(103)-H(10D) | 120.0      |
| C(105)-C(104)-C(103) | 119.9(2)   |

|                      |            |
|----------------------|------------|
| C(105)-C(104)-H(10E) | 120.1      |
| C(103)-C(104)-H(10E) | 120.1      |
| C(104)-C(105)-C(106) | 120.3(2)   |
| C(104)-C(105)-H(10F) | 119.9      |
| C(106)-C(105)-H(10F) | 119.9      |
| C(101)-C(106)-C(105) | 120.4(2)   |
| C(101)-C(106)-H(10G) | 119.8      |
| C(105)-C(106)-H(10G) | 119.8      |
| C(109)-C(107)-C(108) | 111.77(17) |
| C(109)-C(107)-C(111) | 110.35(15) |
| C(108)-C(107)-C(111) | 108.70(16) |
| C(109)-C(107)-C(100) | 106.05(15) |
| C(108)-C(107)-C(100) | 110.12(15) |
| C(111)-C(107)-C(100) | 109.83(15) |
| C(107)-C(108)-H(10H) | 109.5      |
| C(107)-C(108)-H(10I) | 109.5      |
| H(10H)-C(108)-H(10I) | 109.5      |
| C(107)-C(108)-H(10J) | 109.5      |
| H(10H)-C(108)-H(10J) | 109.5      |
| H(10I)-C(108)-H(10J) | 109.5      |
| C(110)-C(109)-C(107) | 129.0(2)   |
| C(110)-C(109)-H(10K) | 115.5      |
| C(107)-C(109)-H(10K) | 115.5      |
| C(109)-C(110)-H(11B) | 120.0      |
| C(109)-C(110)-H(11C) | 120.0      |
| H(11B)-C(110)-H(11C) | 120.0      |
| C(116)-C(111)-C(112) | 109.50(15) |
| C(116)-C(111)-C(107) | 114.51(15) |
| C(112)-C(111)-C(107) | 111.32(15) |
| C(116)-C(111)-H(11E) | 107.0      |
| C(112)-C(111)-H(11E) | 107.0      |
| C(107)-C(111)-H(11E) | 107.0      |
| C(113)-C(112)-C(111) | 111.52(16) |
| C(113)-C(112)-H(11F) | 109.3      |
| C(111)-C(112)-H(11F) | 109.3      |
| C(113)-C(112)-H(11G) | 109.3      |

|                      |            |
|----------------------|------------|
| C(111)-C(112)-H(11G) | 109.3      |
| H(11F)-C(112)-H(11G) | 108.0      |
| C(114)-C(113)-C(112) | 111.05(17) |
| C(114)-C(113)-H(11H) | 109.4      |
| C(112)-C(113)-H(11H) | 109.4      |
| C(114)-C(113)-H(11I) | 109.4      |
| C(112)-C(113)-H(11I) | 109.4      |
| H(11H)-C(113)-H(11I) | 108.0      |
| C(115)-C(114)-C(113) | 109.77(17) |
| C(115)-C(114)-H(11J) | 109.7      |
| C(113)-C(114)-H(11J) | 109.7      |
| C(115)-C(114)-H(11K) | 109.7      |
| C(113)-C(114)-H(11K) | 109.7      |
| H(11J)-C(114)-H(11K) | 108.2      |
| C(114)-C(115)-C(116) | 111.12(17) |
| C(114)-C(115)-H(11L) | 109.4      |
| C(116)-C(115)-H(11L) | 109.4      |
| C(114)-C(115)-H(11M) | 109.4      |
| C(116)-C(115)-H(11M) | 109.4      |
| H(11L)-C(115)-H(11M) | 108.0      |
| C(111)-C(116)-C(115) | 111.53(17) |
| C(111)-C(116)-H(11N) | 109.3      |
| C(115)-C(116)-H(11N) | 109.3      |
| C(111)-C(116)-H(11O) | 109.3      |
| C(115)-C(116)-H(11O) | 109.3      |
| H(11N)-C(116)-H(11O) | 108.0      |
| O(5)-P(5)-N(5)       | 112.21(8)  |
| O(5)-P(5)-C(117)     | 110.88(9)  |
| N(5)-P(5)-C(117)     | 109.54(8)  |
| O(5)-P(5)-C(123)     | 111.93(8)  |
| N(5)-P(5)-C(123)     | 106.79(9)  |
| C(117)-P(5)-C(123)   | 105.16(9)  |
| C(129)-N(5)-P(5)     | 122.21(12) |
| C(129)-N(5)-H(5N)    | 118.9      |
| P(5)-N(5)-H(5N)      | 118.9      |
| C(122)-C(117)-C(118) | 119.31(18) |

|                      |            |
|----------------------|------------|
| C(122)-C(117)-P(5)   | 121.60(15) |
| C(118)-C(117)-P(5)   | 119.09(15) |
| C(119)-C(118)-C(117) | 119.8(2)   |
| C(119)-C(118)-H(11P) | 120.1      |
| C(117)-C(118)-H(11P) | 120.1      |
| C(120)-C(119)-C(118) | 120.6(2)   |
| C(120)-C(119)-H(11Q) | 119.7      |
| C(118)-C(119)-H(11Q) | 119.7      |
| C(119)-C(120)-C(121) | 119.7(2)   |
| C(119)-C(120)-H(12B) | 120.2      |
| C(121)-C(120)-H(12B) | 120.2      |
| C(120)-C(121)-C(122) | 120.6(2)   |
| C(120)-C(121)-H(12C) | 119.7      |
| C(122)-C(121)-H(12C) | 119.7      |
| C(121)-C(122)-C(117) | 120.0(2)   |
| C(121)-C(122)-H(12D) | 120.0      |
| C(117)-C(122)-H(12D) | 120.0      |
| C(124)-C(123)-C(128) | 118.8(2)   |
| C(124)-C(123)-P(5)   | 121.90(17) |
| C(128)-C(123)-P(5)   | 119.00(16) |
| C(125)-C(124)-C(123) | 120.5(2)   |
| C(125)-C(124)-H(12E) | 119.8      |
| C(123)-C(124)-H(12E) | 119.8      |
| C(124)-C(125)-C(126) | 120.1(2)   |
| C(124)-C(125)-H(12F) | 119.9      |
| C(126)-C(125)-H(12F) | 119.9      |
| C(127)-C(126)-C(125) | 120.1(2)   |
| C(127)-C(126)-H(12G) | 120.0      |
| C(125)-C(126)-H(12G) | 120.0      |
| C(128)-C(127)-C(126) | 120.2(3)   |
| C(128)-C(127)-H(12H) | 119.9      |
| C(126)-C(127)-H(12H) | 119.9      |
| C(127)-C(128)-C(123) | 120.3(2)   |
| C(127)-C(128)-H(12I) | 119.8      |
| C(123)-C(128)-H(12I) | 119.8      |
| N(5)-C(129)-C(130)   | 111.22(16) |

|                      |            |
|----------------------|------------|
| N(5)-C(129)-C(136)   | 112.91(15) |
| C(130)-C(129)-C(136) | 112.81(16) |
| N(5)-C(129)-H(12J)   | 106.5      |
| C(130)-C(129)-H(12J) | 106.5      |
| C(136)-C(129)-H(12J) | 106.5      |
| C(135)-C(130)-C(131) | 118.28(18) |
| C(135)-C(130)-C(129) | 119.45(18) |
| C(131)-C(130)-C(129) | 122.26(17) |
| C(130)-C(131)-C(132) | 120.33(19) |
| C(130)-C(131)-H(13B) | 119.8      |
| C(132)-C(131)-H(13B) | 119.8      |
| C(133)-C(132)-C(131) | 120.7(2)   |
| C(133)-C(132)-H(13C) | 119.6      |
| C(131)-C(132)-H(13C) | 119.6      |
| C(132)-C(133)-C(134) | 119.5(2)   |
| C(132)-C(133)-H(13D) | 120.2      |
| C(134)-C(133)-H(13D) | 120.2      |
| C(133)-C(134)-C(135) | 119.9(2)   |
| C(133)-C(134)-H(13E) | 120.1      |
| C(135)-C(134)-H(13E) | 120.1      |
| C(130)-C(135)-C(134) | 121.2(2)   |
| C(130)-C(135)-H(13F) | 119.4      |
| C(134)-C(135)-H(13F) | 119.4      |
| C(138)-C(136)-C(137) | 111.96(18) |
| C(138)-C(136)-C(129) | 106.73(17) |
| C(137)-C(136)-C(129) | 110.21(16) |
| C(138)-C(136)-C(140) | 109.35(16) |
| C(137)-C(136)-C(140) | 108.97(17) |
| C(129)-C(136)-C(140) | 109.59(16) |
| C(136)-C(137)-H(13G) | 109.5      |
| C(136)-C(137)-H(13H) | 109.5      |
| H(13G)-C(137)-H(13H) | 109.5      |
| C(136)-C(137)-H(13I) | 109.5      |
| H(13G)-C(137)-H(13I) | 109.5      |
| H(13H)-C(137)-H(13I) | 109.5      |
| C(139)-C(138)-C(136) | 127.3(3)   |

|                      |            |
|----------------------|------------|
| C(139)-C(138)-H(13J) | 116.4      |
| C(136)-C(138)-H(13J) | 116.4      |
| C(138)-C(139)-H(13K) | 120.0      |
| C(138)-C(139)-H(13L) | 120.0      |
| H(13K)-C(139)-H(13L) | 120.0      |
| C(145)-C(140)-C(141) | 108.34(18) |
| C(145)-C(140)-C(136) | 114.06(17) |
| C(141)-C(140)-C(136) | 112.79(18) |
| C(145)-C(140)-H(14A) | 107.1      |
| C(141)-C(140)-H(14A) | 107.1      |
| C(136)-C(140)-H(14A) | 107.1      |
| C(142)-C(141)-C(140) | 111.9(2)   |
| C(142)-C(141)-H(14B) | 109.2      |
| C(140)-C(141)-H(14B) | 109.2      |
| C(142)-C(141)-H(14C) | 109.2      |
| C(140)-C(141)-H(14C) | 109.2      |
| H(14B)-C(141)-H(14C) | 107.9      |
| C(141)-C(142)-C(143) | 112.0(2)   |
| C(141)-C(142)-H(14D) | 109.2      |
| C(143)-C(142)-H(14D) | 109.2      |
| C(141)-C(142)-H(14E) | 109.2      |
| C(143)-C(142)-H(14E) | 109.2      |
| H(14D)-C(142)-H(14E) | 107.9      |
| C(144)-C(143)-C(142) | 109.4(2)   |
| C(144)-C(143)-H(14F) | 109.8      |
| C(142)-C(143)-H(14F) | 109.8      |
| C(144)-C(143)-H(14G) | 109.8      |
| C(142)-C(143)-H(14G) | 109.8      |
| H(14F)-C(143)-H(14G) | 108.2      |
| C(143)-C(144)-C(145) | 111.3(2)   |
| C(143)-C(144)-H(14H) | 109.4      |
| C(145)-C(144)-H(14H) | 109.4      |
| C(143)-C(144)-H(14I) | 109.4      |
| C(145)-C(144)-H(14I) | 109.4      |
| H(14H)-C(144)-H(14I) | 108.0      |
| C(144)-C(145)-C(140) | 111.41(17) |

|                      |            |
|----------------------|------------|
| C(144)-C(145)-H(14J) | 109.3      |
| C(140)-C(145)-H(14J) | 109.3      |
| C(144)-C(145)-H(14K) | 109.3      |
| C(140)-C(145)-H(14K) | 109.3      |
| H(14J)-C(145)-H(14K) | 108.0      |
| O(6)-P(6)-N(6)       | 110.90(9)  |
| O(6)-P(6)-C(152)     | 111.01(9)  |
| N(6)-P(6)-C(152)     | 112.32(9)  |
| O(6)-P(6)-C(146)     | 112.79(9)  |
| N(6)-P(6)-C(146)     | 104.33(8)  |
| C(152)-P(6)-C(146)   | 105.23(10) |
| C(158)-N(6)-P(6)     | 117.85(13) |
| C(158)-N(6)-H(6N)    | 121.1      |
| P(6)-N(6)-H(6N)      | 121.1      |
| C(151)-C(146)-C(147) | 118.64(18) |
| C(151)-C(146)-P(6)   | 123.86(16) |
| C(147)-C(146)-P(6)   | 117.38(16) |
| C(148)-C(147)-C(146) | 120.4(2)   |
| C(148)-C(147)-H(14L) | 119.8      |
| C(146)-C(147)-H(14L) | 119.8      |
| C(147)-C(148)-C(149) | 120.7(2)   |
| C(147)-C(148)-H(14M) | 119.7      |
| C(149)-C(148)-H(14M) | 119.7      |
| C(150)-C(149)-C(148) | 119.9(2)   |
| C(150)-C(149)-H(14N) | 120.0      |
| C(148)-C(149)-H(14N) | 120.0      |
| C(149)-C(150)-C(151) | 119.7(2)   |
| C(149)-C(150)-H(15B) | 120.2      |
| C(151)-C(150)-H(15B) | 120.2      |
| C(146)-C(151)-C(150) | 120.7(2)   |
| C(146)-C(151)-H(15C) | 119.7      |
| C(150)-C(151)-H(15C) | 119.7      |
| C(153)-C(152)-C(157) | 119.6(2)   |
| C(153)-C(152)-P(6)   | 120.22(17) |
| C(157)-C(152)-P(6)   | 120.14(15) |
| C(154)-C(153)-C(152) | 119.7(2)   |

|                      |            |
|----------------------|------------|
| C(154)-C(153)-H(15D) | 120.2      |
| C(152)-C(153)-H(15D) | 120.2      |
| C(155)-C(154)-C(153) | 120.3(2)   |
| C(155)-C(154)-H(15E) | 119.9      |
| C(153)-C(154)-H(15E) | 119.9      |
| C(154)-C(155)-C(156) | 120.8(2)   |
| C(154)-C(155)-H(15F) | 119.6      |
| C(156)-C(155)-H(15F) | 119.6      |
| C(155)-C(156)-C(157) | 119.8(2)   |
| C(155)-C(156)-H(15G) | 120.1      |
| C(157)-C(156)-H(15G) | 120.1      |
| C(156)-C(157)-C(152) | 119.8(2)   |
| C(156)-C(157)-H(15H) | 120.1      |
| C(152)-C(157)-H(15H) | 120.1      |
| N(6)-C(158)-C(159)   | 112.44(16) |
| N(6)-C(158)-C(165)   | 112.12(15) |
| C(159)-C(158)-C(165) | 113.06(16) |
| N(6)-C(158)-H(15I)   | 106.2      |
| C(159)-C(158)-H(15I) | 106.2      |
| C(165)-C(158)-H(15I) | 106.2      |
| C(164)-C(159)-C(160) | 118.8(2)   |
| C(164)-C(159)-C(158) | 119.19(19) |
| C(160)-C(159)-C(158) | 121.96(18) |
| C(159)-C(160)-C(161) | 119.9(2)   |
| C(159)-C(160)-H(16B) | 120.0      |
| C(161)-C(160)-H(16B) | 120.0      |
| C(162)-C(161)-C(160) | 120.4(2)   |
| C(162)-C(161)-H(16C) | 119.8      |
| C(160)-C(161)-H(16C) | 119.8      |
| C(163)-C(162)-C(161) | 119.8(2)   |
| C(163)-C(162)-H(16D) | 120.1      |
| C(161)-C(162)-H(16D) | 120.1      |
| C(162)-C(163)-C(164) | 120.3(2)   |
| C(162)-C(163)-H(16E) | 119.8      |
| C(164)-C(163)-H(16E) | 119.8      |
| C(163)-C(164)-C(159) | 120.8(2)   |



|                      |            |
|----------------------|------------|
| C(163)-C(164)-H(16F) | 119.6      |
| C(159)-C(164)-H(16F) | 119.6      |
| C(167)-C(165)-C(166) | 111.10(18) |
| C(167)-C(165)-C(158) | 106.57(17) |
| C(166)-C(165)-C(158) | 109.55(16) |
| C(167)-C(165)-C(169) | 109.89(17) |
| C(166)-C(165)-C(169) | 109.43(17) |
| C(158)-C(165)-C(169) | 110.27(17) |
| C(165)-C(166)-H(16G) | 109.5      |
| C(165)-C(166)-H(16H) | 109.5      |
| H(16G)-C(166)-H(16H) | 109.5      |
| C(165)-C(166)-H(16I) | 109.5      |
| H(16G)-C(166)-H(16I) | 109.5      |
| H(16H)-C(166)-H(16I) | 109.5      |
| C(168)-C(167)-C(165) | 128.0(2)   |
| C(168)-C(167)-H(16J) | 116.0      |
| C(165)-C(167)-H(16J) | 116.0      |
| C(167)-C(168)-H(16K) | 120.0      |
| C(167)-C(168)-H(16L) | 120.0      |
| H(16K)-C(168)-H(16L) | 120.0      |
| C(174)-C(169)-C(170) | 109.05(19) |
| C(174)-C(169)-C(165) | 114.35(19) |
| C(170)-C(169)-C(165) | 112.72(19) |
| C(174)-C(169)-H(16N) | 106.7      |
| C(170)-C(169)-H(16N) | 106.7      |
| C(165)-C(169)-H(16N) | 106.7      |
| C(169)-C(170)-C(171) | 112.6(2)   |
| C(169)-C(170)-H(17B) | 109.1      |
| C(171)-C(170)-H(17B) | 109.1      |
| C(169)-C(170)-H(17C) | 109.1      |
| C(171)-C(170)-H(17C) | 109.1      |
| H(17B)-C(170)-H(17C) | 107.8      |
| C(172)-C(171)-C(170) | 110.7(3)   |
| C(172)-C(171)-H(17D) | 109.5      |
| C(170)-C(171)-H(17D) | 109.5      |
| C(172)-C(171)-H(17E) | 109.5      |

|                      |          |
|----------------------|----------|
| C(170)-C(171)-H(17E) | 109.5    |
| H(17D)-C(171)-H(17E) | 108.1    |
| C(173)-C(172)-C(171) | 109.8(2) |
| C(173)-C(172)-H(17F) | 109.7    |
| C(171)-C(172)-H(17F) | 109.7    |
| C(173)-C(172)-H(17G) | 109.7    |
| C(171)-C(172)-H(17G) | 109.7    |
| H(17F)-C(172)-H(17G) | 108.2    |
| C(174)-C(173)-C(172) | 111.6(2) |
| C(174)-C(173)-H(17H) | 109.3    |
| C(172)-C(173)-H(17H) | 109.3    |
| C(174)-C(173)-H(17I) | 109.3    |
| C(172)-C(173)-H(17I) | 109.3    |
| H(17H)-C(173)-H(17I) | 108.0    |
| C(173)-C(174)-C(169) | 111.9(2) |
| C(173)-C(174)-H(17J) | 109.2    |
| C(169)-C(174)-H(17J) | 109.2    |
| C(173)-C(174)-H(17K) | 109.2    |
| C(169)-C(174)-H(17K) | 109.2    |
| H(17J)-C(174)-H(17K) | 107.9    |

---

Symmetry transformations used to generate equivalent atoms:

**Table 4. Anisotropic displacement parameters ( $\text{\AA}^2 \times 10^3$ ) for  $\text{C}_{29}\text{H}_{34}\text{NOP}$  (13). The anisotropic displacement factor exponent takes the form:  $-2p^2 [ h^2 a^* U_{11} + \dots + 2 h k a^* b^* U_{12} ]$**

|      | U11   | U22   | U33   | U23   | U13   | U12   |
|------|-------|-------|-------|-------|-------|-------|
| P(1) | 23(1) | 14(1) | 19(1) | -1(1) | 12(1) | -1(1) |
| O(1) | 30(1) | 14(1) | 24(1) | 0(1)  | 15(1) | 1(1)  |
| N(1) | 31(1) | 13(1) | 22(1) | 0(1)  | 17(1) | 1(1)  |
| C(1) | 22(1) | 22(1) | 22(1) | -2(1) | 12(1) | -5(1) |
| C(2) | 26(1) | 21(1) | 30(1) | 6(1)  | 10(1) | -1(1) |

|       |       |       |        |        |       |        |
|-------|-------|-------|--------|--------|-------|--------|
| C(3)  | 24(1) | 32(1) | 43(1)  | 13(1)  | 13(1) | -4(1)  |
| C(4)  | 22(1) | 40(1) | 41(1)  | 3(1)   | 18(1) | -1(1)  |
| C(5)  | 28(1) | 27(1) | 42(1)  | -6(1)  | 19(1) | -2(1)  |
| C(6)  | 28(1) | 19(1) | 35(1)  | -4(1)  | 17(1) | -5(1)  |
| C(7)  | 26(1) | 13(1) | 21(1)  | 1(1)   | 12(1) | -2(1)  |
| C(8)  | 26(1) | 29(1) | 26(1)  | -2(1)  | 16(1) | -5(1)  |
| C(9)  | 37(1) | 33(1) | 26(1)  | -4(1)  | 19(1) | -5(1)  |
| C(10) | 33(1) | 32(1) | 21(1)  | 0(1)   | 8(1)  | -3(1)  |
| C(11) | 24(1) | 32(1) | 31(1)  | 3(1)   | 13(1) | 0(1)   |
| C(12) | 28(1) | 26(1) | 25(1)  | 0(1)   | 17(1) | -2(1)  |
| C(13) | 29(1) | 16(1) | 21(1)  | -3(1)  | 14(1) | -2(1)  |
| C(14) | 27(1) | 23(1) | 18(1)  | 3(1)   | 13(1) | -2(1)  |
| C(15) | 36(1) | 23(1) | 33(1)  | -2(1)  | 20(1) | -4(1)  |
| C(16) | 32(1) | 31(1) | 40(1)  | 2(1)   | 17(1) | -9(1)  |
| C(17) | 29(1) | 42(1) | 41(1)  | 8(1)   | 22(1) | -3(1)  |
| C(18) | 38(1) | 37(1) | 33(1)  | 6(1)   | 24(1) | 7(1)   |
| C(19) | 34(1) | 27(1) | 24(1)  | -2(1)  | 20(1) | -2(1)  |
| C(20) | 31(1) | 18(1) | 19(1)  | 0(1)   | 11(1) | 2(1)   |
| C(21) | 40(1) | 20(1) | 25(1)  | 1(1)   | 16(1) | 1(1)   |
| C(22) | 40(1) | 21(1) | 22(1)  | -1(1)  | 13(1) | 3(1)   |
| C(23) | 68(2) | 34(1) | 29(1)  | 1(1)   | 27(1) | 9(1)   |
| C(24) | 29(1) | 25(1) | 29(1)  | -2(1)  | 10(1) | 1(1)   |
| C(25) | 37(1) | 36(1) | 39(1)  | 5(1)   | 4(1)  | 3(1)   |
| C(26) | 32(1) | 47(2) | 58(2)  | -1(1)  | 2(1)  | 4(1)   |
| C(27) | 30(1) | 46(2) | 53(2)  | -8(1)  | 7(1)  | -3(1)  |
| C(28) | 29(1) | 37(1) | 52(2)  | -10(1) | 18(1) | -6(1)  |
| C(29) | 28(1) | 23(1) | 36(1)  | -5(1)  | 13(1) | -3(1)  |
| P(2)  | 27(1) | 16(1) | 23(1)  | -3(1)  | 17(1) | -4(1)  |
| O(2)  | 42(1) | 16(1) | 31(1)  | -3(1)  | 24(1) | -4(1)  |
| N(2)  | 31(1) | 17(1) | 23(1)  | -1(1)  | 18(1) | -6(1)  |
| C(30) | 26(1) | 31(1) | 25(1)  | -6(1)  | 16(1) | -5(1)  |
| C(31) | 31(1) | 35(1) | 30(1)  | -5(1)  | 19(1) | -1(1)  |
| C(32) | 32(1) | 54(2) | 44(1)  | -13(1) | 20(1) | 7(1)   |
| C(33) | 25(1) | 85(2) | 76(2)  | -35(2) | 19(1) | -1(1)  |
| C(34) | 29(1) | 74(2) | 111(3) | -52(2) | 29(2) | -19(1) |
| C(35) | 38(1) | 42(2) | 68(2)  | -28(1) | 28(1) | -13(1) |

|       |       |       |       |        |       |        |
|-------|-------|-------|-------|--------|-------|--------|
| C(36) | 25(1) | 19(1) | 22(1) | -5(1)  | 16(1) | -6(1)  |
| C(37) | 34(1) | 30(1) | 29(1) | 5(1)   | 20(1) | 4(1)   |
| C(38) | 52(1) | 29(1) | 33(1) | 4(1)   | 29(1) | 0(1)   |
| C(39) | 47(1) | 32(1) | 35(1) | -10(1) | 32(1) | -15(1) |
| C(40) | 26(1) | 30(1) | 31(1) | -7(1)  | 17(1) | -5(1)  |
| C(41) | 29(1) | 22(1) | 30(1) | -4(1)  | 18(1) | -3(1)  |
| C(42) | 30(1) | 15(1) | 23(1) | 0(1)   | 18(1) | -1(1)  |
| C(43) | 29(1) | 25(1) | 20(1) | -4(1)  | 15(1) | -5(1)  |
| C(44) | 40(1) | 31(1) | 29(1) | -4(1)  | 21(1) | -11(1) |
| C(45) | 47(1) | 53(2) | 36(1) | -14(1) | 30(1) | -25(1) |
| C(46) | 30(1) | 68(2) | 37(1) | -22(1) | 22(1) | -13(1) |
| C(47) | 31(1) | 51(2) | 25(1) | -10(1) | 12(1) | 4(1)   |
| C(48) | 30(1) | 29(1) | 22(1) | -2(1)  | 13(1) | -1(1)  |
| C(49) | 28(1) | 14(1) | 25(1) | 2(1)   | 16(1) | 0(1)   |
| C(50) | 30(1) | 21(1) | 22(1) | -2(1)  | 14(1) | -2(1)  |
| C(51) | 34(1) | 20(1) | 28(1) | 2(1)   | 16(1) | -2(1)  |
| C(52) | 53(1) | 31(1) | 29(1) | 7(1)   | 19(1) | -6(1)  |
| C(53) | 28(1) | 19(1) | 31(1) | 1(1)   | 17(1) | 1(1)   |
| C(54) | 34(1) | 33(1) | 37(1) | -8(1)  | 18(1) | -3(1)  |
| C(55) | 29(1) | 45(1) | 55(2) | -12(1) | 22(1) | -5(1)  |
| C(56) | 32(1) | 43(1) | 52(2) | -6(1)  | 22(1) | 3(1)   |
| C(57) | 36(1) | 32(1) | 43(1) | -3(1)  | 25(1) | 6(1)   |
| C(58) | 32(1) | 21(1) | 32(1) | -1(1)  | 19(1) | 2(1)   |
| P(3)  | 19(1) | 14(1) | 21(1) | 0(1)   | 9(1)  | -1(1)  |
| O(3)  | 25(1) | 18(1) | 25(1) | 0(1)   | 11(1) | 0(1)   |
| N(3)  | 21(1) | 12(1) | 21(1) | -2(1)  | 8(1)  | -4(1)  |
| C(59) | 22(1) | 15(1) | 21(1) | -1(1)  | 8(1)  | 0(1)   |
| C(60) | 26(1) | 27(1) | 29(1) | 4(1)   | 14(1) | 2(1)   |
| C(61) | 24(1) | 34(1) | 36(1) | 5(1)   | 11(1) | -1(1)  |
| C(62) | 25(1) | 27(1) | 29(1) | -2(1)  | 4(1)  | -1(1)  |
| C(63) | 35(1) | 46(1) | 22(1) | 4(1)   | 10(1) | -3(1)  |
| C(64) | 26(1) | 36(1) | 25(1) | 2(1)   | 12(1) | -4(1)  |
| C(65) | 20(1) | 18(1) | 26(1) | 0(1)   | 11(1) | 1(1)   |
| C(66) | 25(1) | 21(1) | 29(1) | -3(1)  | 11(1) | -2(1)  |
| C(67) | 28(1) | 26(1) | 40(1) | 2(1)   | 20(1) | -5(1)  |
| C(68) | 25(1) | 31(1) | 44(1) | 1(1)   | 23(1) | 4(1)   |

|        |       |       |       |        |       |        |
|--------|-------|-------|-------|--------|-------|--------|
| C(69)  | 33(1) | 20(1) | 44(1) | -4(1)  | 24(1) | 1(1)   |
| C(70)  | 27(1) | 18(1) | 38(1) | -2(1)  | 18(1) | -3(1)  |
| C(71)  | 29(1) | 17(1) | 24(1) | -2(1)  | 13(1) | 0(1)   |
| C(72)  | 27(1) | 22(1) | 26(1) | -1(1)  | 13(1) | -2(1)  |
| C(73)  | 27(1) | 25(1) | 30(1) | -4(1)  | 13(1) | -1(1)  |
| C(74)  | 32(1) | 29(1) | 46(1) | 0(1)   | 23(1) | 1(1)   |
| C(75)  | 24(1) | 31(1) | 49(1) | 6(1)   | 17(1) | 0(1)   |
| C(76)  | 30(1) | 32(1) | 41(1) | -8(1)  | 11(1) | -9(1)  |
| C(77)  | 29(1) | 24(1) | 42(1) | -3(1)  | 16(1) | 0(1)   |
| C(78)  | 30(1) | 20(1) | 27(1) | -1(1)  | 16(1) | 0(1)   |
| C(79)  | 26(1) | 18(1) | 29(1) | 6(1)   | 13(1) | 2(1)   |
| C(80)  | 39(1) | 32(1) | 28(1) | -3(1)  | 18(1) | 0(1)   |
| C(81)  | 62(2) | 45(2) | 25(1) | 1(1)   | 14(1) | 3(1)   |
| C(82)  | 28(1) | 22(1) | 33(1) | 0(1)   | 19(1) | 0(1)   |
| C(83)  | 40(1) | 28(1) | 44(1) | 5(1)   | 28(1) | -1(1)  |
| C(84)  | 42(1) | 28(1) | 66(2) | 3(1)   | 37(1) | -3(1)  |
| C(85)  | 43(1) | 32(1) | 69(2) | 4(1)   | 43(1) | 4(1)   |
| C(86)  | 34(1) | 27(1) | 63(2) | 4(1)   | 32(1) | 3(1)   |
| C(87)  | 37(1) | 21(1) | 52(1) | 1(1)   | 30(1) | 0(1)   |
| P(4)   | 17(1) | 15(1) | 25(1) | 1(1)   | 9(1)  | 1(1)   |
| O(4)   | 25(1) | 16(1) | 32(1) | 3(1)   | 14(1) | 3(1)   |
| N(4)   | 18(1) | 15(1) | 30(1) | -1(1)  | 12(1) | -1(1)  |
| C(88)  | 25(1) | 17(1) | 29(1) | 3(1)   | 14(1) | 2(1)   |
| C(89)  | 25(1) | 25(1) | 32(1) | 1(1)   | 13(1) | 1(1)   |
| C(90)  | 41(1) | 26(1) | 31(1) | -2(1)  | 15(1) | 1(1)   |
| C(91)  | 50(1) | 32(1) | 38(1) | 0(1)   | 29(1) | 1(1)   |
| C(92)  | 38(1) | 32(1) | 46(1) | -1(1)  | 29(1) | -3(1)  |
| C(93)  | 28(1) | 23(1) | 36(1) | -1(1)  | 18(1) | -2(1)  |
| C(94)  | 18(1) | 19(1) | 27(1) | 2(1)   | 13(1) | -4(1)  |
| C(95)  | 23(1) | 24(1) | 33(1) | 3(1)   | 10(1) | 1(1)   |
| C(96)  | 23(1) | 36(1) | 40(1) | 13(1)  | 12(1) | 4(1)   |
| C(97)  | 24(1) | 49(2) | 33(1) | 5(1)   | 6(1)  | -4(1)  |
| C(98)  | 35(1) | 37(1) | 39(1) | -11(1) | 10(1) | -12(1) |
| C(99)  | 24(1) | 25(1) | 36(1) | -1(1)  | 12(1) | -3(1)  |
| C(100) | 16(1) | 17(1) | 29(1) | -2(1)  | 9(1)  | 2(1)   |
| C(101) | 16(1) | 30(1) | 30(1) | -2(1)  | 8(1)  | -1(1)  |

|        |       |       |       |        |       |       |
|--------|-------|-------|-------|--------|-------|-------|
| C(102) | 21(1) | 36(1) | 30(1) | 1(1)   | 9(1)  | 7(1)  |
| C(103) | 30(1) | 59(2) | 32(1) | 0(1)   | 7(1)  | 17(1) |
| C(104) | 38(1) | 76(2) | 28(1) | -13(1) | -1(1) | 12(1) |
| C(105) | 42(1) | 64(2) | 39(1) | -26(1) | 4(1)  | 9(1)  |
| C(106) | 26(1) | 42(1) | 36(1) | -12(1) | 4(1)  | 3(1)  |
| C(107) | 16(1) | 19(1) | 26(1) | 1(1)   | 8(1)  | -1(1) |
| C(108) | 23(1) | 22(1) | 33(1) | 4(1)   | 10(1) | -2(1) |
| C(109) | 17(1) | 26(1) | 28(1) | 1(1)   | 8(1)  | 2(1)  |
| C(110) | 39(1) | 49(2) | 42(1) | 10(1)  | 25(1) | 13(1) |
| C(111) | 16(1) | 17(1) | 27(1) | 0(1)   | 10(1) | 0(1)  |
| C(112) | 19(1) | 23(1) | 27(1) | 3(1)   | 10(1) | -2(1) |
| C(113) | 21(1) | 32(1) | 30(1) | -4(1)  | 11(1) | -5(1) |
| C(114) | 23(1) | 36(1) | 24(1) | 3(1)   | 8(1)  | 1(1)  |
| C(115) | 24(1) | 32(1) | 28(1) | 8(1)   | 13(1) | 2(1)  |
| C(116) | 19(1) | 23(1) | 28(1) | 3(1)   | 9(1)  | 1(1)  |
| P(5)   | 24(1) | 13(1) | 19(1) | 2(1)   | 10(1) | 1(1)  |
| O(5)   | 28(1) | 14(1) | 24(1) | 2(1)   | 11(1) | 1(1)  |
| N(5)   | 32(1) | 10(1) | 21(1) | 1(1)   | 16(1) | 0(1)  |
| C(117) | 25(1) | 24(1) | 17(1) | 2(1)   | 10(1) | 6(1)  |
| C(118) | 35(1) | 23(1) | 26(1) | -1(1)  | 10(1) | 6(1)  |
| C(119) | 33(1) | 41(1) | 24(1) | -8(1)  | 10(1) | 4(1)  |
| C(120) | 29(1) | 50(2) | 20(1) | 4(1)   | 8(1)  | 2(1)  |
| C(121) | 29(1) | 35(1) | 31(1) | 15(1)  | 11(1) | 3(1)  |
| C(122) | 26(1) | 21(1) | 29(1) | 4(1)   | 13(1) | 2(1)  |
| C(123) | 26(1) | 17(1) | 31(1) | 4(1)   | 14(1) | 2(1)  |
| C(124) | 33(1) | 50(2) | 33(1) | 13(1)  | 19(1) | 9(1)  |
| C(125) | 41(1) | 67(2) | 63(2) | 19(2)  | 37(1) | 13(1) |
| C(126) | 30(1) | 44(2) | 71(2) | 12(1)  | 24(1) | 4(1)  |
| C(127) | 32(1) | 36(1) | 54(2) | -8(1)  | 10(1) | -5(1) |
| C(128) | 33(1) | 31(1) | 36(1) | -8(1)  | 15(1) | -3(1) |
| C(129) | 27(1) | 18(1) | 21(1) | 0(1)   | 12(1) | -2(1) |
| C(130) | 26(1) | 20(1) | 21(1) | 0(1)   | 12(1) | 1(1)  |
| C(131) | 33(1) | 21(1) | 24(1) | -1(1)  | 13(1) | -2(1) |
| C(132) | 32(1) | 29(1) | 26(1) | -9(1)  | 8(1)  | -2(1) |
| C(133) | 27(1) | 48(1) | 20(1) | -3(1)  | 8(1)  | 6(1)  |
| C(134) | 38(1) | 53(2) | 24(1) | 13(1)  | 15(1) | 4(1)  |

|        |       |       |       |        |       |        |
|--------|-------|-------|-------|--------|-------|--------|
| C(135) | 31(1) | 32(1) | 28(1) | 7(1)   | 14(1) | -4(1)  |
| C(136) | 24(1) | 26(1) | 24(1) | -1(1)  | 12(1) | -2(1)  |
| C(137) | 33(1) | 27(1) | 34(1) | -8(1)  | 15(1) | 4(1)   |
| C(138) | 28(1) | 48(1) | 29(1) | -1(1)  | 14(1) | -8(1)  |
| C(139) | 46(2) | 86(2) | 45(2) | -4(2)  | 31(1) | -6(1)  |
| C(140) | 25(1) | 26(1) | 24(1) | 0(1)   | 9(1)  | -1(1)  |
| C(141) | 27(1) | 43(1) | 40(1) | -8(1)  | 5(1)  | 7(1)   |
| C(142) | 40(1) | 48(2) | 44(2) | -3(1)  | 0(1)  | 14(1)  |
| C(143) | 35(1) | 46(2) | 34(1) | -3(1)  | 0(1)  | -1(1)  |
| C(144) | 36(1) | 31(1) | 30(1) | -4(1)  | 8(1)  | -7(1)  |
| C(145) | 28(1) | 24(1) | 26(1) | -1(1)  | 11(1) | -4(1)  |
| P(6)   | 30(1) | 15(1) | 18(1) | 1(1)   | 11(1) | 3(1)   |
| O(6)   | 41(1) | 16(1) | 29(1) | 1(1)   | 17(1) | 4(1)   |
| N(6)   | 31(1) | 15(1) | 20(1) | 4(1)   | 13(1) | 5(1)   |
| C(146) | 33(1) | 16(1) | 20(1) | 1(1)   | 14(1) | 7(1)   |
| C(147) | 35(1) | 22(1) | 26(1) | -3(1)  | 14(1) | -5(1)  |
| C(148) | 40(1) | 26(1) | 21(1) | -3(1)  | 10(1) | 0(1)   |
| C(149) | 50(1) | 34(1) | 26(1) | 2(1)   | 21(1) | 0(1)   |
| C(150) | 45(1) | 51(2) | 36(1) | 4(1)   | 23(1) | -10(1) |
| C(151) | 32(1) | 46(2) | 29(1) | 2(1)   | 14(1) | -2(1)  |
| C(152) | 29(1) | 25(1) | 20(1) | 0(1)   | 9(1)  | 5(1)   |
| C(153) | 42(1) | 26(1) | 28(1) | 1(1)   | 9(1)  | 12(1)  |
| C(154) | 43(1) | 43(2) | 41(1) | -2(1)  | 0(1)  | 22(1)  |
| C(155) | 31(1) | 55(2) | 54(2) | -15(1) | -3(1) | 6(1)   |
| C(156) | 37(1) | 31(1) | 46(1) | -6(1)  | 6(1)  | -1(1)  |
| C(157) | 31(1) | 22(1) | 31(1) | 3(1)   | 8(1)  | 5(1)   |
| C(158) | 38(1) | 13(1) | 24(1) | 2(1)   | 18(1) | -2(1)  |
| C(159) | 35(1) | 24(1) | 22(1) | 6(1)   | 16(1) | 8(1)   |
| C(160) | 32(1) | 31(1) | 23(1) | 2(1)   | 15(1) | 3(1)   |
| C(161) | 32(1) | 51(2) | 26(1) | -10(1) | 13(1) | -1(1)  |
| C(162) | 42(1) | 75(2) | 17(1) | 8(1)   | 12(1) | 26(1)  |
| C(163) | 60(2) | 45(2) | 33(1) | 18(1)  | 30(1) | 26(1)  |
| C(164) | 56(1) | 28(1) | 32(1) | 10(1)  | 30(1) | 13(1)  |
| C(165) | 34(1) | 22(1) | 25(1) | -2(1)  | 16(1) | -7(1)  |
| C(166) | 27(1) | 28(1) | 25(1) | -2(1)  | 12(1) | 0(1)   |
| C(167) | 43(1) | 32(1) | 38(1) | -2(1)  | 22(1) | -11(1) |

|        |       |       |       |        |       |        |
|--------|-------|-------|-------|--------|-------|--------|
| C(168) | 69(2) | 52(2) | 57(2) | -5(1)  | 43(2) | -22(1) |
| C(169) | 36(1) | 30(1) | 25(1) | -2(1)  | 12(1) | -9(1)  |
| C(170) | 36(1) | 56(2) | 41(1) | -12(1) | 11(1) | -12(1) |
| C(171) | 37(1) | 83(2) | 38(2) | -11(2) | 5(1)  | -12(1) |
| C(172) | 56(2) | 82(2) | 35(1) | -17(2) | 12(1) | -29(2) |
| C(173) | 64(2) | 52(2) | 33(1) | -12(1) | 22(1) | -22(1) |
| C(174) | 55(2) | 36(1) | 33(1) | -12(1) | 22(1) | -18(1) |

**Table 5. Hydrogen coordinates (  $\times 10^4$ ) and isotropic displacement parameters ( $\text{\AA}^2 \times 10^3$ ) for  $\text{C}_{29}\text{H}_{34}\text{NOP}$  (13)**

|        | x     | y    | z     | U(eq) |
|--------|-------|------|-------|-------|
| H(1N)  | 55    | 1812 | 508   | 25    |
| H(2A)  | 915   | 3656 | -62   | 32    |
| H(3A)  | 1925  | 3591 | -105  | 41    |
| H(4A)  | 2410  | 2593 | -70   | 40    |
| H(5A)  | 1903  | 1644 | 32    | 38    |
| H(6A)  | 897   | 1701 | 89    | 32    |
| H(8A)  | -41   | 2485 | -1245 | 31    |
| H(9A)  | -927  | 2321 | -2324 | 36    |
| H(10A) | -2036 | 2248 | -2519 | 37    |
| H(11A) | -2266 | 2323 | -1635 | 35    |
| H(12A) | -1390 | 2491 | -561  | 29    |
| H(13A) | 90    | 2916 | 1208  | 25    |
| H(15A) | -985  | 1514 | 563   | 35    |
| H(16A) | -2109 | 1489 | 330   | 42    |
| H(17A) | -2560 | 2339 | 656   | 42    |
| H(18A) | -1878 | 3226 | 1213  | 40    |
| H(19A) | -754  | 3263 | 1436  | 31    |
| H(21A) | -113  | 1369 | 1796  | 42    |
| H(21B) | 674   | 1203 | 2250  | 42    |
| H(21C) | 335   | 1172 | 1458  | 42    |
| H(22A) | 587   | 2945 | 2385  | 34    |



|        |       |       |       |    |
|--------|-------|-------|-------|----|
| H(23A) | 320   | 1814  | 2873  | 51 |
| H(23B) | 409   | 2547  | 3185  | 51 |
| H(24A) | 1212  | 1909  | 1490  | 35 |
| H(25A) | 1831  | 2106  | 2899  | 52 |
| H(25B) | 1684  | 1411  | 2547  | 52 |
| H(26A) | 2836  | 1711  | 2963  | 65 |
| H(26B) | 2467  | 1613  | 2174  | 65 |
| H(27A) | 3114  | 2558  | 2437  | 59 |
| H(27B) | 2755  | 2837  | 2838  | 59 |
| H(28A) | 2093  | 2634  | 1426  | 48 |
| H(28B) | 2252  | 3327  | 1781  | 48 |
| H(29A) | 1091  | 3050  | 1378  | 36 |
| H(29B) | 1470  | 3128  | 2170  | 36 |
| H(2N)  | 9921  | 9442  | 9713  | 26 |
| H(31A) | 11246 | 8955  | 10768 | 36 |
| H(32A) | 12379 | 8675  | 11386 | 51 |
| H(33A) | 13180 | 9464  | 12000 | 77 |
| H(34A) | 12856 | 10532 | 11947 | 88 |
| H(35A) | 11716 | 10829 | 11327 | 58 |
| H(37A) | 10775 | 9134  | 11551 | 35 |
| H(38A) | 10129 | 8693  | 11995 | 42 |
| H(39A) | 9030  | 9054  | 11633 | 39 |
| H(40A) | 8576  | 9875  | 10846 | 33 |
| H(41A) | 9214  | 10317 | 10395 | 30 |
| H(42A) | 10057 | 10646 | 9300  | 25 |
| H(44A) | 10795 | 11039 | 8922  | 38 |
| H(45A) | 11844 | 10984 | 8964  | 50 |
| H(46A) | 12487 | 10040 | 9325  | 52 |
| H(47A) | 12054 | 9135  | 9602  | 43 |
| H(48A) | 10988 | 9181  | 9530  | 32 |
| H(50A) | 9966  | 9297  | 8297  | 36 |
| H(50B) | 9162  | 9193  | 7930  | 36 |
| H(50C) | 9614  | 9003  | 8697  | 36 |
| H(51A) | 9381  | 10927 | 8145  | 32 |
| H(52A) | 9387  | 9934  | 7330  | 45 |
| H(52B) | 9325  | 10715 | 7170  | 45 |

|        |      |       |       |    |
|--------|------|-------|-------|----|
| H(53A) | 8865 | 9669  | 8950  | 30 |
| H(54A) | 8114 | 10217 | 7647  | 41 |
| H(54B) | 8214 | 9457  | 7801  | 41 |
| H(55A) | 7135 | 9800  | 7631  | 51 |
| H(55B) | 7580 | 9512  | 8364  | 51 |
| H(56A) | 7072 | 10477 | 8440  | 51 |
| H(56B) | 7378 | 10864 | 8042  | 51 |
| H(57A) | 8061 | 11075 | 9188  | 42 |
| H(57B) | 8167 | 10316 | 9346  | 42 |
| H(58A) | 9141 | 10741 | 9357  | 32 |
| H(58B) | 8692 | 11021 | 8621  | 32 |
| H(3N)  | 5035 | 2062  | 9622  | 23 |
| H(60A) | 6176 | 1480  | 10266 | 32 |
| H(61A) | 7236 | 1464  | 11227 | 39 |
| H(62A) | 7326 | 1178  | 12243 | 37 |
| H(63A) | 6363 | 900   | 12305 | 43 |
| H(64A) | 5305 | 908   | 11358 | 35 |
| H(66A) | 3822 | 411   | 10127 | 31 |
| H(67A) | 3117 | 608   | 10586 | 36 |
| H(68A) | 3122 | 1621  | 11037 | 37 |
| H(69A) | 3800 | 2453  | 10984 | 36 |
| H(70A) | 4497 | 2262  | 10522 | 32 |
| H(71A) | 4510 | 1161  | 8650  | 28 |
| H(73A) | 3610 | 2300  | 9110  | 34 |
| H(74A) | 2448 | 2292  | 8715  | 41 |
| H(75A) | 1747 | 1566  | 7874  | 42 |
| H(76A) | 2242 | 833   | 7469  | 44 |
| H(77A) | 3414 | 833   | 7882  | 38 |
| H(79A) | 3788 | 2728  | 8133  | 36 |
| H(79B) | 4393 | 3054  | 8063  | 36 |
| H(79C) | 4477 | 2924  | 8784  | 36 |
| H(80A) | 4406 | 1387  | 7615  | 39 |
| H(81A) | 3743 | 2536  | 7073  | 57 |
| H(81B) | 3739 | 1874  | 6675  | 57 |
| H(82A) | 5539 | 2333  | 9110  | 31 |
| H(83A) | 5437 | 2429  | 7823  | 41 |

|        |      |       |       |    |
|--------|------|-------|-------|----|
| H(83B) | 5386 | 3032  | 8235  | 41 |
| H(84A) | 6513 | 2884  | 9063  | 49 |
| H(84B) | 6491 | 2950  | 8361  | 49 |
| H(85A) | 6608 | 1827  | 8307  | 50 |
| H(85B) | 7213 | 2085  | 8999  | 50 |
| H(86A) | 6641 | 1741  | 9565  | 46 |
| H(86B) | 6704 | 1139  | 9160  | 46 |
| H(87A) | 5574 | 1296  | 8307  | 40 |
| H(87B) | 5585 | 1200  | 9002  | 40 |
| H(4N)  | 5189 | 9544  | 9926  | 25 |
| H(89A) | 5427 | 9325  | 11016 | 33 |
| H(90A) | 5292 | 9730  | 11892 | 41 |
| H(91A) | 4242 | 9676  | 11845 | 44 |
| H(92A) | 3310 | 9231  | 10916 | 42 |
| H(93A) | 3441 | 8824  | 10047 | 34 |
| H(95A) | 3606 | 9665  | 9074  | 33 |
| H(96A) | 2566 | 9701  | 8107  | 41 |
| H(97A) | 2095 | 8761  | 7495  | 47 |
| H(98A) | 2666 | 7775  | 7863  | 49 |
| H(99A) | 3703 | 7729  | 8834  | 35 |
| H(10B) | 5557 | 8468  | 9477  | 25 |
| H(10C) | 4567 | 9857  | 8602  | 36 |
| H(10D) | 3914 | 9936  | 7450  | 53 |
| H(10E) | 3916 | 9098  | 6776  | 66 |
| H(10F) | 4601 | 8197  | 7250  | 66 |
| H(10G) | 5255 | 8110  | 8405  | 47 |
| H(10H) | 6463 | 10200 | 9506  | 41 |
| H(10I) | 5759 | 10217 | 9514  | 41 |
| H(10J) | 5781 | 9972  | 8866  | 41 |
| H(10K) | 6700 | 8495  | 9573  | 29 |
| H(11B) | 6542 | 9444  | 8667  | 49 |
| H(11C) | 6939 | 8748  | 8788  | 49 |
| H(11E) | 6274 | 9607  | 10536 | 24 |
| H(11F) | 7518 | 9372  | 10518 | 29 |
| H(11G) | 7188 | 10072 | 10458 | 29 |
| H(11H) | 8069 | 9885  | 11567 | 34 |

|        |       |      |       |    |
|--------|-------|------|-------|----|
| H(11I) | 7358  | 9989 | 11553 | 34 |
| H(11J) | 7973  | 8751 | 11632 | 35 |
| H(11K) | 7916  | 9088 | 12230 | 35 |
| H(11L) | 6724  | 9004 | 11634 | 33 |
| H(11M) | 7047  | 8300 | 11698 | 33 |
| H(11N) | 6871  | 8368 | 10599 | 29 |
| H(11O) | 6164  | 8479 | 10589 | 29 |
| H(5N)  | 9630  | 2781 | 5191  | 24 |
| H(11P) | 9295  | 940  | 3837  | 37 |
| H(11Q) | 8703  | 1036 | 2684  | 41 |
| H(12B) | 8444  | 2050 | 2185  | 42 |
| H(12C) | 8778  | 2979 | 2842  | 40 |
| H(12D) | 9367  | 2897 | 3996  | 30 |
| H(12E) | 10660 | 1904 | 4249  | 45 |
| H(12F) | 11801 | 2070 | 4597  | 63 |
| H(12G) | 12554 | 2298 | 5710  | 59 |
| H(12H) | 12168 | 2332 | 6480  | 54 |
| H(12I) | 11025 | 2187 | 6137  | 42 |
| H(12J) | 9235  | 1713 | 5647  | 26 |
| H(13B) | 10198 | 3172 | 6317  | 32 |
| H(13C) | 10949 | 3335 | 7443  | 38 |
| H(13D) | 11018 | 2590 | 8230  | 40 |
| H(13E) | 10368 | 1648 | 7885  | 46 |
| H(13F) | 9617  | 1479 | 6760  | 37 |
| H(13G) | 8976  | 3288 | 6129  | 48 |
| H(13H) | 8242  | 3428 | 5512  | 48 |
| H(13I) | 8897  | 3451 | 5416  | 48 |
| H(13J) | 8262  | 1689 | 5778  | 41 |
| H(13K) | 8058  | 2849 | 6267  | 66 |
| H(13L) | 7859  | 2118 | 6399  | 66 |
| H(14A) | 8366  | 2669 | 4485  | 32 |
| H(14B) | 7194  | 2514 | 4647  | 50 |
| H(14C) | 7488  | 3198 | 4581  | 50 |
| H(14D) | 7235  | 2954 | 3489  | 63 |
| H(14E) | 6561  | 2885 | 3550  | 63 |
| H(14F) | 6666  | 1748 | 3606  | 55 |

|        |       |       |      |    |
|--------|-------|-------|------|----|
| H(14G) | 6684  | 1992  | 2953 | 55 |
| H(14H) | 7876  | 1918  | 3503 | 43 |
| H(14I) | 7576  | 1233  | 3561 | 43 |
| H(14J) | 8494  | 1530  | 4608 | 32 |
| H(14K) | 7811  | 1483  | 4656 | 32 |
| H(6N)  | 9460  | 10116 | 4844 | 26 |
| H(14L) | 9180  | 9395  | 3630 | 34 |
| H(14M) | 9023  | 9733  | 2603 | 37 |
| H(14N) | 9881  | 10278 | 2520 | 43 |
| H(15B) | 10900 | 10507 | 3476 | 51 |
| H(15C) | 11077 | 10140 | 4510 | 43 |
| H(15D) | 11481 | 8737  | 5822 | 43 |
| H(15E) | 12574 | 9069  | 6595 | 62 |
| H(15F) | 12825 | 10157 | 6797 | 68 |
| H(15G) | 11989 | 10936 | 6253 | 53 |
| H(15H) | 10887 | 10618 | 5492 | 37 |
| H(15I) | 9400  | 8945  | 5366 | 29 |
| H(16B) | 10197 | 10428 | 6187 | 34 |
| H(16C) | 10965 | 10506 | 7324 | 44 |
| H(16D) | 11161 | 9617  | 8017 | 55 |
| H(16E) | 10582 | 8656  | 7581 | 51 |
| H(16F) | 9819  | 8571  | 6454 | 42 |
| H(16G) | 8969  | 10304 | 6023 | 40 |
| H(16H) | 8213  | 10411 | 5431 | 40 |
| H(16I) | 8845  | 10599 | 5331 | 40 |
| H(16J) | 8431  | 8681  | 5483 | 44 |
| H(16K) | 8249  | 9648  | 6211 | 65 |
| H(16L) | 8112  | 8868  | 6230 | 65 |
| H(16N) | 8367  | 9936  | 4322 | 39 |
| H(17B) | 7445  | 10181 | 4489 | 57 |
| H(17C) | 7288  | 9427  | 4500 | 57 |
| H(17D) | 6532  | 9843  | 3441 | 70 |
| H(17E) | 7149  | 10120 | 3357 | 70 |
| H(17F) | 6865  | 8769  | 3399 | 74 |
| H(17G) | 6777  | 9146  | 2753 | 74 |
| H(17H) | 7809  | 8554  | 3250 | 61 |

|        |      |      |      |    |
|--------|------|------|------|----|
| H(17I) | 7955 | 9313 | 3255 | 61 |
| H(17J) | 8701 | 8865 | 4297 | 49 |
| H(17K) | 8074 | 8599 | 4370 | 49 |

**Table 6. Torsion angles [°] for C<sub>29</sub>H<sub>34</sub>NOP (13)**

|                        |             |
|------------------------|-------------|
| O(1)-P(1)-N(1)-C(13)   | -5.86(17)   |
| C(1)-P(1)-N(1)-C(13)   | 117.80(15)  |
| C(7)-P(1)-N(1)-C(13)   | -127.98(15) |
| O(1)-P(1)-C(1)-C(2)    | -17.79(19)  |
| N(1)-P(1)-C(1)-C(2)    | -141.16(16) |
| C(7)-P(1)-C(1)-C(2)    | 102.50(17)  |
| O(1)-P(1)-C(1)-C(6)    | 164.56(15)  |
| N(1)-P(1)-C(1)-C(6)    | 41.19(18)   |
| C(7)-P(1)-C(1)-C(6)    | -75.15(18)  |
| C(6)-C(1)-C(2)-C(3)    | -0.4(3)     |
| P(1)-C(1)-C(2)-C(3)    | -178.03(16) |
| C(1)-C(2)-C(3)-C(4)    | 0.7(3)      |
| C(2)-C(3)-C(4)-C(5)    | -0.7(3)     |
| C(3)-C(4)-C(5)-C(6)    | 0.3(3)      |
| C(4)-C(5)-C(6)-C(1)    | 0.1(3)      |
| C(2)-C(1)-C(6)-C(5)    | 0.0(3)      |
| P(1)-C(1)-C(6)-C(5)    | 177.62(16)  |
| O(1)-P(1)-C(7)-C(8)    | 107.14(17)  |
| N(1)-P(1)-C(7)-C(8)    | -130.38(17) |
| C(1)-P(1)-C(7)-C(8)    | -13.84(19)  |
| O(1)-P(1)-C(7)-C(12)   | -63.94(17)  |
| N(1)-P(1)-C(7)-C(12)   | 58.54(17)   |
| C(1)-P(1)-C(7)-C(12)   | 175.08(15)  |
| C(12)-C(7)-C(8)-C(9)   | 0.2(3)      |
| P(1)-C(7)-C(8)-C(9)    | -170.88(16) |
| C(7)-C(8)-C(9)-C(10)   | 0.1(3)      |
| C(8)-C(9)-C(10)-C(11)  | -0.5(3)     |
| C(9)-C(10)-C(11)-C(12) | 0.7(3)      |

|                         |             |
|-------------------------|-------------|
| C(10)-C(11)-C(12)-C(7)  | -0.4(3)     |
| C(8)-C(7)-C(12)-C(11)   | 0.0(3)      |
| P(1)-C(7)-C(12)-C(11)   | 171.42(16)  |
| P(1)-N(1)-C(13)-C(14)   | 97.76(17)   |
| P(1)-N(1)-C(13)-C(20)   | -132.96(15) |
| N(1)-C(13)-C(14)-C(15)  | 41.2(2)     |
| C(20)-C(13)-C(14)-C(15) | -87.6(2)    |
| N(1)-C(13)-C(14)-C(19)  | -135.59(18) |
| C(20)-C(13)-C(14)-C(19) | 95.6(2)     |
| C(19)-C(14)-C(15)-C(16) | 0.0(3)      |
| C(13)-C(14)-C(15)-C(16) | -176.83(19) |
| C(14)-C(15)-C(16)-C(17) | -0.4(3)     |
| C(15)-C(16)-C(17)-C(18) | 0.3(3)      |
| C(16)-C(17)-C(18)-C(19) | 0.2(3)      |
| C(17)-C(18)-C(19)-C(14) | -0.6(3)     |
| C(15)-C(14)-C(19)-C(18) | 0.5(3)      |
| C(13)-C(14)-C(19)-C(18) | 177.42(18)  |
| N(1)-C(13)-C(20)-C(22)  | 167.21(16)  |
| C(14)-C(13)-C(20)-C(22) | -65.4(2)    |
| N(1)-C(13)-C(20)-C(21)  | -71.3(2)    |
| C(14)-C(13)-C(20)-C(21) | 56.0(2)     |
| N(1)-C(13)-C(20)-C(24)  | 49.1(2)     |
| C(14)-C(13)-C(20)-C(24) | 176.52(15)  |
| C(21)-C(20)-C(22)-C(23) | 3.6(3)      |
| C(13)-C(20)-C(22)-C(23) | 124.4(3)    |
| C(24)-C(20)-C(22)-C(23) | -118.4(3)   |
| C(22)-C(20)-C(24)-C(29) | -61.6(2)    |
| C(21)-C(20)-C(24)-C(29) | 175.20(17)  |
| C(13)-C(20)-C(24)-C(29) | 54.1(2)     |
| C(22)-C(20)-C(24)-C(25) | 62.9(2)     |
| C(21)-C(20)-C(24)-C(25) | -60.3(2)    |
| C(13)-C(20)-C(24)-C(25) | 178.63(18)  |
| C(29)-C(24)-C(25)-C(26) | -55.4(3)    |
| C(20)-C(24)-C(25)-C(26) | 176.9(2)    |
| C(24)-C(25)-C(26)-C(27) | 56.4(3)     |
| C(25)-C(26)-C(27)-C(28) | -55.3(3)    |

|                         |             |
|-------------------------|-------------|
| C(26)-C(27)-C(28)-C(29) | 55.5(3)     |
| C(27)-C(28)-C(29)-C(24) | -57.7(3)    |
| C(25)-C(24)-C(29)-C(28) | 56.5(2)     |
| C(20)-C(24)-C(29)-C(28) | -176.81(18) |
| O(2)-P(2)-N(2)-C(42)    | 33.75(17)   |
| C(30)-P(2)-N(2)-C(42)   | -90.82(16)  |
| C(36)-P(2)-N(2)-C(42)   | 155.16(14)  |
| O(2)-P(2)-C(30)-C(31)   | -170.72(16) |
| N(2)-P(2)-C(30)-C(31)   | -46.1(2)    |
| C(36)-P(2)-C(30)-C(31)  | 65.80(19)   |
| O(2)-P(2)-C(30)-C(35)   | 10.1(2)     |
| N(2)-P(2)-C(30)-C(35)   | 134.69(19)  |
| C(36)-P(2)-C(30)-C(35)  | -113.4(2)   |
| C(35)-C(30)-C(31)-C(32) | 0.6(3)      |
| P(2)-C(30)-C(31)-C(32)  | -178.56(18) |
| C(30)-C(31)-C(32)-C(33) | 0.6(4)      |
| C(31)-C(32)-C(33)-C(34) | -1.8(5)     |
| C(32)-C(33)-C(34)-C(35) | 1.8(6)      |
| C(33)-C(34)-C(35)-C(30) | -0.6(5)     |
| C(31)-C(30)-C(35)-C(34) | -0.6(4)     |
| P(2)-C(30)-C(35)-C(34)  | 178.6(2)    |
| O(2)-P(2)-C(36)-C(37)   | -134.23(18) |
| N(2)-P(2)-C(36)-C(37)   | 105.46(19)  |
| C(30)-P(2)-C(36)-C(37)  | -11.8(2)    |
| O(2)-P(2)-C(36)-C(41)   | 45.76(17)   |
| N(2)-P(2)-C(36)-C(41)   | -74.55(16)  |
| C(30)-P(2)-C(36)-C(41)  | 168.22(15)  |
| C(41)-C(36)-C(37)-C(38) | 0.9(3)      |
| P(2)-C(36)-C(37)-C(38)  | -179.15(17) |
| C(36)-C(37)-C(38)-C(39) | -0.1(3)     |
| C(37)-C(38)-C(39)-C(40) | -0.8(3)     |
| C(38)-C(39)-C(40)-C(41) | 0.9(3)      |
| C(39)-C(40)-C(41)-C(36) | -0.2(3)     |
| C(37)-C(36)-C(41)-C(40) | -0.7(3)     |
| P(2)-C(36)-C(41)-C(40)  | 179.30(15)  |
| P(2)-N(2)-C(42)-C(43)   | 79.29(18)   |



|                         |             |
|-------------------------|-------------|
| P(2)-N(2)-C(42)-C(49)   | -151.37(13) |
| N(2)-C(42)-C(43)-C(48)  | 35.6(2)     |
| C(49)-C(42)-C(43)-C(48) | -91.7(2)    |
| N(2)-C(42)-C(43)-C(44)  | -140.93(18) |
| C(49)-C(42)-C(43)-C(44) | 91.8(2)     |
| C(48)-C(43)-C(44)-C(45) | 0.0(3)      |
| C(42)-C(43)-C(44)-C(45) | 176.59(19)  |
| C(43)-C(44)-C(45)-C(46) | -1.1(3)     |
| C(44)-C(45)-C(46)-C(47) | 1.3(3)      |
| C(45)-C(46)-C(47)-C(48) | -0.4(3)     |
| C(44)-C(43)-C(48)-C(47) | 1.0(3)      |
| C(42)-C(43)-C(48)-C(47) | -175.56(18) |
| C(46)-C(47)-C(48)-C(43) | -0.8(3)     |
| N(2)-C(42)-C(49)-C(51)  | 165.82(16)  |
| C(43)-C(42)-C(49)-C(51) | -66.4(2)    |
| N(2)-C(42)-C(49)-C(50)  | -72.92(19)  |
| C(43)-C(42)-C(49)-C(50) | 54.9(2)     |
| N(2)-C(42)-C(49)-C(53)  | 47.5(2)     |
| C(43)-C(42)-C(49)-C(53) | 175.28(16)  |
| C(50)-C(49)-C(51)-C(52) | 5.0(3)      |
| C(42)-C(49)-C(51)-C(52) | 124.9(2)    |
| C(53)-C(49)-C(51)-C(52) | -116.2(2)   |
| C(51)-C(49)-C(53)-C(54) | 59.0(2)     |
| C(50)-C(49)-C(53)-C(54) | -63.2(2)    |
| C(42)-C(49)-C(53)-C(54) | 176.68(17)  |
| C(51)-C(49)-C(53)-C(58) | -65.4(2)    |
| C(50)-C(49)-C(53)-C(58) | 172.33(17)  |
| C(42)-C(49)-C(53)-C(58) | 52.2(2)     |
| C(58)-C(53)-C(54)-C(55) | -55.8(2)    |
| C(49)-C(53)-C(54)-C(55) | 177.10(19)  |
| C(53)-C(54)-C(55)-C(56) | 56.8(3)     |
| C(54)-C(55)-C(56)-C(57) | -55.6(3)    |
| C(55)-C(56)-C(57)-C(58) | 55.9(3)     |
| C(56)-C(57)-C(58)-C(53) | -57.2(2)    |
| C(54)-C(53)-C(58)-C(57) | 56.0(2)     |
| C(49)-C(53)-C(58)-C(57) | -177.83(17) |

|                         |             |
|-------------------------|-------------|
| O(3)-P(3)-N(3)-C(71)    | 27.24(16)   |
| C(59)-P(3)-N(3)-C(71)   | 150.96(14)  |
| C(65)-P(3)-N(3)-C(71)   | -97.50(15)  |
| O(3)-P(3)-C(59)-C(60)   | 86.49(18)   |
| N(3)-P(3)-C(59)-C(60)   | -36.06(18)  |
| C(65)-P(3)-C(59)-C(60)  | -153.49(16) |
| O(3)-P(3)-C(59)-C(64)   | -86.94(17)  |
| N(3)-P(3)-C(59)-C(64)   | 150.50(16)  |
| C(65)-P(3)-C(59)-C(64)  | 33.08(18)   |
| C(64)-C(59)-C(60)-C(61) | -0.8(3)     |
| P(3)-C(59)-C(60)-C(61)  | -174.27(17) |
| C(59)-C(60)-C(61)-C(62) | 0.2(3)      |
| C(60)-C(61)-C(62)-C(63) | 0.3(3)      |
| C(61)-C(62)-C(63)-C(64) | -0.2(4)     |
| C(62)-C(63)-C(64)-C(59) | -0.4(4)     |
| C(60)-C(59)-C(64)-C(63) | 0.9(3)      |
| P(3)-C(59)-C(64)-C(63)  | 174.52(18)  |
| O(3)-P(3)-C(65)-C(66)   | 10.76(19)   |
| N(3)-P(3)-C(65)-C(66)   | 135.73(16)  |
| C(59)-P(3)-C(65)-C(66)  | -110.82(17) |
| O(3)-P(3)-C(65)-C(70)   | -174.08(15) |
| N(3)-P(3)-C(65)-C(70)   | -49.11(18)  |
| C(59)-P(3)-C(65)-C(70)  | 64.35(18)   |
| C(70)-C(65)-C(66)-C(67) | 0.0(3)      |
| P(3)-C(65)-C(66)-C(67)  | 175.28(16)  |
| C(65)-C(66)-C(67)-C(68) | -0.8(3)     |
| C(66)-C(67)-C(68)-C(69) | 1.4(3)      |
| C(67)-C(68)-C(69)-C(70) | -1.2(3)     |
| C(68)-C(69)-C(70)-C(65) | 0.4(3)      |
| C(66)-C(65)-C(70)-C(69) | 0.2(3)      |
| P(3)-C(65)-C(70)-C(69)  | -175.01(17) |
| P(3)-N(3)-C(71)-C(72)   | 66.48(19)   |
| P(3)-N(3)-C(71)-C(78)   | -165.79(13) |
| N(3)-C(71)-C(72)-C(77)  | -139.0(2)   |
| C(78)-C(71)-C(72)-C(77) | 93.5(2)     |
| N(3)-C(71)-C(72)-C(73)  | 39.8(3)     |

|                         |             |
|-------------------------|-------------|
| C(78)-C(71)-C(72)-C(73) | -87.7(2)    |
| C(77)-C(72)-C(73)-C(74) | -3.4(3)     |
| C(71)-C(72)-C(73)-C(74) | 177.75(19)  |
| C(72)-C(73)-C(74)-C(75) | 0.8(3)      |
| C(73)-C(74)-C(75)-C(76) | 1.4(4)      |
| C(74)-C(75)-C(76)-C(77) | -0.8(4)     |
| C(73)-C(72)-C(77)-C(76) | 3.9(3)      |
| C(71)-C(72)-C(77)-C(76) | -177.2(2)   |
| C(75)-C(76)-C(77)-C(72) | -1.9(4)     |
| N(3)-C(71)-C(78)-C(80)  | 163.30(16)  |
| C(72)-C(71)-C(78)-C(80) | -68.8(2)    |
| N(3)-C(71)-C(78)-C(79)  | -75.3(2)    |
| C(72)-C(71)-C(78)-C(79) | 52.6(2)     |
| N(3)-C(71)-C(78)-C(82)  | 45.8(2)     |
| C(72)-C(71)-C(78)-C(82) | 173.65(16)  |
| C(79)-C(78)-C(80)-C(81) | 6.1(3)      |
| C(71)-C(78)-C(80)-C(81) | 127.4(3)    |
| C(82)-C(78)-C(80)-C(81) | -114.6(3)   |
| C(80)-C(78)-C(82)-C(87) | -63.3(2)    |
| C(79)-C(78)-C(82)-C(87) | 174.91(18)  |
| C(71)-C(78)-C(82)-C(87) | 52.7(2)     |
| C(80)-C(78)-C(82)-C(83) | 61.9(2)     |
| C(79)-C(78)-C(82)-C(83) | -59.9(2)    |
| C(71)-C(78)-C(82)-C(83) | 177.87(17)  |
| C(87)-C(82)-C(83)-C(84) | -56.2(2)    |
| C(78)-C(82)-C(83)-C(84) | 175.86(18)  |
| C(82)-C(83)-C(84)-C(85) | 56.3(3)     |
| C(83)-C(84)-C(85)-C(86) | -55.3(3)    |
| C(84)-C(85)-C(86)-C(87) | 55.8(3)     |
| C(83)-C(82)-C(87)-C(86) | 57.6(2)     |
| C(78)-C(82)-C(87)-C(86) | -174.83(19) |
| C(85)-C(86)-C(87)-C(82) | -58.5(3)    |
| O(4)-P(4)-N(4)-C(100)   | 42.26(16)   |
| C(94)-P(4)-N(4)-C(100)  | -81.41(15)  |
| C(88)-P(4)-N(4)-C(100)  | 166.05(14)  |
| O(4)-P(4)-C(88)-C(93)   | -93.59(18)  |

|                             |             |
|-----------------------------|-------------|
| N(4)-P(4)-C(88)-C(93)       | 144.69(17)  |
| C(94)-P(4)-C(88)-C(93)      | 28.54(19)   |
| O(4)-P(4)-C(88)-C(89)       | 82.49(18)   |
| N(4)-P(4)-C(88)-C(89)       | -39.23(18)  |
| C(94)-P(4)-C(88)-C(89)      | -155.38(16) |
| C(93)-C(88)-C(89)-C(90)     | 0.7(3)      |
| P(4)-C(88)-C(89)-C(90)      | -175.44(16) |
| C(88)-C(89)-C(90)-C(91)     | -0.2(3)     |
| C(89)-C(90)-C(91)-C(92)     | -0.5(4)     |
| C(90)-C(91)-C(92)-C(93)     | 0.6(4)      |
| C(91)-C(92)-C(93)-C(88)     | -0.1(3)     |
| C(89)-C(88)-C(93)-C(92)     | -0.6(3)     |
| P(4)-C(88)-C(93)-C(92)      | 175.54(17)  |
| O(4)-P(4)-C(94)-C(95)       | -179.96(16) |
| N(4)-P(4)-C(94)-C(95)       | -55.50(18)  |
| C(88)-P(4)-C(94)-C(95)      | 55.08(18)   |
| O(4)-P(4)-C(94)-C(99)       | -2.38(19)   |
| N(4)-P(4)-C(94)-C(99)       | 122.08(16)  |
| C(88)-P(4)-C(94)-C(99)      | -127.34(16) |
| C(99)-C(94)-C(95)-C(96)     | 1.0(3)      |
| P(4)-C(94)-C(95)-C(96)      | 178.64(17)  |
| C(94)-C(95)-C(96)-C(97)     | -0.8(3)     |
| C(95)-C(96)-C(97)-C(98)     | 0.3(4)      |
| C(96)-C(97)-C(98)-C(99)     | -0.1(4)     |
| C(97)-C(98)-C(99)-C(94)     | 0.3(4)      |
| C(95)-C(94)-C(99)-C(98)     | -0.8(3)     |
| P(4)-C(94)-C(99)-C(98)      | -178.40(18) |
| P(4)-N(4)-C(100)-C(101)     | 78.44(18)   |
| P(4)-N(4)-C(100)-C(107)     | -154.70(13) |
| N(4)-C(100)-C(101)-C(102)   | 41.9(3)     |
| C(107)-C(100)-C(101)-C(102) | -84.3(2)    |
| N(4)-C(100)-C(101)-C(106)   | -137.7(2)   |
| C(107)-C(100)-C(101)-C(106) | 96.2(2)     |
| C(106)-C(101)-C(102)-C(103) | -2.5(3)     |
| C(100)-C(101)-C(102)-C(103) | 178.0(2)    |
| C(101)-C(102)-C(103)-C(104) | 1.6(4)      |

|                             |             |
|-----------------------------|-------------|
| C(102)-C(103)-C(104)-C(105) | -0.8(5)     |
| C(103)-C(104)-C(105)-C(106) | 1.0(5)      |
| C(102)-C(101)-C(106)-C(105) | 2.6(4)      |
| C(100)-C(101)-C(106)-C(105) | -177.9(2)   |
| C(104)-C(105)-C(106)-C(101) | -1.9(4)     |
| N(4)-C(100)-C(107)-C(109)   | 163.53(15)  |
| C(101)-C(100)-C(107)-C(109) | -69.60(19)  |
| N(4)-C(100)-C(107)-C(108)   | -75.4(2)    |
| C(101)-C(100)-C(107)-C(108) | 51.5(2)     |
| N(4)-C(100)-C(107)-C(111)   | 44.3(2)     |
| C(101)-C(100)-C(107)-C(111) | 171.17(15)  |
| C(108)-C(107)-C(109)-C(110) | -10.8(3)    |
| C(111)-C(107)-C(109)-C(110) | -131.9(2)   |
| C(100)-C(107)-C(109)-C(110) | 109.3(3)    |
| C(109)-C(107)-C(111)-C(116) | -64.6(2)    |
| C(108)-C(107)-C(111)-C(116) | 172.48(16)  |
| C(100)-C(107)-C(111)-C(116) | 51.9(2)     |
| C(109)-C(107)-C(111)-C(112) | 60.3(2)     |
| C(108)-C(107)-C(111)-C(112) | -62.6(2)    |
| C(100)-C(107)-C(111)-C(112) | 176.82(15)  |
| C(116)-C(111)-C(112)-C(113) | -55.4(2)    |
| C(107)-C(111)-C(112)-C(113) | 177.01(16)  |
| C(111)-C(112)-C(113)-C(114) | 57.2(2)     |
| C(112)-C(113)-C(114)-C(115) | -57.4(2)    |
| C(113)-C(114)-C(115)-C(116) | 57.5(2)     |
| C(112)-C(111)-C(116)-C(115) | 55.4(2)     |
| C(107)-C(111)-C(116)-C(115) | -178.81(15) |
| C(114)-C(115)-C(116)-C(111) | -57.5(2)    |
| O(5)-P(5)-N(5)-C(129)       | -2.62(17)   |
| C(117)-P(5)-N(5)-C(129)     | 120.99(15)  |
| C(123)-P(5)-N(5)-C(129)     | -125.62(15) |
| O(5)-P(5)-C(117)-C(122)     | 164.31(15)  |
| N(5)-P(5)-C(117)-C(122)     | 39.93(19)   |
| C(123)-P(5)-C(117)-C(122)   | -74.52(18)  |
| O(5)-P(5)-C(117)-C(118)     | -16.08(19)  |
| N(5)-P(5)-C(117)-C(118)     | -140.47(16) |

|                             |             |
|-----------------------------|-------------|
| C(123)-P(5)-C(117)-C(118)   | 105.09(17)  |
| C(122)-C(117)-C(118)-C(119) | 0.3(3)      |
| P(5)-C(117)-C(118)-C(119)   | -179.32(17) |
| C(117)-C(118)-C(119)-C(120) | -0.1(3)     |
| C(118)-C(119)-C(120)-C(121) | 0.0(3)      |
| C(119)-C(120)-C(121)-C(122) | -0.1(3)     |
| C(120)-C(121)-C(122)-C(117) | 0.3(3)      |
| C(118)-C(117)-C(122)-C(121) | -0.4(3)     |
| P(5)-C(117)-C(122)-C(121)   | 179.19(16)  |
| O(5)-P(5)-C(123)-C(124)     | 98.62(19)   |
| N(5)-P(5)-C(123)-C(124)     | -138.21(18) |
| C(117)-P(5)-C(123)-C(124)   | -21.9(2)    |
| O(5)-P(5)-C(123)-C(128)     | -74.83(18)  |
| N(5)-P(5)-C(123)-C(128)     | 48.35(18)   |
| C(117)-P(5)-C(123)-C(128)   | 164.69(16)  |
| C(128)-C(123)-C(124)-C(125) | -0.3(4)     |
| P(5)-C(123)-C(124)-C(125)   | -173.8(2)   |
| C(123)-C(124)-C(125)-C(126) | 0.1(4)      |
| C(124)-C(125)-C(126)-C(127) | 0.8(4)      |
| C(125)-C(126)-C(127)-C(128) | -1.5(4)     |
| C(126)-C(127)-C(128)-C(123) | 1.2(4)      |
| C(124)-C(123)-C(128)-C(127) | -0.3(3)     |
| P(5)-C(123)-C(128)-C(127)   | 173.34(19)  |
| P(5)-N(5)-C(129)-C(130)     | 104.68(17)  |
| P(5)-N(5)-C(129)-C(136)     | -127.32(15) |
| N(5)-C(129)-C(130)-C(135)   | -138.55(19) |
| C(136)-C(129)-C(130)-C(135) | 93.4(2)     |
| N(5)-C(129)-C(130)-C(131)   | 40.9(2)     |
| C(136)-C(129)-C(130)-C(131) | -87.2(2)    |
| C(135)-C(130)-C(131)-C(132) | -1.6(3)     |
| C(129)-C(130)-C(131)-C(132) | 178.96(19)  |
| C(130)-C(131)-C(132)-C(133) | 0.0(3)      |
| C(131)-C(132)-C(133)-C(134) | 1.6(3)      |
| C(132)-C(133)-C(134)-C(135) | -1.5(3)     |
| C(131)-C(130)-C(135)-C(134) | 1.7(3)      |
| C(129)-C(130)-C(135)-C(134) | -178.9(2)   |

|                             |             |
|-----------------------------|-------------|
| C(133)-C(134)-C(135)-C(130) | -0.2(4)     |
| N(5)-C(129)-C(136)-C(138)   | 164.53(16)  |
| C(130)-C(129)-C(136)-C(138) | -68.3(2)    |
| N(5)-C(129)-C(136)-C(137)   | -73.7(2)    |
| C(130)-C(129)-C(136)-C(137) | 53.5(2)     |
| N(5)-C(129)-C(136)-C(140)   | 46.2(2)     |
| C(130)-C(129)-C(136)-C(140) | 173.39(16)  |
| C(137)-C(136)-C(138)-C(139) | 6.1(3)      |
| C(129)-C(136)-C(138)-C(139) | 126.8(3)    |
| C(140)-C(136)-C(138)-C(139) | -114.8(3)   |
| C(138)-C(136)-C(140)-C(145) | -60.4(2)    |
| C(137)-C(136)-C(140)-C(145) | 176.98(18)  |
| C(129)-C(136)-C(140)-C(145) | 56.3(2)     |
| C(138)-C(136)-C(140)-C(141) | 63.8(2)     |
| C(137)-C(136)-C(140)-C(141) | -58.9(2)    |
| C(129)-C(136)-C(140)-C(141) | -179.54(18) |
| C(145)-C(140)-C(141)-C(142) | -56.5(3)    |
| C(136)-C(140)-C(141)-C(142) | 176.3(2)    |
| C(140)-C(141)-C(142)-C(143) | 57.0(3)     |
| C(141)-C(142)-C(143)-C(144) | -55.4(3)    |
| C(142)-C(143)-C(144)-C(145) | 56.0(3)     |
| C(143)-C(144)-C(145)-C(140) | -58.7(2)    |
| C(141)-C(140)-C(145)-C(144) | 57.3(2)     |
| C(136)-C(140)-C(145)-C(144) | -176.22(17) |
| O(6)-P(6)-N(6)-C(158)       | 35.89(16)   |
| C(152)-P(6)-N(6)-C(158)     | -88.97(16)  |
| C(146)-P(6)-N(6)-C(158)     | 157.59(14)  |
| O(6)-P(6)-C(146)-C(151)     | -116.69(19) |
| N(6)-P(6)-C(146)-C(151)     | 122.87(18)  |
| C(152)-P(6)-C(146)-C(151)   | 4.5(2)      |
| O(6)-P(6)-C(146)-C(147)     | 59.19(18)   |
| N(6)-P(6)-C(146)-C(147)     | -61.25(17)  |
| C(152)-P(6)-C(146)-C(147)   | -179.66(15) |
| C(151)-C(146)-C(147)-C(148) | 0.5(3)      |
| P(6)-C(146)-C(147)-C(148)   | -175.61(16) |
| C(146)-C(147)-C(148)-C(149) | -0.5(3)     |

|                             |             |
|-----------------------------|-------------|
| C(147)-C(148)-C(149)-C(150) | -0.5(4)     |
| C(148)-C(149)-C(150)-C(151) | 1.6(4)      |
| C(147)-C(146)-C(151)-C(150) | 0.6(3)      |
| P(6)-C(146)-C(151)-C(150)   | 176.43(19)  |
| C(149)-C(150)-C(151)-C(146) | -1.7(4)     |
| O(6)-P(6)-C(152)-C(153)     | 7.3(2)      |
| N(6)-P(6)-C(152)-C(153)     | 132.13(18)  |
| C(146)-P(6)-C(152)-C(153)   | -114.98(18) |
| O(6)-P(6)-C(152)-C(157)     | -174.65(17) |
| N(6)-P(6)-C(152)-C(157)     | -49.9(2)    |
| C(146)-P(6)-C(152)-C(157)   | 63.03(19)   |
| C(157)-C(152)-C(153)-C(154) | -1.2(4)     |
| P(6)-C(152)-C(153)-C(154)   | 176.8(2)    |
| C(152)-C(153)-C(154)-C(155) | -0.1(4)     |
| C(153)-C(154)-C(155)-C(156) | 0.8(5)      |
| C(154)-C(155)-C(156)-C(157) | -0.2(5)     |
| C(155)-C(156)-C(157)-C(152) | -1.1(4)     |
| C(153)-C(152)-C(157)-C(156) | 1.8(3)      |
| P(6)-C(152)-C(157)-C(156)   | -176.21(19) |
| P(6)-N(6)-C(158)-C(159)     | 75.68(18)   |
| P(6)-N(6)-C(158)-C(165)     | -155.60(13) |
| N(6)-C(158)-C(159)-C(164)   | -139.86(19) |
| C(165)-C(158)-C(159)-C(164) | 91.9(2)     |
| N(6)-C(158)-C(159)-C(160)   | 38.2(3)     |
| C(165)-C(158)-C(159)-C(160) | -90.0(2)    |
| C(164)-C(159)-C(160)-C(161) | -1.3(3)     |
| C(158)-C(159)-C(160)-C(161) | -179.45(19) |
| C(159)-C(160)-C(161)-C(162) | 0.8(3)      |
| C(160)-C(161)-C(162)-C(163) | -0.3(3)     |
| C(161)-C(162)-C(163)-C(164) | 0.3(4)      |
| C(162)-C(163)-C(164)-C(159) | -0.8(4)     |
| C(160)-C(159)-C(164)-C(163) | 1.3(3)      |
| C(158)-C(159)-C(164)-C(163) | 179.5(2)    |
| N(6)-C(158)-C(165)-C(167)   | 164.93(16)  |
| C(159)-C(158)-C(165)-C(167) | -66.7(2)    |
| N(6)-C(158)-C(165)-C(166)   | -74.8(2)    |



|                             |            |
|-----------------------------|------------|
| C(159)-C(158)-C(165)-C(166) | 53.6(2)    |
| N(6)-C(158)-C(165)-C(169)   | 45.7(2)    |
| C(159)-C(158)-C(165)-C(169) | 174.09(16) |
| C(166)-C(165)-C(167)-C(168) | 0.4(4)     |
| C(158)-C(165)-C(167)-C(168) | 119.6(3)   |
| C(169)-C(165)-C(167)-C(168) | -120.9(3)  |
| C(167)-C(165)-C(169)-C(174) | -64.6(2)   |
| C(166)-C(165)-C(169)-C(174) | 173.13(19) |
| C(158)-C(165)-C(169)-C(174) | 52.6(2)    |
| C(167)-C(165)-C(169)-C(170) | 60.7(3)    |
| C(166)-C(165)-C(169)-C(170) | -61.6(2)   |
| C(158)-C(165)-C(169)-C(170) | 177.87(19) |
| C(174)-C(169)-C(170)-C(171) | -54.5(3)   |
| C(165)-C(169)-C(170)-C(171) | 177.4(2)   |
| C(169)-C(170)-C(171)-C(172) | 55.8(3)    |
| C(170)-C(171)-C(172)-C(173) | -55.8(3)   |
| C(171)-C(172)-C(173)-C(174) | 57.5(3)    |
| C(172)-C(173)-C(174)-C(169) | -58.3(3)   |
| C(170)-C(169)-C(174)-C(173) | 55.3(3)    |
| C(165)-C(169)-C(174)-C(173) | -177.5(2)  |

---

Symmetry transformations used to generate equivalent atoms:

**Table 7. Hydrogen bonds for C<sub>29</sub>H<sub>34</sub>NOP (13) [Å and °]**

| D-H...A             | d(D-H) | d(H...A) | d(D...A) | <(DHA) |
|---------------------|--------|----------|----------|--------|
| N(1)-H(1N)...O(2)#1 | 0.88   | 2.12     | 2.979(2) | 164.7  |
| N(2)-H(2N)...O(1)#2 | 0.88   | 2.15     | 2.907(2) | 144.4  |
| N(3)-H(3N)...O(4)#3 | 0.88   | 2.11     | 2.913(2) | 151.1  |
| N(4)-H(4N)...O(3)#4 | 0.88   | 2.19     | 2.882(2) | 135.5  |
| N(5)-H(5N)...O(6)#5 | 0.88   | 1.96     | 2.833(2) | 173.0  |
| N(6)-H(6N)...O(5)#4 | 0.88   | 2.26     | 2.923(2) | 131.8  |

---

Symmetry transformations used to generate equivalent atoms:

#1  $x-1, y-1, z-1$  #2  $-x+1, y+1/2, -z+1$  #3  $-x+1, y-1/2, -z+2$

#4  $x, y+1, z$  #5  $-x+2, y-1/2, -z+1$

### Absolute Stereochemical Identity of 15a (Figure 3a)

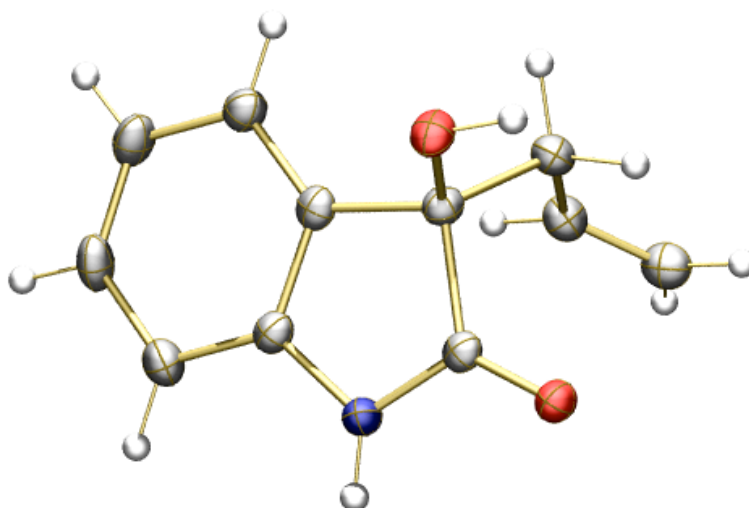

**Table 1. Crystal data and structure refinement for  $C_{11}H_{11}NO_2$  (15a)**

|                        |                                    |                     |
|------------------------|------------------------------------|---------------------|
| Identification code    | $C_{11}H_{11}NO_2$                 |                     |
| Empirical formula      | $C_{11}H_{11}NO_2$                 |                     |
| Formula weight         | 189.21                             |                     |
| Temperature            | 100(2) K                           |                     |
| Wavelength             | 1.54178 Å                          |                     |
| Crystal system         | Orthorhombic                       |                     |
| Space group            | $P2(1)2(1)2(1)$                    |                     |
| Unit cell dimensions   | $a = 7.4763(3)$ Å                  | $\alpha = 90^\circ$ |
|                        | $b = 7.5057(3)$ Å                  | $\beta = 90^\circ$  |
|                        | $c = 16.9951(7)$ Å                 | $\gamma = 90^\circ$ |
| Volume                 | $953.68(7)$ Å <sup>3</sup>         |                     |
| Z                      | 4                                  |                     |
| Density (calculated)   | 1.318 Mg/m <sup>3</sup>            |                     |
| Absorption coefficient | 0.745 mm <sup>-1</sup>             |                     |
| F(000)                 | 400                                |                     |
| Crystal size           | 0.20 x 0.10 x 0.07 mm <sup>3</sup> |                     |

|                                   |                                             |
|-----------------------------------|---------------------------------------------|
| Theta range for data collection   | 5.20 to 67.32°                              |
| Index ranges                      | -6<=h<=8, -8<=k<=8, -20<=l<=19              |
| Reflections collected             | 5081                                        |
| Independent reflections           | 1626 [R(int) = 0.0390]                      |
| Completeness to theta = 67.32°    | 97.4 %                                      |
| Absorption correction             | Semi-empirical from equivalents             |
| Max. and min. transmission        | 0.9497 and 0.8652                           |
| Refinement method                 | Full-matrix least-squares on F <sup>2</sup> |
| Data / restraints / parameters    | 1626 / 0 / 134                              |
| Goodness-of-fit on F <sup>2</sup> | 1.069                                       |
| Final R indices [I>2sigma(I)]     | R1 = 0.0298, wR2 = 0.0746                   |
| R indices (all data)              | R1 = 0.0308, wR2 = 0.0751                   |
| Absolute structure parameter      | 0.0(2)                                      |
| Extinction coefficient            | 0.0093(12)                                  |
| Largest diff. peak and hole       | 0.213 and -0.186 e.Å <sup>-3</sup>          |

**Table 2. Atomic coordinates ( x 10<sup>4</sup>) and equivalent isotropic displacement parameters (Å<sup>2</sup>x 10<sup>3</sup>) for C<sub>11</sub>H<sub>11</sub>NO<sub>2</sub> (15a). U(eq) is defined as one third of the trace of the orthogonalized U<sup>ij</sup> tensor.**

---

|       |         |         |          |       |
|-------|---------|---------|----------|-------|
| O(1)  | 2482(1) | 7117(1) | 10115(1) | 21(1) |
| O(2)  | 4795(1) | 7911(1) | 8720(1)  | 22(1) |
| N(1)  | 616(2)  | 6638(2) | 9063(1)  | 20(1) |
| C(1)  | 2220(2) | 6744(2) | 9414(1)  | 18(1) |
| C(2)  | 3694(2) | 6381(2) | 8795(1)  | 19(1) |
| C(3)  | 2590(2) | 6138(2) | 8062(1)  | 19(1) |
| C(4)  | 3115(2) | 5825(2) | 7292(1)  | 23(1) |
| C(5)  | 1792(2) | 5651(2) | 6720(1)  | 28(1) |
| C(6)  | -3(2)   | 5773(2) | 6921(1)  | 27(1) |
| C(7)  | -546(2) | 6101(2) | 7695(1)  | 24(1) |
| C(8)  | 792(2)  | 6280(2) | 8248(1)  | 20(1) |
| C(9)  | 4814(2) | 4750(2) | 9025(1)  | 21(1) |
| C(10) | 3789(2) | 3043(2) | 9088(1)  | 24(1) |
| C(11) | 3807(2) | 1972(2) | 9698(1)  | 28(1) |

---

**Table 3. Bond lengths [Å] and angles [°] for C<sub>11</sub>H<sub>11</sub>NO<sub>2</sub> (15a)**

|                 |            |
|-----------------|------------|
| O(1)-C(1)       | 1.2390(17) |
| O(2)-C(2)       | 1.4187(17) |
| O(2)-H(2O)      | 0.86(2)    |
| N(1)-C(1)       | 1.341(2)   |
| N(1)-C(8)       | 1.4179(17) |
| N(1)-H(1N)      | 0.846(19)  |
| C(1)-C(2)       | 1.5477(19) |
| C(2)-C(3)       | 1.5064(19) |
| C(2)-C(9)       | 1.533(2)   |
| C(3)-C(4)       | 1.3852(19) |
| C(3)-C(8)       | 1.386(2)   |
| C(4)-C(5)       | 1.394(2)   |
| C(4)-H(4)       | 0.9500     |
| C(5)-C(6)       | 1.388(2)   |
| C(5)-H(5)       | 0.9500     |
| C(6)-C(7)       | 1.398(2)   |
| C(6)-H(6)       | 0.9500     |
| C(7)-C(8)       | 1.379(2)   |
| C(7)-H(7)       | 0.9500     |
| C(9)-C(10)      | 1.497(2)   |
| C(9)-H(9A)      | 0.9900     |
| C(9)-H(9B)      | 0.9900     |
| C(10)-C(11)     | 1.312(2)   |
| C(10)-H(10)     | 0.9500     |
| C(11)-H(11A)    | 0.9500     |
| C(11)-H(11B)    | 0.9500     |
|                 |            |
| C(2)-O(2)-H(2O) | 108.3(14)  |
| C(1)-N(1)-C(8)  | 111.26(12) |
| C(1)-N(1)-H(1N) | 120.1(12)  |
| C(8)-N(1)-H(1N) | 128.1(12)  |
| O(1)-C(1)-N(1)  | 125.55(13) |
| O(1)-C(1)-C(2)  | 125.49(13) |
| N(1)-C(1)-C(2)  | 108.93(11) |

|                     |            |
|---------------------|------------|
| O(2)-C(2)-C(3)      | 109.98(11) |
| O(2)-C(2)-C(9)      | 110.65(11) |
| C(3)-C(2)-C(9)      | 114.43(11) |
| O(2)-C(2)-C(1)      | 109.34(11) |
| C(3)-C(2)-C(1)      | 101.16(11) |
| C(9)-C(2)-C(1)      | 110.86(11) |
| C(4)-C(3)-C(8)      | 120.25(13) |
| C(4)-C(3)-C(2)      | 130.28(14) |
| C(8)-C(3)-C(2)      | 109.47(11) |
| C(3)-C(4)-C(5)      | 118.27(14) |
| C(3)-C(4)-H(4)      | 120.9      |
| C(5)-C(4)-H(4)      | 120.9      |
| C(6)-C(5)-C(4)      | 120.55(13) |
| C(6)-C(5)-H(5)      | 119.7      |
| C(4)-C(5)-H(5)      | 119.7      |
| C(5)-C(6)-C(7)      | 121.58(14) |
| C(5)-C(6)-H(6)      | 119.2      |
| C(7)-C(6)-H(6)      | 119.2      |
| C(8)-C(7)-C(6)      | 116.63(14) |
| C(8)-C(7)-H(7)      | 121.7      |
| C(6)-C(7)-H(7)      | 121.7      |
| C(7)-C(8)-C(3)      | 122.71(13) |
| C(7)-C(8)-N(1)      | 128.16(14) |
| C(3)-C(8)-N(1)      | 109.14(13) |
| C(10)-C(9)-C(2)     | 114.96(12) |
| C(10)-C(9)-H(9A)    | 108.5      |
| C(2)-C(9)-H(9A)     | 108.5      |
| C(10)-C(9)-H(9B)    | 108.5      |
| C(2)-C(9)-H(9B)     | 108.5      |
| H(9A)-C(9)-H(9B)    | 107.5      |
| C(11)-C(10)-C(9)    | 125.14(14) |
| C(11)-C(10)-H(10)   | 117.4      |
| C(9)-C(10)-H(10)    | 117.4      |
| C(10)-C(11)-H(11A)  | 120.0      |
| C(10)-C(11)-H(11B)  | 120.0      |
| H(11A)-C(11)-H(11B) | 120.0      |

Symmetry transformations used to generate equivalent atoms:

**Table 4. Anisotropic displacement parameters ( $\text{\AA}^2 \times 10^3$ ) for  $\text{C}_{11}\text{H}_{11}\text{NO}_2$  (15a). The anisotropic displacement factor exponent takes the form:  $-2p^2 [ h^2 a^{*2}U^{11} + \dots + 2 h k a^* b^* U^{12} ]$**

|       | U <sup>11</sup> | U <sup>22</sup> | U <sup>33</sup> | U <sup>23</sup> | U <sup>13</sup> | U <sup>12</sup> |
|-------|-----------------|-----------------|-----------------|-----------------|-----------------|-----------------|
| O(1)  | 21(1)           | 23(1)           | 18(1)           | -1(1)           | 0(1)            | 0(1)            |
| O(2)  | 24(1)           | 21(1)           | 22(1)           | 2(1)            | -1(1)           | -6(1)           |
| N(1)  | 18(1)           | 25(1)           | 18(1)           | -1(1)           | 1(1)            | 2(1)            |
| C(1)  | 21(1)           | 14(1)           | 18(1)           | 2(1)            | 1(1)            | 0(1)            |
| C(2)  | 19(1)           | 19(1)           | 18(1)           | 0(1)            | 1(1)            | -2(1)           |
| C(3)  | 24(1)           | 14(1)           | 20(1)           | 1(1)            | 0(1)            | 1(1)            |
| C(4)  | 26(1)           | 22(1)           | 21(1)           | 0(1)            | 2(1)            | 3(1)            |
| C(5)  | 39(1)           | 26(1)           | 18(1)           | -3(1)           | -1(1)           | 7(1)            |
| C(6)  | 35(1)           | 26(1)           | 22(1)           | -4(1)           | -10(1)          | 7(1)            |
| C(7)  | 24(1)           | 24(1)           | 26(1)           | 0(1)            | -4(1)           | 3(1)            |
| C(8)  | 23(1)           | 17(1)           | 18(1)           | 0(1)            | 1(1)            | 1(1)            |
| C(9)  | 19(1)           | 22(1)           | 23(1)           | -1(1)           | 0(1)            | 1(1)            |
| C(10) | 24(1)           | 22(1)           | 26(1)           | -3(1)           | -2(1)           | 0(1)            |
| C(11) | 29(1)           | 22(1)           | 33(1)           | 0(1)            | 3(1)            | 1(1)            |

Table

**5. Hydrogen coordinates ( $\times 10^4$ ) and isotropic displacement parameters ( $\text{\AA}^2 \times 10^3$ ) for  $\text{C}_{11}\text{H}_{11}\text{NO}_2$  (15a)**

|       | x        | y        | z        | U(eq) |
|-------|----------|----------|----------|-------|
| H(2O) | 5560(30) | 7910(30) | 9102(11) | 33    |
| H(1N) | -320(30) | 6910(20) | 9315(10) | 24    |
| H(4)  | 4345     | 5731     | 7158     | 28    |
| H(5)  | 2121     | 5447     | 6187     | 33    |
| H(6)  | -885     | 5630     | 6523     | 33    |
| H(7)  | -1773    | 6195     | 7833     | 29    |

|        |      |      |       |    |
|--------|------|------|-------|----|
| H(9A)  | 5774 | 4593 | 8630  | 26 |
| H(9B)  | 5394 | 4991 | 9538  | 26 |
| H(10)  | 3068 | 2708 | 8652  | 29 |
| H(11A) | 4510 | 2259 | 10146 | 34 |
| H(11B) | 3116 | 909  | 9692  | 34 |

---

**Table 6. Torsion angles [°] for C<sub>11</sub>H<sub>11</sub>NO<sub>2</sub> (15a)**

|                     |             |
|---------------------|-------------|
| C(8)-N(1)-C(1)-O(1) | 176.77(13)  |
| C(8)-N(1)-C(1)-C(2) | -1.54(15)   |
| O(1)-C(1)-C(2)-O(2) | -60.30(18)  |
| N(1)-C(1)-C(2)-O(2) | 118.01(12)  |
| O(1)-C(1)-C(2)-C(3) | -176.30(13) |
| N(1)-C(1)-C(2)-C(3) | 2.01(14)    |
| O(1)-C(1)-C(2)-C(9) | 61.95(17)   |
| N(1)-C(1)-C(2)-C(9) | -119.74(12) |
| O(2)-C(2)-C(3)-C(4) | 62.35(19)   |
| C(9)-C(2)-C(3)-C(4) | -62.90(19)  |
| C(1)-C(2)-C(3)-C(4) | 177.88(15)  |
| O(2)-C(2)-C(3)-C(8) | -117.33(12) |
| C(9)-C(2)-C(3)-C(8) | 117.42(13)  |
| C(1)-C(2)-C(3)-C(8) | -1.80(14)   |
| C(8)-C(3)-C(4)-C(5) | -0.3(2)     |
| C(2)-C(3)-C(4)-C(5) | 180.00(14)  |
| C(3)-C(4)-C(5)-C(6) | -0.6(2)     |
| C(4)-C(5)-C(6)-C(7) | 1.1(2)      |
| C(5)-C(6)-C(7)-C(8) | -0.6(2)     |
| C(6)-C(7)-C(8)-C(3) | -0.4(2)     |
| C(6)-C(7)-C(8)-N(1) | 179.05(14)  |
| C(4)-C(3)-C(8)-C(7) | 0.8(2)      |
| C(2)-C(3)-C(8)-C(7) | -179.43(12) |
| C(4)-C(3)-C(8)-N(1) | -178.67(13) |
| C(2)-C(3)-C(8)-N(1) | 1.05(15)    |
| C(1)-N(1)-C(8)-C(7) | -179.15(14) |
| C(1)-N(1)-C(8)-C(3) | 0.34(16)    |

|                       |             |
|-----------------------|-------------|
| O(2)-C(2)-C(9)-C(10)  | -177.65(11) |
| C(3)-C(2)-C(9)-C(10)  | -52.74(17)  |
| C(1)-C(2)-C(9)-C(10)  | 60.87(16)   |
| C(2)-C(9)-C(10)-C(11) | -127.70(16) |

Symmetry transformations used to generate equivalent atoms:

**Table 7. Hydrogen bonds for C<sub>11</sub>H<sub>11</sub>NO<sub>2</sub> (15a) [Å and °]**

| D-H...A             | d(D-H)    | d(H...A) | d(D...A)   | <(DHA)    |
|---------------------|-----------|----------|------------|-----------|
| O(2)-H(2O)...O(1)#1 | 0.86(2)   | 1.96(2)  | 2.8209(14) | 174.0(18) |
| N(1)-H(1N)...O(1)#2 | 0.846(19) | 2.04(2)  | 2.8836(16) | 173.0(17) |

Symmetry transformations used to generate equivalent atoms:

#1  $x+1/2, -y+3/2, -z+2$  #2  $x-1/2, -y+3/2, -z+2$

### X-ray Crystal Structure of 21 (Figure 3c)

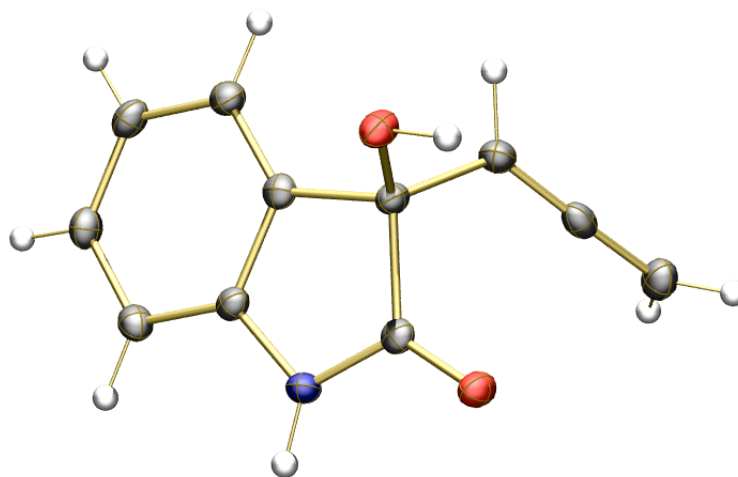

**Table 1. Crystal data and structure refinement for C<sub>11</sub>H<sub>9</sub>NO<sub>2</sub> (21)**

|                     |                                                |
|---------------------|------------------------------------------------|
| Identification code | C <sub>11</sub> H <sub>9</sub> NO <sub>2</sub> |
| Empirical formula   | C <sub>11</sub> H <sub>9</sub> NO <sub>2</sub> |
| Formula weight      | 187.19                                         |
| Temperature         | 100(2) K                                       |
| Wavelength          | 1.54178 Å                                      |



|                                   |                                             |                     |
|-----------------------------------|---------------------------------------------|---------------------|
| Crystal system                    | Orthorhombic                                |                     |
| Space group                       | P2(1)2(1)2(1)                               |                     |
| Unit cell dimensions              | a = 7.0851(7) Å                             | $\alpha = 90^\circ$ |
|                                   | b = 7.1233(7) Å                             | $\beta = 90^\circ$  |
|                                   | c = 17.6028(16) Å                           | $\gamma = 90^\circ$ |
| Volume                            | 888.40(15) Å <sup>3</sup>                   |                     |
| Z                                 | 4                                           |                     |
| Density (calculated)              | 1.400 Mg/m <sup>3</sup>                     |                     |
| Absorption coefficient            | 0.800 mm <sup>-1</sup>                      |                     |
| F(000)                            | 392                                         |                     |
| Crystal size                      | 0.15 x 0.12 x 0.06 mm <sup>3</sup>          |                     |
| Theta range for data collection   | 5.02 to 68.81°.                             |                     |
| Index ranges                      | -8<=h<=8, -8<=k<=8, -21<=l<=18              |                     |
| Reflections collected             | 10395                                       |                     |
| Independent reflections           | 1579 [R(int) = 0.0346]                      |                     |
| Completeness to theta = 68.00°    | 98.6 %                                      |                     |
| Absorption correction             | Semi-empirical from equivalents             |                     |
| Max. and min. transmission        | 0.9536 and 0.8895                           |                     |
| Refinement method                 | Full-matrix least-squares on F <sup>2</sup> |                     |
| Data / restraints / parameters    | 1579 / 0 / 142                              |                     |
| Goodness-of-fit on F <sup>2</sup> | 1.088                                       |                     |
| Final R indices [I>2sigma(I)]     | R1 = 0.0250, wR2 = 0.0641                   |                     |
| R indices (all data)              | R1 = 0.0260, wR2 = 0.0652                   |                     |
| Absolute structure parameter      | 0.21(19)                                    |                     |
| Extinction coefficient            | na                                          |                     |
| Largest diff. peak and hole       | 0.146 and -0.176 e.Å <sup>-3</sup>          |                     |

**Table 2. Atomic coordinates (x 10<sup>4</sup>) and equivalent isotropic displacement parameters (Å<sup>2</sup>x 10<sup>3</sup>) for C<sub>11</sub>H<sub>9</sub>NO<sub>2</sub> (21). U(eq) is defined as one third of the trace of the orthogonalized U<sup>ij</sup> tensor.**

|      | x       | y       | z        | U(eq) |
|------|---------|---------|----------|-------|
| O(1) | 2374(1) | 1954(1) | 10038(1) | 18(1) |
| O(2) | 4912(1) | 2864(1) | 8733(1)  | 18(1) |
| N(1) | 412(2)  | 1808(2) | 9004(1)  | 16(1) |

|       |         |          |         |       |
|-------|---------|----------|---------|-------|
| C(1)  | 2085(2) | 1710(2)  | 9352(1) | 15(1) |
| C(2)  | 3632(2) | 1335(2)  | 8749(1) | 15(1) |
| C(3)  | 2481(2) | 1311(2)  | 8024(1) | 15(1) |
| C(4)  | 3020(2) | 1036(2)  | 7280(1) | 18(1) |
| C(5)  | 1632(2) | 1064(2)  | 6717(1) | 20(1) |
| C(6)  | -256(2) | 1347(2)  | 6908(1) | 20(1) |
| C(7)  | -816(2) | 1598(2)  | 7662(1) | 19(1) |
| C(8)  | 584(2)  | 1576(2)  | 8207(1) | 16(1) |
| C(9)  | 4648(2) | -509(2)  | 8866(1) | 18(1) |
| C(10) | 4259(2) | -1798(2) | 9364(1) | 18(1) |
| C(11) | 3899(2) | -3140(2) | 9842(1) | 23(1) |

---

**Table 3. Bond lengths [Å] and angles [°] for C<sub>11</sub>H<sub>9</sub>NO<sub>2</sub> (21)**

|            |            |
|------------|------------|
| O(1)-C(1)  | 1.2370(15) |
| O(2)-C(2)  | 1.4177(16) |
| O(2)-H(2O) | 0.858(19)  |
| N(1)-C(1)  | 1.3361(17) |
| N(1)-C(8)  | 1.4176(16) |
| N(1)-H(1N) | 0.882(18)  |
| C(1)-C(2)  | 1.5500(17) |
| C(2)-C(9)  | 1.5124(19) |
| C(2)-C(3)  | 1.5132(17) |
| C(3)-C(4)  | 1.3798(18) |
| C(3)-C(8)  | 1.3944(18) |
| C(4)-C(5)  | 1.3960(19) |
| C(4)-H(4)  | 0.9500     |
| C(5)-C(6)  | 1.394(2)   |
| C(5)-H(5)  | 0.9500     |
| C(6)-C(7)  | 1.3961(18) |
| C(6)-H(6)  | 0.9500     |
| C(7)-C(8)  | 1.3807(19) |
| C(7)-H(7)  | 0.9500     |
| C(9)-C(10) | 1.299(2)   |

|                 |            |
|-----------------|------------|
| C(9)-H(9)       | 0.989(17)  |
| C(10)-C(11)     | 1.299(2)   |
| C(11)-H(11A)    | 0.946(18)  |
| C(11)-H(11B)    | 0.975(19)  |
|                 |            |
| C(2)-O(2)-H(2O) | 107.7(13)  |
| C(1)-N(1)-C(8)  | 111.82(11) |
| C(1)-N(1)-H(1N) | 122.2(11)  |
| C(8)-N(1)-H(1N) | 125.2(11)  |
| O(1)-C(1)-N(1)  | 125.98(11) |
| O(1)-C(1)-C(2)  | 125.21(11) |
| N(1)-C(1)-C(2)  | 108.75(10) |
| O(2)-C(2)-C(9)  | 111.41(10) |
| O(2)-C(2)-C(3)  | 109.71(10) |
| C(9)-C(2)-C(3)  | 111.19(11) |
| O(2)-C(2)-C(1)  | 109.46(10) |
| C(9)-C(2)-C(1)  | 113.18(11) |
| C(3)-C(2)-C(1)  | 101.45(10) |
| C(4)-C(3)-C(8)  | 120.33(12) |
| C(4)-C(3)-C(2)  | 130.78(12) |
| C(8)-C(3)-C(2)  | 108.87(11) |
| C(3)-C(4)-C(5)  | 118.54(12) |
| C(3)-C(4)-H(4)  | 120.7      |
| C(5)-C(4)-H(4)  | 120.7      |
| C(6)-C(5)-C(4)  | 120.42(13) |
| C(6)-C(5)-H(5)  | 119.8      |
| C(4)-C(5)-H(5)  | 119.8      |
| C(5)-C(6)-C(7)  | 121.36(12) |
| C(5)-C(6)-H(6)  | 119.3      |
| C(7)-C(6)-H(6)  | 119.3      |
| C(8)-C(7)-C(6)  | 117.11(12) |
| C(8)-C(7)-H(7)  | 121.4      |
| C(6)-C(7)-H(7)  | 121.4      |
| C(7)-C(8)-C(3)  | 122.23(12) |
| C(7)-C(8)-N(1)  | 128.68(12) |
| C(3)-C(8)-N(1)  | 109.09(11) |

|                     |            |
|---------------------|------------|
| C(10)-C(9)-C(2)     | 127.19(12) |
| C(10)-C(9)-H(9)     | 121.7(10)  |
| C(2)-C(9)-H(9)      | 111.1(10)  |
| C(11)-C(10)-C(9)    | 177.59(14) |
| C(10)-C(11)-H(11A)  | 120.1(11)  |
| C(10)-C(11)-H(11B)  | 123.5(10)  |
| H(11A)-C(11)-H(11B) | 116.3(15)  |

---

Symmetry transformations used to generate equivalent atoms:

**Table 4. Anisotropic displacement parameters ( $\text{\AA}^2 \times 10^3$ ) for  $\text{C}_{11}\text{H}_9\text{NO}_2$  (21). The anisotropic displacement factor exponent takes the form:  $-2p^2 [ h^2 a^{*2} U^{11} + \dots + 2 h k a^* b^* U^{12} ]$**

|       | $U^{11}$ | $U^{22}$ | $U^{33}$ | $U^{23}$ | $U^{13}$ | $U^{12}$ |
|-------|----------|----------|----------|----------|----------|----------|
| O(1)  | 17(1)    | 22(1)    | 14(1)    | -1(1)    | 0(1)     | -1(1)    |
| O(2)  | 18(1)    | 20(1)    | 15(1)    | 1(1)     | -1(1)    | -5(1)    |
| N(1)  | 14(1)    | 20(1)    | 15(1)    | 0(1)     | 2(1)     | 2(1)     |
| C(1)  | 17(1)    | 11(1)    | 16(1)    | 1(1)     | 0(1)     | -1(1)    |
| C(2)  | 15(1)    | 17(1)    | 13(1)    | 1(1)     | 1(1)     | -1(1)    |
| C(3)  | 17(1)    | 12(1)    | 17(1)    | 0(1)     | 0(1)     | -2(1)    |
| C(4)  | 19(1)    | 17(1)    | 18(1)    | 0(1)     | 2(1)     | 0(1)     |
| C(5)  | 28(1)    | 19(1)    | 14(1)    | -1(1)    | 1(1)     | -1(1)    |
| C(6)  | 23(1)    | 20(1)    | 17(1)    | 0(1)     | -5(1)    | 0(1)     |
| C(7)  | 17(1)    | 18(1)    | 21(1)    | 1(1)     | -1(1)    | -1(1)    |
| C(8)  | 19(1)    | 14(1)    | 14(1)    | 0(1)     | 2(1)     | 1(1)     |
| C(9)  | 17(1)    | 20(1)    | 18(1)    | 0(1)     | 2(1)     | 2(1)     |
| C(10) | 16(1)    | 20(1)    | 19(1)    | -5(1)    | -2(1)    | 5(1)     |
| C(11) | 28(1)    | 20(1)    | 21(1)    | 2(1)     | 0(1)     | 5(1)     |

**Table 5. Hydrogen coordinates ( $\times 10^4$ ) and isotropic displacement parameters ( $\text{\AA}^2 \times 10^3$ ) for  $\text{C}_{11}\text{H}_9\text{NO}_2$  (21)**

|        | x        | y         | z         | U(eq) |
|--------|----------|-----------|-----------|-------|
| H(2O)  | 5500(30) | 2880(30)  | 9159(11)  | 27    |
| H(1N)  | -620(30) | 2170(20)  | 9242(9)   | 20    |
| H(4)   | 4306     | 831       | 7152      | 22    |
| H(5)   | 1976     | 888       | 6200      | 24    |
| H(6)   | -1181    | 1371      | 6517      | 24    |
| H(7)   | -2104    | 1775      | 7793      | 22    |
| H(9)   | 5680(20) | -670(20)  | 8493(9)   | 22    |
| H(11A) | 4500(20) | -3160(30) | 10323(10) | 28    |
| H(11B) | 3010(20) | -4160(30) | 9740(10)  | 28    |

**Table 6. Torsion angles [°] for C<sub>11</sub>H<sub>9</sub>NO<sub>2</sub> (21)**

|                     |             |
|---------------------|-------------|
| C(8)-N(1)-C(1)-O(1) | 176.22(12)  |
| C(8)-N(1)-C(1)-C(2) | -1.07(14)   |
| O(1)-C(1)-C(2)-O(2) | -59.86(16)  |
| N(1)-C(1)-C(2)-O(2) | 117.46(11)  |
| O(1)-C(1)-C(2)-C(9) | 65.06(16)   |
| N(1)-C(1)-C(2)-C(9) | -117.62(12) |
| O(1)-C(1)-C(2)-C(3) | -175.74(12) |
| N(1)-C(1)-C(2)-C(3) | 1.58(13)    |
| O(2)-C(2)-C(3)-C(4) | 64.53(17)   |
| C(9)-C(2)-C(3)-C(4) | -59.16(18)  |
| C(1)-C(2)-C(3)-C(4) | -179.77(13) |
| O(2)-C(2)-C(3)-C(8) | -117.25(11) |
| C(9)-C(2)-C(3)-C(8) | 119.06(12)  |
| C(1)-C(2)-C(3)-C(8) | -1.55(13)   |
| C(8)-C(3)-C(4)-C(5) | 1.14(19)    |
| C(2)-C(3)-C(4)-C(5) | 179.19(13)  |
| C(3)-C(4)-C(5)-C(6) | -0.6(2)     |
| C(4)-C(5)-C(6)-C(7) | -0.4(2)     |

|                       |             |
|-----------------------|-------------|
| C(5)-C(6)-C(7)-C(8)   | 0.8(2)      |
| C(6)-C(7)-C(8)-C(3)   | -0.25(19)   |
| C(6)-C(7)-C(8)-N(1)   | 179.48(13)  |
| C(4)-C(3)-C(8)-C(7)   | -0.74(19)   |
| C(2)-C(3)-C(8)-C(7)   | -179.18(12) |
| C(4)-C(3)-C(8)-N(1)   | 179.48(11)  |
| C(2)-C(3)-C(8)-N(1)   | 1.04(14)    |
| C(1)-N(1)-C(8)-C(7)   | -179.73(13) |
| C(1)-N(1)-C(8)-C(3)   | 0.03(15)    |
| O(2)-C(2)-C(9)-C(10)  | 129.44(14)  |
| C(3)-C(2)-C(9)-C(10)  | -107.84(16) |
| C(1)-C(2)-C(9)-C(10)  | 5.6(2)      |
| C(2)-C(9)-C(10)-C(11) | 152(4)      |

---

Symmetry transformations used to generate equivalent atoms:

**Table 7. Hydrogen bonds for C<sub>11</sub>H<sub>9</sub>NO<sub>2</sub> (21) [Å and °].**

| D-H...A             | d(D-H)    | d(H...A)  | d(D...A)   | <(DHA)    |
|---------------------|-----------|-----------|------------|-----------|
| O(2)-H(2O)...O(1)#1 | 0.858(19) | 1.942(19) | 2.7812(13) | 165.6(17) |
| N(1)-H(1N)...O(1)#2 | 0.882(18) | 2.003(18) | 2.8729(15) | 168.6(15) |

---

Symmetry transformations used to generate equivalent atoms:

#1  $x+1/2, -y+1/2, -z+2$  #2  $x-1/2, -y+1/2, -z+2$
